# Supplementary material for: Ruthenium-catalyzed benzylic substitution of benzyl esters with stabilized carbon nucleophiles
Source: Royal Society of Chemistry journal article supplement (doi:10.1039/c9cc09899b), 2020-01-01
Supplement: c9cc09899b1.pdf [file c9cc09899b1.pdf]

## *Supporting Information*

### **Ruthenium-Catalyzed Benzylic Substitution of Benzyl Esters with Stabilized Carbon Nucleophiles**

Koki Suzuki, Hiroaki Tsuji\* and Motoi Kawatsura\*

Department of Chemistry, College of Humanities & Sciences, Nihon University,  
Sakurajosui, Setagaya-ku, Tokyo 156-8550, Japan

tsuji@chs.nihon-u.ac.jp

kawatsur@chs.nihon-u.ac.jp

#### **Table of Contents**

|                                                                                                                                |          |
|--------------------------------------------------------------------------------------------------------------------------------|----------|
| 1. General experimental remarks                                                                                                | S2       |
| 2. General procedure for the preparation of 2-naphthylmethyl<br>2,3,4,5,6-pentafluorobenzoates <b>1c–e</b> and <b>1g</b>       | S2–S10   |
| 3. General procedure for the ruthenium-catalyzed benzylic substitution of benzyl<br>esters with stabilized carbon nucleophiles | S10–S22  |
| 4. Experimental details for the mechanistic experiments                                                                        | S23–S25  |
| 5. Experimental details for the reaction of non-fused aromatic substrates                                                      | S26–S27  |
| 6. References                                                                                                                  | S28      |
| 7. Copies of NMR spectra ( <sup>1</sup> H, <sup>13</sup> C, and <sup>19</sup> F) and HPLC chromatograms                        | S29–S114 |

## 1. General experimental remarks

Commercially available chemicals were purchased from Aldrich, TCI, Kanto, and Wako and used without further purification unless otherwise noted. Benzyl 2,3,4,5,6-pentafluorobenzoates **1a**, **1b**, **1f**, **1h**, **1i**, **1j**, and **1k** were prepared according to the our previously reported method.<sup>1</sup> Ruthenium(III) chloride hydrate was purchased from Oakwood chemical. [Cp\*RuCl<sub>2</sub>]<sub>2</sub> was prepared according to the literature.<sup>2</sup> NMR spectra were recorded at 25 °C on a JEOL EX-270 spectrometer (270 MHz for <sup>1</sup>H, 67.9 MHz for <sup>13</sup>C) or a JEOL JNM ECP-500 spectrometer (500 MHz for <sup>1</sup>H, 126 MHz for <sup>13</sup>C, 471 MHz for <sup>19</sup>F). Chemical shifts are reported in δ ppm referenced to an internal tetramethylsilane (0 ppm) for <sup>1</sup>H NMR. Chemical shifts of <sup>13</sup>C NMR are given relative to the solvent peak as an internal standard. <sup>19</sup>F NMR data are reported relative to external α,α,α-trifluorotoluene (−63.7 ppm). Multiplicities are indicated as br (broad), s (singlet), d (doublet), t (triplet), q (quartet), or m (multiplet). Coupling constants (*J*) are reported in Hertz (Hz). Melting points were measured on a Yanako MP-500P. Infrared (IR) spectra were recorded on JASCO FT/IR-400 plus. GC-MS measurements were carried out with JEOL JMS-Q1000GC/K9. HRMS analyses were carried out using a JEOL AccuTOF LCplus for ESI-MS and APCI-MS, Waters G2-S Q-ToF for ESI-MS, and JEOL GCmate for EI-MS. Column chromatography and preparative thin-layer chromatography were conducted with silica gel 60N (KANTO CHEMICAL, spherical, neutral, 40-50 or 63-210 μm) and Wakogel<sup>®</sup> B-5F (45 μm), respectively. For thin-layer chromatography (TLC) analyses throughout this work, Merck precoated TLC plates (silica gel 60 F254 0.25 mm) were used. Visualization was accomplished by UV light (254 nm), phosphomolybdic acid, and I<sub>2</sub>/SiO<sub>2</sub>.

## 2. General procedure for the preparation of benzyl 2,3,4,5,6-pentafluorobenzoates **1c–e** and **1g**

**Scheme S1.** Preparation of benzyl 2,3,4,5,6-pentafluorobenzoate **1c**

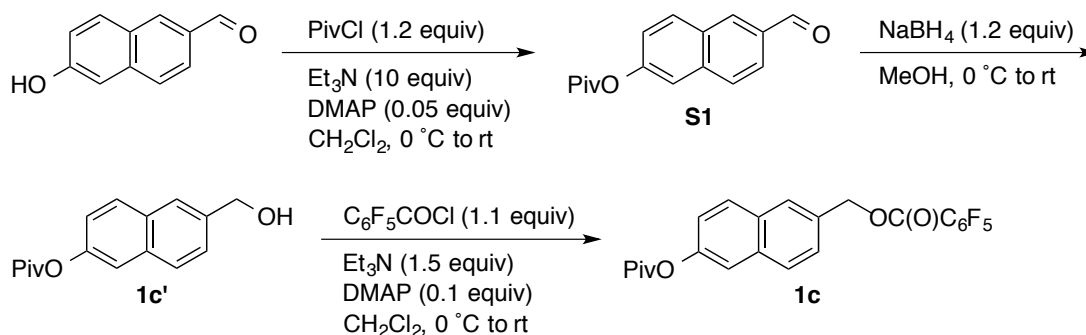

Preparation of 6-formylnaphthalen-2-yl pivalate (**S1**):

6-Hydroxy-2-naphthaldehyde (861 mg, 5.00 mmol) and DMAP (30.5 mg, 0.25 mmol, 0.05 equiv) were charged into a round flask and the flask was refilled with N<sub>2</sub>. CH<sub>2</sub>Cl<sub>2</sub> (10 mL) and triethylamine (7.0 mL, 50 mmol, 10 equiv) were added to the flask. Pivaroyl chloride (0.74 mL, 6.0 mmol, 1.2 equiv) was added dropwise to the mixture at 0 °C. The resulting mixture was allowed to warm to room temperature and stirred for 3 h. The reaction was quenched with water and the resulting aqueous phase was extracted with CH<sub>2</sub>Cl<sub>2</sub> (70 mL×3). The combined organic phase was washed with brine and dried over MgSO<sub>4</sub>. After removal of the solvent, the resulting crude mixture was purified by silica gel column chromatography to give 6-formylnaphthalen-2-yl pivalate (**S1**) as a white solid (1.10 g, 4.29 mmol, 86% yield).

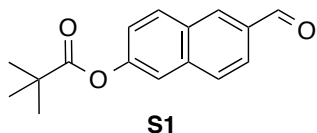

M.p. 98.3–99.6 °C; IR (KBr) 2983, 2876, 1745, 1692, 1472, 1105, 913, 817 cm<sup>-1</sup>; <sup>1</sup>H NMR (270 MHz, CDCl<sub>3</sub>): δ 1.42 (s, 9H), 7.32 (dd, *J* = 8.9, 2.2 Hz, 1H), 7.61 (d, *J* = 2.2 Hz, 1H), 7.89 (d, *J* = 8.6 Hz, 1H), 7.97 (dd, *J* = 8.6, 1.6 Hz, 1H), 8.02 (d, *J* = 8.9 Hz, 1H), 8.34 (s, 1H), 10.1 (s, 1H); <sup>13</sup>C NMR (67.9 MHz, CDCl<sub>3</sub>): δ 27.1, 39.2, 118.8, 122.5, 123.5, 128.7, 130.4, 131.0, 133.9, 134.1, 137.1, 151.3, 176.9, 192.0; HRMS (APCI/TOF) *m/z*: [M+H]<sup>+</sup> Calcd for C<sub>16</sub>H<sub>17</sub>O<sub>3</sub> 257.1178; Found 257.1187.

Preparation of 6-(hydroxymethyl)naphthalen-2-yl pivalate (**1c'**):

NaBH<sub>4</sub> (174 mg, 4.60 mmol, 1.2 equiv) was added to a solution of 6-formylnaphthalen-2-yl pivalate (**S3**) (981 mg, 3.8 mmol) in MeOH (13 mL) at 0 °C. The resulting mixture was stirred for 2 h at room temperature. MeOH was removed by evaporation and the resulting mixture was transferred to a separating funnel with EtOAc and water. The aqueous phase was extracted with EtOAc (80 mL×2). The combined organic phase was washed with brine and dried over MgSO<sub>4</sub>. After removal of the solvent, the resulting crude mixture was purified by silica gel column chromatography (Hexane/EtOAc = 5/1, 4/1, 10/3, 20/7) to give 6-(hydroxymethyl)naphthalen-2-yl pivalate (**1c'**) as a white solid (458 mg, 1.77 mmol, 47% yield).

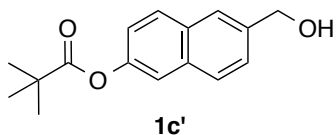

M.p. 126.3–127.4 °C; IR (KBr) 3326, 2962, 2932, 2871, 1749, 1476, 1279, 1150, 1030, 906, 816  $\text{cm}^{-1}$ ;  $^1\text{H}$  NMR (270 MHz,  $\text{CDCl}_3$ ):  $\delta$  1.40 (s, 9H), 1.72 (bs, 1H), 4.85 (s, 2H), 7.20 (dd,  $J = 8.9, 2.4$  Hz, 1H), 7.48 (dd,  $J = 8.2, 1.8$  Hz, 1H), 7.52 (d,  $J = 2.4$  Hz, 1H), 7.77–7.84 (m, 3H);  $^{13}\text{C}$  NMR (67.9 MHz,  $\text{CDCl}_3$ ):  $\delta$  27.1, 39.1, 65.1, 118.2, 121.4, 125.2, 125.8, 127.9, 129.2, 131.2, 133.2, 138.1, 148.7, 177.3; HRMS (ESI/TOF)  $m/z$ :  $[\text{M}+\text{Na}]^+$  Calcd for  $\text{C}_{16}\text{H}_{18}\text{O}_3\text{Na}$  281.1154; Found 281.1152.

Preparation of (6-(pivaloyloxymethyl)naphthalen-2-yl)methyl 2,3,4,5,6-pentafluorobenzoate (**1c**):

6-(Hydroxymethyl)naphthalen-2-yl pivalate (**1c'**) (450 mg, 1.74 mmol) and DMAP (21.3 mg, 0.174 mmol, 0.1 equiv) were charged into a round flask and the flask was refilled with  $\text{N}_2$ . THF (6 mL) and triethylamine (0.36 mL, 2.60 mmol, 1.5 equiv) were added to the flask. Pentafluorobenzoyl chloride (0.30 mL, 1.91 mmol, 1.1 equiv) was added dropwise to the mixture at 0 °C. The resulting mixture was allowed to warm to room temperature and stirred for 20 min. The reaction was quenched with water and the resulting aqueous phase was extracted with EtOAc (50 mL $\times$ 2). The combined organic phase was washed with brine and dried over  $\text{MgSO}_4$ . After removal of the solvent, the resulting crude mixture was purified by silica gel column chromatography (Hexane/EtOAc = 95/5, 92/8, 9/1) to give (6-(pivaloyloxymethyl)naphthalen-2-yl)methyl 2,3,4,5,6-pentafluorobenzoate (**1c**) as a white solid (643 mg, 1.42 mmol, 84% yield).

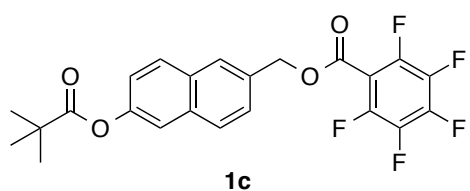

M.p. 114.9–115.4 °C; IR (KBr) 2983, 2876, 1756, 1731, 1655, 1498, 1322, 1230, 1140, 1013, 907, 810  $\text{cm}^{-1}$ ;  $^1\text{H}$  NMR (500 MHz,  $\text{CDCl}_3$ ):  $\delta$  1.41 (s, 9H), 5.56 (s, 2H), 7.23 (dd,  $J = 8.5, 2.3$  Hz, 1H), 7.53 (dd,  $J = 8.0, 1.5$  Hz, 1H), 7.54 (d,  $J = 2.3$  Hz, 1H), 7.83 (d,  $J = 8.5$  Hz, 1H), 7.86 (d,  $J = 9.0$  Hz, 1H), 7.90 (s, 1H);  $^{13}\text{C}$  NMR (126 MHz,  $\text{CDCl}_3$ ):  $\delta$  27.1, 39.1, 68.4, 108.0 (m), 118.3, 121.8, 126.4, 127.6, 128.3, 129.4, 131.0, 131.7, 133.7, 137.7 (dm,  $J_{\text{CF}} = 256$  Hz), 143.3 (dm,  $J_{\text{CF}} = 261$  Hz), 145.5 (dm,  $J_{\text{CF}} = 258$  Hz), 149.4, 158.9, 177.1;  $^{19}\text{F}$  NMR (471 MHz,  $\text{CDCl}_3$ ):  $\delta$  -138.7 – -138.8 (m,

2F), -149.1 (tt,  $J = 21.2, 4.9$  Hz, 1F), -161.1 – -161.2 (m, 2F); HRMS (EI)  $m/z$ :  $[M]^+$   
 Calcd for  $C_{23}H_{17}O_4F_5$  452.1047; Found 452.1047.

**Scheme S2.** Preparation of benzyl 2,3,4,5,6-perfluorobenzoate **1d**

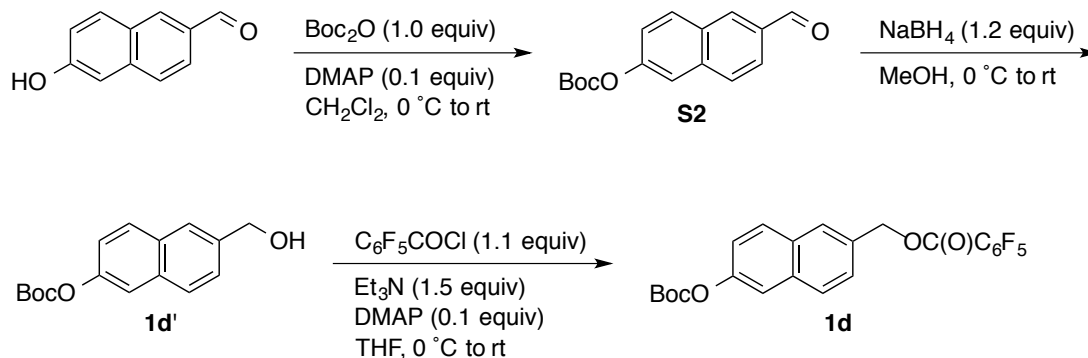

Preparation of *tert*-butyl (6-formylnaphthalen-2-yl) carbonate (**S2**):

6-Hydroxy-2-naphthaldehyde (861 mg, 5.00 mmol) and DMAP (61.1 mg, 0.50 mmol, 0.1 equiv) were charged into a round flask and the flask was refilled with  $N_2$ .  $CH_2Cl_2$  (10 mL) was added to the flask. A solution of  $Boc_2O$  (1.09 g, 5.00 mmol, 1.0 equiv) in  $CH_2Cl_2$  was added dropwise to the resulting mixture at 0 °C. After stirring the reaction mixture at room temperature for 1 h, the reaction was quenched with water and the resulting aqueous phase was extracted with  $CH_2Cl_2$  (80 mL $\times$ 2). The combined organic phase was washed with brine and dried over  $MgSO_4$ . After removal of the solvent, the resulting crude mixture was purified by silica gel column chromatography (Hexane/EtOAc = 9/1, 85/15) to give *tert*-butyl (6-formylnaphthalen-2-yl) carbonate (**S2**) as a white solid (1.23 g, 4.52 mmol, 90% yield).

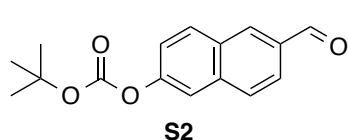

M.p. 105.7–106.8 °C; IR (KBr) 2979, 2942, 2863, 1751, 1693, 1476, 1374, 1288, 1257, 1147, 899, 823, 778  $cm^{-1}$ ;  
 $^1H$  NMR (270 MHz,  $CDCl_3$ ):  $\delta$  1.60 (s, 9H), 7.43 (dd,  $J = 8.9, 2.3$  Hz, 1H), 7.73 (d,  $J = 2.3$  Hz, 1H), 7.90 (d,  $J = 8.6$  Hz, 1H), 7.97 (dd,  $J = 8.6, 1.4$  Hz, 1H), 8.02 (d,  $J = 8.9$  Hz, 1H), 8.34 (s, 1H), 10.1 (s, 1H);  $^{13}C$  NMR (67.9 MHz,  $CDCl_3$ ):  $\delta$  27.7, 84.1, 118.4, 122.2, 123.5, 128.8, 130.4, 131.0, 133.9, 134.0, 137.0, 151.1, 151.5, 191.9; HRMS (APCI/TOF)  $m/z$ :  $[M+H]^+$  Calcd for  $C_{16}H_{17}O_4$  273.1127; Found 273.1120.

Preparation of (6-((*tert*-butoxycarbonyl)oxy)naphthalen-2-yl)methyl 2,3,4,5,6-pentafluorobenzoate (**1d**):

NaBH<sub>4</sub> (182 mg, 4.80 mmol, 1.2 equiv) was added to a solution of *tert*-butyl (6-formylnaphthalen-2-yl) carbonate (**S2**) (1.10 g, 4.0 mmol) in MeOH (13 mL) at 0 °C. The resulting mixture was stirred overnight at room temperature. MeOH was removed by evaporation and the resulting mixture was transferred to a separating funnel with EtOAc and water. The aqueous phase was extracted with EtOAc (80 mL×2). The combined organic phase was washed with brine and dried over MgSO<sub>4</sub>. After removal of the solvent, alcohol **1d'** was obtained as a crude mixture and this mixture was used next step without further purification. The crude mixture and DMAP (49.0 mg, 0.40 mmol, 0.1 equiv) were placed in a round flask and refilled with N<sub>2</sub>. THF (12 mL) and triethylamine (0.82 mL, 5.90 mmol, 1.5 equiv) were added to the flask. Pentafluorobenzoyl chloride (0.60 mL, 4.30 mmol, 1.1 equiv) was added dropwise to the mixture at 0 °C. The resulting mixture was allowed to warm to room temperature and stirred for 2 h. The reaction was quenched with water and the resulting aqueous phase was extracted with EtOAc (80 mL×3). The combined organic phase was washed with brine and dried over MgSO<sub>4</sub>. After removal of the solvent, the resulting crude mixture was purified by silica gel column chromatography (Hexane/EtOAc = 92/8, 9/1, 88/12) to give (6-((*tert*-butoxycarbonyl)oxy)naphthalen-2-yl)methyl 2,3,4,5,6-pentafluorobenzoate (**1d**) as a white solid (1.50 g, 3.20 mmol, 82% yield).

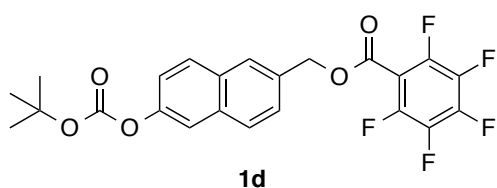

M.p. 107.6–109.8 °C; IR (KBr) 2985, 2936, 1752, 1739, 1651, 1496, 1325, 1226, 1142, 1005, 895 cm<sup>-1</sup>; <sup>1</sup>H NMR (500 MHz, CDCl<sub>3</sub>): δ 1.59 (s, 9H), 5.55 (s, 2H), 7.35 (dd, *J* = 8.5, 2.5 Hz, 1H), 7.53 (dd, *J* = 8.3, 1.8 Hz, 1H), 7.66 (d, *J* = 2.5 Hz, 1H), 7.84 (d, *J* = 9.0 Hz, 1H), 7.86 (d, *J* = 9.0 Hz, 1H), 7.89 (s, 1H); <sup>13</sup>C NMR (126 MHz, CDCl<sub>3</sub>): δ 27.7, 68.4, 83.8, 108.0 (m), 118.1, 121.5, 126.4, 127.6, 128.4, 129.5, 131.0, 131.8, 133.6, 137.7 (dm, *J*<sub>CF</sub> = 256 Hz), 143.3 (dm, *J*<sub>CF</sub> = 261 Hz), 145.5 (dm, *J*<sub>CF</sub> = 262 Hz), 149.3, 151.8, 158.9; <sup>19</sup>F NMR (471 MHz, CDCl<sub>3</sub>): δ -138.7– -138.8 (m, 2F), 149.1 (tt, *J* = 20.7, 4.8 Hz, 1F), -161.1– -161.2 (m, 2F); HRMS (ESI/QTOF) [M+Na]<sup>+</sup> Calcd for C<sub>23</sub>H<sub>17</sub>F<sub>5</sub>O<sub>5</sub>Na, 491.0894; Found 491.0897.

**Scheme S3.** Preparation of benzyl 2,3,4,5,6-perfluorobenzoate **1e**

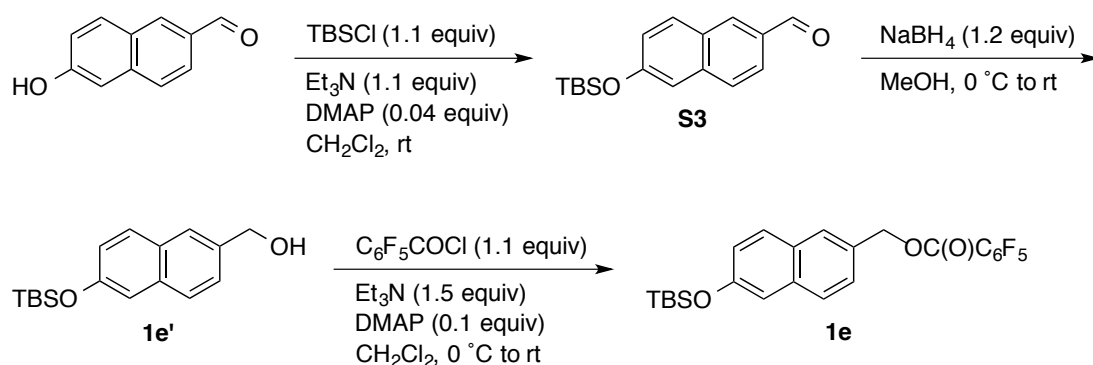

Preparation of 6-((*tert*-butyldimethylsilyl)oxy)-2-naphthaldehyde (**S3**):

6-Hydroxy-2-naphthaldehyde (861 mg, 5.00 mmol), TBSCl (829 mg, 5.50 mmol, 1.1 equiv), and DMAP (24.4 mg, 0.20 mmol, 0.04 equiv) were charged into a round flask and the flask was refilled with N<sub>2</sub>. CH<sub>2</sub>Cl<sub>2</sub> (17 mL) and triethylamine (0.8 mL, 5.5 mmol, 1.1 equiv) were added to the flask. The resulting mixture was stirred at room temperature for 3 hours. The reaction was quenched with water and the resulting aqueous phase was extracted with CH<sub>2</sub>Cl<sub>2</sub> (80 mL × 2). The combined organic phase was washed with brine and dried over MgSO<sub>4</sub>. After removal of the solvent, the resulting crude mixture was purified by silica gel column chromatography (Hexane/EtOAc = 95/5, 9/1) to give 6-((*tert*-butyldimethylsilyl)oxy)-2-naphthaldehyde (**S3**) as a white solid (1.29 g, 4.50 mmol, 90% yield).

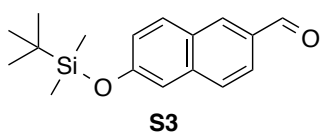

M.p. 46.9–48.1 °C; IR (KBr) 2958, 2928, 2855, 1686, 1622, 1475, 1264, 1168, 873, 816, 778 cm<sup>-1</sup>; <sup>1</sup>H NMR (270 MHz, CDCl<sub>3</sub>): δ 0.28 (s, 6H), 1.03 (s, 9H), 7.17 (dd, *J* = 8.8, 2.2 Hz, 1H), 7.23 (d, *J* = 2.2 Hz, 1H), 7.76 (d, *J* = 8.6 Hz, 1H), 7.88–7.92 (m, 2H), 8.26 (s, 1H), 10.1 (s, 1H); <sup>13</sup>C NMR (67.9 MHz, CDCl<sub>3</sub>): δ -4.36, 18.2, 25.6, 115.1, 123.2, 127.6, 128.1, 131.2, 132.4, 134.4, 138.1, 156.5, 192.0, one peak for aromatic carbon was not found probably due to overlapping; HRMS (ESI/TOF) *m/z*: [M+H]<sup>+</sup> Calcd for C<sub>17</sub>H<sub>23</sub>O<sub>2</sub>Si 287.1467; Found 287.1463.

Preparation of (6-((*tert*-butyldimethylsilyl)oxy)naphthalen-2-yl)methyl 2,3,4,5,6-pentafluorobenzoate (**1e**):

NaBH<sub>4</sub> (182 mg, 4.80 mmol, 1.2 equiv) was added to a solution of 6-((*tert*-butyldimethylsilyl)oxy)-2-naphthaldehyde (**S3**) in MeOH (13 mL) at 0 °C. The resulting mixture was stirred for 2 h at room temperature. MeOH was removed by evaporation and the resulting mixture was transferred to a separating funnel with EtOAc and water. The aqueous phase was extracted with EtOAc (60 mL×2). The combined organic phase was washed with brine and dried over MgSO<sub>4</sub>. After removal of the solvent, alcohol **1e'** was obtained as a crude mixture and this mixture was used next step without further purification. The crude mixture and DMAP (49.0 mg, 0.40 mmol, 0.1 equiv) were placed in a round flask and refilled with N<sub>2</sub>. THF (13 mL) and triethylamine (0.8 mL, 6.00 mmol, 1.5 equiv) were added to the flask. Pentafluorobenzoyl chloride (0.6 mL, 4.40 mmol, 1.1 equiv) was added dropwise to the mixture at 0 °C. The resulting mixture was allowed to warm to room temperature and stirred for 30 min. The reaction was quenched with water and the resulting aqueous phase was extracted with EtOAc (100 mL×2). The combined organic phase was washed with brine and dried over MgSO<sub>4</sub>. After removal of the solvent, the resulting crude mixture was purified by silica gel column chromatography (Hexane/EtOAc = 97/3, 95/5) to give (6-((*tert*-butyldimethylsilyl)oxy)naphthalen-2-yl)methyl 2,3,4,5,6-pentafluorobenzoate (**1e**) as a white solid (693 mg, 1.44 mmol, 36% yield).

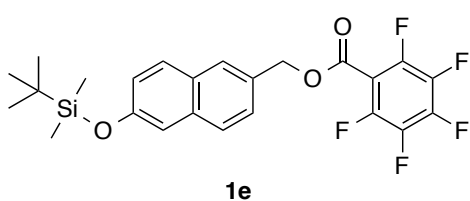

M.p. 124.4–125.4 °C; IR (KBr) 2930, 2861, 1738, 1525, 1496, 1325, 1219, 1006, 940, 834 cm<sup>-1</sup>; <sup>1</sup>H NMR (500 MHz, CDCl<sub>3</sub>): δ 0.25 (s, 6H), 1.02 (s, 9H), 5.52 (s, 2H), 7.11 (dd, *J* = 8.8, 2.4 Hz, 1H), 7.20 (d, *J* = 2.4 Hz, 1H), 7.46 (dd, *J* = 8.3, 1.3 Hz, 1H), 7.72 (d, *J* = 9.0 Hz, 1H), 7.74 (d, *J* = 9.0 Hz, 1H), 7.82 (s, 1H); <sup>13</sup>C NMR (126 MHz, CDCl<sub>3</sub>): δ -4.4, 18.2, 25.7, 68.8, 108.1 (m), 114.8, 122.7, 126.2, 127.4, 127.9, 128.8, 129.5, 129.7, 134.6, 137.6 (dm, *J*<sub>CF</sub> = 256 Hz), 143.2 (dm, *J*<sub>CF</sub> = 261 Hz), 145.4 (dm, *J*<sub>CF</sub> = 258 Hz), 154.2, 158.9; <sup>19</sup>F NMR (471 MHz, CDCl<sub>3</sub>): δ -138.7 – -138.8 (m, 2F), -149.3 (tt, *J* = 21.2, 4.7 Hz, 1F), -161.2 – -161.3 (m, 2F); HRMS (EI) *m/z*: [M]<sup>+</sup> Calcd for C<sub>24</sub>H<sub>23</sub>O<sub>3</sub>F<sub>5</sub>Si 482.1336; Found 482.1340.



**Scheme S4.** Preparation of benzyl 2,3,4,5,6-perfluorobenzoate **1g**

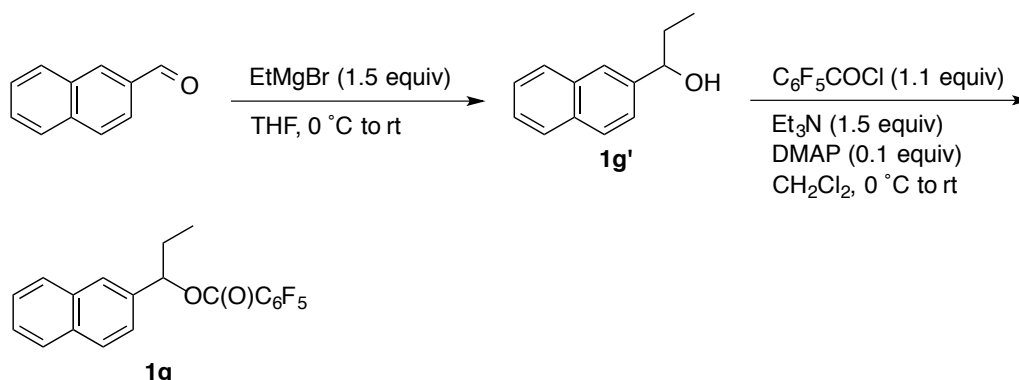

Preparation of 1-(naphthalen-2-yl)propan-1-ol (**1g'**)<sup>3</sup>:

Magnesium turnings (219 mg, 9.00 mmol) was charged into a two-necked round flask equipped with a condenser and a dropping funnel and the equipment was refilled with N<sub>2</sub>. After addition of a small amount of THF, a solution of bromoethane (818 mg, 0.58 mL, 7.50 mmol, 1.5 equiv) in THF (20 mL) was added dropwise to the mixture. The reaction mixture was cooled to room temperature and a solution of 2-naphthaldehyde (781 mg, 5.00 mmol) in THF (20 mL) was added to the mixture at 0 °C. The resulting mixture was stirred at room temperature for 2.5 h. The reaction was quenched with 1N HCl (20 mL) and the resulting aqueous phase was extracted with EtOAc (100 mL×2). The combined organic phase was washed with brine, dried over MgSO<sub>4</sub>. After removal of the solvent, the resulting crude mixture was purified by silica gel column chromatography (Hexane/EtOAc = 85/15, 4/1) to give 1-(naphthalen-2-yl)propan-1-ol (**1g'**) as a pale yellow oil (877 mg, 4.71 mmol, 94% yield).

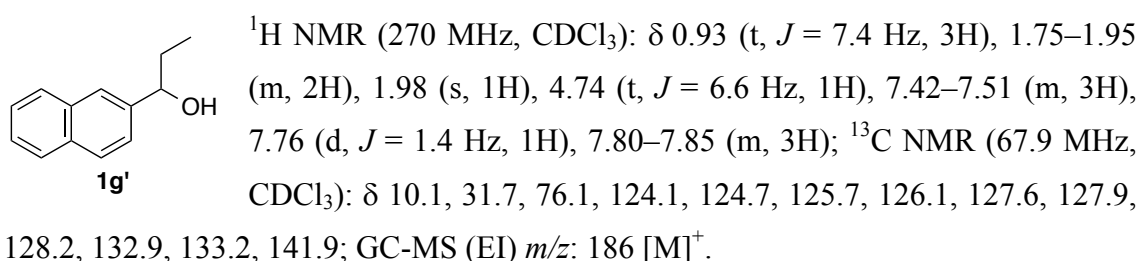

Preparation of 1-(naphthalen-2-yl)propyl 2,3,4,5,6-pentafluorobenzoate (**1g**):

1-(Naphthalen-2-yl)propan-1-ol (**1g'**) (689 mg, 3.70 mmol) and DMAP (49.0 mg, 0.40 mmol, 0.1 equiv) were placed in a round flask and refilled with N<sub>2</sub>. THF (12 mL) and

triethylamine (0.78 mL, 5.60 mmol, 1.5 equiv) were added to the flask. Pentafluorobenzoyl chloride (0.57 mL, 4.10 mmol, 1.1 equiv) was added dropwise to the mixture at 0 °C. The resulting mixture was allowed to warm to room temperature and stirred for 2 h. The reaction was quenched with water and the resulting aqueous phase was extracted with EtOAc (60 mL×3). The combined organic phase was washed with brine and dried over MgSO<sub>4</sub>. After removal of the solvent, the resulting crude mixture was purified by silica gel column chromatography (Hexane/EtOAc = 95/5, 9/1) to give 1-(naphthalen-2-yl)propyl 2,3,4,5,6-pentafluorobenzoate (**1g**) as a white solid (1.10 g, 2.89 mmol, 78% yield).

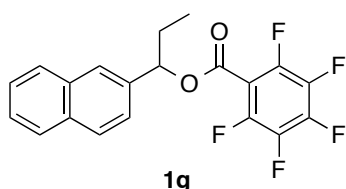

M.p. 119.0–119.8 °C; IR (KBr) 2978, 2944, 1747, 1655, 1503, 1321, 1227, 995, 957, 818, 752 cm<sup>-1</sup>; <sup>1</sup>H NMR (500 MHz, CDCl<sub>3</sub>): δ 0.99 (t, *J* = 7.5 Hz, 3H), 2.01–2.08 (m, 1H), 2.11–2.18 (m, 1H), 6.10 (t, *J* = 6.8 Hz, 1H), 7.47–7.51 (m, 3H), 7.83–7.87 (m, 4H); <sup>13</sup>C NMR (126 MHz, CDCl<sub>3</sub>): δ 9.82, 29.2, 80.7, 108.4 (m), 124.1, 126.1, 126.3 (2C), 127.7, 128.1, 128.5, 133.0, 133.2, 136.4, 137.6 (dm, *J*<sub>CF</sub> = 255 Hz), 143.1 (dm, *J*<sub>CF</sub> = 261 Hz), 145.4 (dm, *J*<sub>CF</sub> = 258 Hz), 158.4; <sup>19</sup>F NMR (471 MHz, CDCl<sub>3</sub>): δ -139.0 – -139.1 (m, 2F), -149.7 (tt, *J* = 21.2, 4.2 Hz, 1F), -161.3 – -161.4 (m, 2F); HRMS (EI) *m/z*: [M]<sup>+</sup> Calcd for C<sub>20</sub>H<sub>13</sub>O<sub>2</sub>F<sub>5</sub> 380.0835; Found 380.0835.

### 3. General procedure for the ruthenium-catalyzed benzylic substitution of benzyl esters with stabilized carbon nucleophiles

(6-Methoxynaphthalen-2-yl)methyl 2,3,4,5,6-pentafluorobenzoate (**1a**) (0.25 mmol, 95.6 mg), [Cp\*RuCl<sub>2</sub>]<sub>2</sub> (3.8 mg, 0.00625 mmol, 0.025 equiv), picolinic acid (**L1**) (1.5 mg, 0.0125 mmol, 0.05 equiv), Cs<sub>2</sub>CO<sub>3</sub> (89.6 mg, 0.275 mmol, 1.1 equiv) were charged into a screw cap vial. The resulting mixture was carefully evacuated and refilled with N<sub>2</sub> five times. After the addition of CH<sub>3</sub>CN (1 mL) and diethyl methylmalonate (**2a**) (47 μL, 0.275 mmol, 1.1 equiv), the resulting yellow suspension was stirred at 60 °C for 18 h. The reaction was allowed to cool to room temperature and quenched with water (1 mL). The resulting aqueous phase was extracted with EtOAc (3 mL×1). The organic phase was washed with brine and dried over MgSO<sub>4</sub>. After removal of the

solvent, the resulting crude mixture was purified by preparative thin-layer chromatography (Hexane/EtOAc = 4/1) to give diethyl 2-((6-methoxynaphthalen-2-yl)methyl)-2-methylmalonate (**3aa**)<sup>1</sup> as a pale yellow oil (76.8 mg, 0.223 mmol, 89% yield).

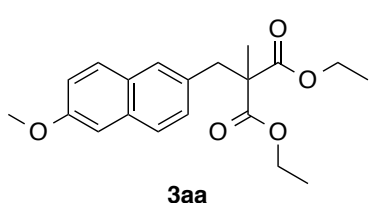

<sup>1</sup>H NMR (270 MHz, CDCl<sub>3</sub>): δ 1.26 (t, *J* = 7.1 Hz, 6H), 1.37 (s, 3H), 3.36 (s, 2H), 3.91 (s, 3H), 4.21 (q, *J* = 7.1 Hz, 4H), 7.10–7.14 (m, 2H), 7.21 (dd, *J* = 8.4, 1.9 Hz, 1H), 7.52 (s, 1H), 7.63 (d, *J* = 8.6 Hz, 1H), 7.65 (d, *J* = 8.6 Hz, 1H); <sup>13</sup>C NMR (67.9 MHz, CDCl<sub>3</sub>): δ 14.0, 19.8, 41.0, 54.9, 55.2, 61.3, 105.4, 118.7, 126.4, 128.7, 128.8 (2C), 129.0, 131.3, 133.4, 157.4, 172.0; GC-MS (EI): *m/z* 344 [M]<sup>+</sup>.

#### Diethyl 2-methyl-2-(naphthalen-2-ylmethyl)malonate (**3ba**)<sup>4</sup>

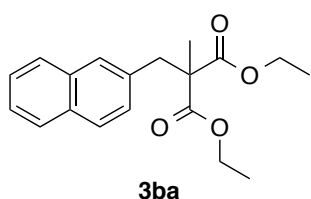

This compound was prepared according to the same method to **3aa** and the desired product was obtained after purification by preparative thin-layer chromatography (Pentane/Et<sub>2</sub>O = 95/5 × 2). Pale yellow oil (70.0 mg, 0.223 mmol, 89% yield); <sup>1</sup>H NMR (270 MHz, CDCl<sub>3</sub>): δ 1.26 (t, *J* = 7.0 Hz, 6H), 1.38 (s, 3H), 3.40 (s, 2H), 4.21 (q, *J* = 7.0 Hz, 4H), 7.25 (dd, *J* = 8.4, 1.9 Hz, 1H), 7.40–7.49 (m, 2H), 7.60 (s, 1H), 7.72–7.81 (m, 3H); <sup>13</sup>C NMR (67.9 MHz, CDCl<sub>3</sub>): δ 14.0, 19.8, 41.2, 54.9, 61.3, 125.6, 126.0, 127.5, 127.6 (2C), 128.4, 129.0, 132.4, 133.2, 133.8, 172.0; GC-MS (EI): *m/z* 314 [M]<sup>+</sup>.

#### Diethyl 2-methyl-2-((6-(pivaloyloxy)naphthalen-2-yl)methyl)malonate (**3ca**)

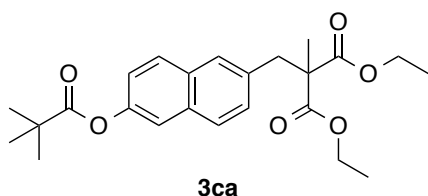

This compound was prepared according to the same method to **3aa** and the desired product was obtained after purification by preparative thin-layer chromatography (Hexane/EtOAc = 9/1 × 3). White solid (84.1 mg, 0.203 mmol, 81% yield); M.p. 80.5–82.3 °C; IR (KBr) 2983, 2940, 1749, 1731, 1607, 1466, 1286, 1187, 1107, 908 cm<sup>-1</sup>; <sup>1</sup>H NMR (270 MHz, CDCl<sub>3</sub>): δ 1.25 (t, *J* = 7.1 Hz, 6H), 1.37 (s, 3H), 1.40 (s, 9H), 3.38 (s, 2H), 4.20 (q, *J* = 7.1 Hz, 4H), 7.16 (dd, *J* = 8.8, 2.0 Hz, 1H), 7.26 (dd, *J* = 8.4,

1.6 Hz, 2H), 7.47 (d, 1H), 7.59 (s, 1H), 7.68 (d,  $J = 8.6$  Hz) 7.76 (d,  $J = 8.9$  Hz, 1H), 7.74 (d,  $J = 20.3$  Hz, 1H);  $^{13}\text{C}$  NMR (67.9 MHz,  $\text{CDCl}_3$ ):  $\delta$  14.0, 19.8, 27.1, 39.1, 41.1, 54.9, 61.3, 118.1, 121.3, 127.3, 128.8, 128.9, 129.0, 131.1, 132.7, 133.6, 148.6, 171.9, 177.2; HRMS (ESI/TOF)  $[\text{M}+\text{Na}]^+$  Calcd for  $\text{C}_{24}\text{H}_{30}\text{O}_6\text{Na}$  437.1940; Found 437.1934.

Diethyl 2-((6-((*tert*-butoxycarbonyl)oxy)naphthalen-2-yl)methyl)-2-methylmalonate (**3da**)

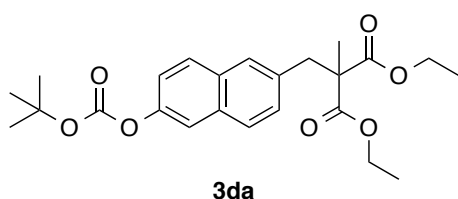

This compound was prepared according to the same method to **3aa** and the desired product was obtained after purification by preparative thin-layer chromatography (Hexane/EtOAc = Hexane/EtOAc = 9/1  $\times$  2). Pale yellow oil (102

mg, 0.237 mmol, 95% yield); IR (neat) 2983, 2938, 1732, 1607, 1508, 1463, 1371, 1246, 1021, 899, 862, 813, 781  $\text{cm}^{-1}$ ;  $^1\text{H}$  NMR (270 MHz,  $\text{CDCl}_3$ ):  $\delta$  1.25 (t,  $J = 7.2$  Hz, 6H), 1.37 (s, 3H), 1.58 (s, 9H), 3.38 (s, 2H), 4.20 (q,  $J = 7.2$  Hz, 4H), 7.26 (dd,  $J = 8.6$ , 1.6 Hz, 1H), 7.28 (dd,  $J = 8.8$ , 2.3 Hz, 1H), 7.59–7.59 (m, 2H), 7.76 (d,  $J = 8.6$  Hz, 1H), 7.76 (d,  $J = 8.6$  Hz, 1H);  $^{13}\text{C}$  NMR (67.9 MHz,  $\text{CDCl}_3$ ):  $\delta$  14.0, 19.8, 27.7, 41.1, 54.9, 61.3, 83.6, 117.9, 121.0, 127.4, 128.8, 129.0, 129.1, 131.2, 132.6, 133.7, 148.5, 151.9, 171.9; HRMS (ESI/TOF)  $[\text{M}+\text{Na}]^+$  Calcd for  $\text{C}_{24}\text{H}_{30}\text{O}_7\text{Na}$  453.1889; Found 453.1886.

Diethyl 2-((6-((*tert*-butyldimethylsilyl)oxy)naphthalen-2-yl)methyl)-2-methylmalonate (**3ea**)

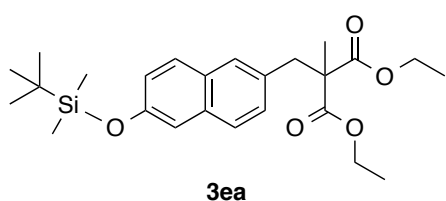

This compound was prepared according to the same method to **3aa** and the desired product was obtained after purification by preparative thin-layer chromatography (Hexane/EtOAc = 9/1  $\times$  3). Pale yellow oil (44.7 mg, 0.101 mmol, 40% yield); IR

(neat) 2933, 2858, 1733, 1604, 1473, 1376, 1245, 1022, 976, 937, 781  $\text{cm}^{-1}$ ;  $^1\text{H}$  NMR (270 MHz,  $\text{CDCl}_3$ ):  $\delta$  0.22–0.25 (m, 6H), 0.99–1.03 (m, 9H), 1.25 (t,  $J = 7.1$  Hz, 6H), 1.38 (s, 3H), 3.35 (s, 2H), 4.21 (q,  $J = 7.1$  Hz, 4H), 7.04 (dd,  $J = 8.8$ , 2.6 Hz, 1H), 7.14 (d,  $J = 2.2$  Hz, 1H), 7.18 (dd,  $J = 8.6$ , 1.8 Hz, 1H), 7.51 (s, 1H), 7.58 (d,  $J = 8.6$  Hz, 1H), 7.63 (d,  $J = 8.8$  Hz, 1H);  $^{13}\text{C}$  NMR (67.9 MHz,  $\text{CDCl}_3$ ):  $\delta$  -4.37, 14.0, 18.2, 19.8, 25.7, 41.1, 55.0, 61.3, 114.6, 122.2, 126.4, 128.6, 128.7, 129.0, 129.1, 131.5, 133.5, 153.3,

172.0; HRMS (ESI/TOF)  $[M+Na]^+$  Calcd for  $C_{25}H_{36}O_5SiNa$  467.2230; Found 467.2224.

Diethyl 2-methyl-2-(1-(naphthalen-2-yl)ethyl)malonate (**3fa**)<sup>1</sup>

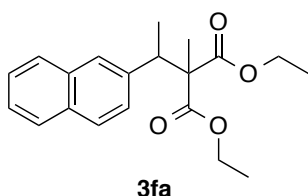

This compound was prepared according to the same method to **3aa** and the desired product was obtained after purification by silica gel column chromatography (Hexane/EtOAc = 99/1, 96/4, 94/6, 92/8) and preparative thin-layer chromatography (Toluene/ EtOAc = 9/1). Pale yellow oil (65.7 mg, 0.200

mmol, 80% yield); <sup>1</sup>H NMR (270 MHz, CDCl<sub>3</sub>): δ 1.14 (t, *J* = 7.0 Hz, 3H), 1.27 (t, *J* = 7.3 Hz, 3H), 1.42 (s, 3H), 1.49 (d, *J* = 7.1 Hz, 3H), 3.86 (q, *J* = 7.1 Hz, 1H), 4.04 (q, *J* = 7.1 Hz, 2H), 4.19–4.28 (m, 2H), 7.37 (dd, *J* = 8.4, 1.9 Hz, 1H), 7.40–7.47 (m, 2H), 7.68 (d, *J* = 1.4 Hz, 1H), 7.73–7.81 (m, 3H); <sup>13</sup>C NMR (67.9 MHz, CDCl<sub>3</sub>): δ 13.8, 14.0, 17.2, 17.3, 43.9, 58.4, 61.1, 61.2, 125.5, 125.8, 127.1, 127.4 (2C), 127.7, 127.9, 132.5, 133.1, 139.2, 171.4, 171.5; GC-MS (EI): *m/z* 328 [M]<sup>+</sup>.

Diethyl 2-(1-(6-methoxynaphthalen-2-yl)ethyl)-2-methylmalonate (**3ha**)

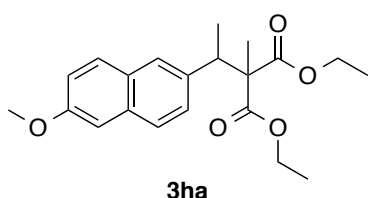

This compound was prepared according to the same method to **3aa** and the desired product was obtained after purification by preparative thin-layer chromatography (Pentane/Et<sub>2</sub>O = 9/1 × 2). Pale yellow oil (74.5 mg, 0.208 mmol, 83% yield); IR (neat) 2976, 2841, 1747,

1633, 1607, 1455, 1393, 1216, 852, 811 cm<sup>-1</sup>; <sup>1</sup>H NMR (270 MHz, CDCl<sub>3</sub>): δ 1.14 (t, *J* = 7.0 Hz, 3H), 1.27 (t, *J* = 7.3 Hz, 3H), 1.41 (s, 3H), 1.47 (d, *J* = 7.2 Hz, 3H), 3.82 (q, *J* = 7.2 Hz, 1H), 3.91 (s, 3H), 4.03 (q, *J* = 7.0 Hz, 2H), 4.17–4.28 (m, 2H), 7.09–7.14 (m, 2H), 7.33 (dd, *J* = 8.2, 1.8 Hz, 1H), 7.60 (d, *J* = 1.4 Hz, 1H), 7.62–7.68 (m, 2H); <sup>13</sup>C NMR (67.9 MHz, CDCl<sub>3</sub>): δ 13.9, 14.0, 17.2, 17.3, 43.7, 55.2, 58.4, 61.1, 61.2, 105.4, 118.7, 126.2, 127.6, 127.7, 128.6, 129.2, 133.5, 136.8, 157.4, 171.4, 171.5; HRMS (ESI/TOF)  $[M+Na]^+$  Calcd for  $C_{21}H_{26}O_5Na$  381.1678; Found 381.1672.

Diethyl 2-butyl-2-((6-methoxynaphthalen-2-yl)methyl)malonate (**3ab**)

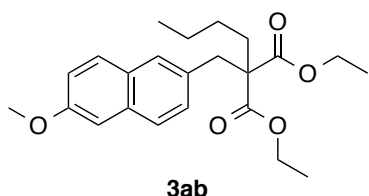

This compound was prepared according to the same method to **3aa** and the desired product was obtained after purification by preparative thin-layer chromatography (Hexane/EtOAc = 9/1 × 2). Pale yellow oil (77.9 mg, 0.202 mmol, 81% yield); IR (neat) 2959, 2871, 1732, 1606, 1485, 1203, 1033, 856, 757  $\text{cm}^{-1}$ ;  $^1\text{H}$  NMR (270 MHz,  $\text{CDCl}_3$ ):  $\delta$  0.92 (t,  $J$  = 6.8 Hz, 3H), 1.23 (t,  $J$  = 7.3 Hz, 6H), 1.28–1.37 (m, 4H), 1.77–1.83 (m, 2H), 3.37 (s, 2H), 3.90 (s, 3H), 4.11–4.27 (m, 4H), 7.08–7.13 (m, 2H), 7.16 (dd,  $J$  = 8.6, 1.2 Hz, 1H), 7.47 (d,  $J$  = 1.2 Hz, 1H), 7.62 (d,  $J$  = 8.1 Hz, 1H), 7.63 (d,  $J$  = 8.9 Hz, 1H);  $^{13}\text{C}$  NMR (67.9 MHz,  $\text{CDCl}_3$ ):  $\delta$  13.9, 14.0, 22.8, 26.3, 31.5, 37.9, 55.2, 58.9, 61.1, 105.4, 118.7, 126.5, 128.5 (2C), 128.8, 129.0, 131.5, 133.4, 157.4, 171.4; HRMS (ESI/TOF)  $m/z$ :  $[\text{M}+\text{Na}]^+$  Calcd for  $\text{C}_{23}\text{H}_{30}\text{O}_5\text{Na}$  409.1991; Found 409.1977.

Diethyl 2-allyl-2-((6-methoxynaphthalen-2-yl)methyl)malonate (**3ac**)

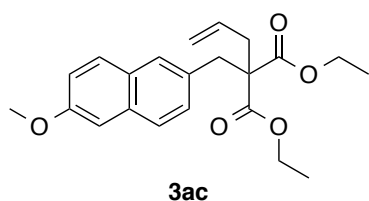

This compound was prepared according to the same method to **3aa** and the desired product was obtained after purification by preparative thin-layer chromatography (Hexane/EtOAc = 88/15). Colorless oil (74.3 mg, 0.201 mmol, 80% yield); IR (neat) 3060, 2980, 2938, 1732, 1606, 1207, 1034, 856, 757  $\text{cm}^{-1}$ ;  $^1\text{H}$  NMR (270 MHz,  $\text{CDCl}_3$ ):  $\delta$  1.24 (t,  $J$  = 7.2 Hz, 6H), 2.60 (d,  $J$  = 7.3 Hz, 2H), 3.37 (s, 2H), 3.91 (s, 3H), 4.11–4.27 (m, 4H), 5.14–5.17 (m, 1H), 5.20–5.21 (m, 1H), 5.75–5.90 (m, 1H), 7.08–7.14 (m, 2H), 7.19 (dd,  $J$  = 8.5, 1.8 Hz, 1H), 7.51 (s, 1H), 7.63 (d,  $J$  = 8.4 Hz, 1H), 7.64 (d,  $J$  = 8.4 Hz, 1H);  $^{13}\text{C}$  NMR (67.9 MHz,  $\text{CDCl}_3$ ):  $\delta$  14.0, 36.6, 38.0, 52.2, 58.9, 61.2, 105.5, 118.8, 119.2, 126.6, 128.6, 128.7, 128.8, 129.0, 131.2, 132.7, 133.5, 157.5, 170.8; HRMS (ESI/TOF)  $m/z$ :  $[\text{M}+\text{Na}]^+$  Calcd for  $\text{C}_{22}\text{H}_{26}\text{O}_5\text{Na}$  393.1678; Found 393.1679.

Diethyl 2-(2-cyanoethyl)-2-((6-methoxynaphthalen-2-yl)methyl)malonate (**3ad**)

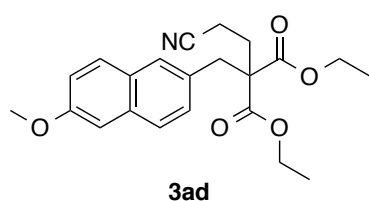

This compound was prepared according to the same method to **3aa** and the desired product was obtained after purification by silica gel column chromatography

(Hexane/EtOAc = 9/1, 4/1, 7/3) and preparative thin-layer chromatography (Toluene/EtOAc= 9/1×2). Pale yellow oil (95.5 mg, 0.249 mmol, >99% yield); IR (neat) 2981, 2906, 2249, 1730, 1606, 1485, 1120, 1028, 858, 759  $\text{cm}^{-1}$ ;  $^1\text{H}$  NMR (270 MHz,  $\text{CDCl}_3$ ):  $\delta$  1.28 (t,  $J = 7.2$  Hz, 6H), 2.13–2.19 (m, 2H), 2.44–2.50 (m, 2H), 3.40 (s, 2H), 3.92 (s, 3H), 4.25 (q,  $J = 7.2$  Hz, 4H), 7.09–7.16 (m, 3H), 7.48 (d,  $J = 0.81$  Hz, 1H), 7.65 (d,  $J = 8.6$  Hz, 2H);  $^{13}\text{C}$  NMR (67.9 MHz,  $\text{CDCl}_3$ ):  $\delta$  13.1, 13.9, 28.8, 39.5, 55.2, 57.8, 61.8, 105.4, 119.0, 119.1, 126.9, 128.1, 128.6, 128.7, 129.0, 129.9, 133.6, 157.6, 170.0; HRMS (ESI/TOF)  $m/z$ :  $[\text{M}+\text{Na}]^+$  Calcd for  $\text{C}_{22}\text{H}_{25}\text{NO}_5\text{Na}$  406.1630; Found 406.1630.

#### Diethyl 2-(3-chloropropyl)-2-((6-methoxynaphthalen-2-yl)methyl)malonate (**3ae**)

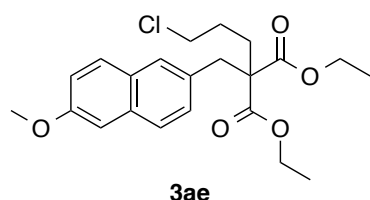

This compound was prepared according to the same method to **3aa** and the desired product was obtained after purification by preparative thin-layer chromatography (Hexane/EtOAc = 9/1×3). Pale yellow oil (95.3 mg, 0.234 mmol, 93% yield); IR (neat) 2979, 2905, 1731, 1606, 1485, 1267, 1030, 857, 758  $\text{cm}^{-1}$ ;  $^1\text{H}$  NMR (270 MHz,  $\text{CDCl}_3$ ):  $\delta$  1.25 (t,  $J = 7.0$  Hz, 6H), 1.78–1.89 (m, 2H), 1.91–1.99 (m, 2H), 3.38 (s, 2H), 3.52 (t,  $J = 6.1$  Hz, 2H), 3.91 (s, 3H), 4.15–4.26 (m 4H), 7.09 (d,  $J = 2.4$  Hz, 1H), 7.12 (dd,  $J = 8.6, 2.4$  Hz, 1H), 7.17 (dd,  $J = 8.5, 1.6$  Hz, 1H), 7.50 (d,  $J = 1.6$  Hz, 1H), 7.63 (d,  $J = 8.6$  Hz, 1H), 7.65 (d,  $J = 8.9$  Hz, 1H);  $^{13}\text{C}$  NMR (67.9 MHz,  $\text{CDCl}_3$ ):  $\delta$  14.0, 27.7, 29.6, 38.3, 44.7, 55.2, 58.5, 61.3, 105.4, 118.9, 126.7, 128.4, 128.5, 128.7, 129.0, 130.9, 133.5, 157.5, 171.0; HRMS (ESI/TOF)  $m/z$ :  $[\text{M}+\text{Na}]^+$  Calcd for  $\text{C}_{22}\text{H}_{27}\text{O}_5\text{ClNa}$  429.1445; Found 429.1442.

#### Diethyl 2-((6-methoxynaphthalen-2-yl)methyl)-2-(3-oxobutyl)malonate (**3af**)

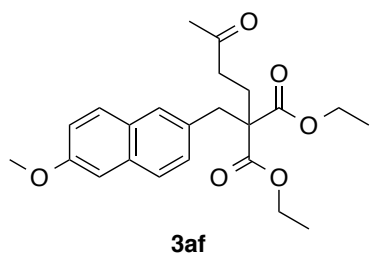

This compound was prepared according to the same method to **3aa** and the desired product was obtained after purification by silica gel column chromatography (Hexane/EtOAc = 85/15, 7/3) and preparative thin-layer chromatography (Toluene/EtOAc = 4/1×3). Colorless oil (84.8 mg, 0.212 mmol, 85% yield); IR (neat) 2980, 2905, 1731, 1606, 1485, 1175, 1030, 858, 757  $\text{cm}^{-1}$ ;  $^1\text{H}$  NMR (270 MHz,  $\text{CDCl}_3$ ):  $\delta$  1.24 (t,  $J = 7.1$  Hz, 6H), 2.08–2.14 (m, 5H), 2.50–2.56 (m, 2H), 3.37 (s, 2H), 3.90 (s,

3H), 4.18 (q,  $J = 7.1$  Hz, 4H), 7.08 (d,  $J = 2.6$  Hz, 1H), 7.12 (dd,  $J = 8.9, 2.6$  Hz, 1H), 7.17 (dd,  $J = 8.5, 1.6$  Hz, 1H), 7.49 (d,  $J = 1.6$  Hz, 1H), 7.63 (d,  $J = 8.4$  Hz, 1H), 7.64 (d,  $J = 8.9$  Hz, 1H);  $^{13}\text{C}$  NMR (67.9 MHz,  $\text{CDCl}_3$ ):  $\delta$  13.9, 26.4, 29.8, 38.8, 39.3, 55.2, 58.1, 61.3, 105.4, 118.8, 126.7, 128.4, 128.6, 128.7, 129.0, 130.8, 133.5, 157.5, 170.9, 207.2; HRMS (ESI/TOF)  $m/z$ :  $[\text{M}+\text{Na}]^+$  Calcd for  $\text{C}_{23}\text{H}_{28}\text{O}_6\text{Na}$  423.1784; Found 423.1783.

#### Diethyl 2-benzyl-2-((6-methoxynaphthalen-2-yl)methyl)malonate (**3ag**)

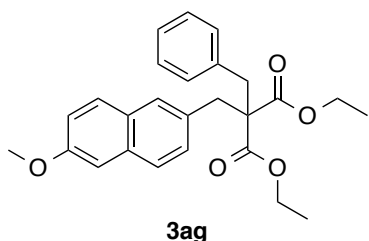

This compound was prepared according to the same method to **3aa** and the desired product was obtained after purification by preparative thin-layer chromatography (Hexane/EtOAc = 9/1  $\times$  2). Pale yellow oil (95.7 mg, 0.228 mmol, 91% yield); IR (neat) 3030, 2980, 2938, 2904, 1730, 1606, 1485, 1265, 1034, 857, 756, 702  $\text{cm}^{-1}$ ;  $^1\text{H}$  NMR (270 MHz,  $\text{CDCl}_3$ ):  $\delta$  1.14 (t,  $J = 7.2$  Hz, 6H), 3.27 (s, 2H), 3.35 (s, 2H), 3.91 (s, 3H), 4.11 (q,  $J = 7.2$  Hz, 4H), 7.09–7.14 (m, 2H), 7.18–7.21 (m, 2H), 7.24–7.32 (m, 4H), 7.55 (d,  $J = 1.4$  Hz, 1H), 7.64 (d,  $J = 8.6$  Hz, 1H), 7.65 (d,  $J = 8.4$  Hz, 1H);  $^{13}\text{C}$  NMR (67.9 MHz,  $\text{CDCl}_3$ ):  $\delta$  13.8, 39.1, 39.2, 55.2, 60.2, 61.2, 105.4, 118.8, 126.5, 126.8, 128.1, 128.7, 128.8, 129.1, 130.1, 131.4, 133.4, 136.3, 157.4, 171.0, one peak for aromatic carbon was not found probably due to overlapping; HRMS (ESI/TOF)  $m/z$ :  $[\text{M}+\text{Na}]^+$  Calcd for  $\text{C}_{26}\text{H}_{28}\text{O}_5\text{Na}$  443.1834; Found 443.1830.

#### Diethyl 2-isobutyl-2-((6-methoxynaphthalen-2-yl)methyl)malonate (**3ah**)

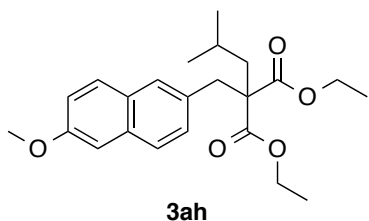

This compound was prepared according to the same method to **3aa** and the desired product was obtained after purification by preparative thin-layer chromatography (Hexane/EtOAc = 9/1  $\times$  2). Colorless oil (71.9 mg, 0.186 mmol, 75% yield); IR (neat) 2958, 2871, 1731, 1606, 1229, 1126, 1035, 856  $\text{cm}^{-1}$ ;  $^1\text{H}$  NMR (270 MHz,  $\text{CDCl}_3$ ):  $\delta$  0.91 (d,  $J = 6.8$  Hz, 6H), 1.22 (t,  $J = 7.1$  Hz, 6H), 1.79 (d,  $J = 5.9$  Hz, 2H), 1.86–2.00 (m, 1H), 3.41 (s, 2H), 3.90 (s, 3H), 4.16 (q,  $J = 7.1$  Hz, 4H), 7.08–7.13 (m, 2H), 7.18 (dd,  $J = 8.5, 1.6$  Hz, 1H), 7.48 (d,  $J = 1.6$  Hz, 1H), 7.62 (d,  $J = 8.1$  Hz, 1H), 7.63 (d,  $J = 8.6$  Hz, 1H);  $^{13}\text{C}$  NMR (67.9 MHz,  $\text{CDCl}_3$ ):  $\delta$  13.9, 23.6, 24.0, 38.7, 40.8, 55.2, 58.3, 61.0, 105.4, 118.7, 126.5,



128.6 (2C), 128.8, 129.0, 131.5, 133.4, 157.4, 171.8; HRMS (ESI/TOF)  $m/z$ :  $[M+Na]^+$   
Calcd for  $C_{23}H_{30}O_5Na$  409.1991; Found 409.1986.

#### Diethyl 2-((6-methoxynaphthalen-2-yl)methyl)-2-phenylmalonate (**3ai**)

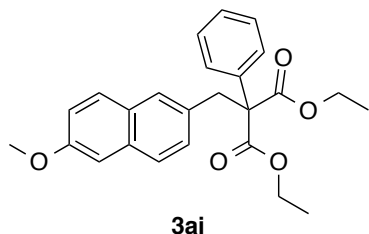

This compound was prepared according to the same method to **3aa** and the desired product was obtained after purification by preparative thin-layer chromatography (Pentane/EtOAc = 9/1 and Toluene/EtOAc = 19/1  $\times$  2). Pale yellow oil (98.9 mg, 0.243 mmol, 97% yield); IR (neat) 3059, 2980, 2904, 1738, 1606, 1484, 1228, 1033, 857, 755  $cm^{-1}$ ;  $^1H$  NMR (270 MHz,  $CDCl_3$ ):  $\delta$  1.20 (t,  $J$  = 7.1 Hz, 6H), 3.73 (s, 2H), 3.89 (s, 3H), 4.21 (q,  $J$  = 7.1 Hz, 4H), 6.95 (dd,  $J$  = 8.4, 1.6 Hz, 1H), 7.05–7.09 (m, 2H), 7.23–7.29 (m, 6H), 7.50 (d,  $J$  = 8.1 Hz, 1H), 7.53 (d,  $J$  = 7.8 Hz, 1H);  $^{13}C$  NMR (67.9 MHz,  $CDCl_3$ ):  $\delta$  13.8, 42.9, 55.1, 61.5, 64.4, 105.3, 118.5, 125.9, 127.4, 127.8, 128.3, 128.5, 129.1 (2C), 129.2, 131.2, 133.3, 137.0, 157.4, 170.1; HRMS (ESI/TOF)  $m/z$ :  $[M+Na]^+$  Calcd for  $C_{25}H_{26}O_5Na$  429.1678; Found 429.1677.

#### Diethyl 2-acetamido-2-((6-methoxynaphthalen-2-yl)methyl)malonate (**3aj**)

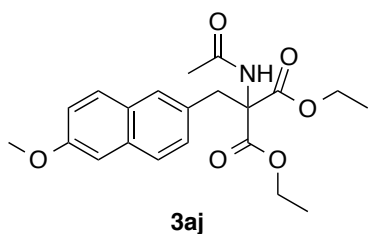

This compound was prepared according to the same method to **3aa** and the desired product was obtained after purification by preparative thin-layer chromatography (Hexane/EtOAc = 1/1  $\times$  2). White solid (88.8 mg, 0.229 mmol, 91% yield); M.p. 136.7–137.9  $^{\circ}C$ ; IR (KBr) 3266, 3048, 2986, 2941, 1747, 1644, 1515, 1187, 1030, 848, 667, 612  $cm^{-1}$ ;  $^1H$  NMR (270 MHz,  $CDCl_3$ ):  $\delta$  1.31 (t,  $J$  = 7.2 Hz, 6H), 2.04 (s, 3H), 3.78 (s, 2H), 3.91 (s, 3H), 4.29 (q,  $J$  = 7.2 Hz, 4H), 6.52 (brs, 1H), 7.06–7.14 (m, 3H), 7.40 (d,  $J$  = 0.81 Hz, 1H), 7.62 (d,  $J$  = 8.6 Hz, 2H);  $^{13}C$  NMR (67.9 MHz,  $CDCl_3$ ):  $\delta$  13.9, 22.9, 37.7, 55.2, 62.5, 67.3, 105.4, 118.9, 126.6, 128.2, 128.5, 128.7, 128.9, 130.2, 133.5, 157.5, 167.5, 169.1; HRMS (ESI/TOF)  $m/z$ :  $[M+Na]^+$  Calcd for  $C_{21}H_{25}NO_6Na$  410.1580; Found 410.1580.

### Diethyl 2-fluoro-2-((6-methoxynaphthalen-2-yl)methyl)malonate (**3ak**)

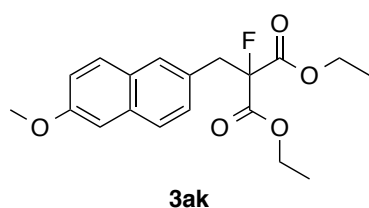

This compound was prepared according to the same method to **3aa** and the desired product was obtained after purification by preparative thin-layer chromatography (Hexane/EtOAc = 9/1 × 3). Yellow oil (35.3 mg, 0.101 mmol, 40% yield); IR (neat) 2983, 2939, 1751, 1608, 1485, 1250, 1045, 857  $\text{cm}^{-1}$ ;  $^1\text{H}$  NMR (270 MHz,  $\text{CDCl}_3$ ):  $\delta$  1.23 (t,  $J = 7.1$  Hz, 6H), 3.60 (d,  $J_{\text{HF}} = 25.7$  Hz, 2H), 3.91 (s, 3H), 4.24 (q,  $J = 7.1$  Hz, 4H), 7.09–7.15 (m, 2H), 7.32–7.36 (m, 1H), 7.65–7.69 (m, 3H);  $^{13}\text{C}$  NMR (67.9 MHz,  $\text{CDCl}_3$ ):  $\delta$  13.9, 40.2 (d,  $J_{\text{CF}} = 20.6$  Hz), 55.2, 62.6, 94.8 (d,  $J_{\text{CF}} = 202$  Hz), 105.5, 118.9, 126.8, 128.1, 128.7 (2C), 129.1 (d,  $J_{\text{CF}} = 1.1$  Hz), 129.2, 133.8, 157.7, 165.8 (d,  $J_{\text{CF}} = 25.1$  Hz);  $^{19}\text{F}$  NMR (471 MHz,  $\text{CDCl}_3$ ):  $\delta$  -165.4 (t,  $J_{\text{HF}} = 25.7$  Hz); HRMS (ESI/TOF)  $m/z$ :  $[\text{M}+\text{Na}^+]$  Calcd for  $\text{C}_{19}\text{H}_{21}\text{FO}_5\text{Na}$  371.1271; Found 371.1278.

### Dimethyl 2-((6-methoxynaphthalen-2-yl)methyl)-2-methylmalonate (**3al**)

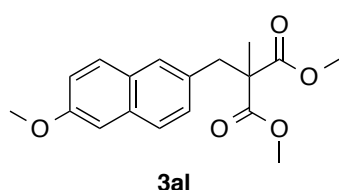

This compound was prepared according to the same method to **3aa** and the desired product was obtained after purification by preparative thin-layer chromatography (Toluene/EtOAc = 9/1 × 2). White solid (69.5 mg, 0.220 mmol, 88% yield); M.p. 118.0–118.8 °C; IR (KBr) 2990, 2940, 2845, 1733, 1604, 1441, 1232, 1113, 1027, 858, 678  $\text{cm}^{-1}$ ;  $^1\text{H}$  NMR (270 MHz,  $\text{CDCl}_3$ ):  $\delta$  1.39 (s, 3H), 3.36 (s, 2H), 3.74 (s, 6H), 3.91 (s, 3H), 7.09–7.14 (m, 2H), 7.18 (dd,  $J = 8.2, 1.6$  Hz, 1H), 7.50 (d,  $J = 1.6$  Hz, 1H), 7.63 (d,  $J = 7.8$  Hz, 1H), 7.66 (d,  $J = 8.1$  Hz, 1H);  $^{13}\text{C}$  NMR (67.9 MHz,  $\text{CDCl}_3$ ):  $\delta$  19.8, 41.2, 52.5, 55.0, 55.2, 105.4, 118.8, 126.5, 128.7 (2C), 129.1, 131.1, 133.5, 157.5, 172.4. one peak for the aromatic carbon was not found probably due to overlapping; HRMS (ESI/TOF)  $m/z$ :  $[\text{M}+\text{Na}]^+$  Calcd for  $\text{C}_{18}\text{H}_{20}\text{O}_5\text{Na}$  339.1208; Found 339.1210.

### Diisopropyl 2-((6-methoxynaphthalen-2-yl)methyl)-2-methylmalonate (**3am**)

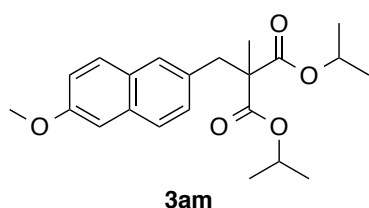

This compound was prepared according to the same method to **3aa** and the desired product was obtained after purification by preparative thin-layer

chromatography (Hexane/EtOAc = 9/1 × 2). Pale yellow oil (68.0 mg, 0.183 mmol, 73% yield); IR (neat) 2981, 2938, 1727, 1607, 1485, 1247, 1097, 1033, 854, 757  $\text{cm}^{-1}$ ;  $^1\text{H}$  NMR (270 MHz,  $\text{CDCl}_3$ ):  $\delta$  1.22 (d,  $J = 6.2$  Hz, 6H), 1.27 (d,  $J = 6.2$  Hz, 6H), 1.35 (s, 3H), 3.34 (s, 2H), 3.90 (s, 3H), 5.06 (sep,  $J = 6.2$  Hz, 2H), 7.09–7.13 (m, 2H), 7.23 (dd,  $J = 8.6, 1.6$  Hz, 1H), 7.53 (s, 1H), 7.62 (d,  $J = 8.4$  Hz, 1H), 7.64 (d,  $J = 8.4$  Hz, 1H);  $^{13}\text{C}$  NMR (67.9 MHz,  $\text{CDCl}_3$ ):  $\delta$  19.8, 21.5, 21.6, 40.8, 54.9, 55.2, 68.8, 105.5, 118.7, 126.4, 128.7, 128.8, 129.0 (2C), 131.5, 133.4, 157.4, 171.5; HRMS (ESI/TOF)  $m/z$ :  $[\text{M}+\text{Na}]^+$  Calcd for  $\text{C}_{22}\text{H}_{28}\text{O}_5\text{Na}$  395.1834; Found 395.1844.

#### Ethyl 2-((6-methoxynaphthalen-2-yl)methyl)-2-methyl-3-oxobutanoate (**5aa**)

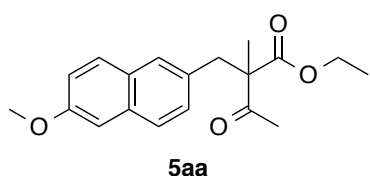

This compound was prepared according to the same method to **3aa** and the desired product was obtained after purification by silica gel column chromatography (Hexane/EtOAc = 95/5, 9/1, 85/15). Pale yellow oil (70.4 mg, 0.224 mmol, 90% yield); IR (neat) 2982, 2938, 1712, 1606, 1484, 1231, 1095, 1030, 856, 757  $\text{cm}^{-1}$ ;  $^1\text{H}$  NMR (270 MHz,  $\text{CDCl}_3$ ):  $\delta$  1.25 (t,  $J = 7.2$  Hz, 3H), 1.32 (s, 3H), 2.18 (s, 3H), 3.18 (d,  $J = 13.8$  Hz, 1H), 3.40 (d,  $J = 13.8$  Hz, 1H), 3.91 (s, 3H), 4.14–4.27 (m, 2H), 7.09–7.14 (m, 2H), 7.18 (dd,  $J = 8.5, 1.6$  Hz, 1H), 7.49 (d,  $J = 1.6$  Hz, 1H), 7.63 (d,  $J = 8.1$  Hz, 1H), 7.65 (d,  $J = 8.9$  Hz, 1H);  $^{13}\text{C}$  NMR (67.9 MHz,  $\text{CDCl}_3$ ):  $\delta$  13.9, 19.1, 26.5, 40.4, 55.2, 60.9, 61.4, 105.4, 118.8, 126.5, 128.7 (2C), 128.8, 129.0, 131.5, 133.4, 157.4, 172.4, 205.5; HRMS (ESI/TOF)  $m/z$ :  $[\text{M}+\text{Na}]^+$  Calcd for  $\text{C}_{19}\text{H}_{22}\text{O}_4\text{Na}$  337.1416; Found 337.1404.

#### Methyl 1-((6-methoxynaphthalen-2-yl)methyl)-2-oxocyclopentanecarboxylate (**5ab**)

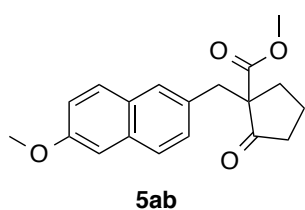

This compound was prepared according to the same method to **3aa** and the desired product was obtained after purification by preparative thin-layer chromatography (Toluene/EtOAc = 9/1). Light brown solid (76.8 mg, 0.246 mmol, 98% yield); M.p. 92.7–94.4  $^{\circ}\text{C}$ ; IR (KBr) 2963, 2946, 2896, 1748, 1720, 1605, 1487, 1230, 1198, 1024, 850, 822  $\text{cm}^{-1}$ ;  $^1\text{H}$  NMR (270 MHz,  $\text{CDCl}_3$ ):  $\delta$  1.51–1.65 (m, 1H), 1.79–1.93 (m, 1H), 1.95–2.09 (m, 2H), 2.32–2.48 (m, 2H), 3.27 (d,  $J = 13.8$  Hz, 1H), 3.33 (d,  $J = 13.8$  Hz, 1H), 3.74 (s, 3H), 3.91 (s, 3H), 7.10 (d,  $J = 2.4$  Hz, 1H), 7.13 (dd,  $J = 8.8, 2.4$  Hz, 1H), 7.21 (dd,  $J = 8.4, 1.9$  Hz, 1H), 7.52 (s, 1H), 7.64 (d,

$J = 9.2$  Hz, 1H), 7.67 (d,  $J = 9.5$  Hz, 1H);  $^{13}\text{C}$  NMR (67.9 MHz,  $\text{CDCl}_3$ ):  $\delta$  19.4, 31.6, 38.3, 39.0, 52.6, 55.2, 61.6, 105.4, 118.9, 126.8, 128.7 (3C), 129.1, 131.6, 133.3, 157.5, 171.4, 215.0; HRMS (ESI/TOF)  $m/z$ :  $[\text{M}+\text{Na}]^+$  Calcd for  $\text{C}_{19}\text{H}_{20}\text{O}_4\text{Na}$  335.1259; Found 335.1250.

#### Ethyl 1-((6-methoxynaphthalen-2-yl)methyl)-2-oxocyclohexanecarboxylate (**5ac**)

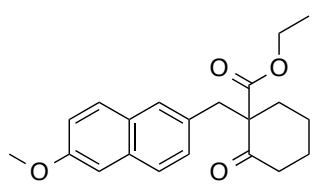

**5ac**

This compound was prepared according to the same method to **3aa** and the desired product was obtained after purification by preparative thin-layer chromatography (Toluene/EtOAc = 9/1  $\times$  2). White solid (62.9 mg, 0.185 mmol, 74% yield); M.p. 81.0–83.0 °C; IR (KBr) 2939, 2862, 1735, 1710, 1606, 1487, 1185, 1125, 1030, 855, 830  $\text{cm}^{-1}$ ;  $^1\text{H}$  NMR (270 MHz,  $\text{CDCl}_3$ ):  $\delta$  1.14 (t,  $J = 7.2$  Hz, 3H), 1.44–1.77 (m, 4H), 1.96–2.06 (m, 1H), 2.37–2.55 (m, 3H), 3.03 (d,  $J = 13.9$  Hz, 1H), 3.42 (d,  $J = 13.9$  Hz, 1H), 3.91 (s, 3H), 4.00–4.17 (m, 2H), 7.09–7.13 (m, 2H), 7.23 (dd,  $J = 8.4, 1.4$  Hz, 1H), 7.50 (d,  $J = 1.4$  Hz, 1H), 7.61 (d,  $J = 8.9$  Hz, 1H), 7.65 (d,  $J = 9.5$  Hz, 1H);  $^{13}\text{C}$  NMR (67.9 MHz,  $\text{CDCl}_3$ ):  $\delta$  13.9, 22.5, 27.5, 35.9, 40.3, 41.2, 55.2, 61.2, 62.3, 105.4, 118.6, 126.2, 128.7, 128.8, 129.0, 129.1, 131.8, 133.3, 157.3, 171.1, 207.4; HRMS (ESI/TOF)  $m/z$ :  $[\text{M}+\text{Na}]^+$  Calcd for  $\text{C}_{21}\text{H}_{24}\text{O}_4\text{Na}$  363.1572; Found 363.1572.

#### Ethyl 2-fluoro-2-((6-methoxynaphthalen-2-yl)methyl)-3-oxobutanoate (**5ad**)

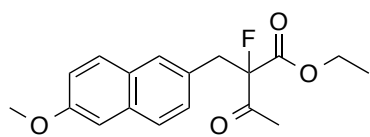

**5ad**

This compound was prepared according to the same method to **3aa** and the desired product was obtained after purification by preparative thin-layer chromatography (Hexane/EtOAc = 9/1  $\times$  3). White solid (41.9 mg, 0.132 mmol, 53% yield); M.p. 62.2–64.6 °C; IR (KBr) 2992, 2939, 1752, 1731, 1607, 1192, 1028, 856, 813  $\text{cm}^{-1}$ ;  $^1\text{H}$  NMR (270 MHz,  $\text{CDCl}_3$ ):  $\delta$  1.24 (t,  $J = 7.2$  Hz, 3H), 2.12 (d,  $J_{\text{CF}} = 5.4$  Hz, 3H), 3.43–3.65 (m, 2H), 3.92 (s, 3H), 4.17–4.28 (m, 2H), 7.10 (d,  $J = 2.5$  Hz, 1H), 7.14 (dd,  $J = 8.8, 2.5$  Hz, 1H), 7.29–7.33 (m, 1H), 7.61 (s, 1H), 7.67 (d,  $J = 8.4$  Hz, 1H), 7.68 (d,  $J = 8.9$  Hz, 1H);  $^{13}\text{C}$  NMR (67.9 MHz,  $\text{CDCl}_3$ ):  $\delta$  13.9, 26.3, 39.7 (d,  $J_{\text{CF}} = 20.7$  Hz), 55.2, 62.6, 100.2 (d,  $J_{\text{CF}} = 200$  Hz), 105.4, 119.0, 126.8, 128.1, 128.7 (d,  $J_{\text{CF}} = 3.4$  Hz), 128.7, 129.1, 129.2 (d,  $J_{\text{CF}} = 4.5$  Hz), 133.7, 157.7, 165.7 (d,  $J_{\text{CF}} = 25.7$  Hz), 202.6 (d,  $J_{\text{CF}} = 29.6$  Hz);  $^{19}\text{F}$  NMR (471 MHz,  $\text{CDCl}_3$ ):  $\delta$  -165.3 –

-165.4 (m); HRMS (ESI/TOF)  $m/z$ :  $[M+Na]^+$  Calcd for  $C_{18}H_{19}FO_4Na$  341.1165; Found 341.1155.

### 3-((6-Methoxynaphthalen-2-yl)methyl)-3-methylpentane-2,4-dione (**5ae**)

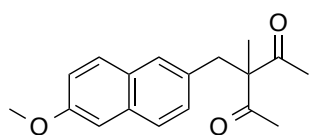

**5ae**

This compound was prepared according to the same method to **3aa** and the desired product was obtained after purification by preparative thin-layer chromatography (Hexane/EtOAc = 9/1  $\times$  2 and Pentane/EtOAc = 4/1  $\times$  2). Colorless oil (53.5 mg, 0.188 mmol, 75% yield); IR (neat) 3058, 2999, 2937, 2841, 1697, 1606, 1484, 1358, 1229, 1031, 855, 756  $cm^{-1}$ ;  $^1H$  NMR (270 MHz,  $CDCl_3$ ):  $\delta$  1.33 (s, 3H), 2.13 (s, 6H), 3.31 (s, 2H), 3.91 (s, 3H), 7.09 (d,  $J$  = 2.6 Hz, 1H), 7.13 (dd,  $J$  = 8.9, 2.6 Hz, 1H), 7.15 (dd,  $J$  = 8.2, 1.6 Hz, 1H), 7.47 (d,  $J$  = 1.6 Hz, 1H), 7.63 (d,  $J$  = 8.4 Hz, 1H), 7.66 (d,  $J$  = 8.9 Hz, 1H);  $^{13}C$  NMR (67.9 MHz,  $CDCl_3$ ):  $\delta$  18.3, 27.3, 40.2, 55.2, 67.4, 105.4, 118.9, 126.7, 128.6, 128.7 (2C), 129.1, 131.5, 133.3, 157.5, 207.2; HRMS (ESI/TOF)  $m/z$ :  $[M+Na]^+$  Calcd for  $C_{18}H_{20}O_3Na$  307.1310; Found 307.1306.

### 2-Acetyl-2-((6-methoxynaphthalen-2-yl)methyl)cyclohexanone (**5af**)

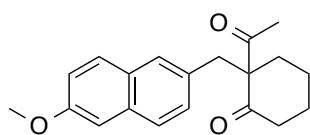

**5af**

This compound was prepared according to the same method to **3aa** and the desired product was obtained after purification by silica gel column chromatography (Hexane/EtOAc = 95/5, 9/1, 4/1) and preparative thin-layer chromatography (Toluene/EtOAc = 9/1  $\times$  2). Light brown solid (32.1 mg, 0.103 mmol, 41% yield); M.p. 85.3–86.3  $^{\circ}C$ ; IR (KBr) 2960, 2937, 2868, 1690, 1607, 1485, 1265, 1233, 1165, 1121, 1033, 849, 817  $cm^{-1}$ ;  $^1H$  NMR (270 MHz,  $CDCl_3$ ):  $\delta$  1.42–1.74 (m, 4H), 1.91–2.03 (m, 1H), 2.12 (s, 3H), 2.20–2.32 (m, 1H), 2.36–2.44 (m, 1H), 2.49–2.57 (m, 1H), 3.25 (s, 2H), 3.91 (s, 3H), 7.08 (d,  $J$  = 2.6 Hz, 1H), 7.12 (dd,  $J$  = 8.5, 2.6 Hz, 1H), 7.17 (dd,  $J$  = 8.4, 1.6 Hz, 1H), 7.47 (d,  $J$  = 1.6 Hz, 1H), 7.62 (d,  $J$  = 8.4 Hz, 1H), 7.66 (d,  $J$  = 8.9 Hz, 1H);  $^{13}C$  NMR (67.9 MHz,  $CDCl_3$ ):  $\delta$  22.2, 26.9 (2C), 33.9, 39.8, 42.0, 55.2, 68.8, 105.4, 118.8, 126.5, 128.7, 128.8, 129.0, 129.1, 131.3, 133.3, 157.5, 206.0, 209.5; HRMS (ESI/TOF)  $m/z$ :  $[M+Na]^+$  Calcd for  $C_{20}H_{22}O_3Na$  333.1467; Found 333.1456.

5-((6-Methoxynaphthalen-2-yl)methyl)-2,2,5-trimethyl-1,3-dioxane-4,6-dione (**5ag**)

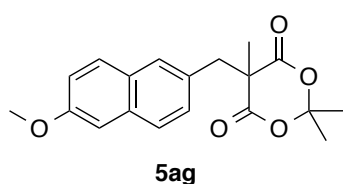

This compound was prepared according to the same method to **3aa** and the desired product was obtained after purification by preparative thin-layer chromatography (Hexane/EtOAc = 4/1). Pale yellow solid (69.9 mg, 0.213 mmol, 85% yield); M.p. 139.1–140.9 °C; IR (KBr) 2994, 2943, 1768, 1736, 1606, 1336, 1284, 1066, 816  $\text{cm}^{-1}$ ;  $^1\text{H}$  NMR (270 MHz,  $\text{CDCl}_3$ ):  $\delta$  0.79 (s, 3H), 1.57–1.58 (m, 3H), 1.79 (s, 3H), 3.46 (s, 2H), 3.90 (s, 3H), 7.07 (d,  $J$  = 2.7 Hz, 1H), 7.12 (dd,  $J$  = 8.9, 2.7 Hz, 1H), 7.25 (dd,  $J$  = 8.6, 1.5 Hz, 1H), 7.57 (d,  $J$  = 1.5 Hz, 1H), 7.64 (d,  $J$  = 9.2 Hz, 1H), 7.68 (d,  $J$  = 9.7 Hz, 1H);  $^{13}\text{C}$  NMR (67.9 MHz,  $\text{CDCl}_3$ ):  $\delta$  25.8, 28.3, 29.3, 44.9, 52.2, 55.2, 105.2, 105.3, 119.0, 127.1, 128.3, 128.7, 128.9, 129.4, 130.3, 133.8, 157.7, 169.9; HRMS (ESI/TOF)  $m/z$ :  $[\text{M}+\text{Na}]^+$  Calcd for  $\text{C}_{19}\text{H}_{20}\text{O}_5\text{Na}$  351.1208; Found 351.1209.

Ethyl 2-cyano-3-(6-methoxynaphthalen-2-yl)-2-((6-methoxynaphthalen-2-yl)methyl)propanoate (**5ah**)

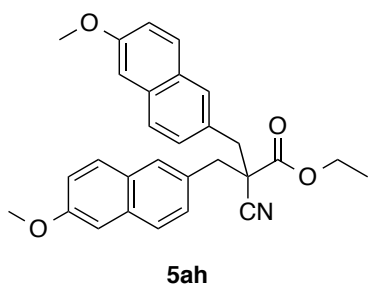

This compound was prepared according to the same method to **3aa** and the desired product was obtained after purification by preparative thin-layer chromatography (Hexane/EtOAc = 85/15  $\times$  2 and Toluene/EtOAc = 9/1  $\times$  2). Brown solid (35.0 mg, 0.0772 mmol, 62% yield); M.p. 106.5–107.7 °C; IR (KBr) 2965, 2939, 2246, 1733, 1606, 1484, 1392, 1237, 1198, 1027, 857  $\text{cm}^{-1}$ ;  $^1\text{H}$  NMR (270 MHz,  $\text{CDCl}_3$ ):  $\delta$  0.88 (t,  $J$  = 7.1 Hz, 3H), 3.27 (d,  $J$  = 13.5 Hz, 2H), 3.50 (d,  $J$  = 13.5 Hz, 2H), 3.92 (s, 6H), 3.97 (q,  $J$  = 7.1 Hz, 2H), 7.11–7.16 (m, 4H), 7.41 (dd,  $J$  = 8.6, 1.6 Hz, 2H), 7.69–7.72 (m, 6H);  $^{13}\text{C}$  NMR (67.9 MHz,  $\text{CDCl}_3$ ):  $\delta$  13.6, 43.3, 53.4, 55.3, 62.6, 105.5, 118.8, 119.1, 127.0, 128.3, 128.7, 128.9, 129.2, 129.3, 134.0, 157.8, 168.4; HRMS (ESI/TOF)  $m/z$ :  $[\text{M}+\text{Na}]^+$  Calcd for  $\text{C}_{29}\text{H}_{27}\text{NO}_4\text{Na}$  476.1838; Found 476.1833.

#### 4. Experimental details for the mechanistic experiments

##### Scheme S5. Reaction of benzofuran-2-ylmethyl 2,3,4,5,6-pentafluorobenzoate (**1i**)

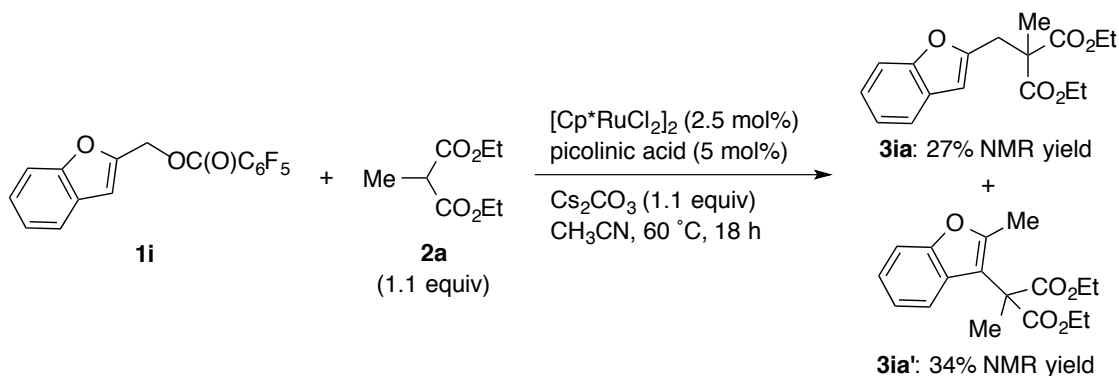

Benzofuran-2-ylmethyl 2,3,4,5,6-pentafluorobenzoate (**1i**) (85.6 mg, 0.25 mmol),  $[\text{Cp}^*\text{RuCl}_2]_2$  (3.8 mg, 0.00625 mmol, 0.025 equiv), picolinic acid (**L1**) (1.5 mg, 0.0125 mmol, 0.05 equiv),  $\text{Cs}_2\text{CO}_3$  (89.6 mg, 0.275 mmol, 1.1 equiv) were charged into a screw cap vial. The resulting mixture was carefully evacuated and refilled with  $\text{N}_2$  five times. After the addition of  $\text{CH}_3\text{CN}$  (1 mL) and diethyl methylmalonate (**2a**) (47  $\mu\text{L}$ , 0.275 mmol, 1.1 equiv), the resulting yellow suspension was stirred at 60 °C for 18 h. The reaction was allowed to cool to room temperature and quenched with water (1 mL). The resulting aqueous phase was extracted with EtOAc (3 mL  $\times$  1). The organic phase was washed with brine and dried over  $\text{MgSO}_4$ . After removal of the solvent, the yields of benzylic alkylation product **3ia** and aromatic substitution **3ia'** were determined to be 27% and 34%, respectively, by  $^1\text{H}$  NMR analyses of the crude reaction mixture. The resulting crude mixture was purified by silica gel column chromatography (Hexane/EtOAc = 95/5) and preparative thin-layer chromatography (Pentane/EtOAc = 95/5) to give **3ia** in 18% yield (13.4 mg, 0.0440 mmol, 18% yield) and **3ia'** in 19% yield (14.8 mg, 0.0486 mmol, 19% yield), respectively.

##### Diethyl 2-(benzofuran-2-ylmethyl)-2-methylmalonate (**3ia**)<sup>1</sup>

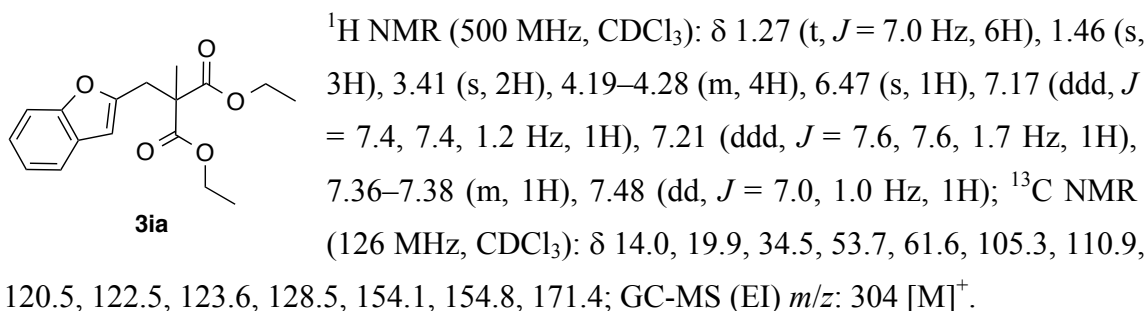

Diethyl 2-methyl-2-(2-methylbenzofuran-3-yl)malonate (**3ia'**)

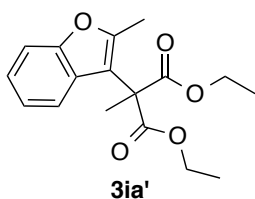

IR (neat) 2983, 2939, 1733, 1603, 1586, 1455, 1242, 1110, 1021, 752  $\text{cm}^{-1}$ ;  $^1\text{H}$  NMR (500 MHz,  $\text{CDCl}_3$ ):  $\delta$  1.25 (t,  $J = 7.0$  Hz, 6H), 1.95 (s, 3H), 2.38 (s, 3H), 4.19–4.32 (m, 4H), 7.14 (ddd,  $J = 7.8, 7.8, 1.5$  Hz, 1H), 7.19 (ddd,  $J = 7.6, 7.6, 1.2$  Hz, 1H), 7.35 (d,  $J = 7.5$  Hz, 1H), 7.38 (d,  $J = 8.0$  Hz, 1H);  $^{13}\text{C}$  NMR (126 MHz,  $\text{CDCl}_3$ ):  $\delta$  13.9, 22.3, 53.7, 61.9, 110.7, 112.9, 120.5, 122.1, 123.2, 128.1, 151.4, 153.3, 170.9, one peak was not found probably due to overlapping; HRMS (ESI/TOF)  $m/z$ :

$[\text{M}+\text{Na}]^+$  Calcd for  $\text{C}_{17}\text{H}_{20}\text{O}_5\text{Na}$  327.1208; Found 327.1211.

**Scheme S6.** Reaction of (*R*)-1-(naphthalen-2-yl)ethyl 2,3,4,5,6-pentafluorobenzoate ((*R*)-**1f**)

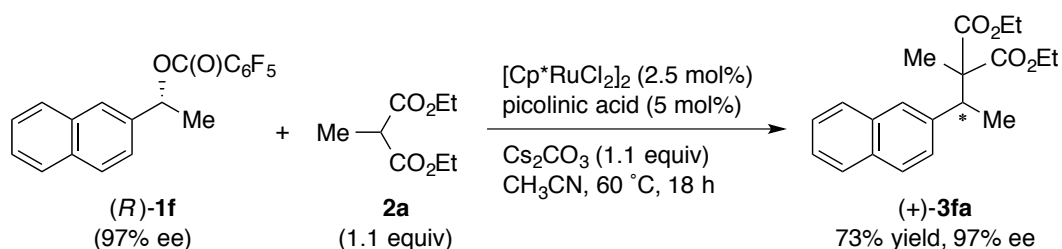

Preparation of (*R*)-1-(naphthalen-2-yl)ethyl 2,3,4,5,6-pentafluorobenzoate ((*R*)-**1f**):

(*R*)-**1f** was prepared according to the our previously reported method using (*R*)-1-(2-naphthyl)methanol as a chiral alcohol.<sup>1</sup> Pale yellow solid (941 mg, 2.57 mmol, 88% yield, 97% ee).  $[\alpha]_{\text{D}}^{28} = -13.3$  ( $c$  1.02,  $\text{CHCl}_3$ ); HPLC conditions: DAICEL CHIRALPAK AD-H, Hexane/*i*-PrOH = 99/1, flow rate = 1.0 mL/min,  $\lambda = 224$  nm, retention time;  $t_{\text{R}}$  (major) = 6.34 min,  $t_{\text{R}}$  (minor) = 7.82 min.

Reaction of (*R*)-**1f** with diethyl methylmalonate (**2a**):

(*R*)-1-(Naphthalen-2-yl)ethyl 2,3,4,5,6-pentafluorobenzoate ((*R*)-**1f**) (91.6 mg, 0.25 mmol),  $[\text{Cp}^*\text{RuCl}_2]_2$  (3.8 mg, 0.00625 mmol, 0.025 equiv), picolinic acid (**L1**) (1.5 mg, 0.0125 mmol, 0.05 equiv),  $\text{Cs}_2\text{CO}_3$  (89.6 mg, 0.275 mmol, 1.1 equiv) were charged into a screw cap vial. The resulting mixture was carefully evacuated and refilled with  $\text{N}_2$  five times. After the addition of  $\text{CH}_3\text{CN}$  (1 mL) and diethyl methylmalonate (**2a**) (47  $\mu\text{L}$ , 0.275 mmol, 1.1 equiv), the resulting yellow suspension was stirred at 60  $^\circ\text{C}$  for 18 h. The reaction was allowed to cool to room temperature and quenched with water (1



mL). The resulting aqueous phase was extracted with EtOAc (3 mL  $\times$  1). The organic phase was washed with brine and dried over MgSO<sub>4</sub>. After removal of the solvent, the resulting crude mixture was purified by silica gel column chromatography (Hexane/EtOAc = 97/3, 95/5, 92/8) and preparative thin-layer chromatography (Toluene/EtOAc = 9/1) to give (+)-**3fa** as a colorless oil (60.1 mg, 0.183 mmol, 73% yield, 97% ee).

(+)-Diethyl 2-methyl-2-(1-(naphthalen-2-yl)ethyl)malonate ((+)-**3fa**)

$[\alpha]_D^{28} = +60.1$  (*c* 0.91, CHCl<sub>3</sub>); HPLC conditions: DAICEL CHIRALPAK AD-H, Hexane/*i*-PrOH = 49/1, flow rate = 1.0 mL/min,  $\lambda = 224$  nm, retention time;  $t_R$  (minor) = 7.94 min,  $t_R$  (major) = 9.19 min.

## 5. Experimental details for the reaction of non-fused aromatic substrates

**Scheme S7.** Reaction of benzyl 2,3,4,5,6-pentafluorobenzoates (**1j**):

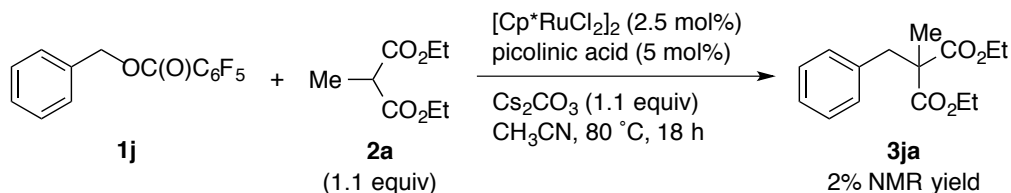

Benzyl 2,3,4,5,6-pentafluorobenzoate (**1j**) (75.6 mg, 0.25 mmol),  $[\text{Cp}^*\text{RuCl}_2]_2$  (3.8 mg, 0.00625 mmol, 0.025 equiv), picolinic acid (**L1**) (1.5 mg, 0.0125 mmol, 0.05 equiv),  $\text{Cs}_2\text{CO}_3$  (89.6 mg, 0.275 mmol, 1.1 equiv) were charged into a screw cap vial. The resulting mixture was carefully evacuated and refilled with  $\text{N}_2$  five times. After the addition of  $\text{CH}_3\text{CN}$  (1 mL) and diethyl methylmalonate (**2a**) (47  $\mu\text{L}$ , 0.275 mmol, 1.1 equiv), the resulting yellow suspension was stirred at 80 °C for 18 h. The reaction was allowed to cool to room temperature and quenched with water (1 mL). The resulting aqueous phase was extracted with EtOAc (3 mL  $\times$  1). The organic phase was washed with brine and dried over  $\text{MgSO}_4$ . After removal of the solvent, the yield of benzylic alkylation product **3ja** was determined to be 2% by  $^1\text{H}$  NMR analyses of the crude reaction mixture.

**Chart S1.**  $^1\text{H}$  NMR spectrum of the reaction of **1j**

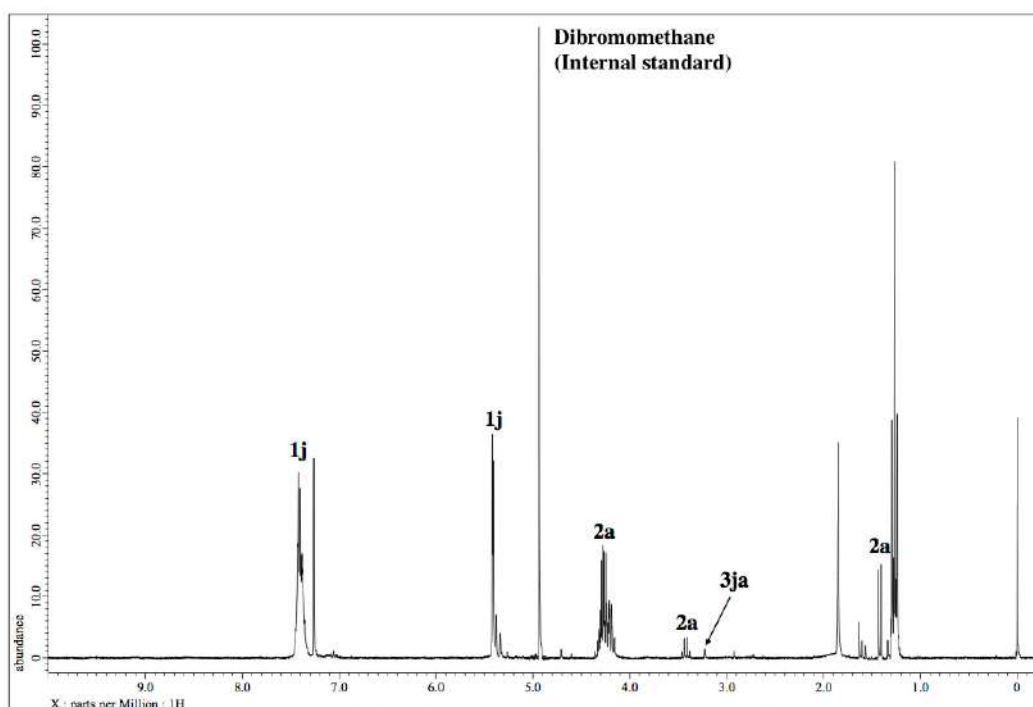

**Scheme S8.** Reaction of 4-(trifluoromethyl)benzyl 2,3,4,5,6-pentafluorobenzoates (**1k**)

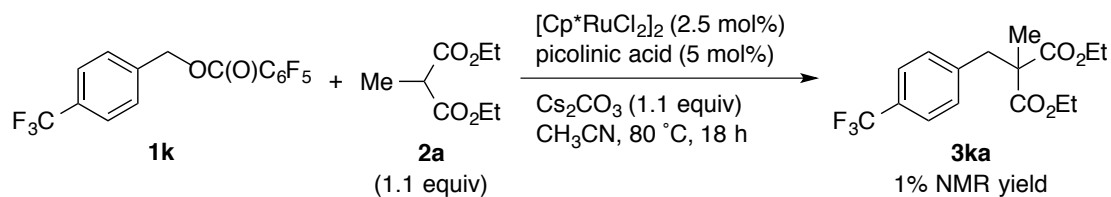

4-(Trifluoromethyl)benzyl 2,3,4,5,6-pentafluorobenzoate (**1k**) (92.6 mg, 0.25 mmol),  $[\text{Cp}^*\text{RuCl}_2]_2$  (3.8 mg, 0.00625 mmol, 0.025 equiv), picolinic acid (**L1**) (1.5 mg, 0.0125 mmol, 0.05 equiv),  $\text{Cs}_2\text{CO}_3$  (89.6 mg, 0.275 mmol, 1.1 equiv) were charged into a screw cap vial. The resulting mixture was carefully evacuated and refilled with  $\text{N}_2$  five times. After the addition of  $\text{CH}_3\text{CN}$  (1 mL) and diethyl methylmalonate (**2a**) (47  $\mu\text{L}$ , 0.275 mmol, 1.1 equiv), the resulting yellow suspension was stirred at  $80^\circ\text{C}$  for 18 h. The reaction was allowed to cool to room temperature and quenched with water (1 mL). The resulting aqueous phase was extracted with EtOAc (3 mL  $\times$  1). The organic phase was washed with brine and dried over  $\text{MgSO}_4$ . After removal of the solvent, the yield of benzylic alkylation product **3ka** was determined to be 1% by  $^1\text{H}$  NMR analyses of the crude reaction mixture.

**Chart S2.**  $^1\text{H}$  NMR spectrum of the reaction of **1k**

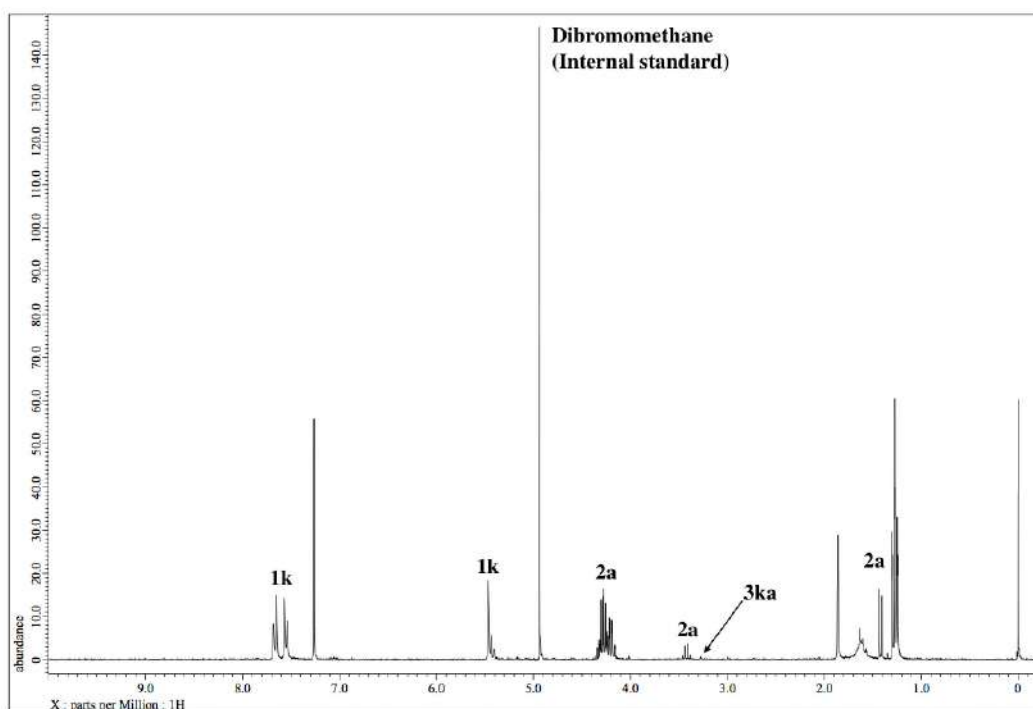

## 6. References

1. Tsuji, H.; Hashimoto, K.; Kawatsura, M. *Org. Lett.* **2019**, *21*, 8837–8841.
2. Mercier, A.; Yeo, W. C.; Chou, J.; Chaudhuri, P. D.; Bernardinelli, G.; Kündig, E. P. *Chem. Commun.* **2009**, 5227–5229.
3. Beckendorf, S.; Mancheño, O. G. *Synthesis* **2012**, *44*, 2162–2172.
4. Kuwano, R.; Kondo, Y.; Matsuyama, Y. *J. Am. Chem. Soc.* **2003**, *125*, 12104–12105.

## 7. Copies of NMR spectra ( $^1\text{H}$ , $^{13}\text{C}$ , and $^{19}\text{F}$ ) and HPLC chromatograms

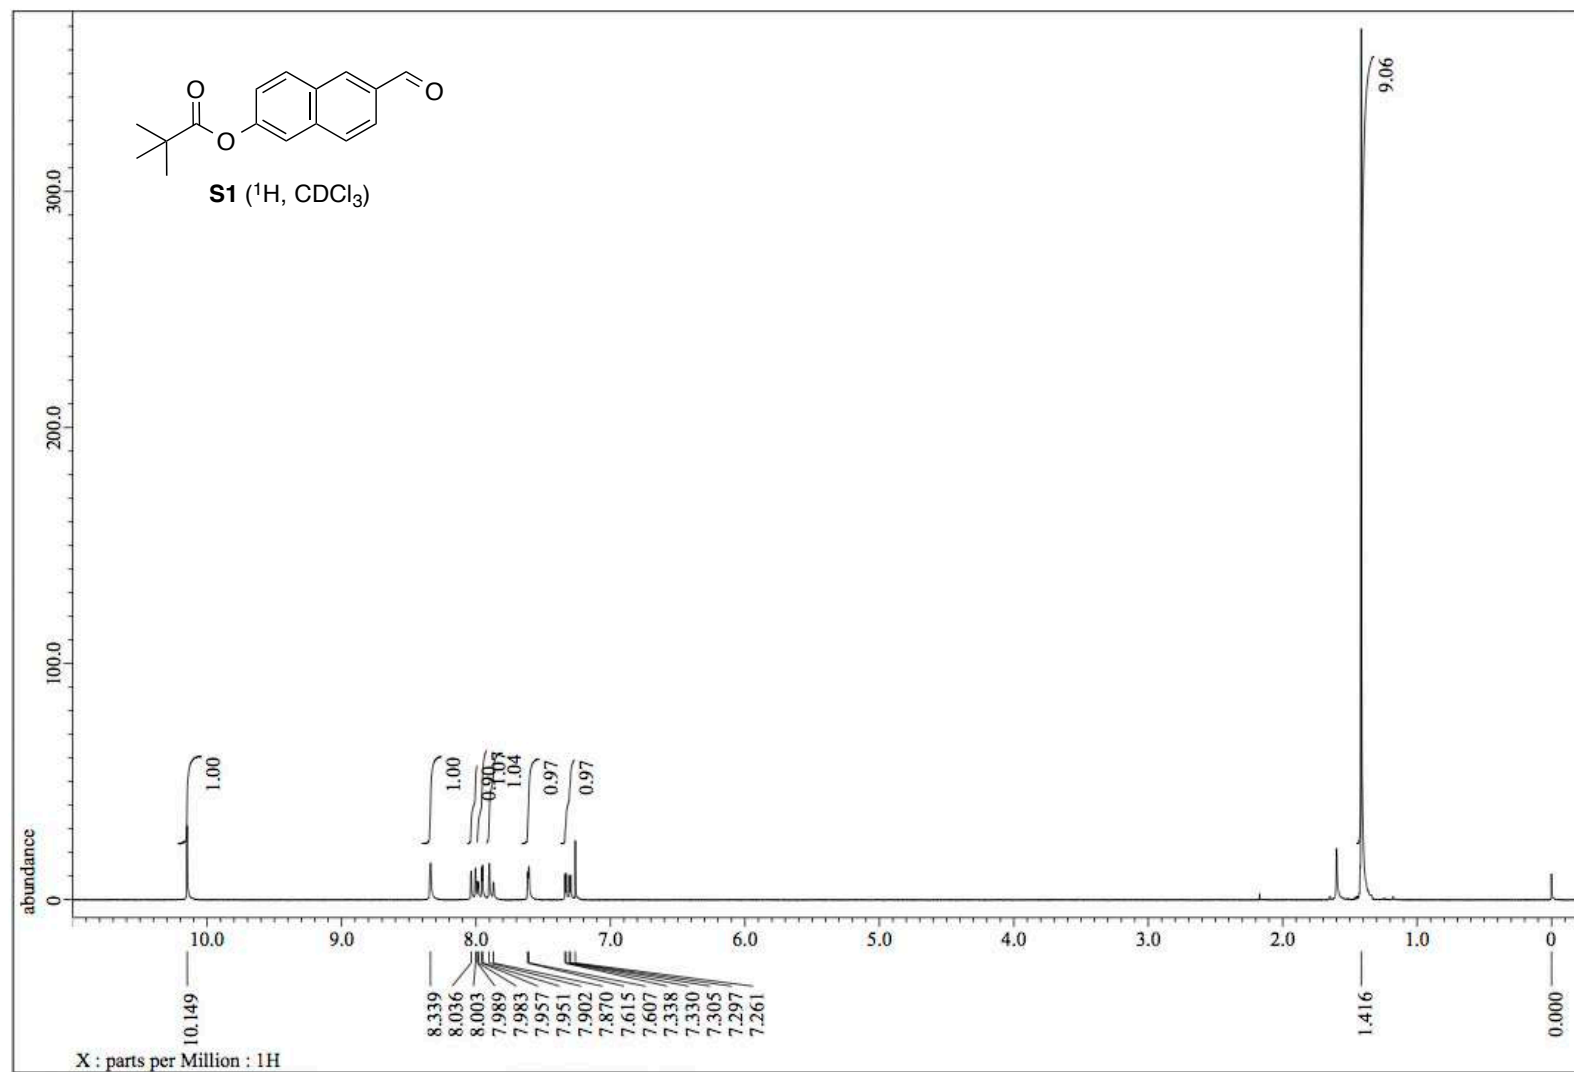

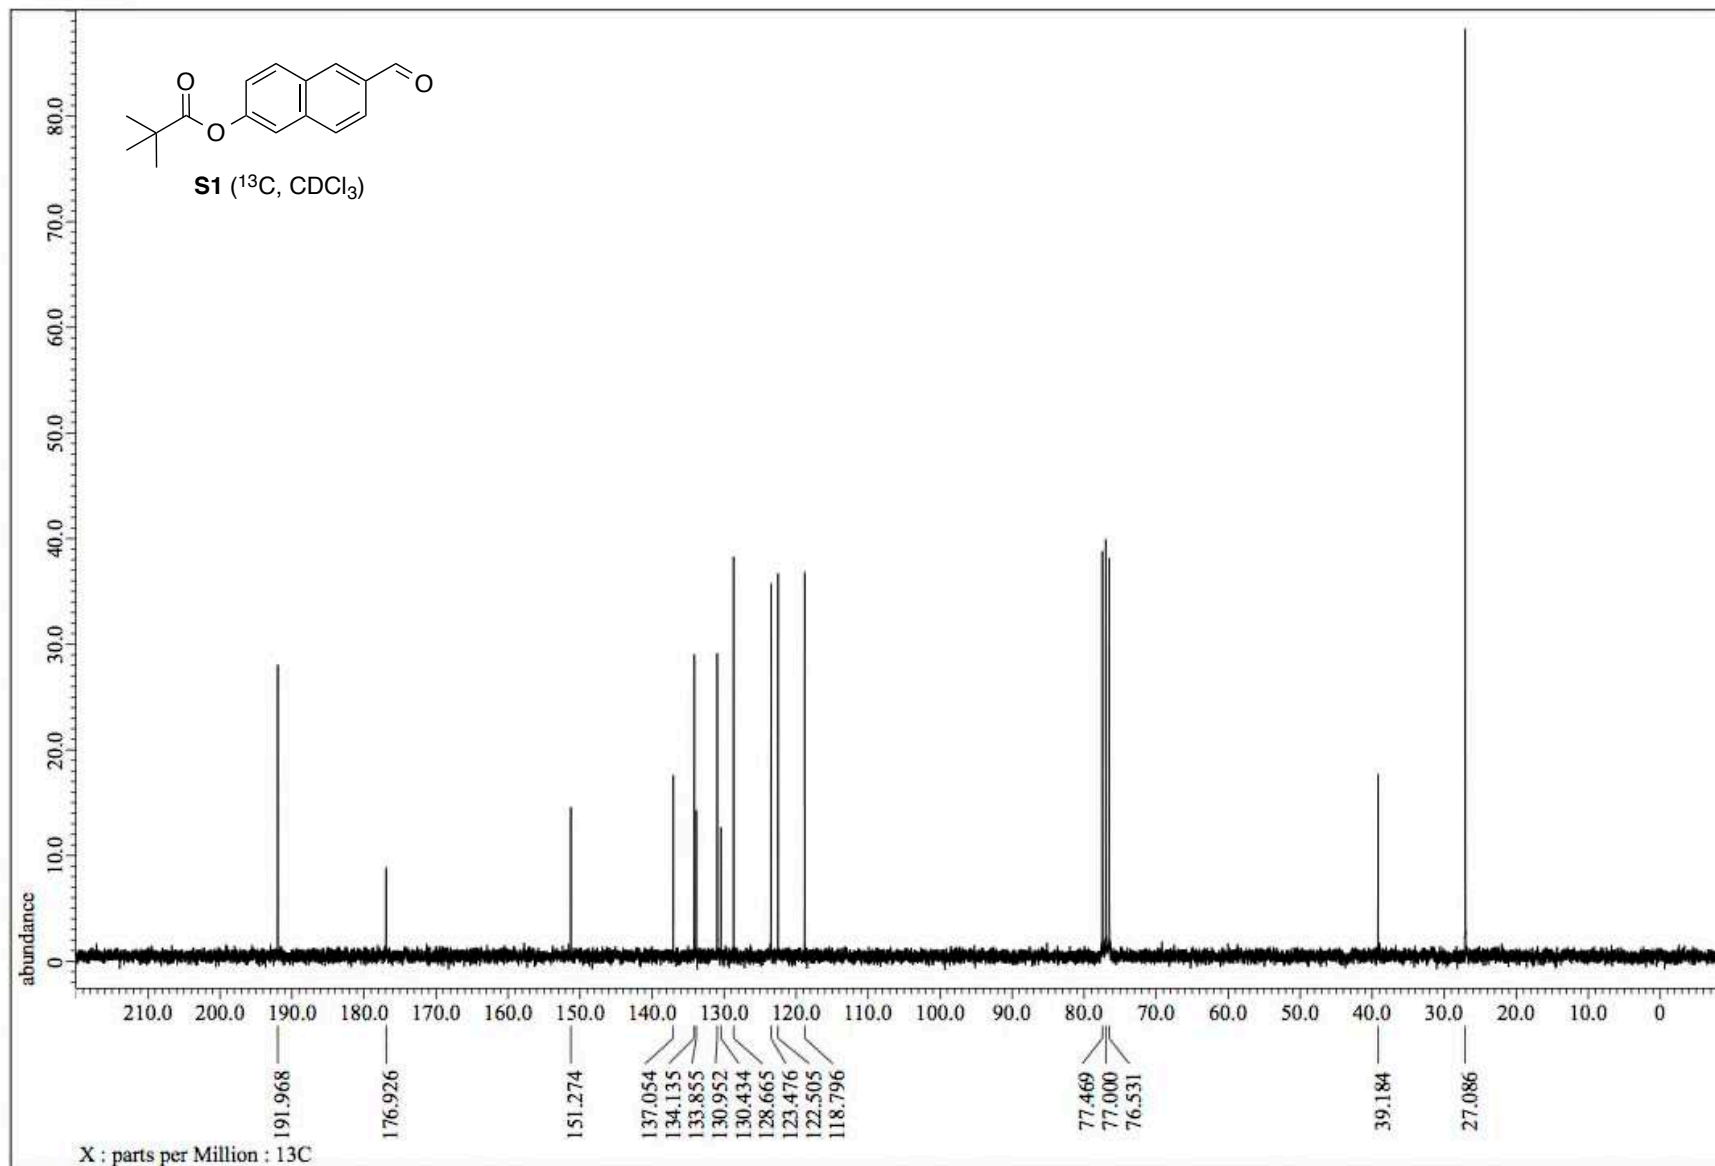

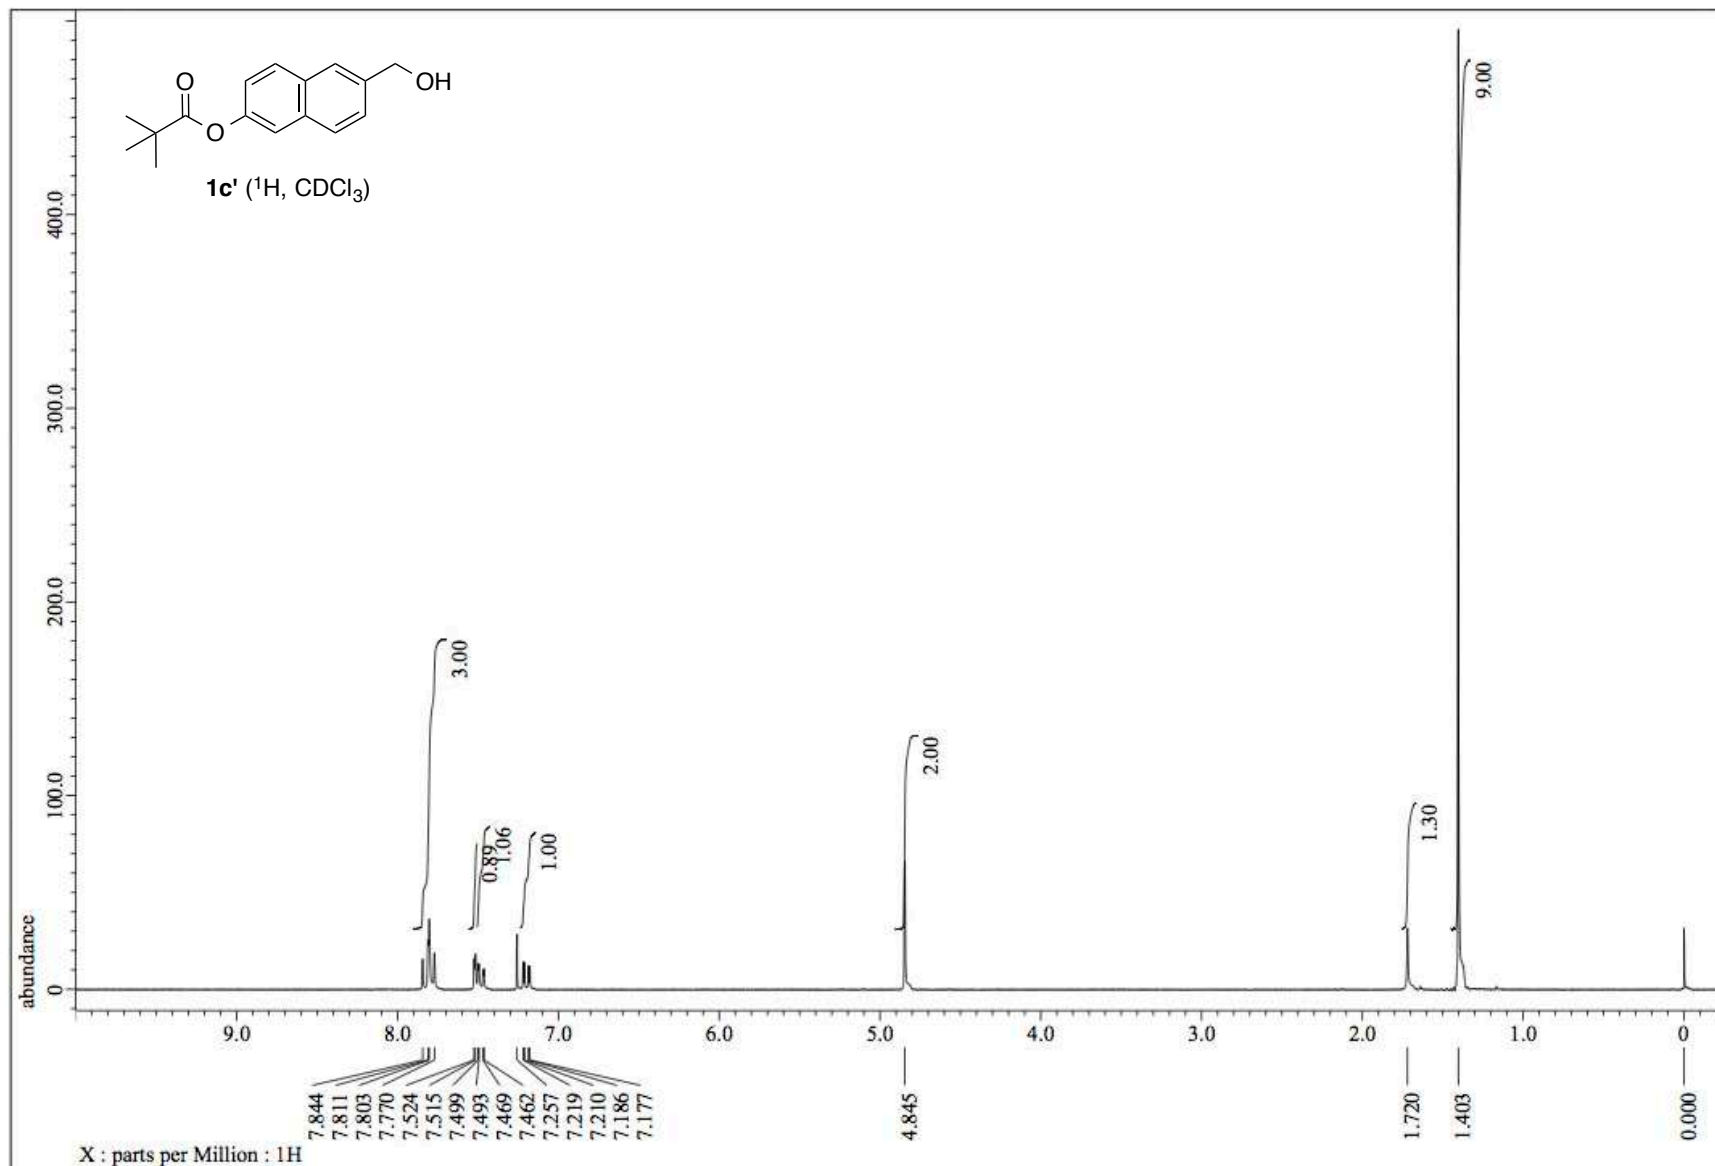

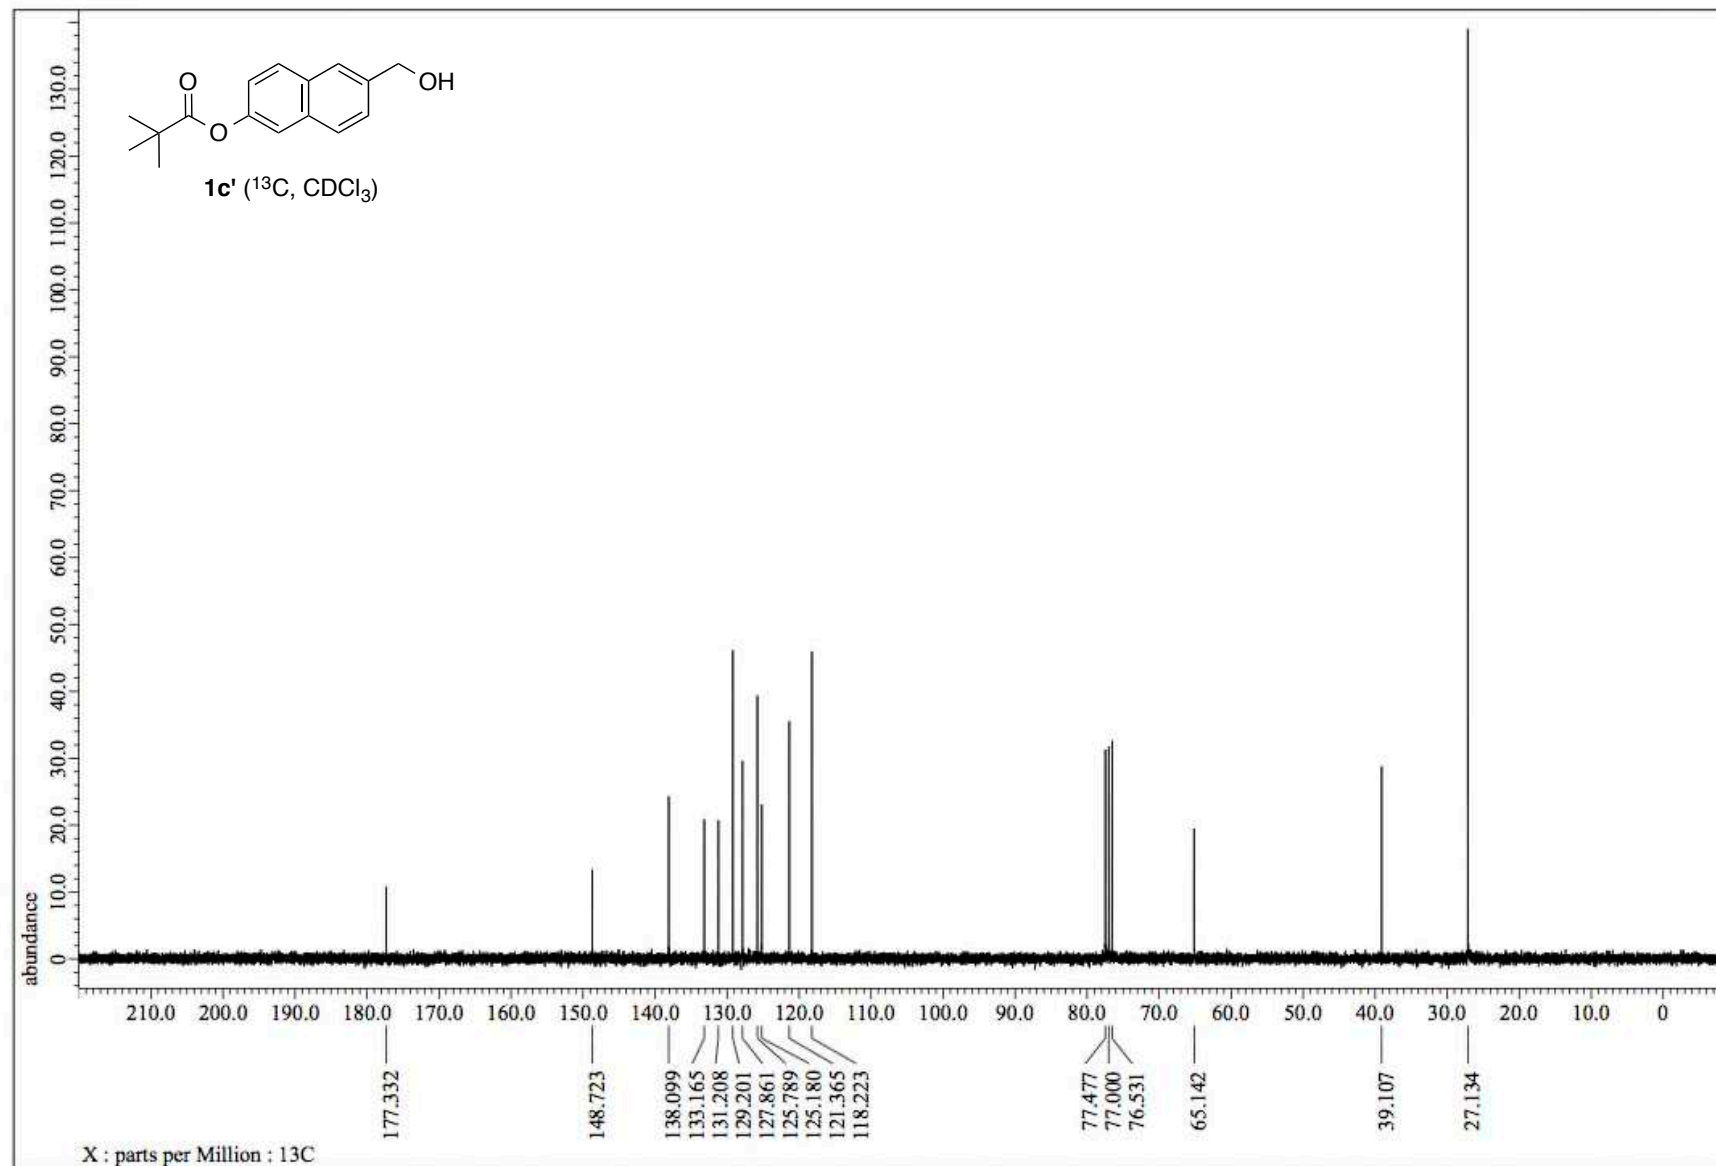



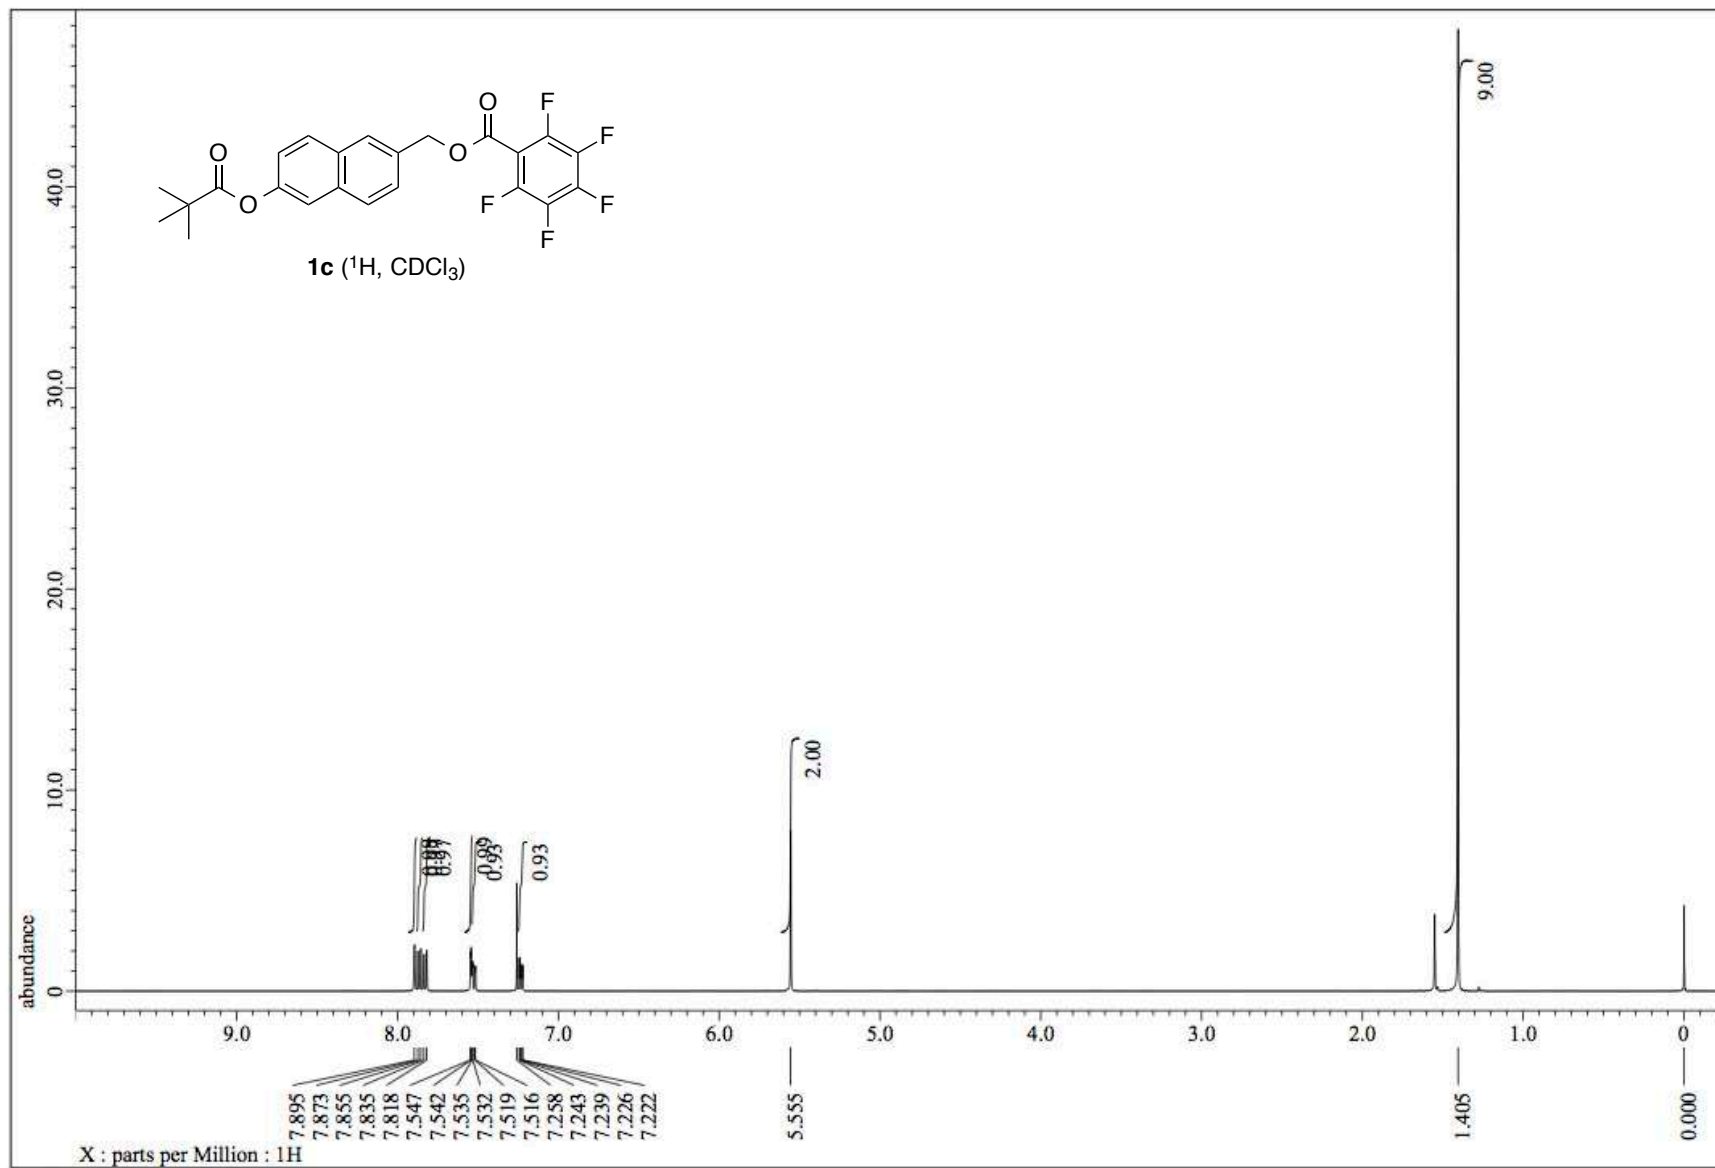

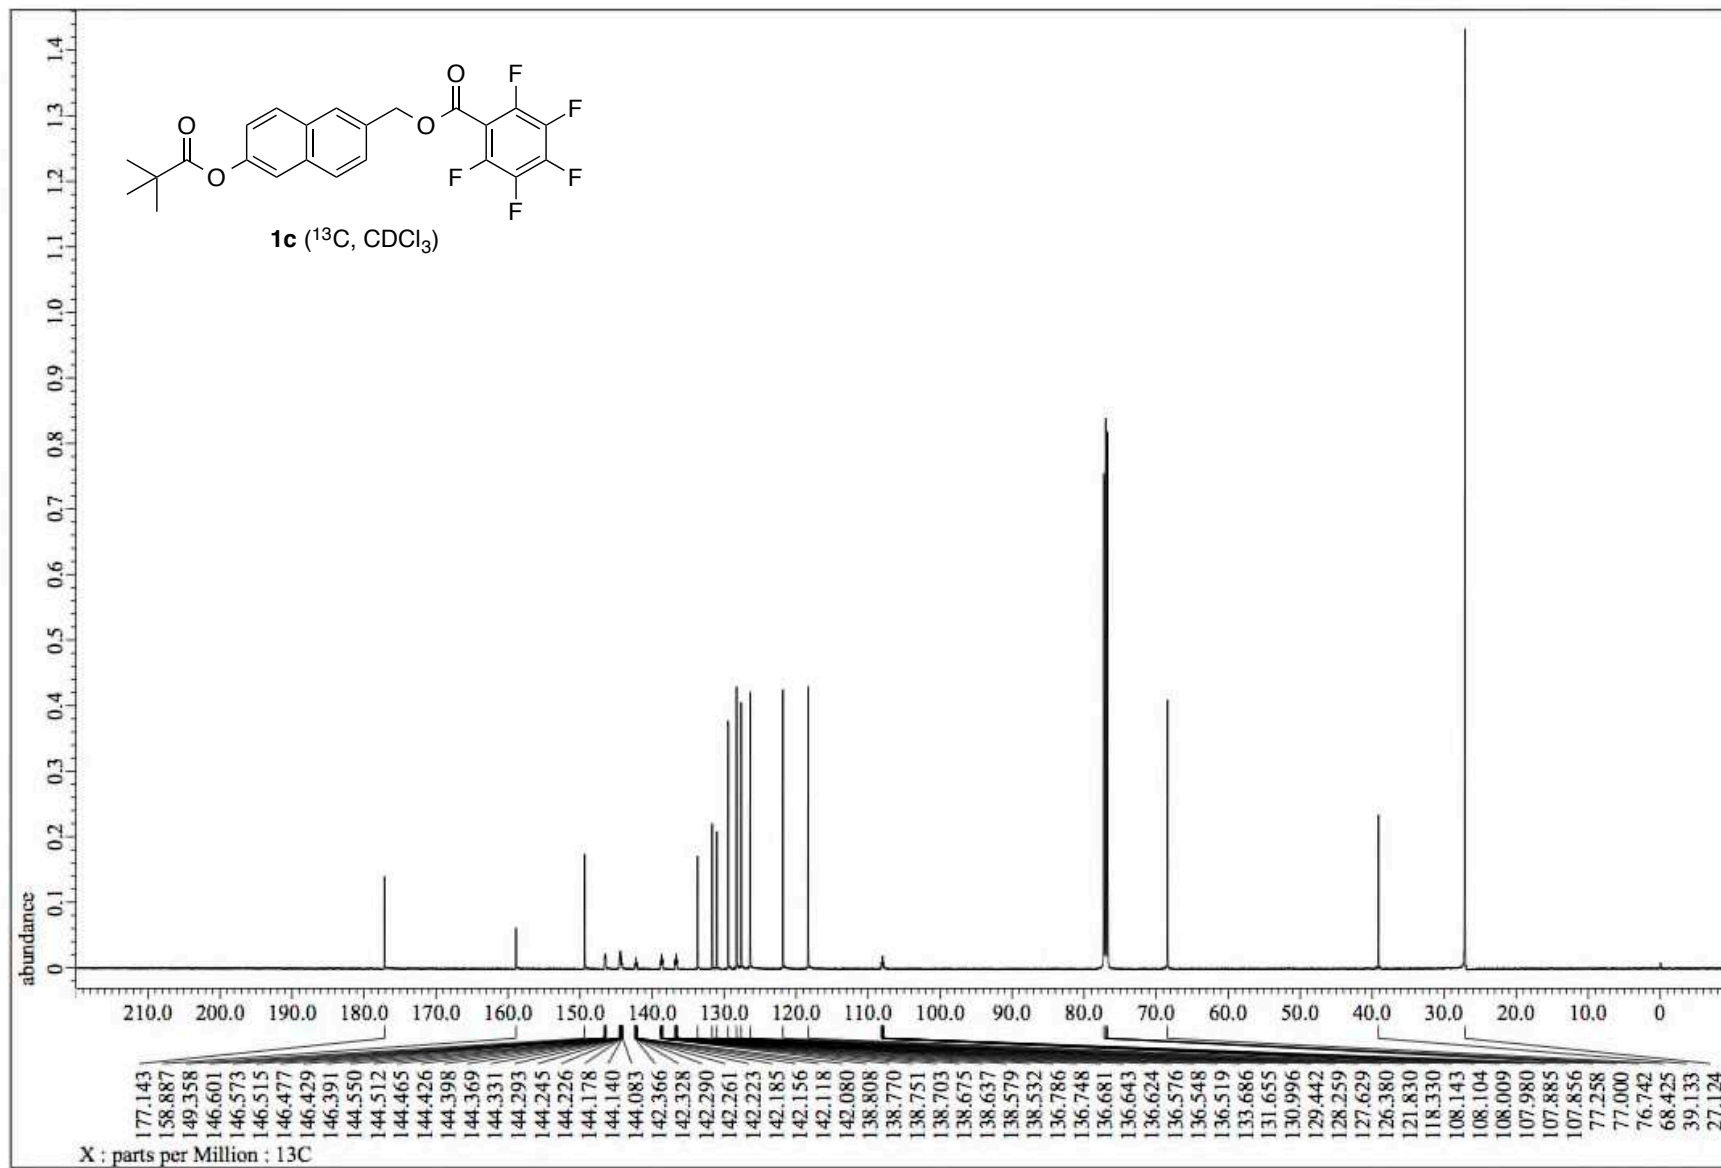

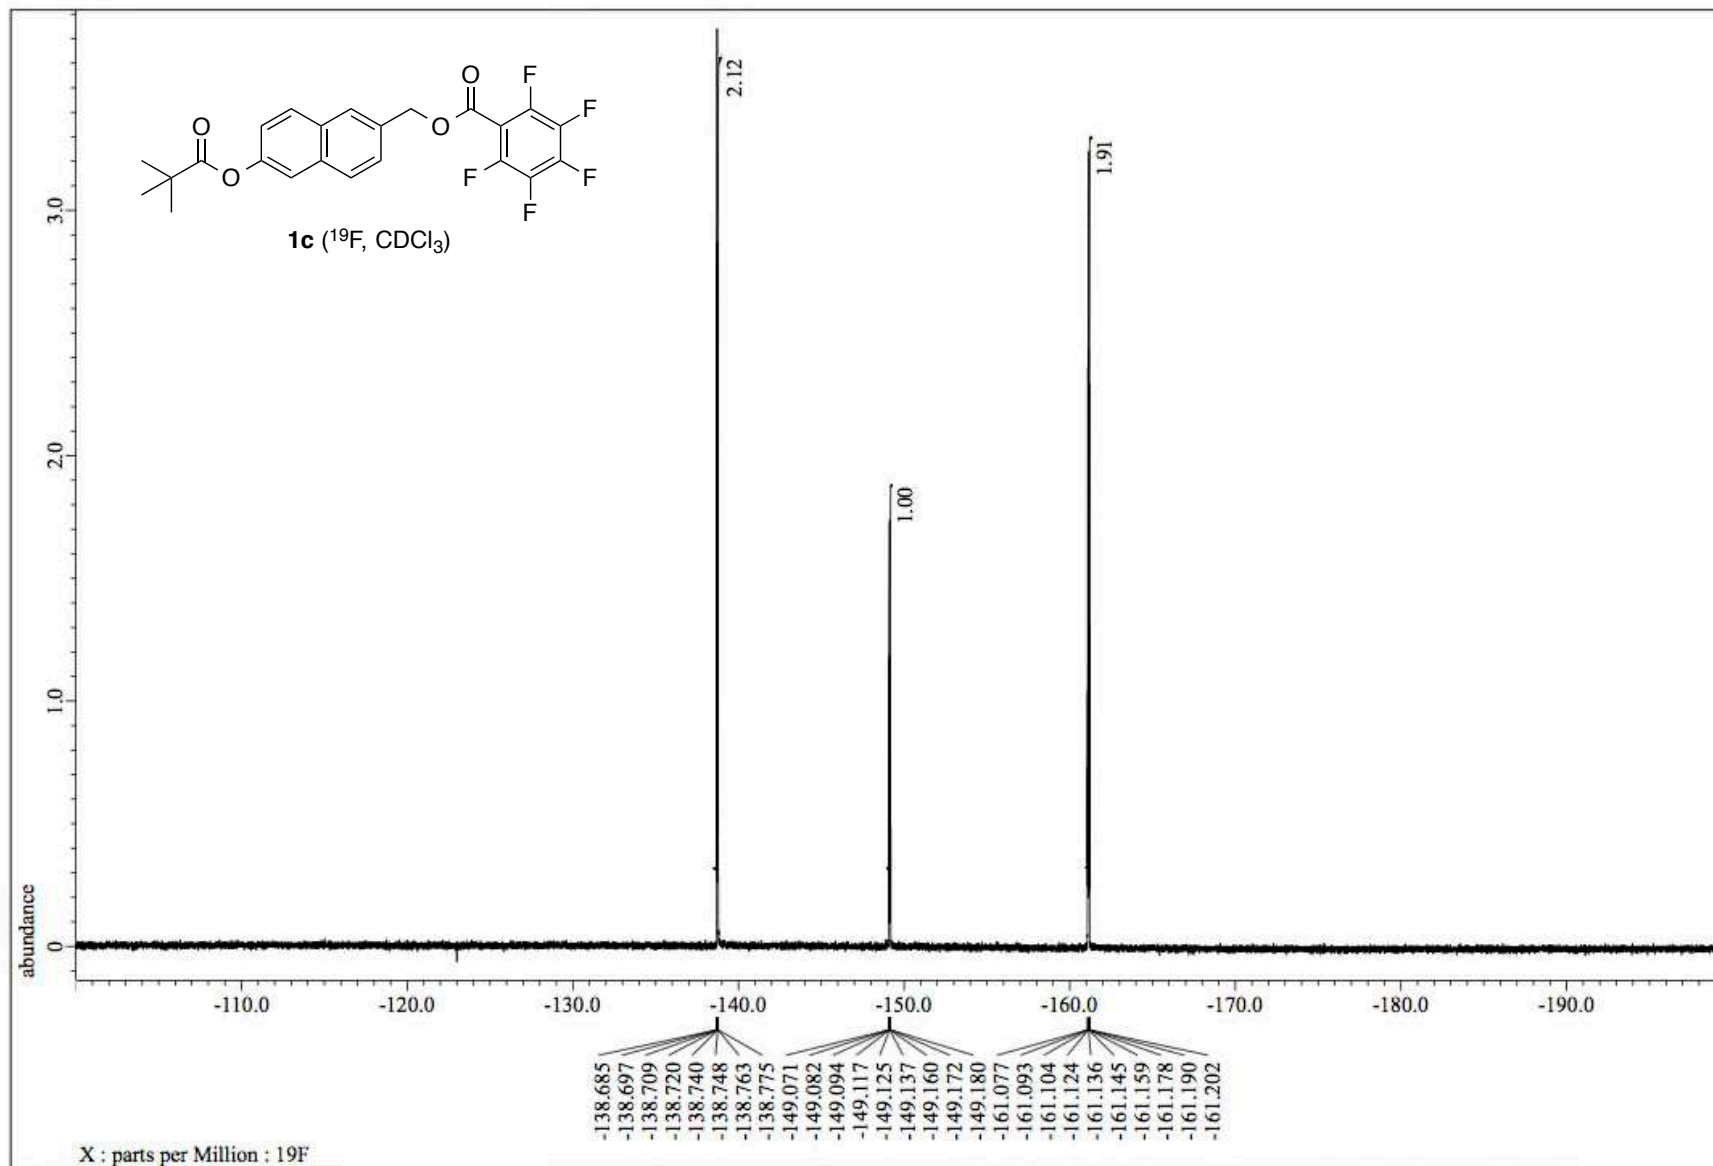

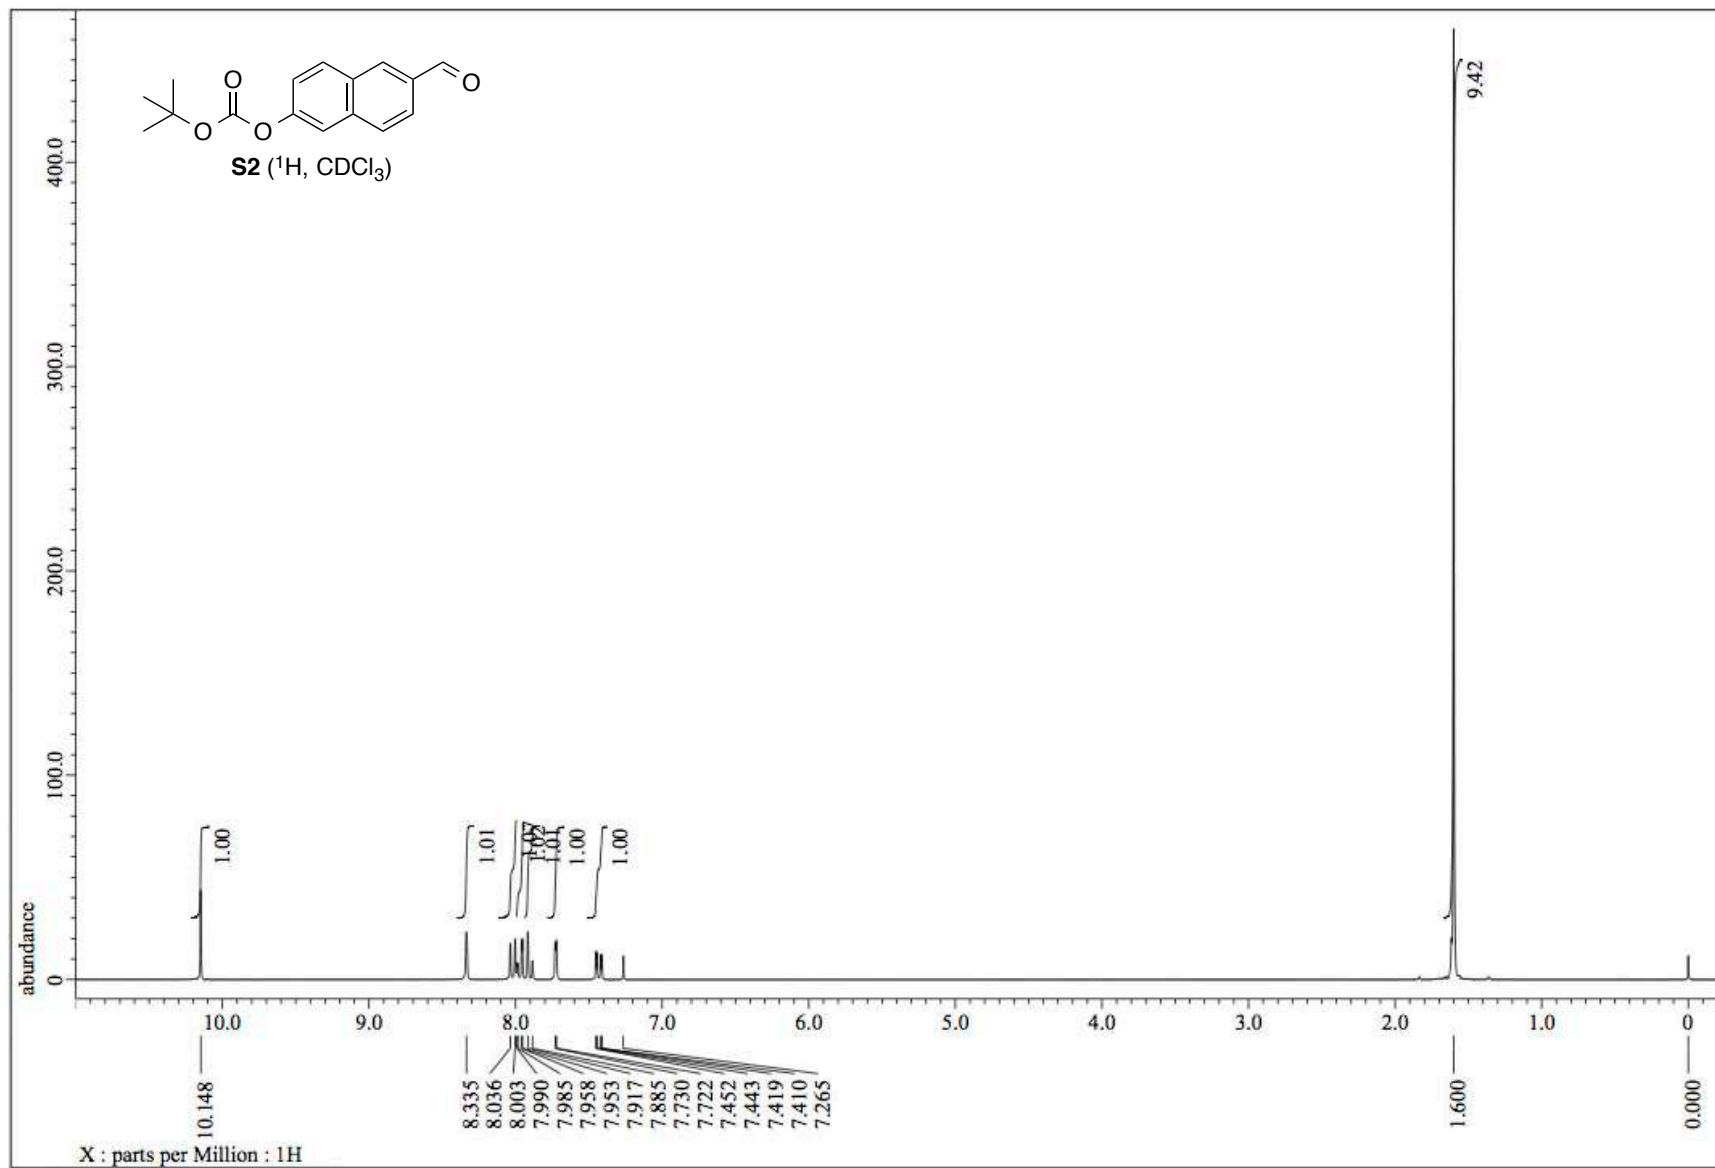

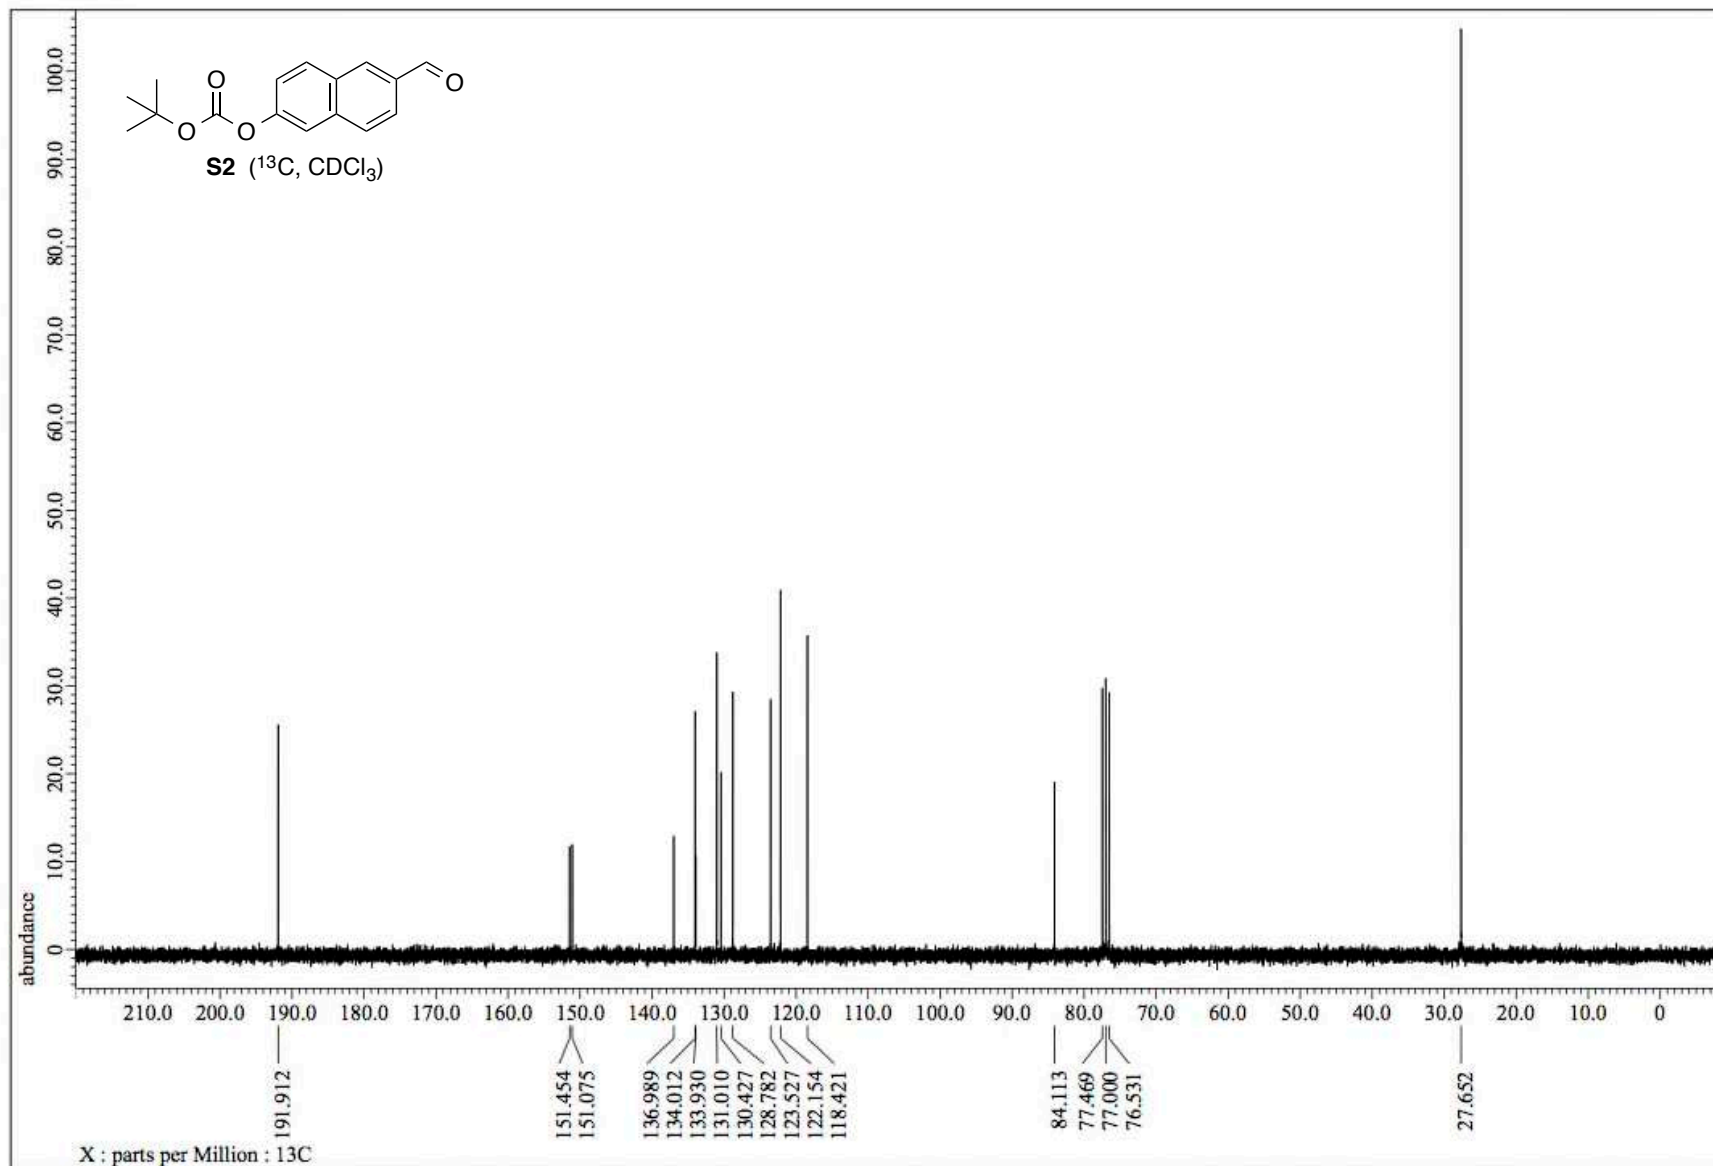

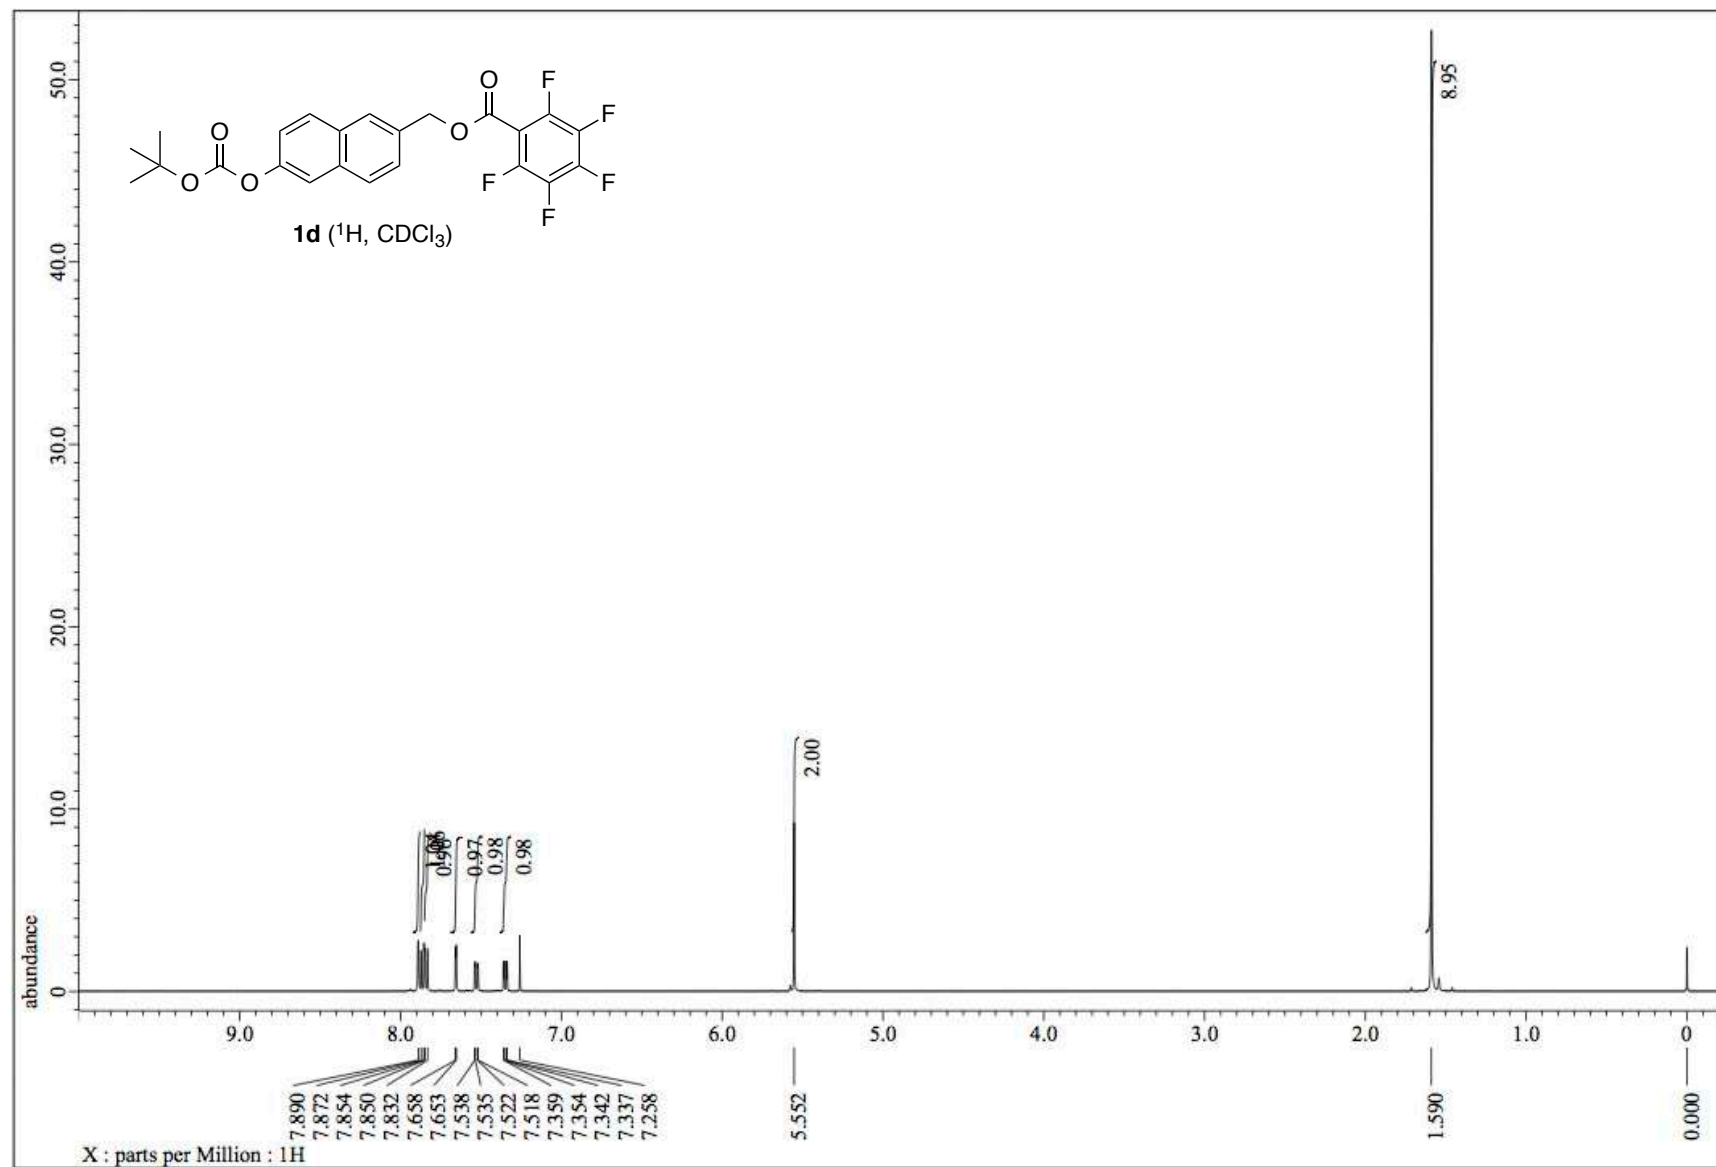

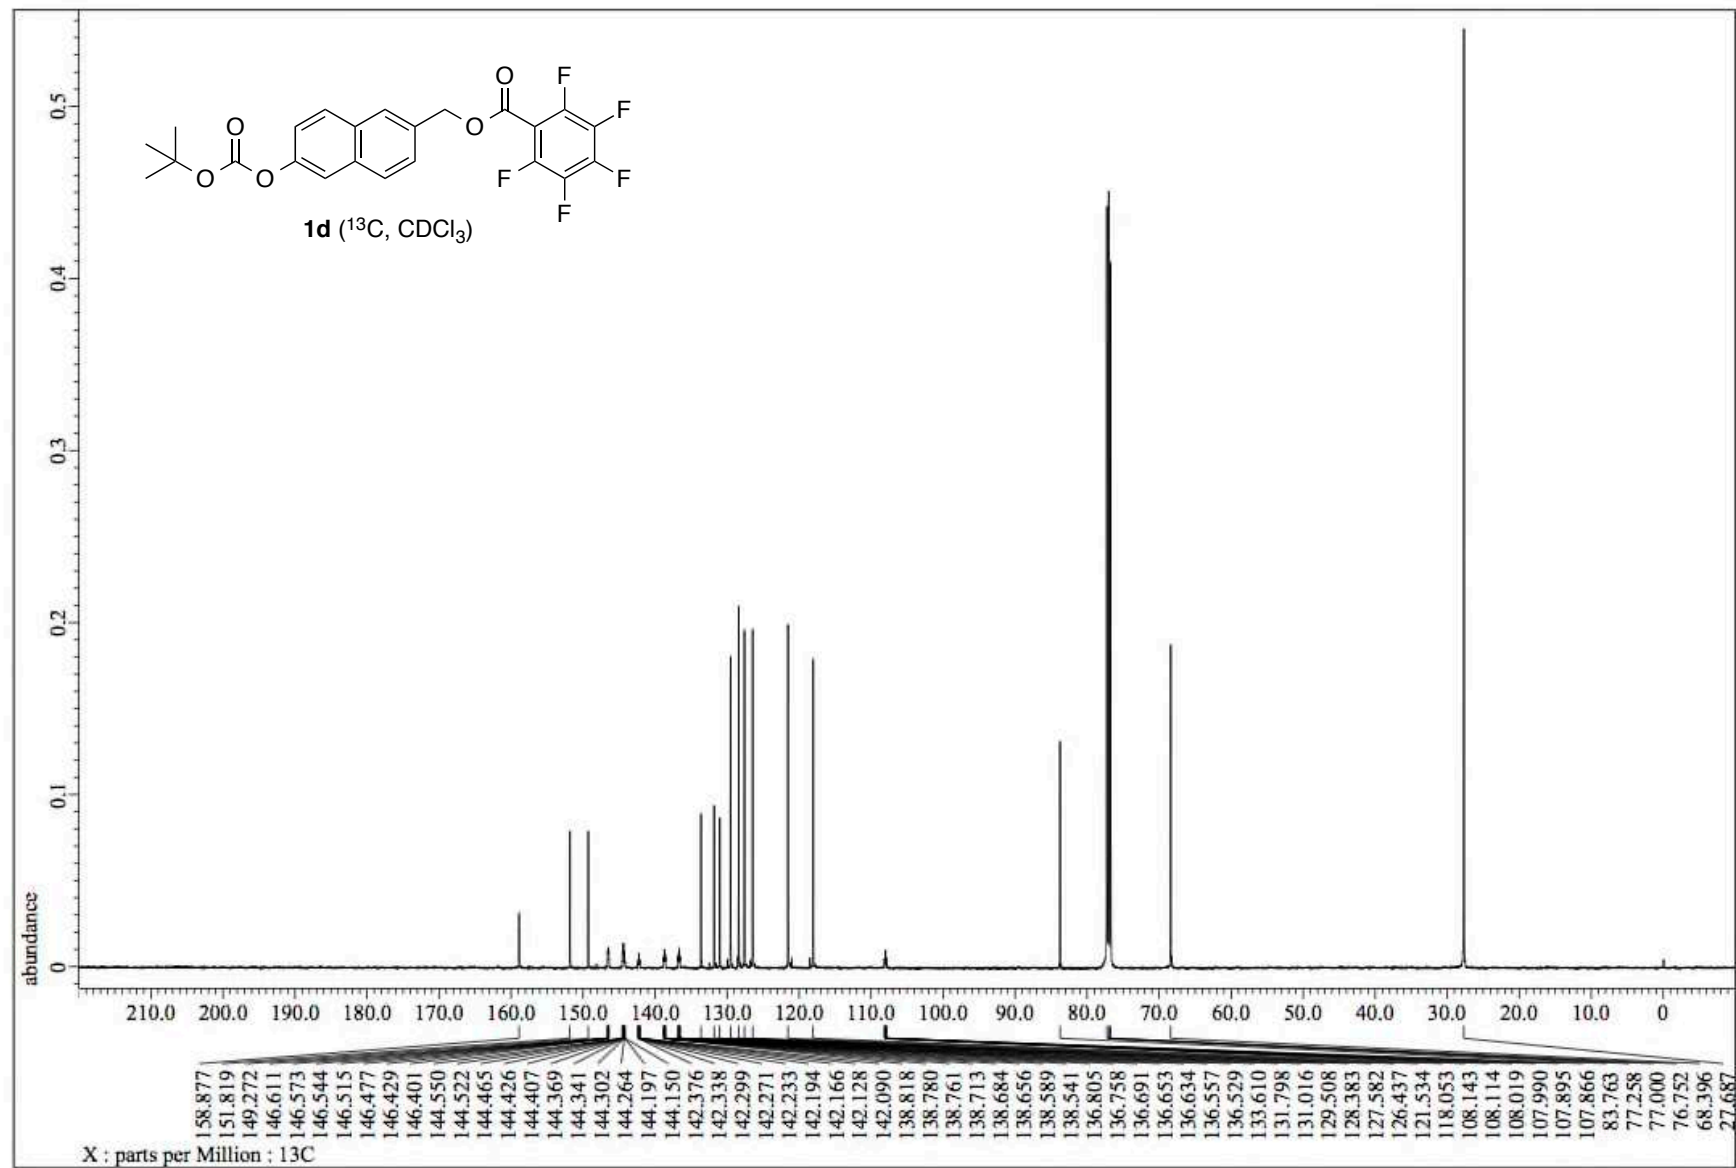

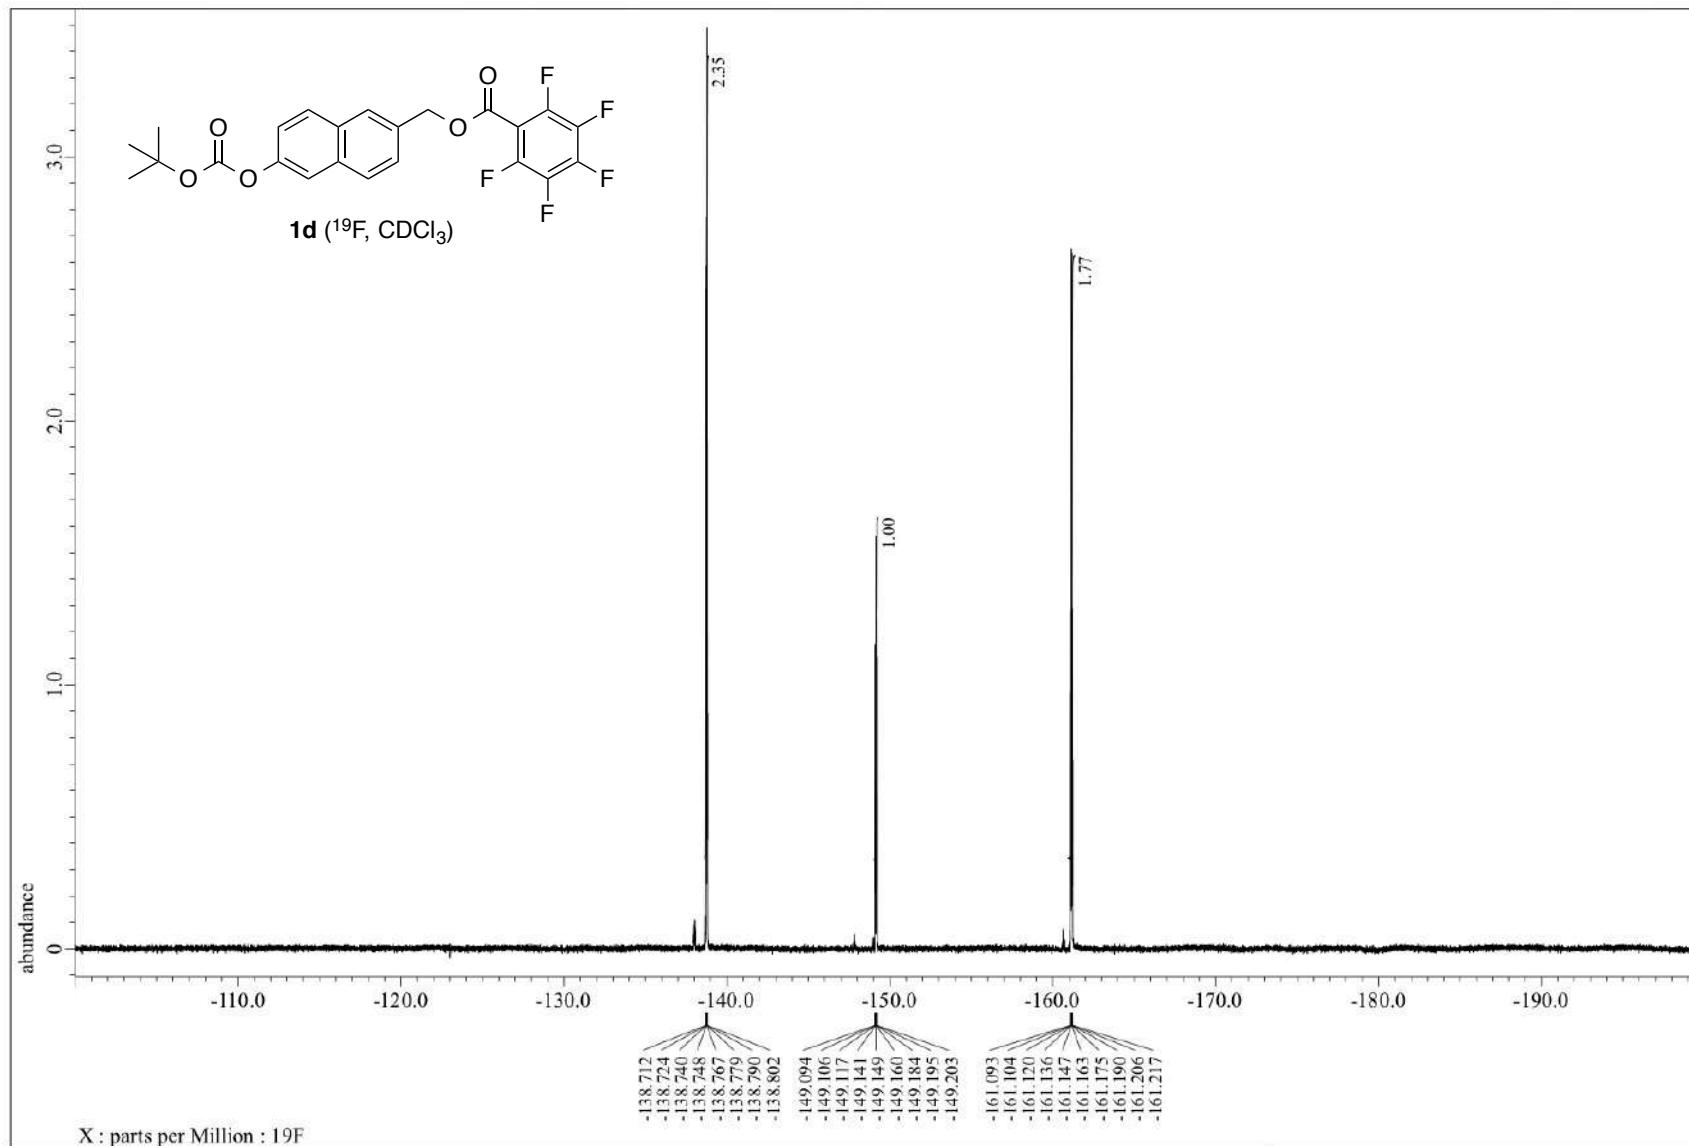



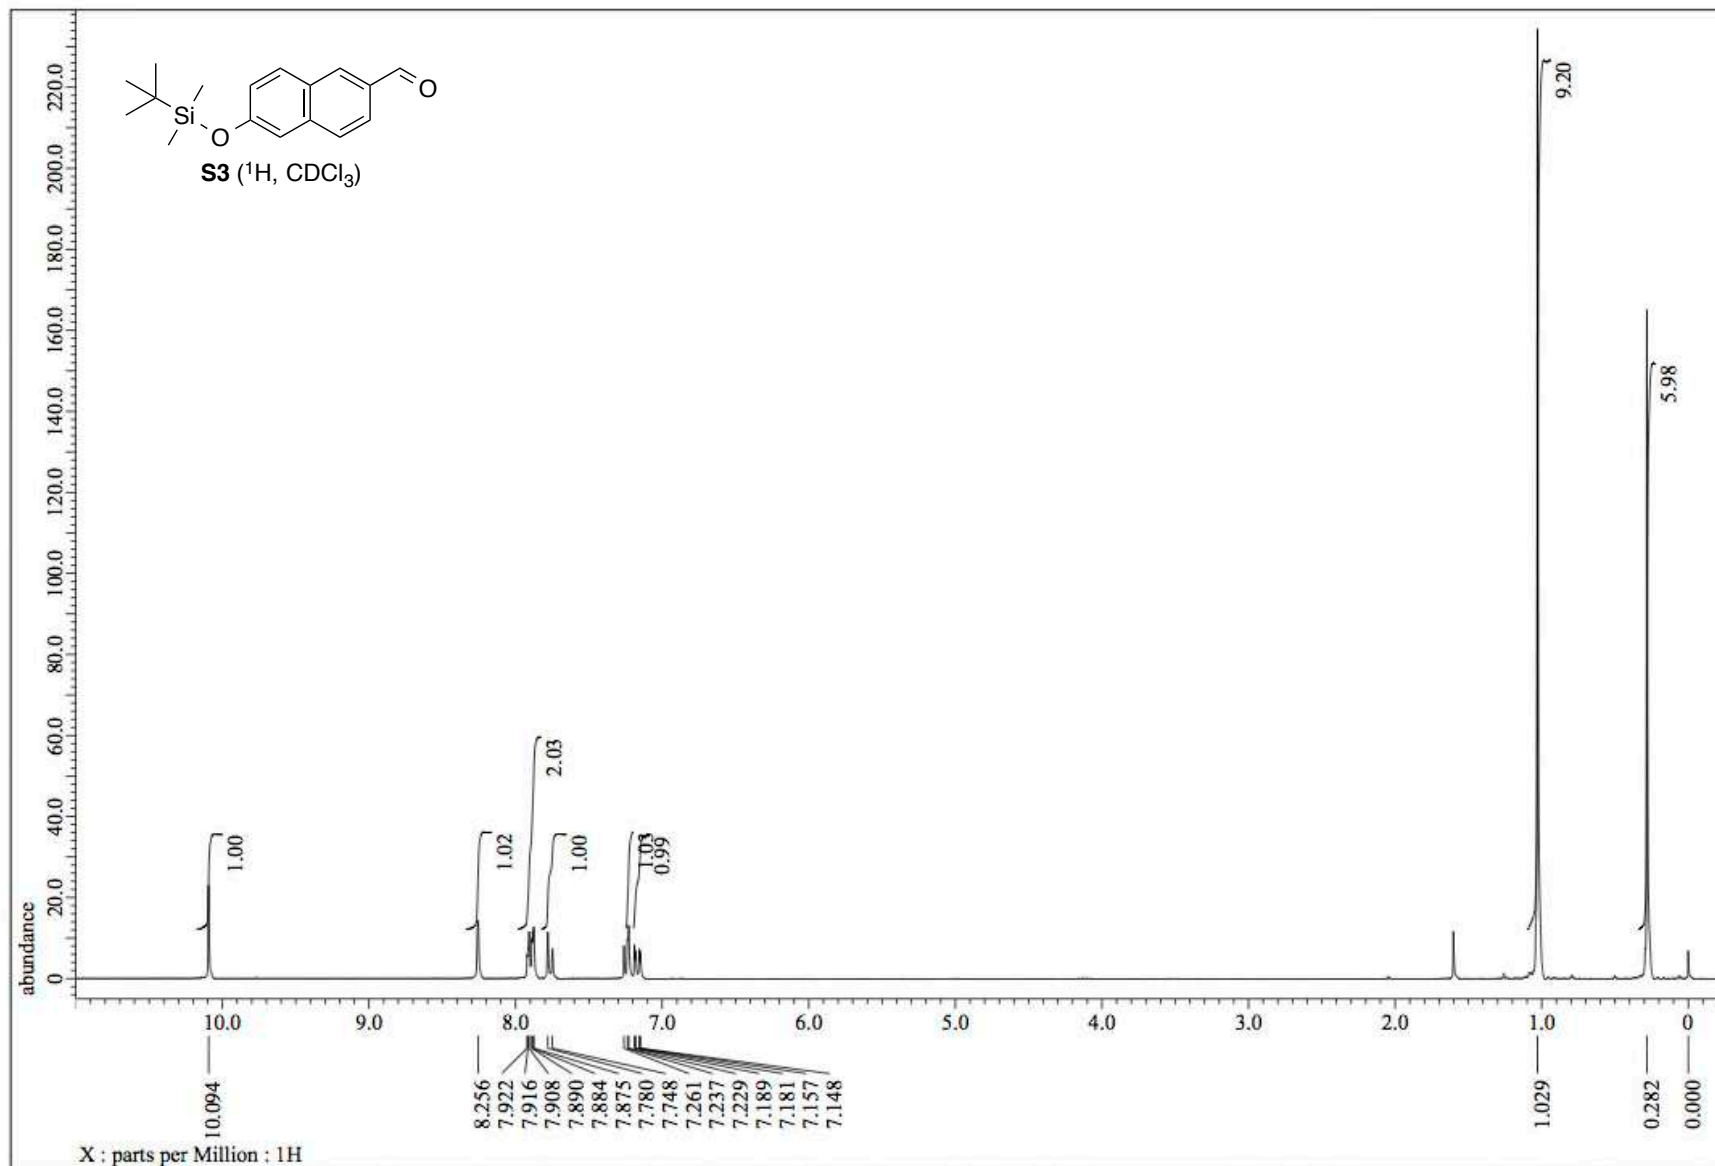

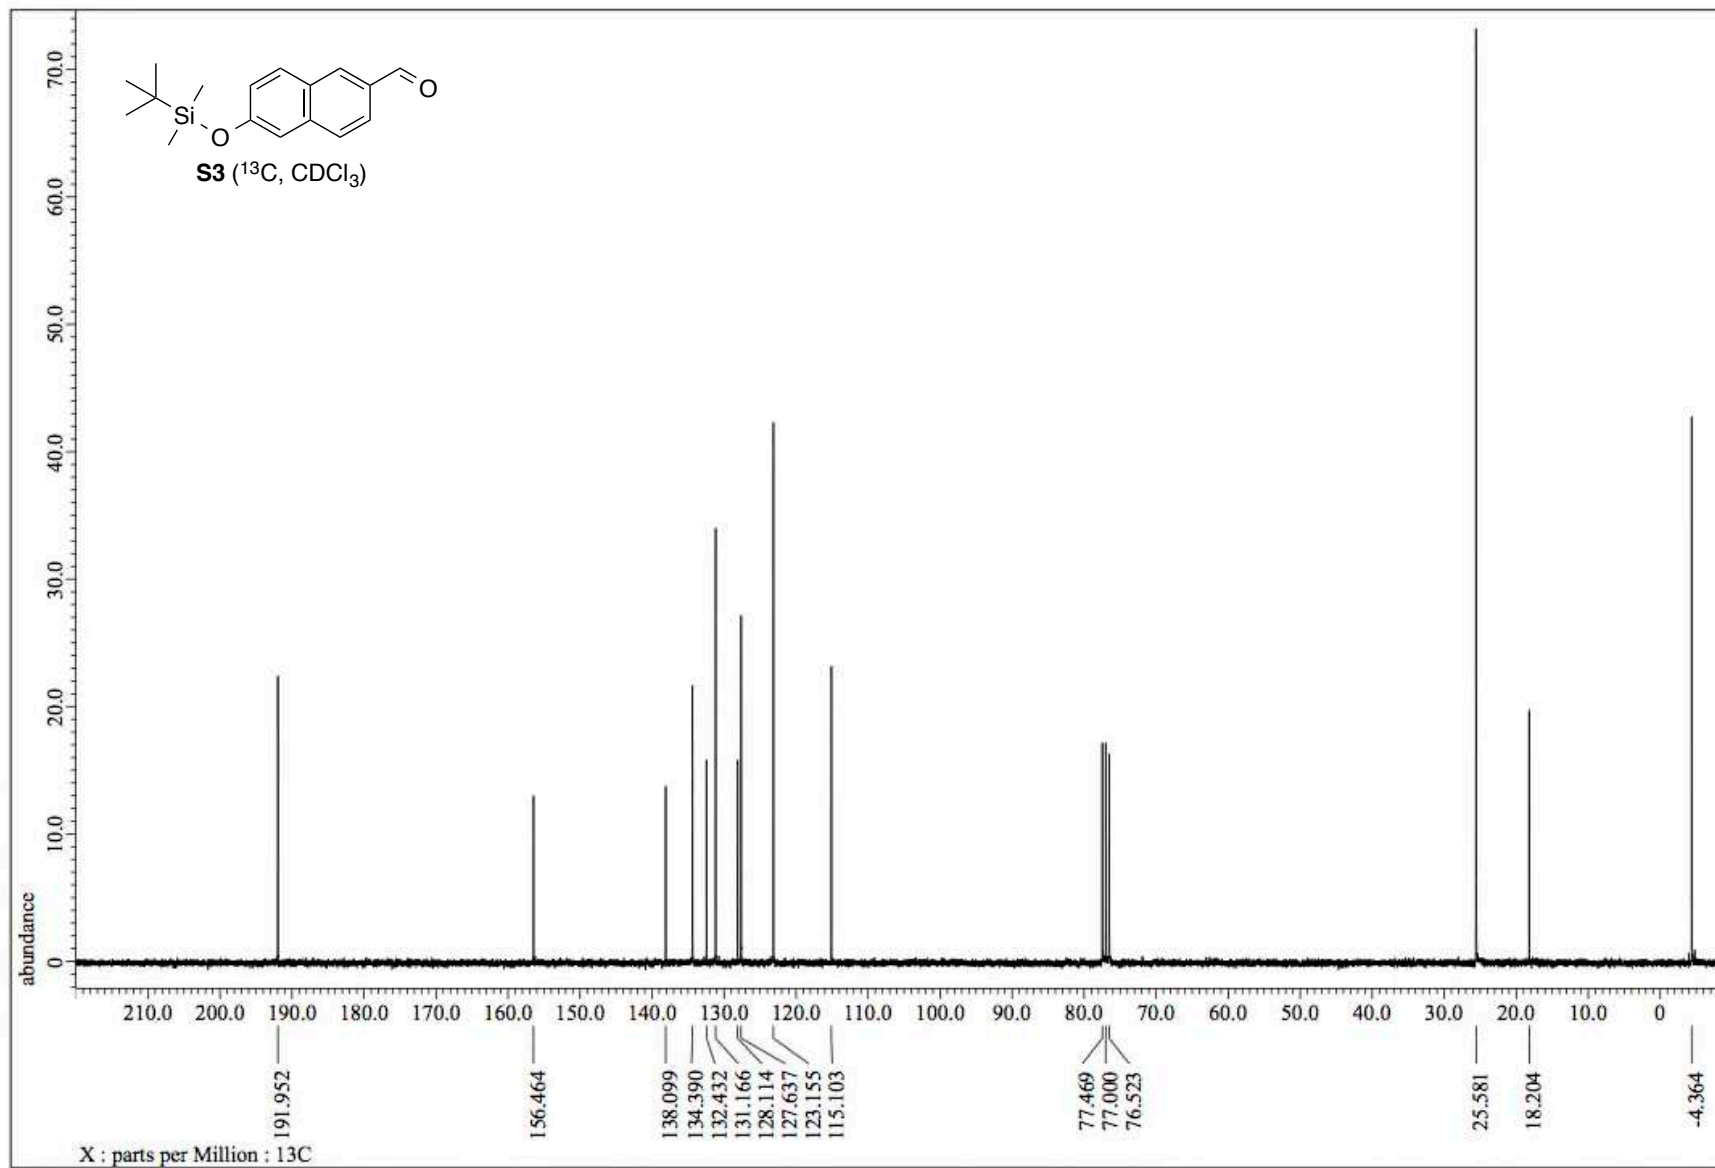

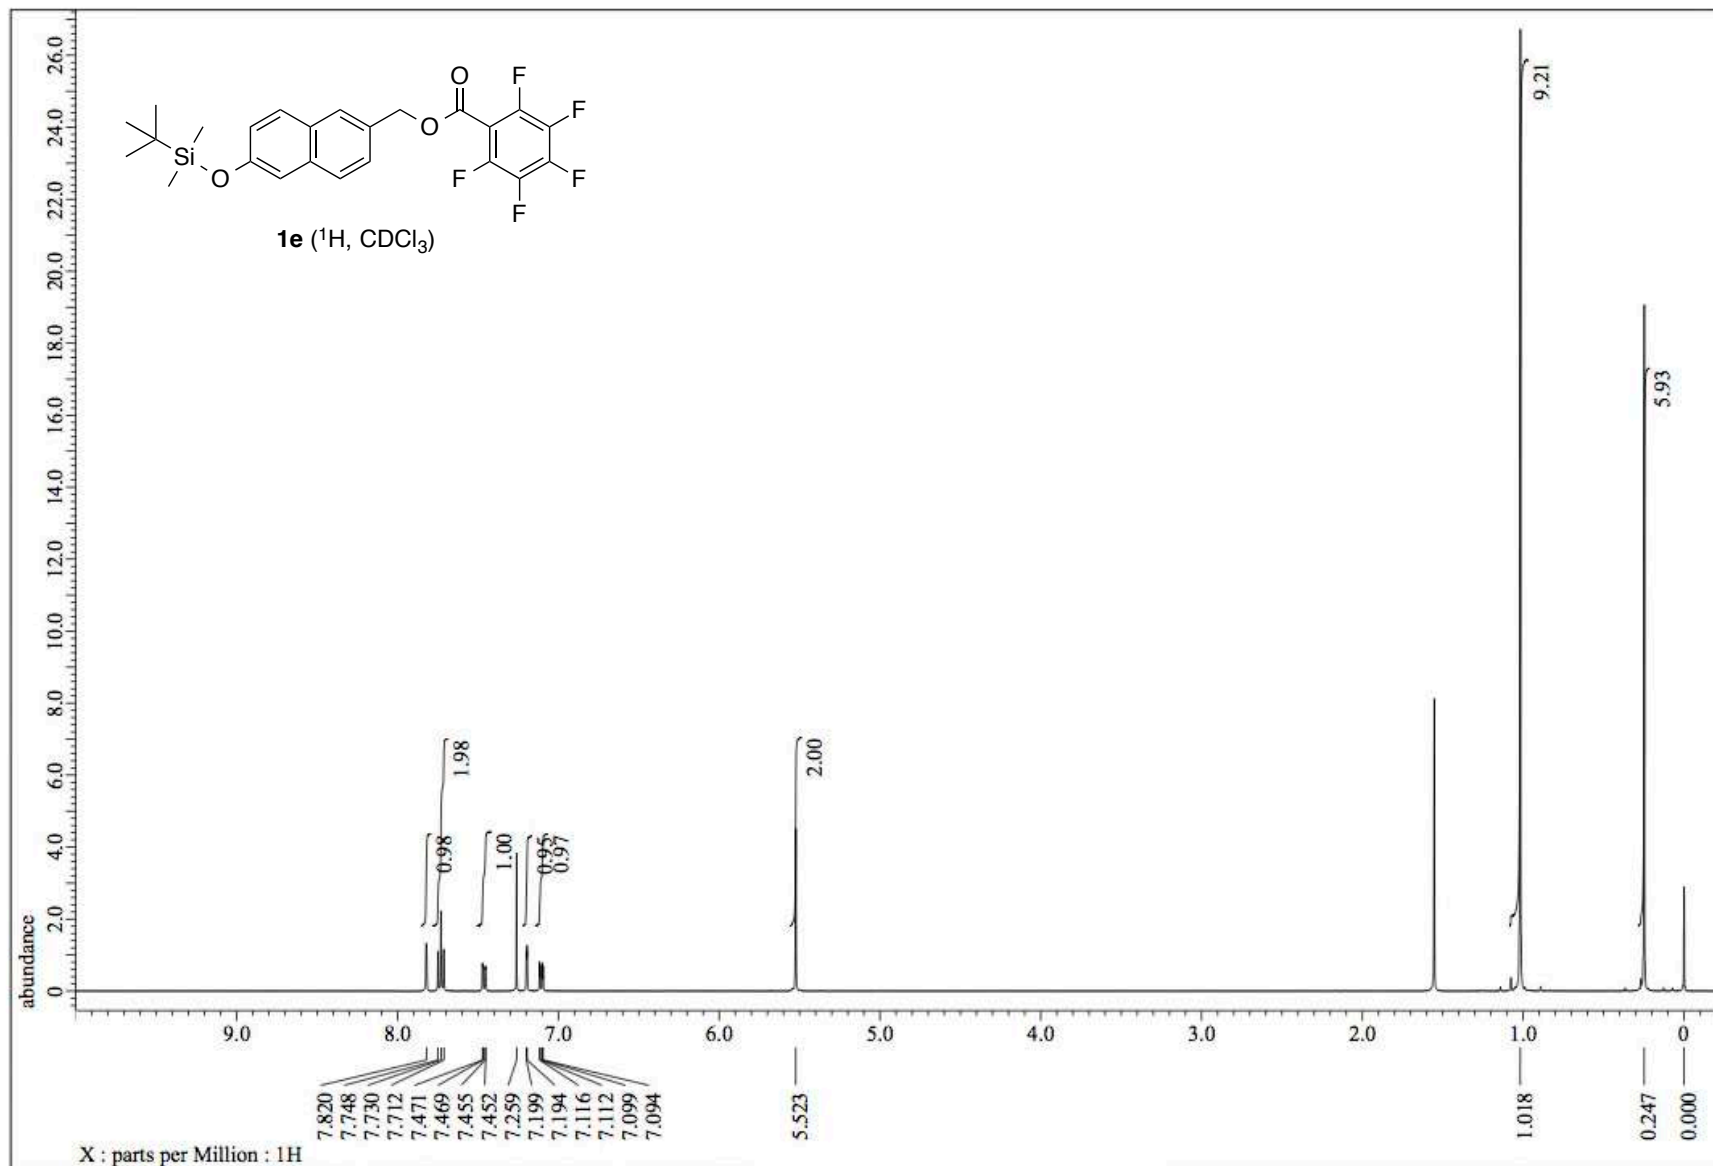

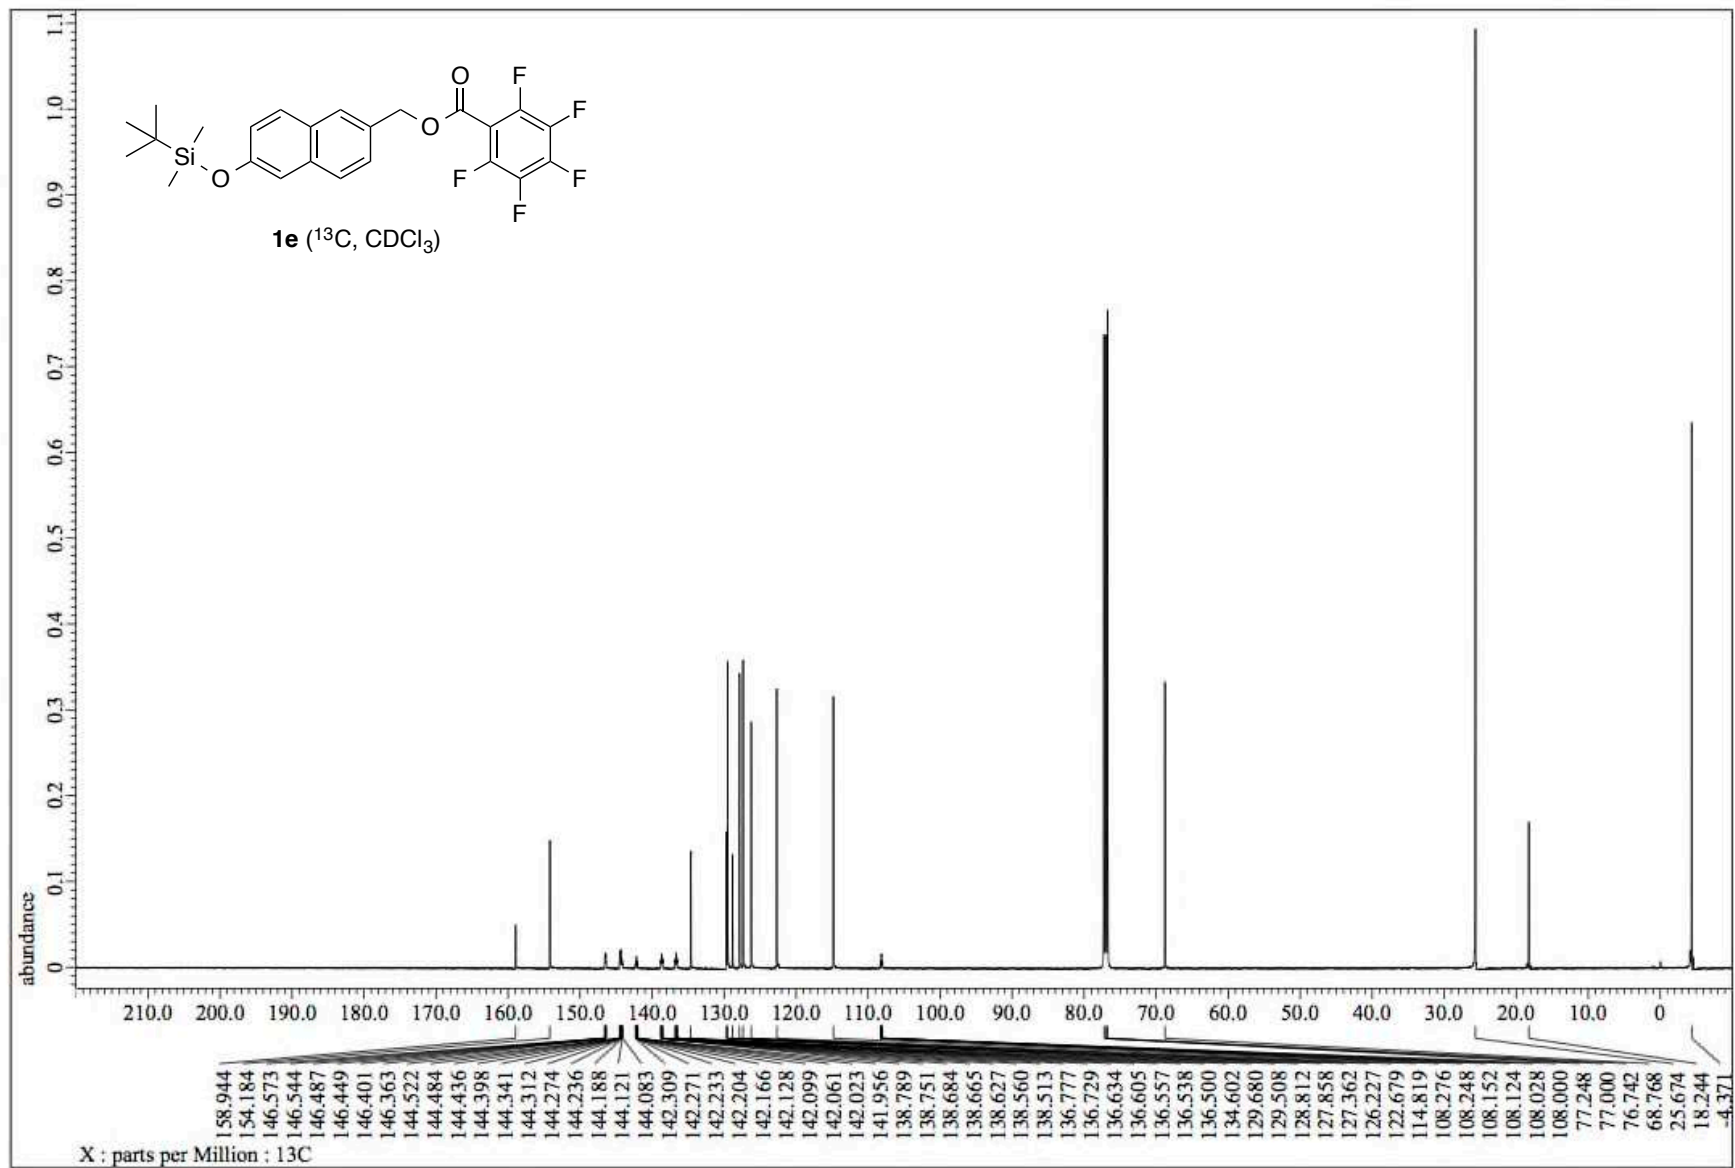

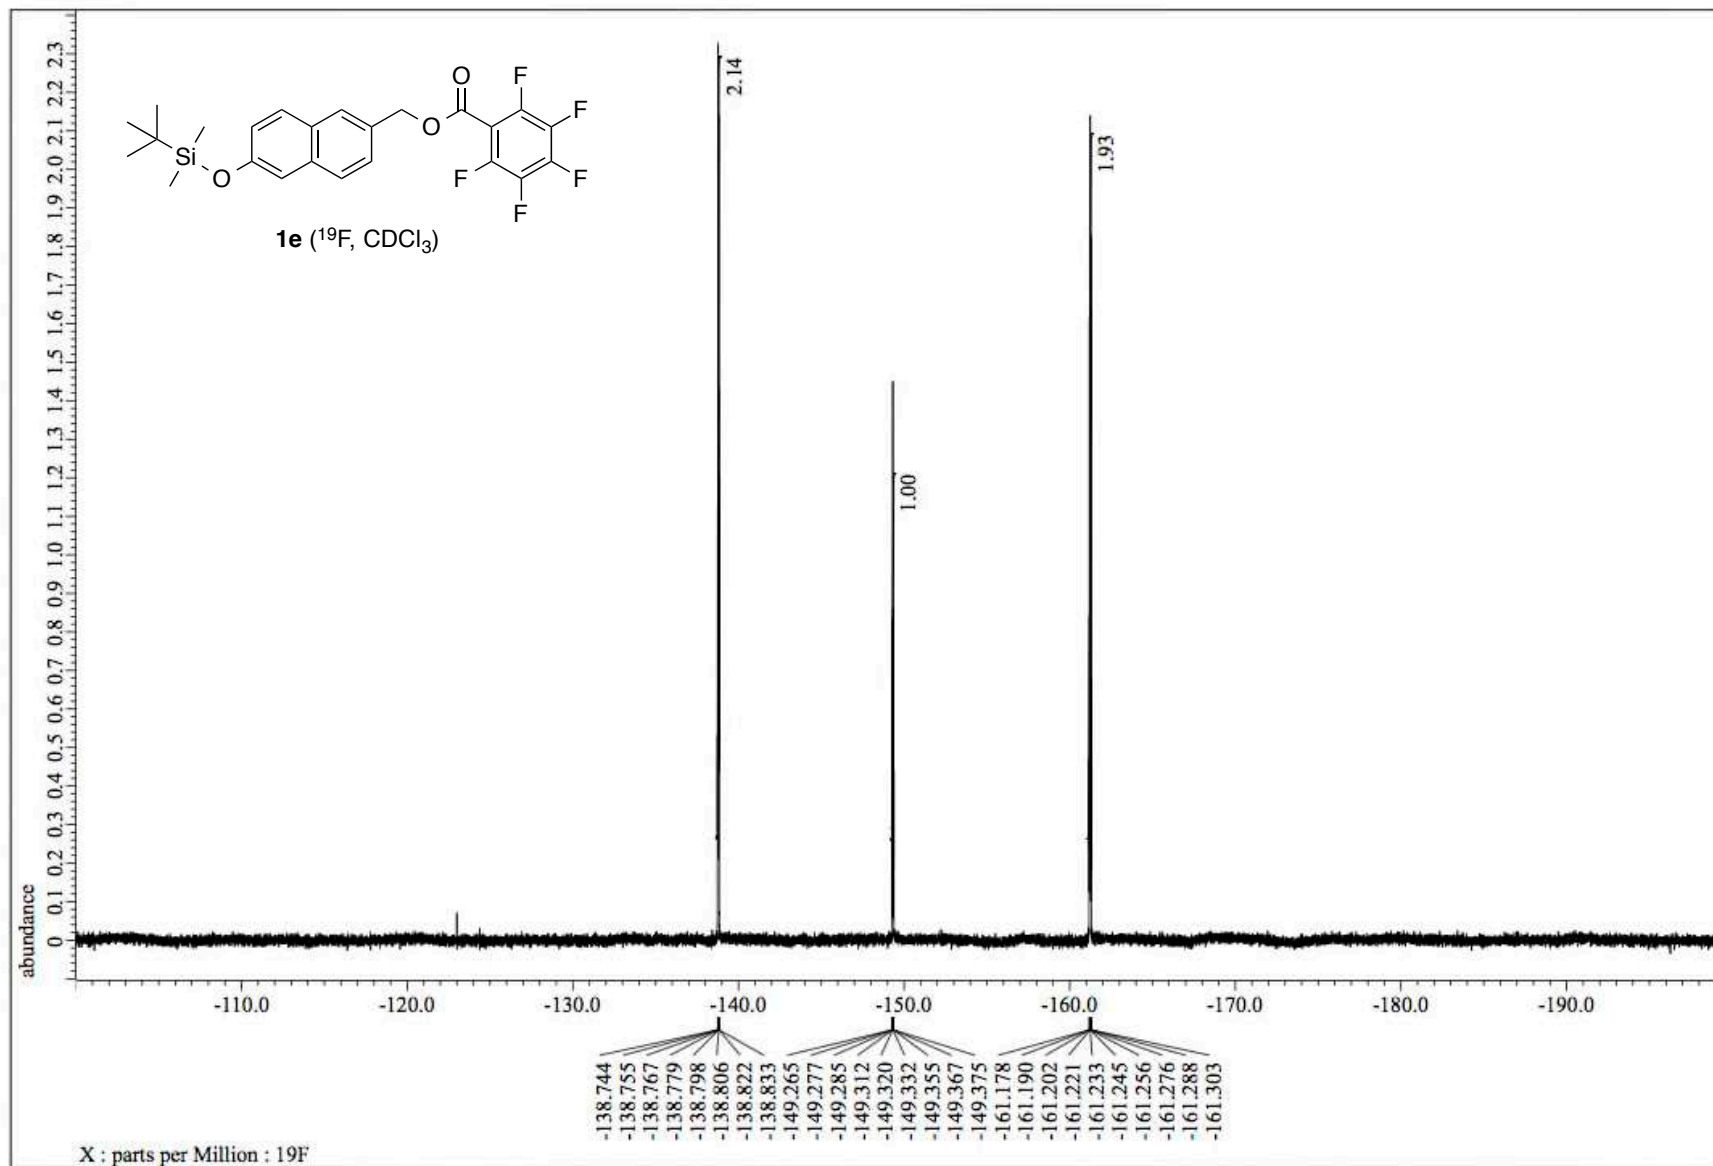

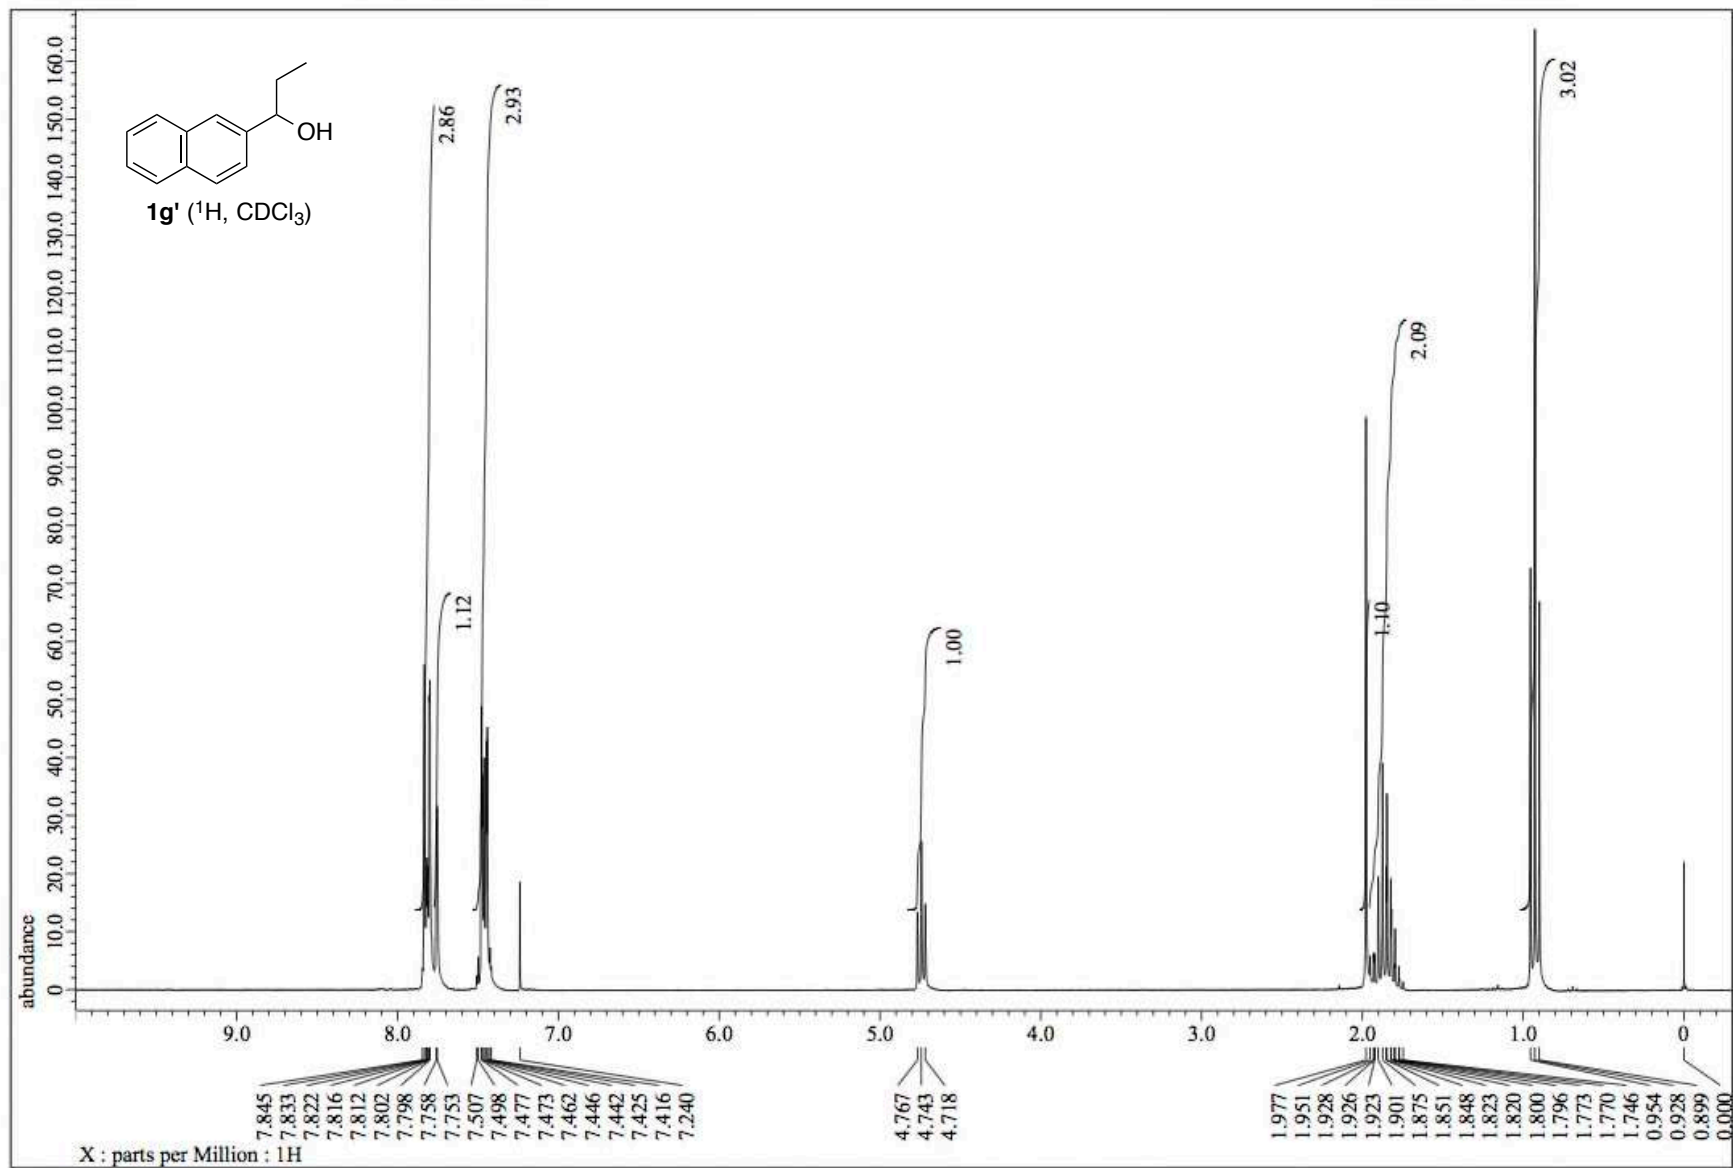

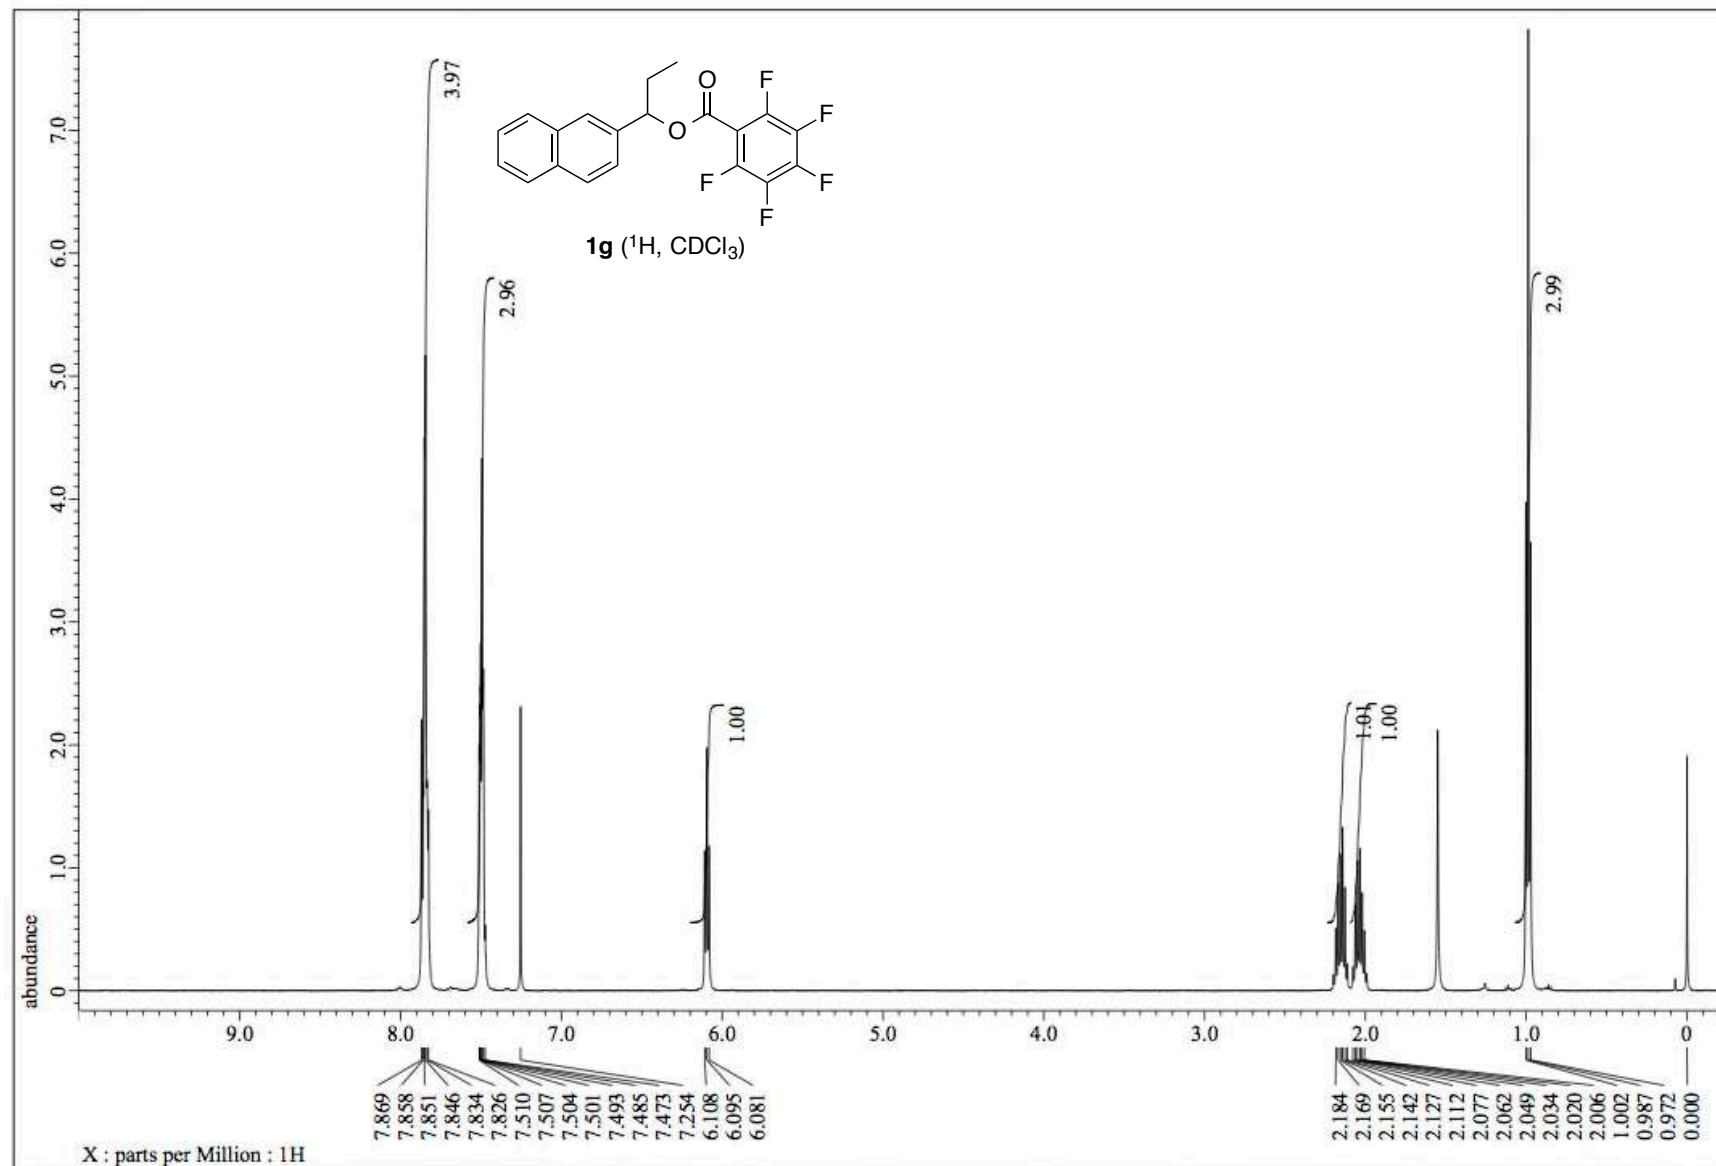

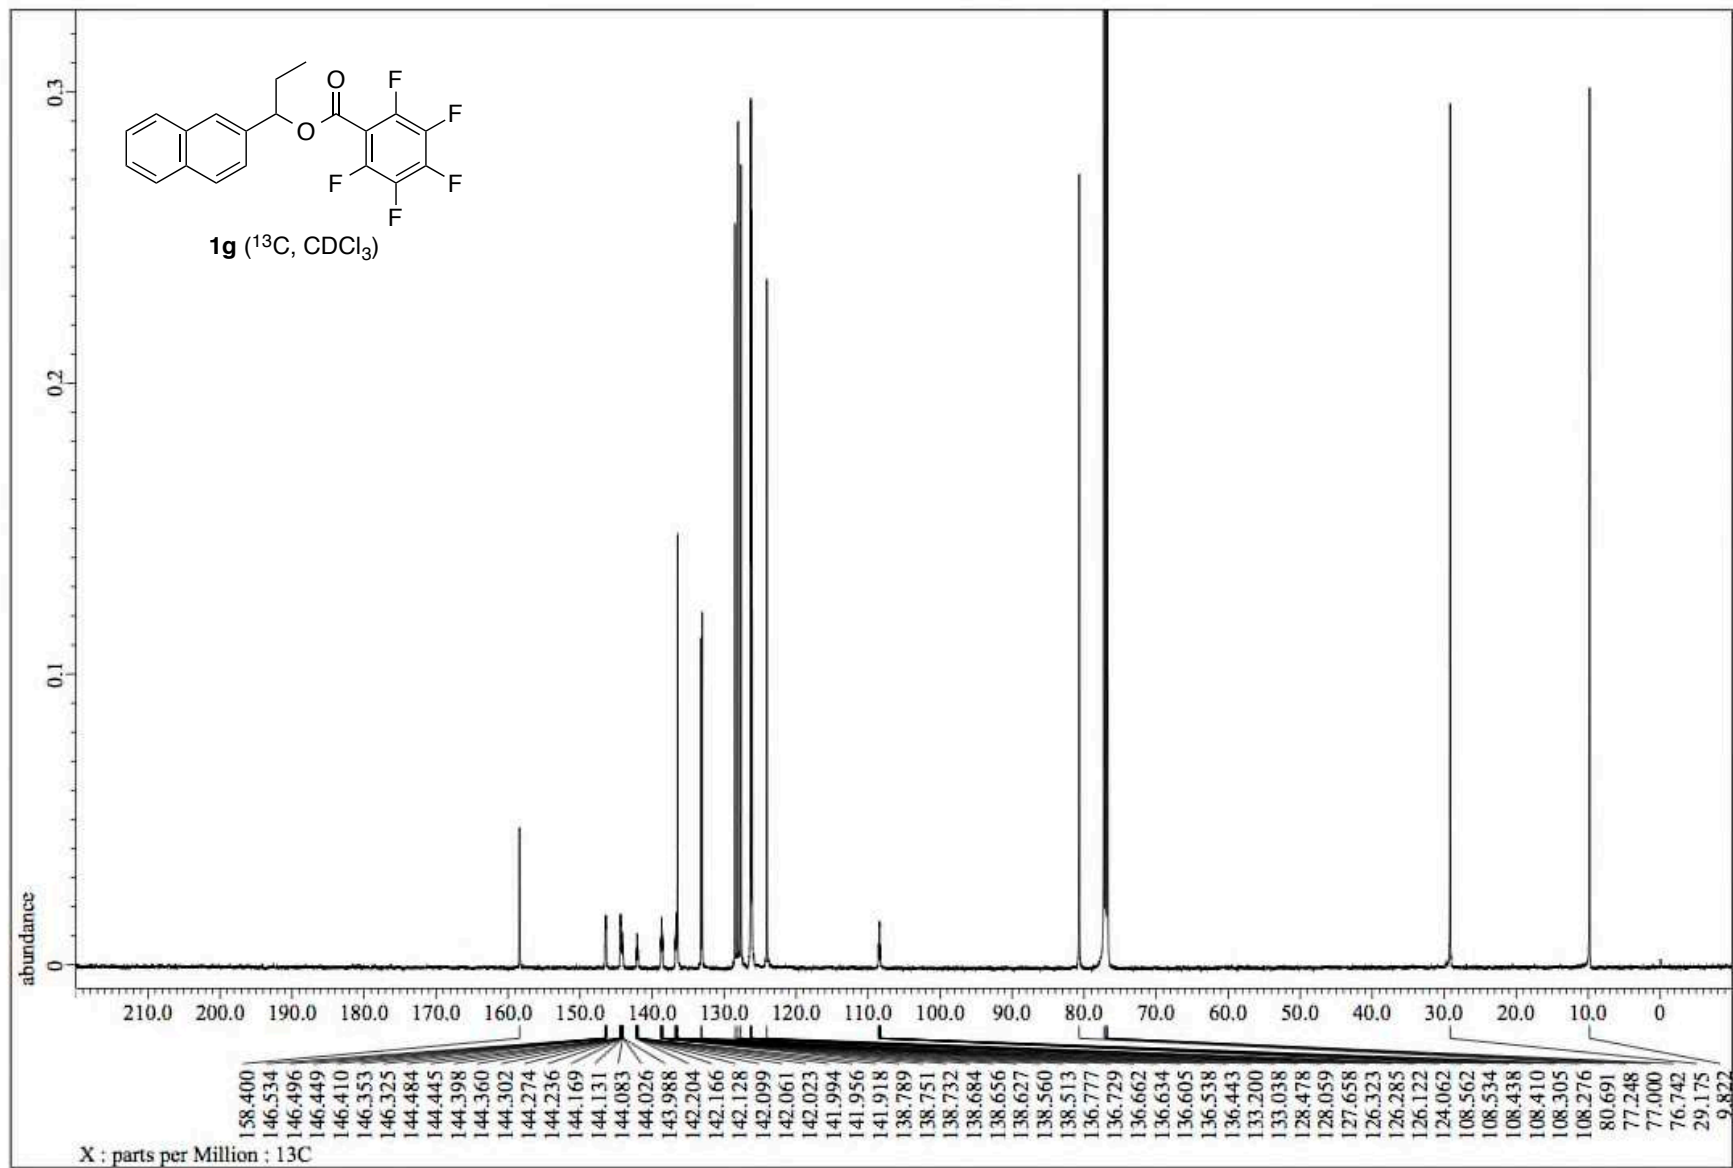



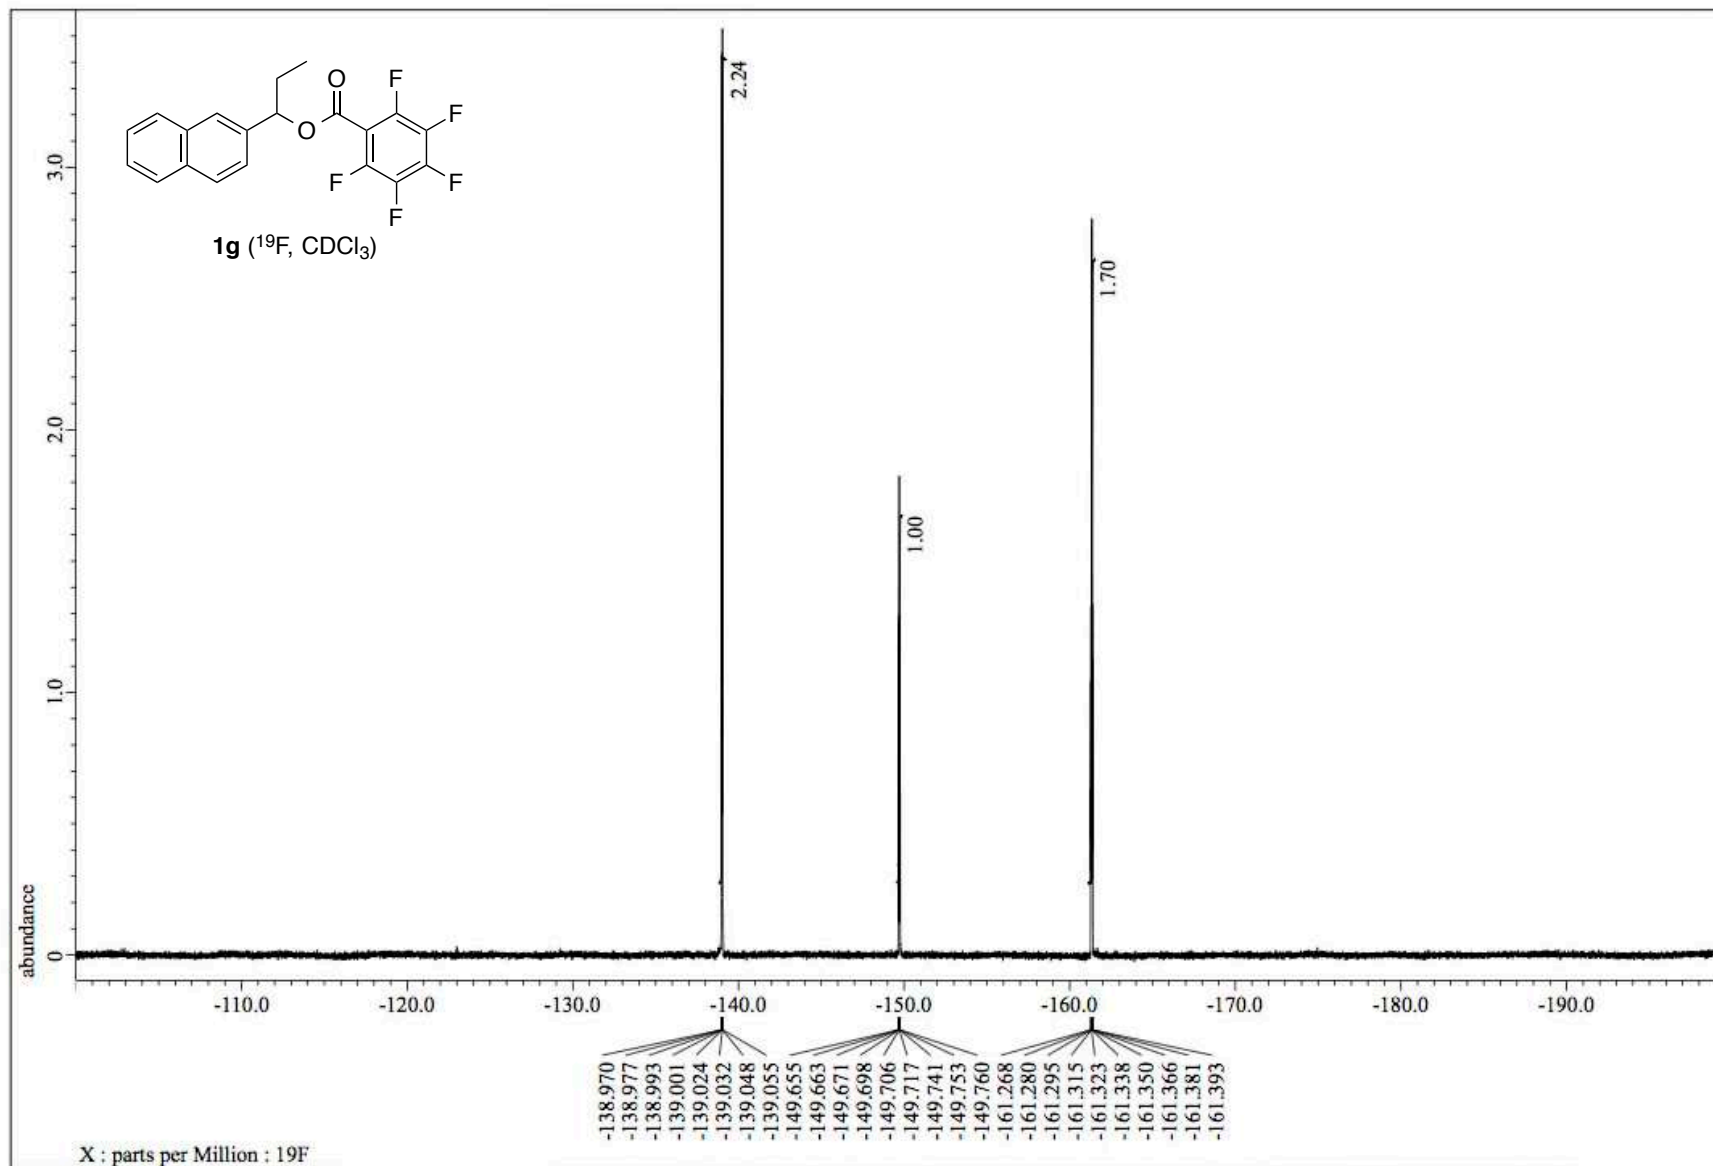

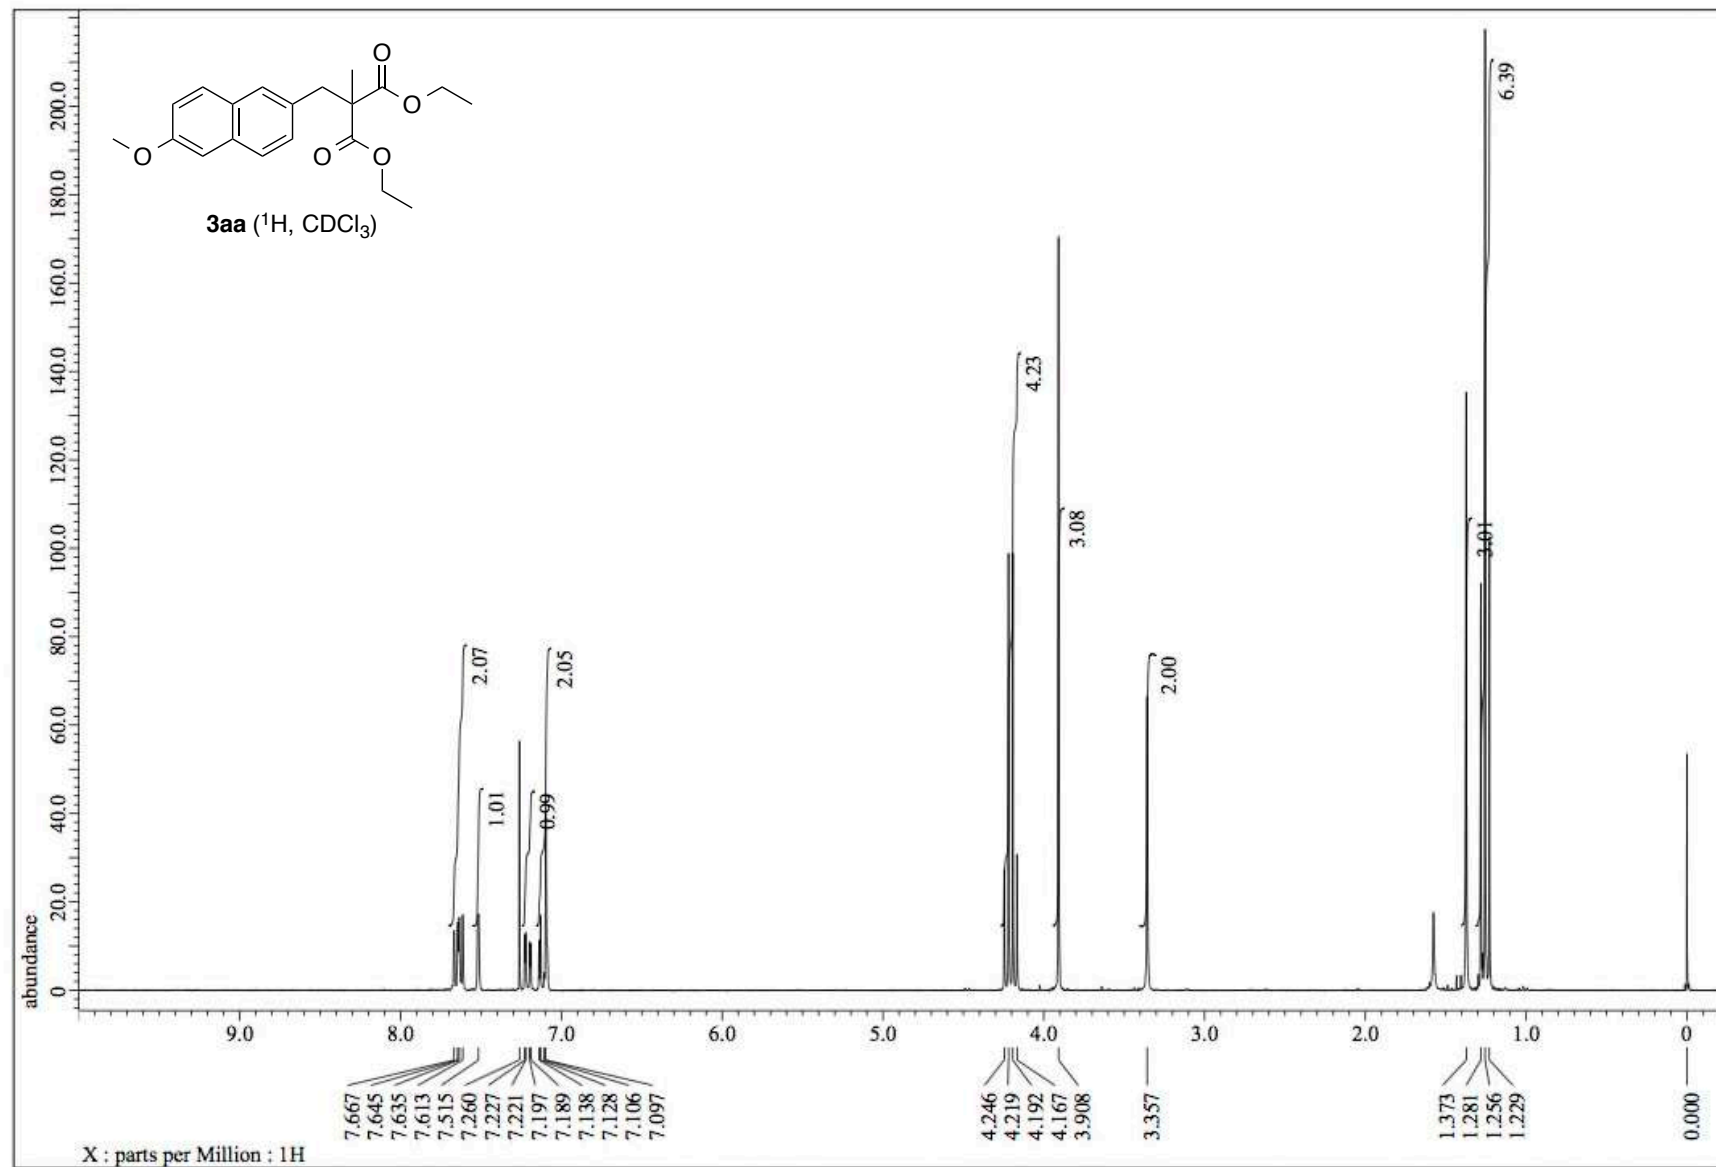

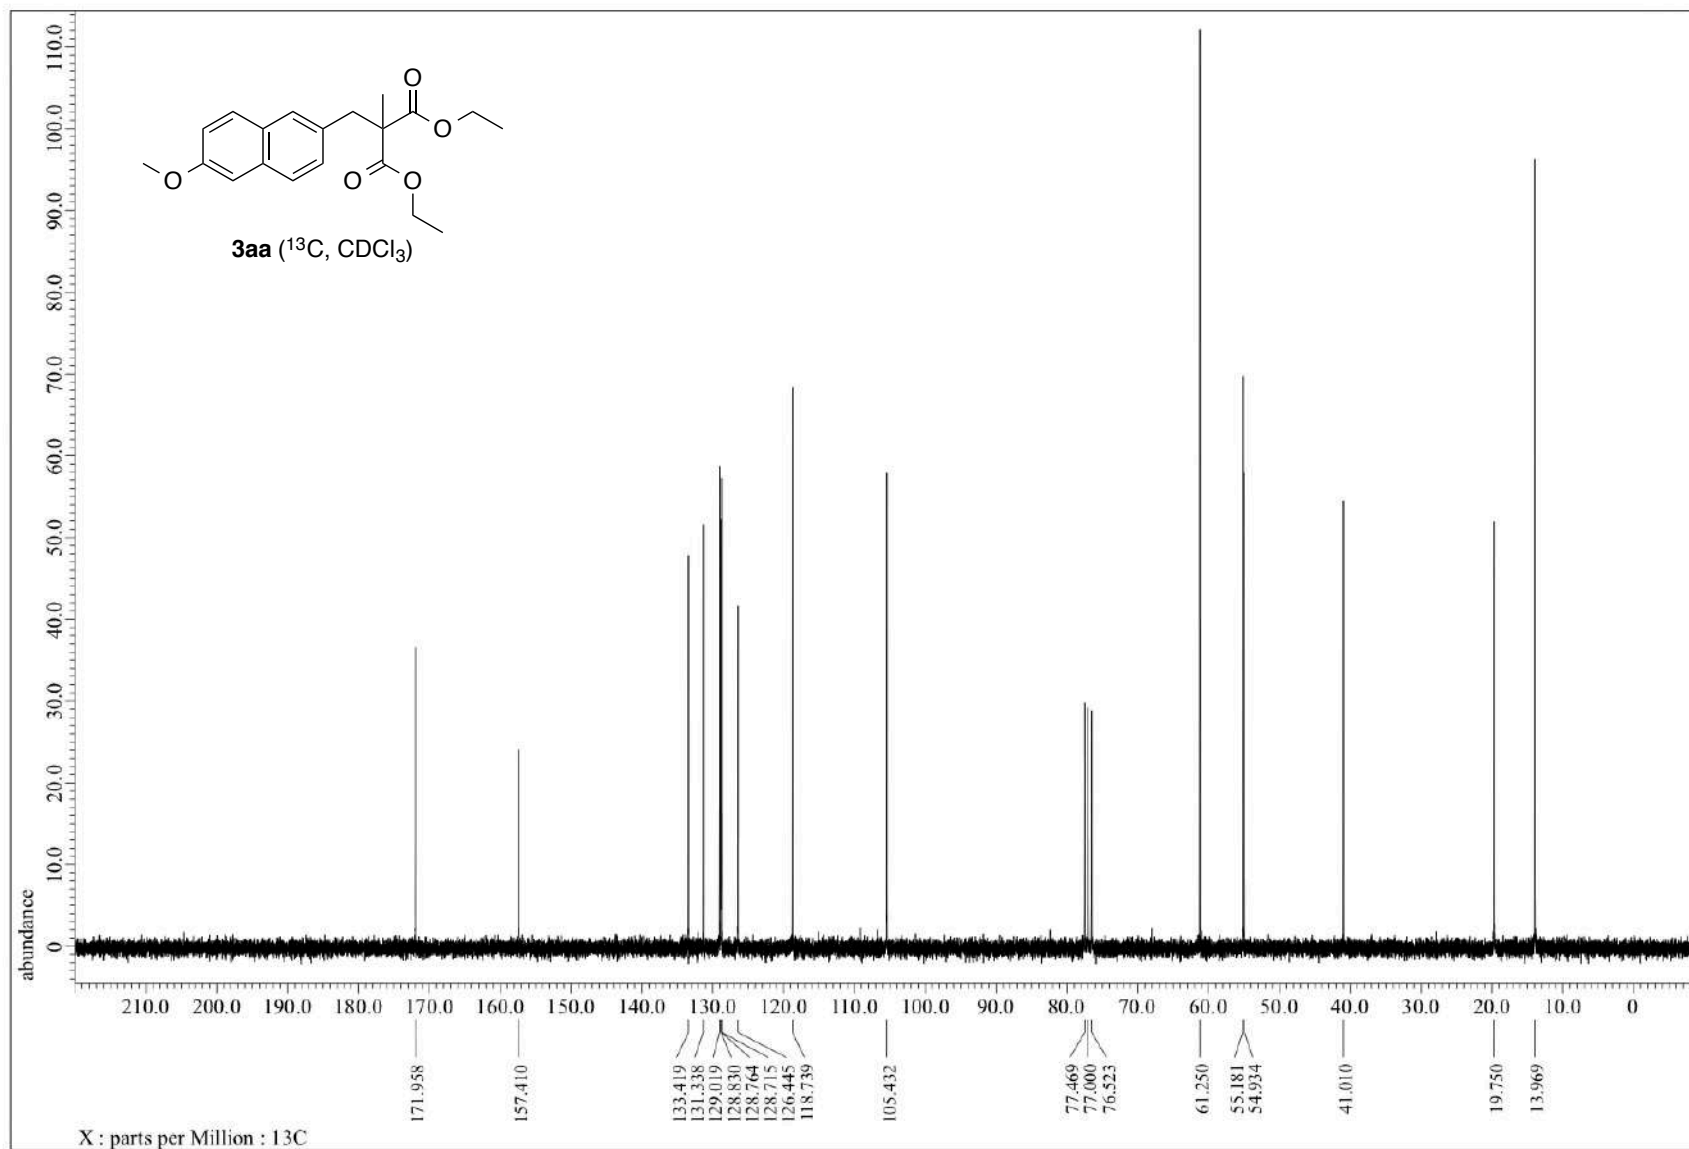

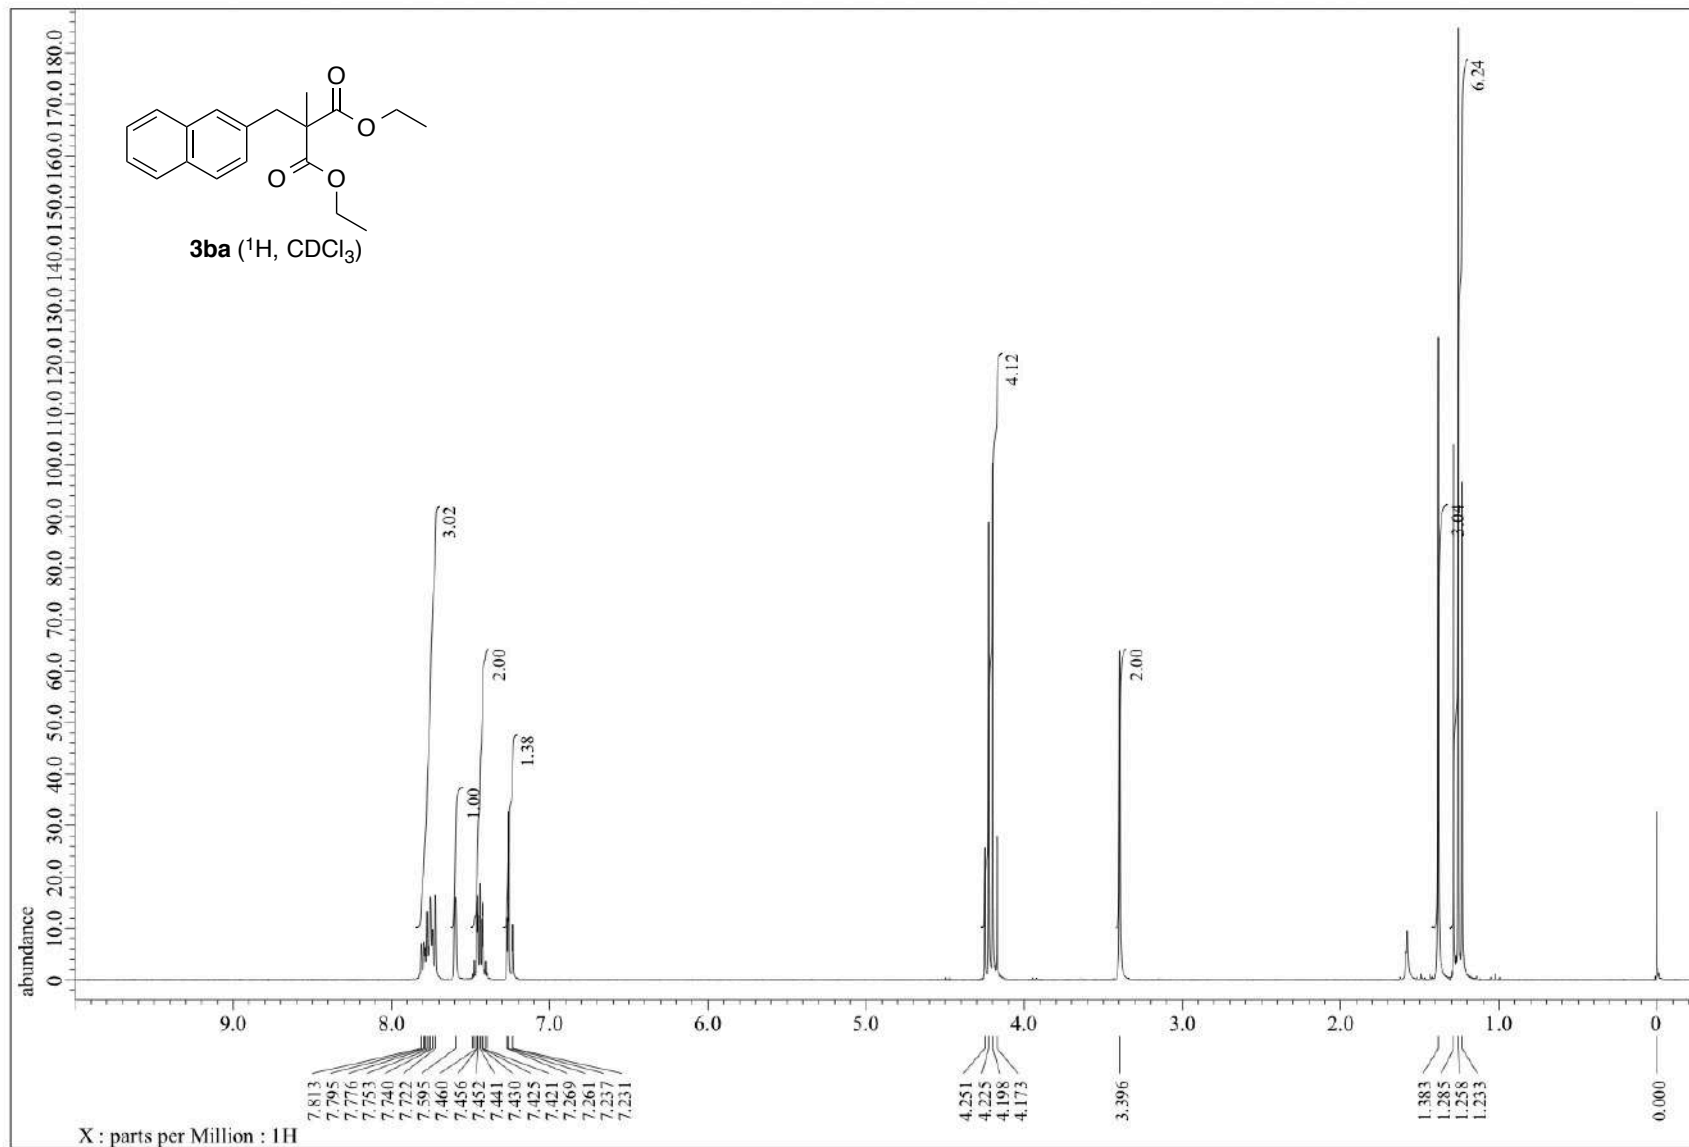

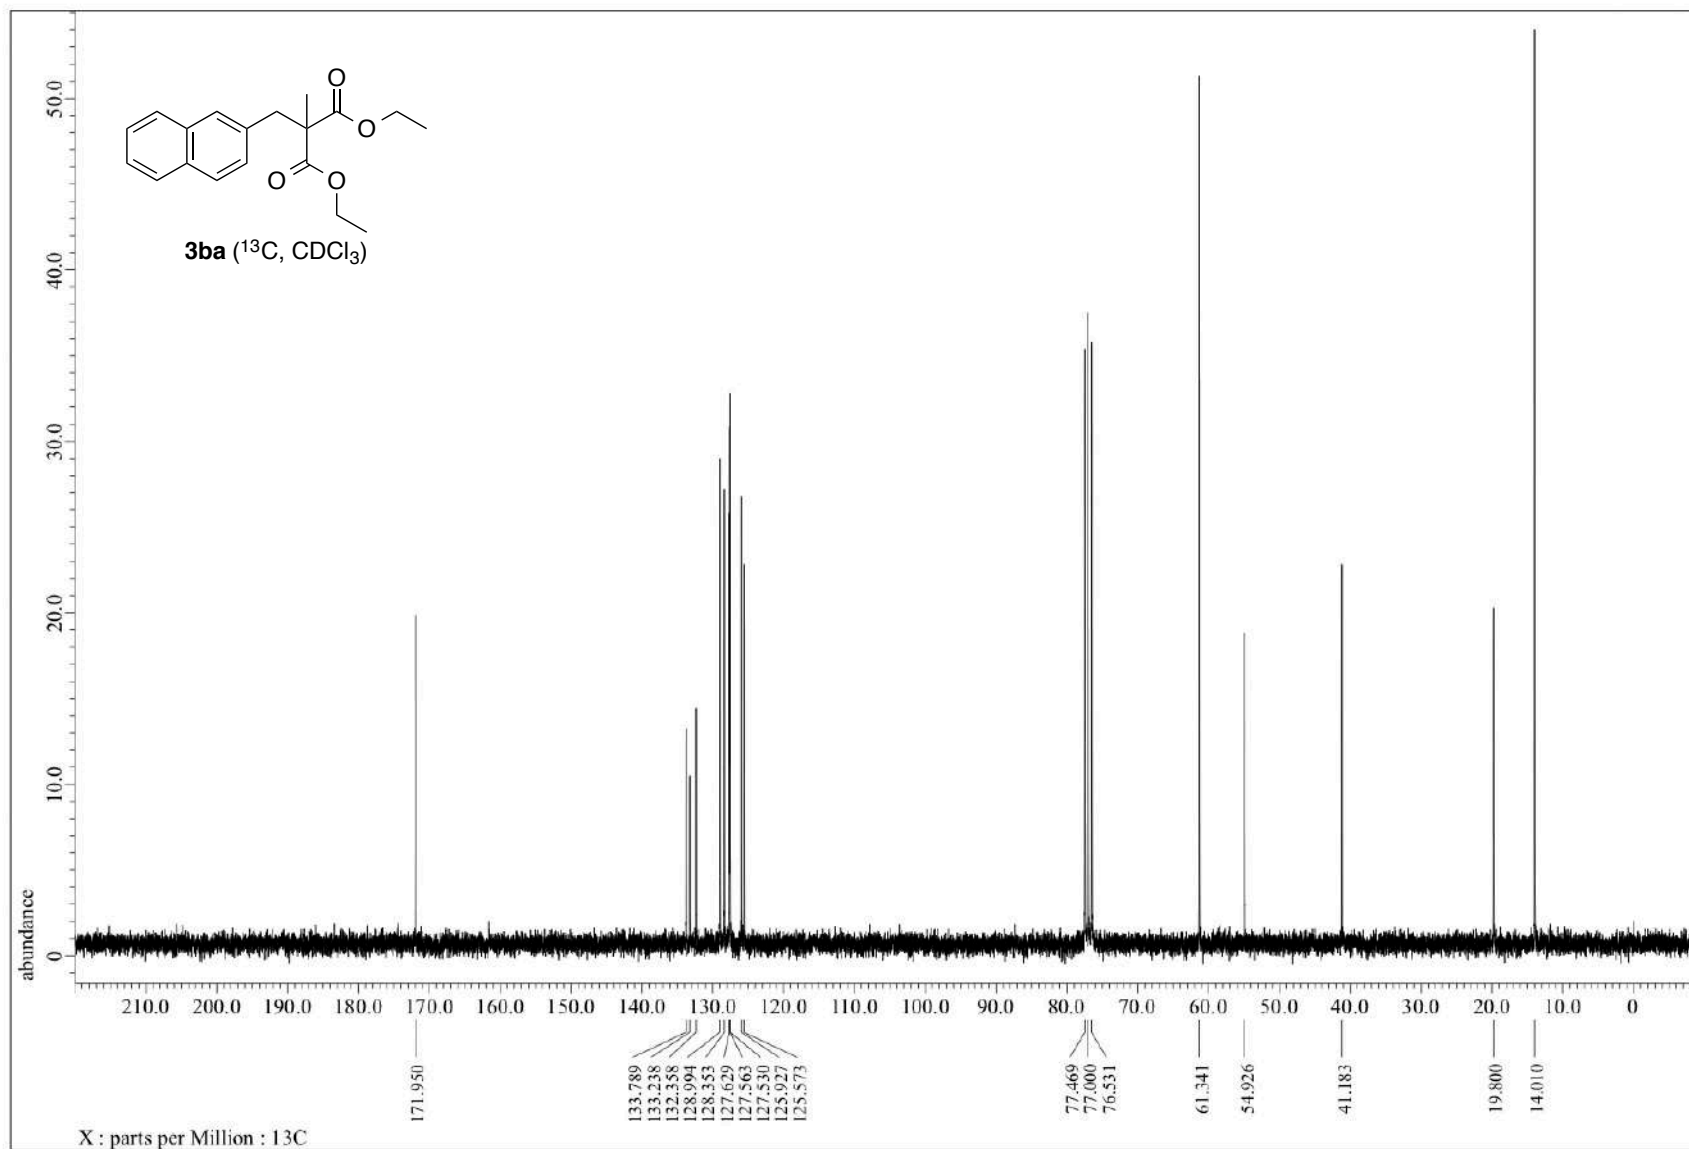

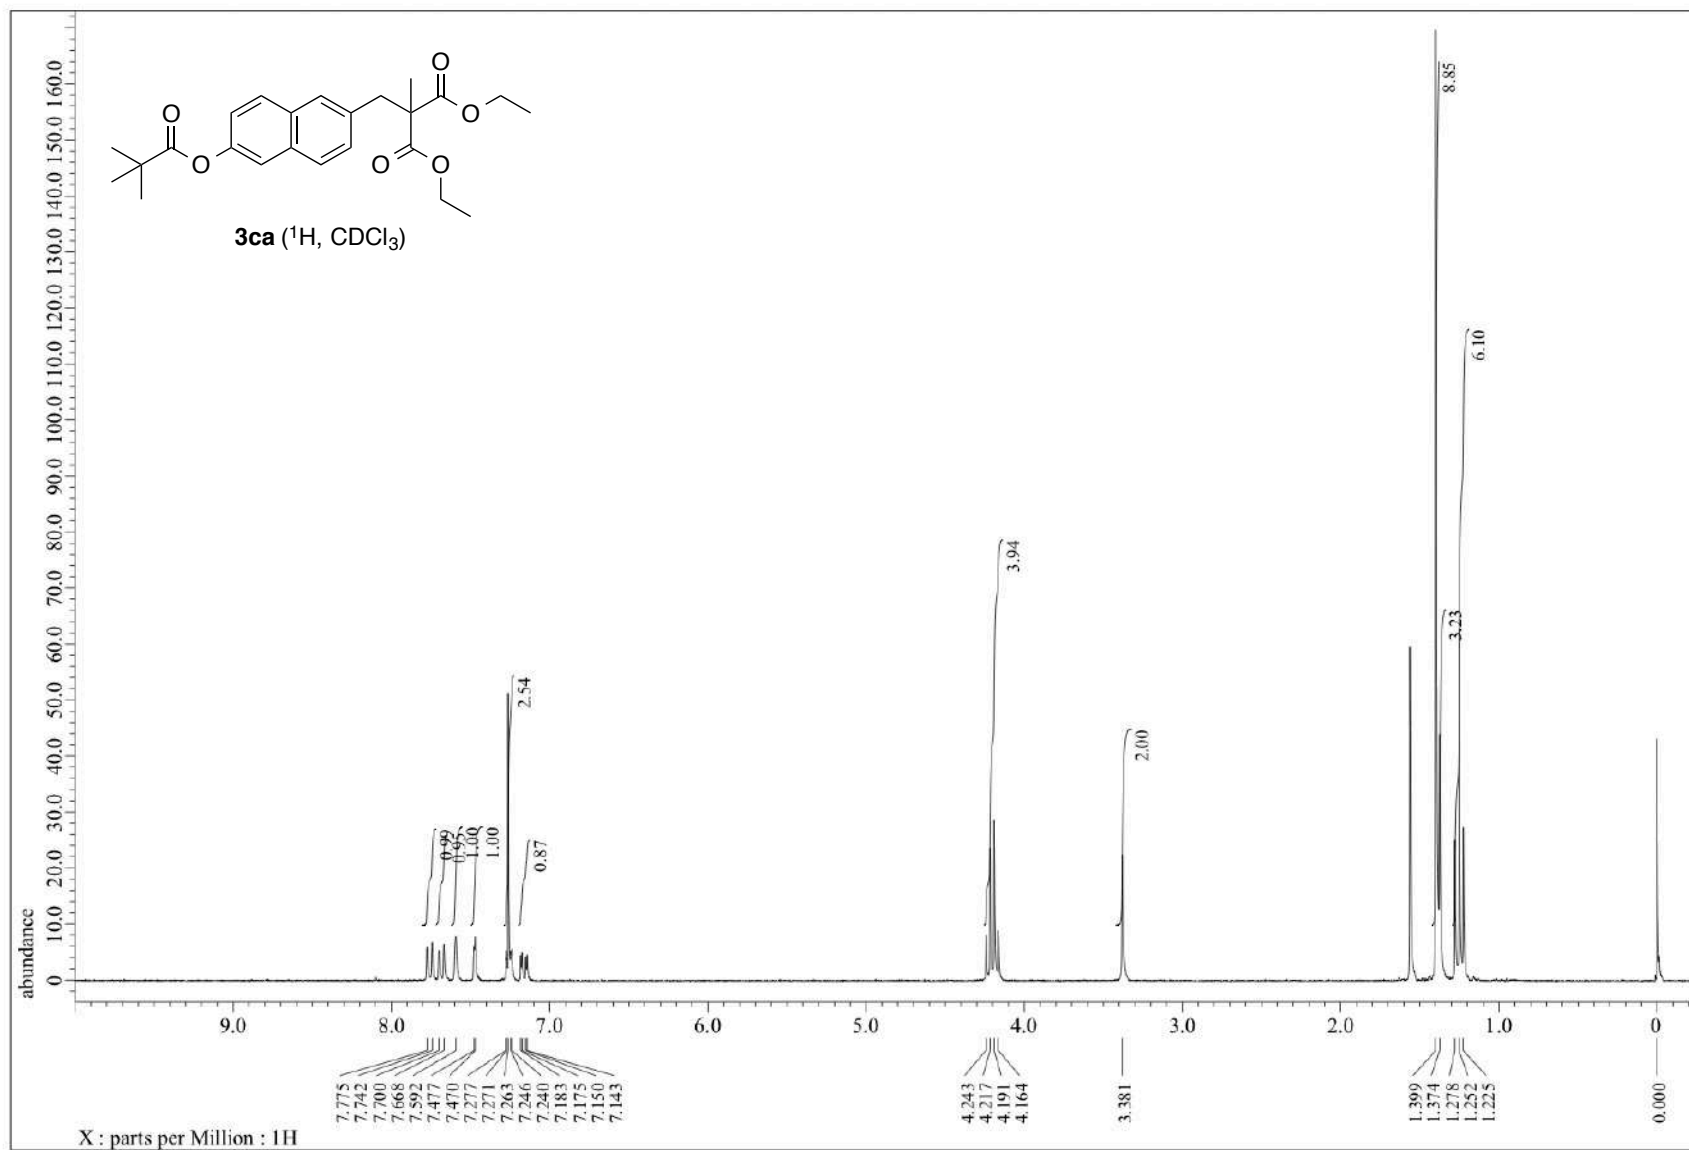

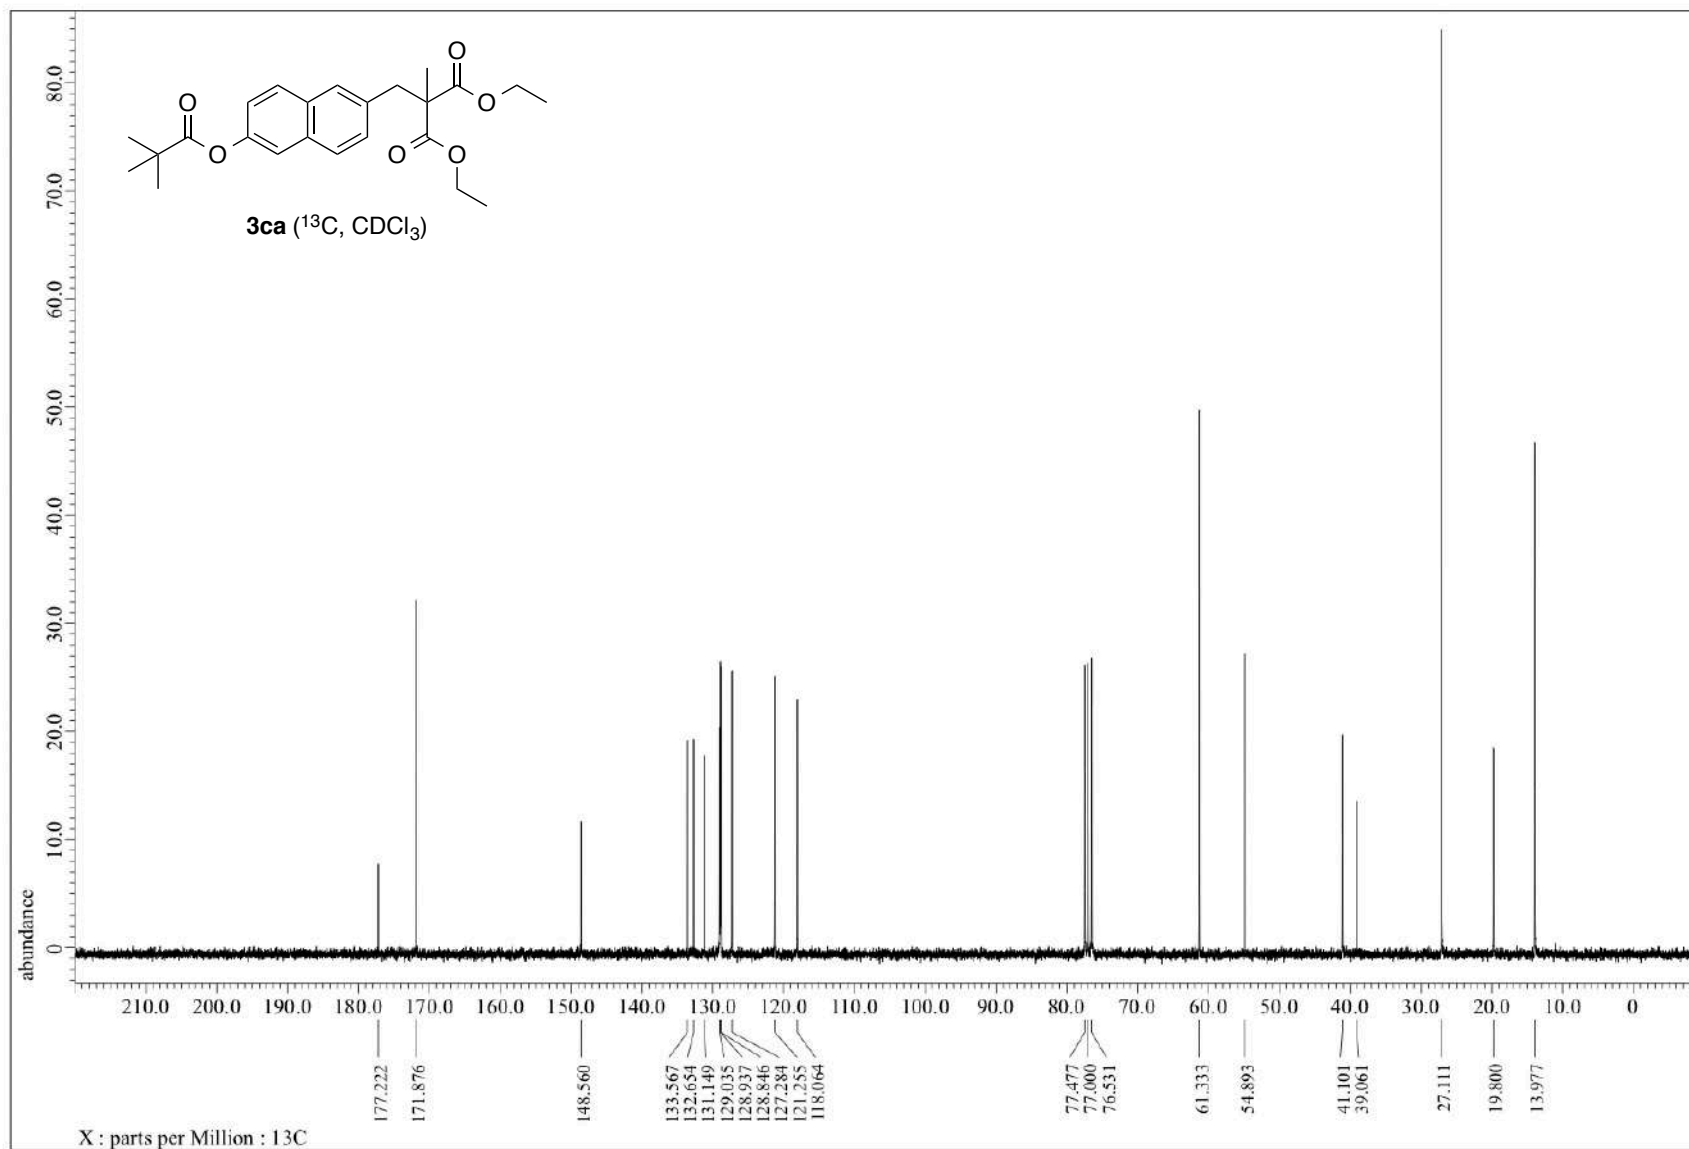

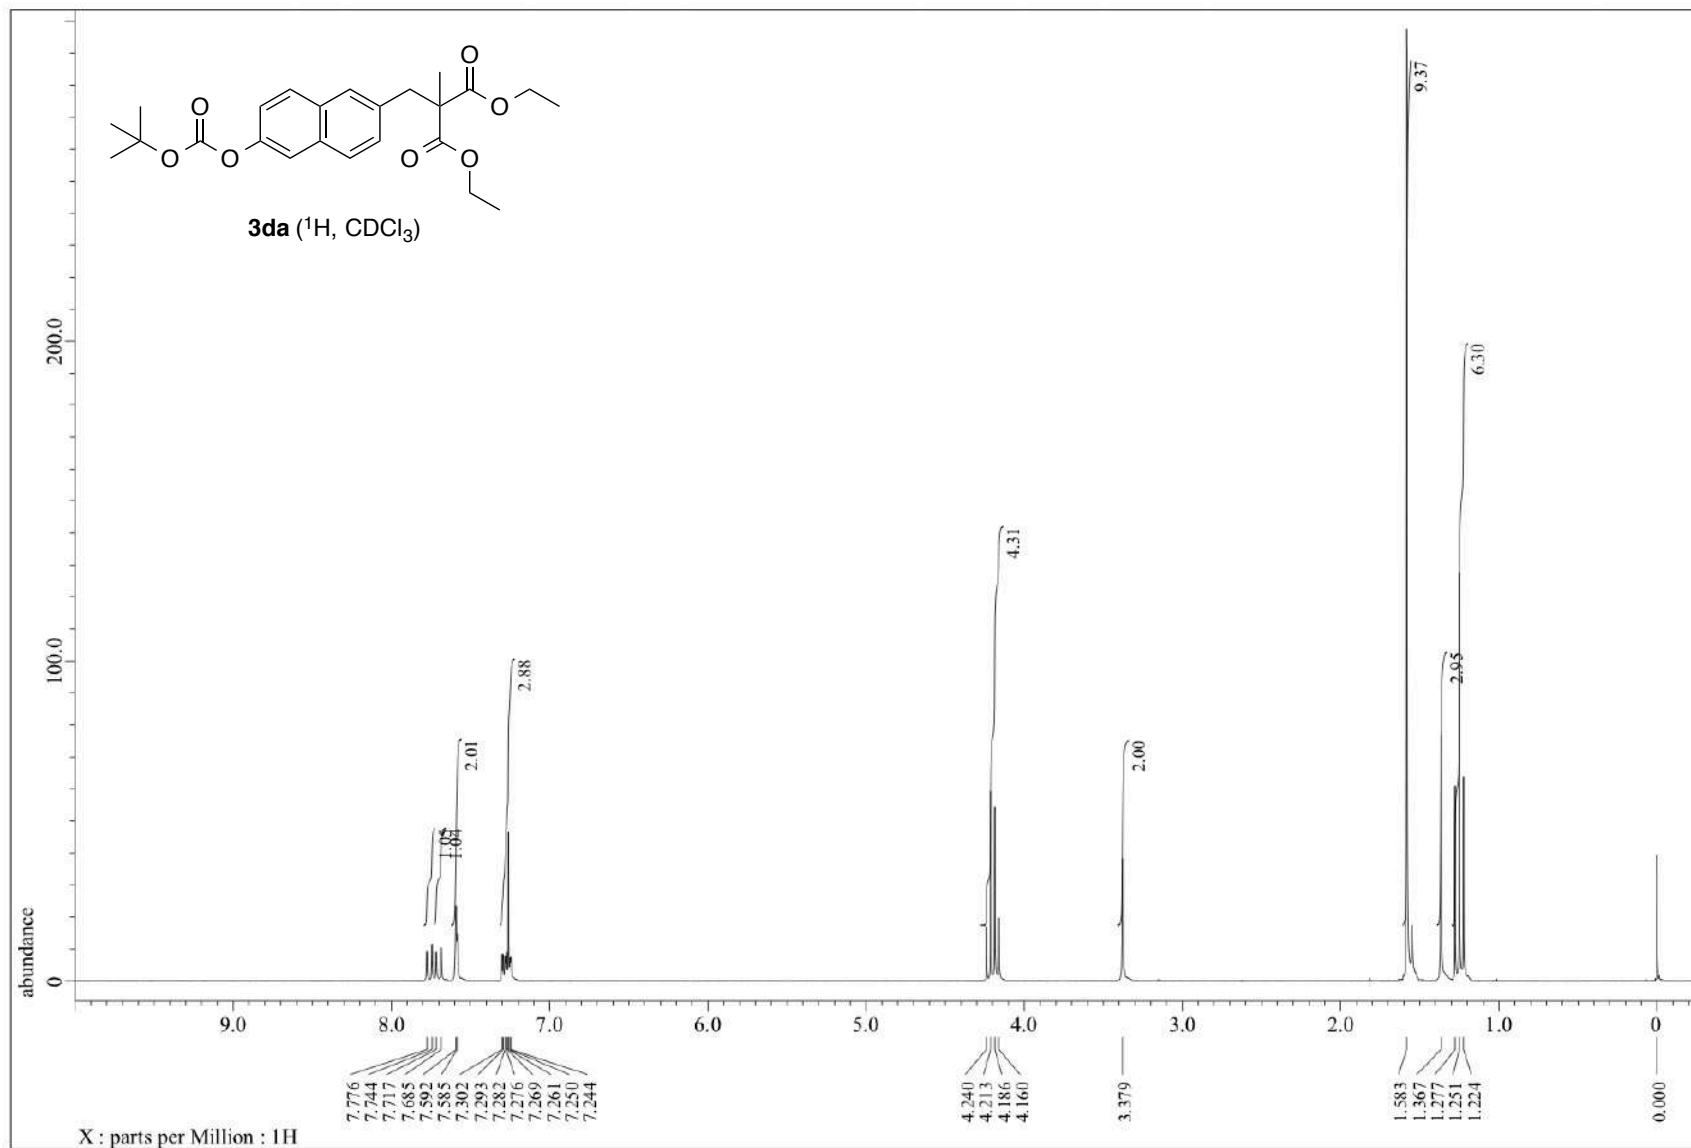



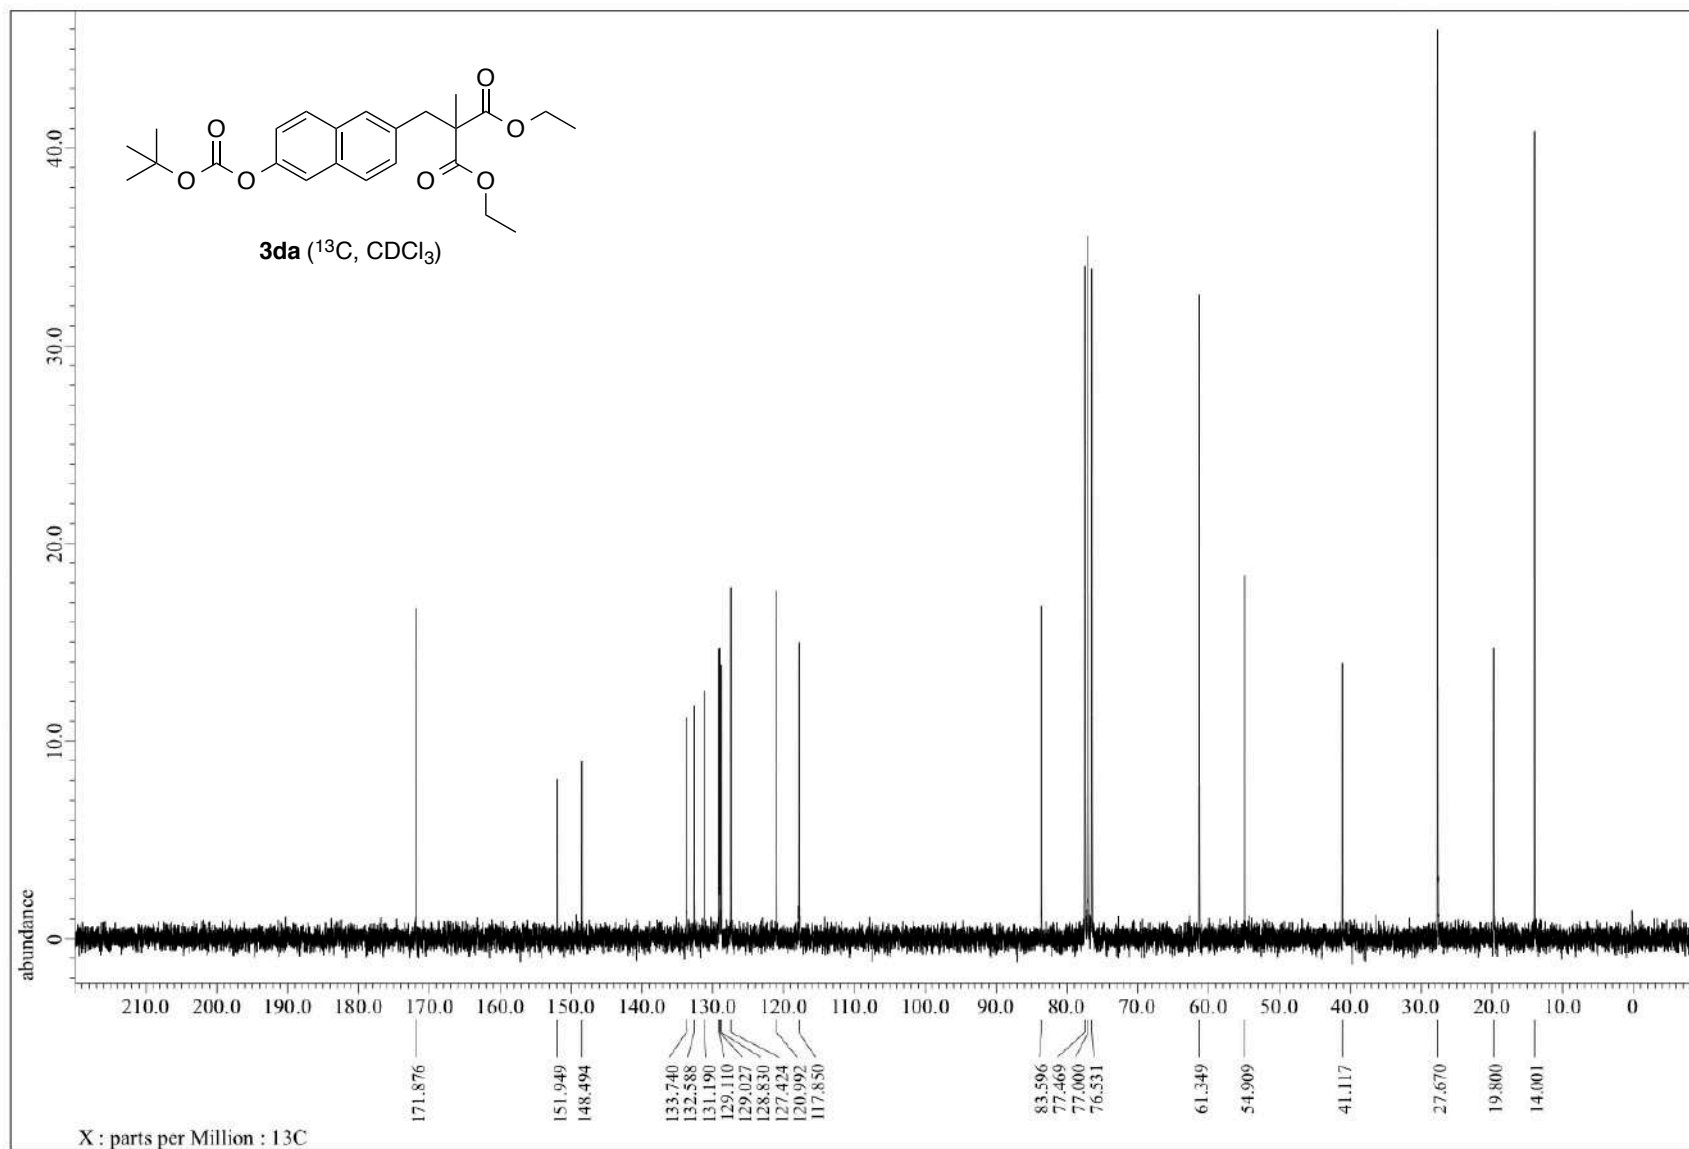

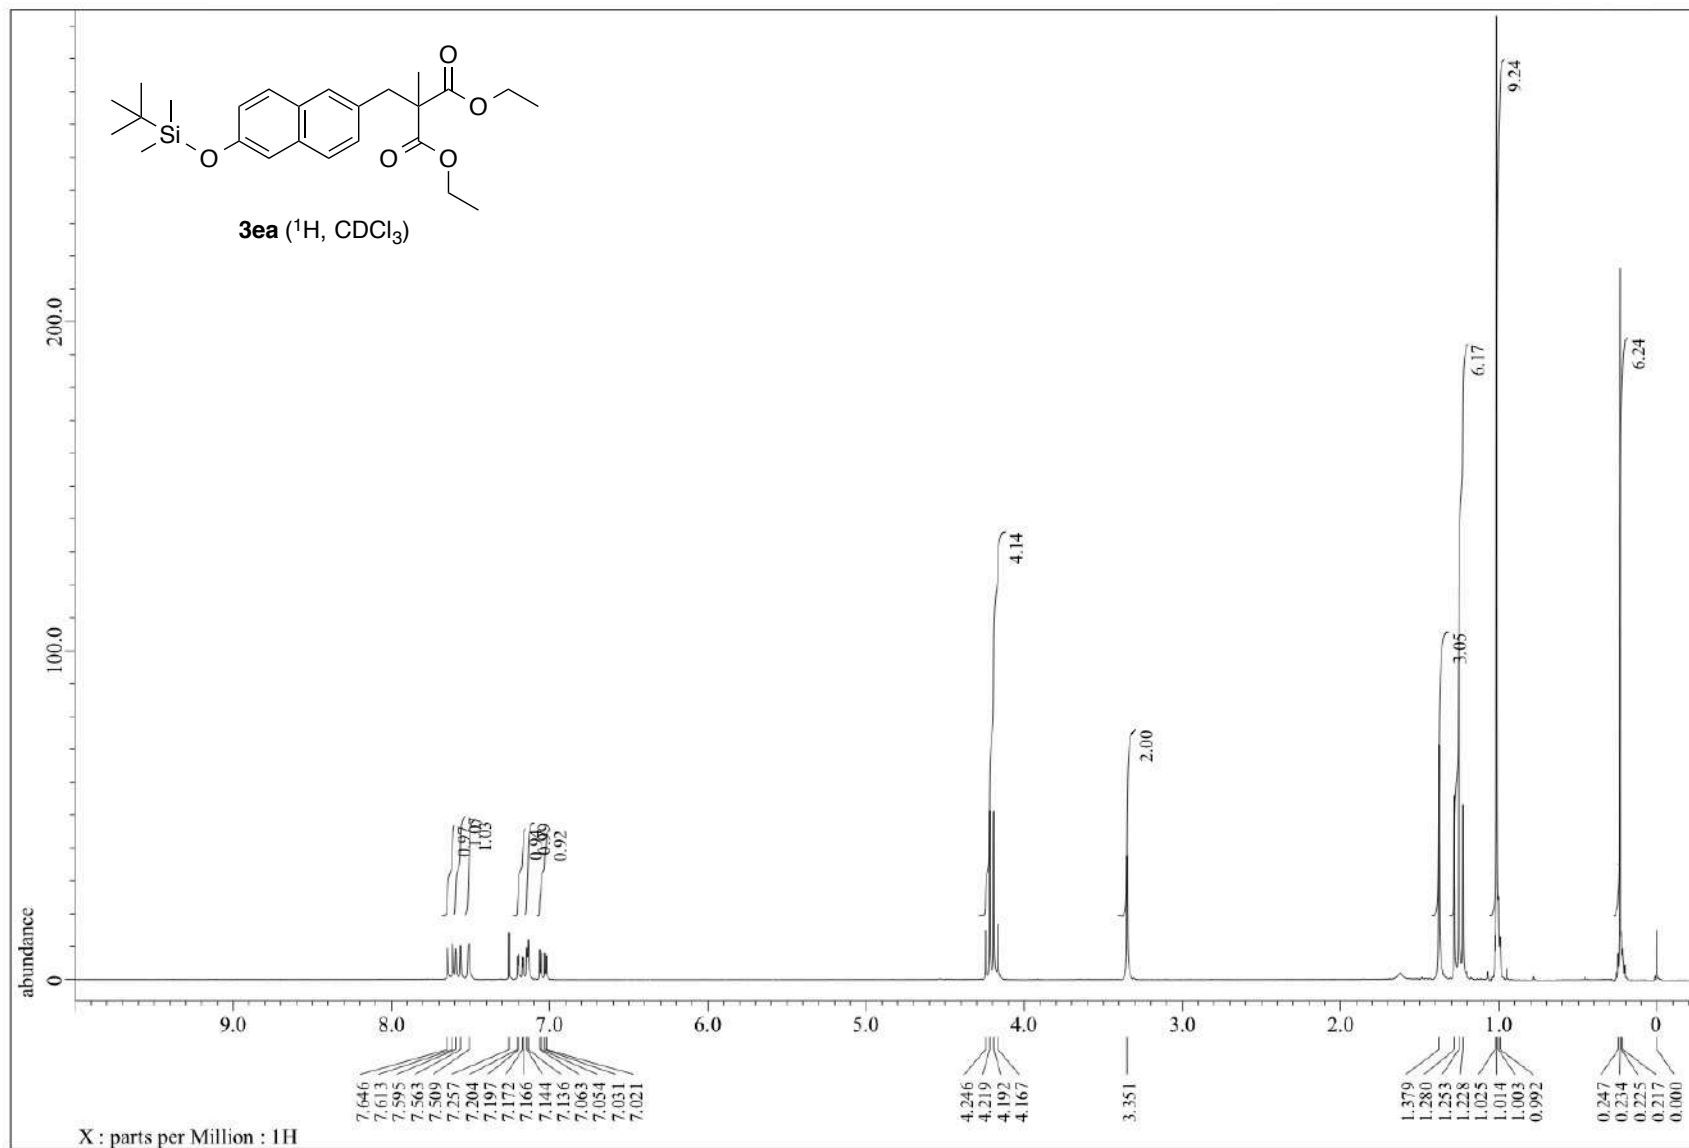

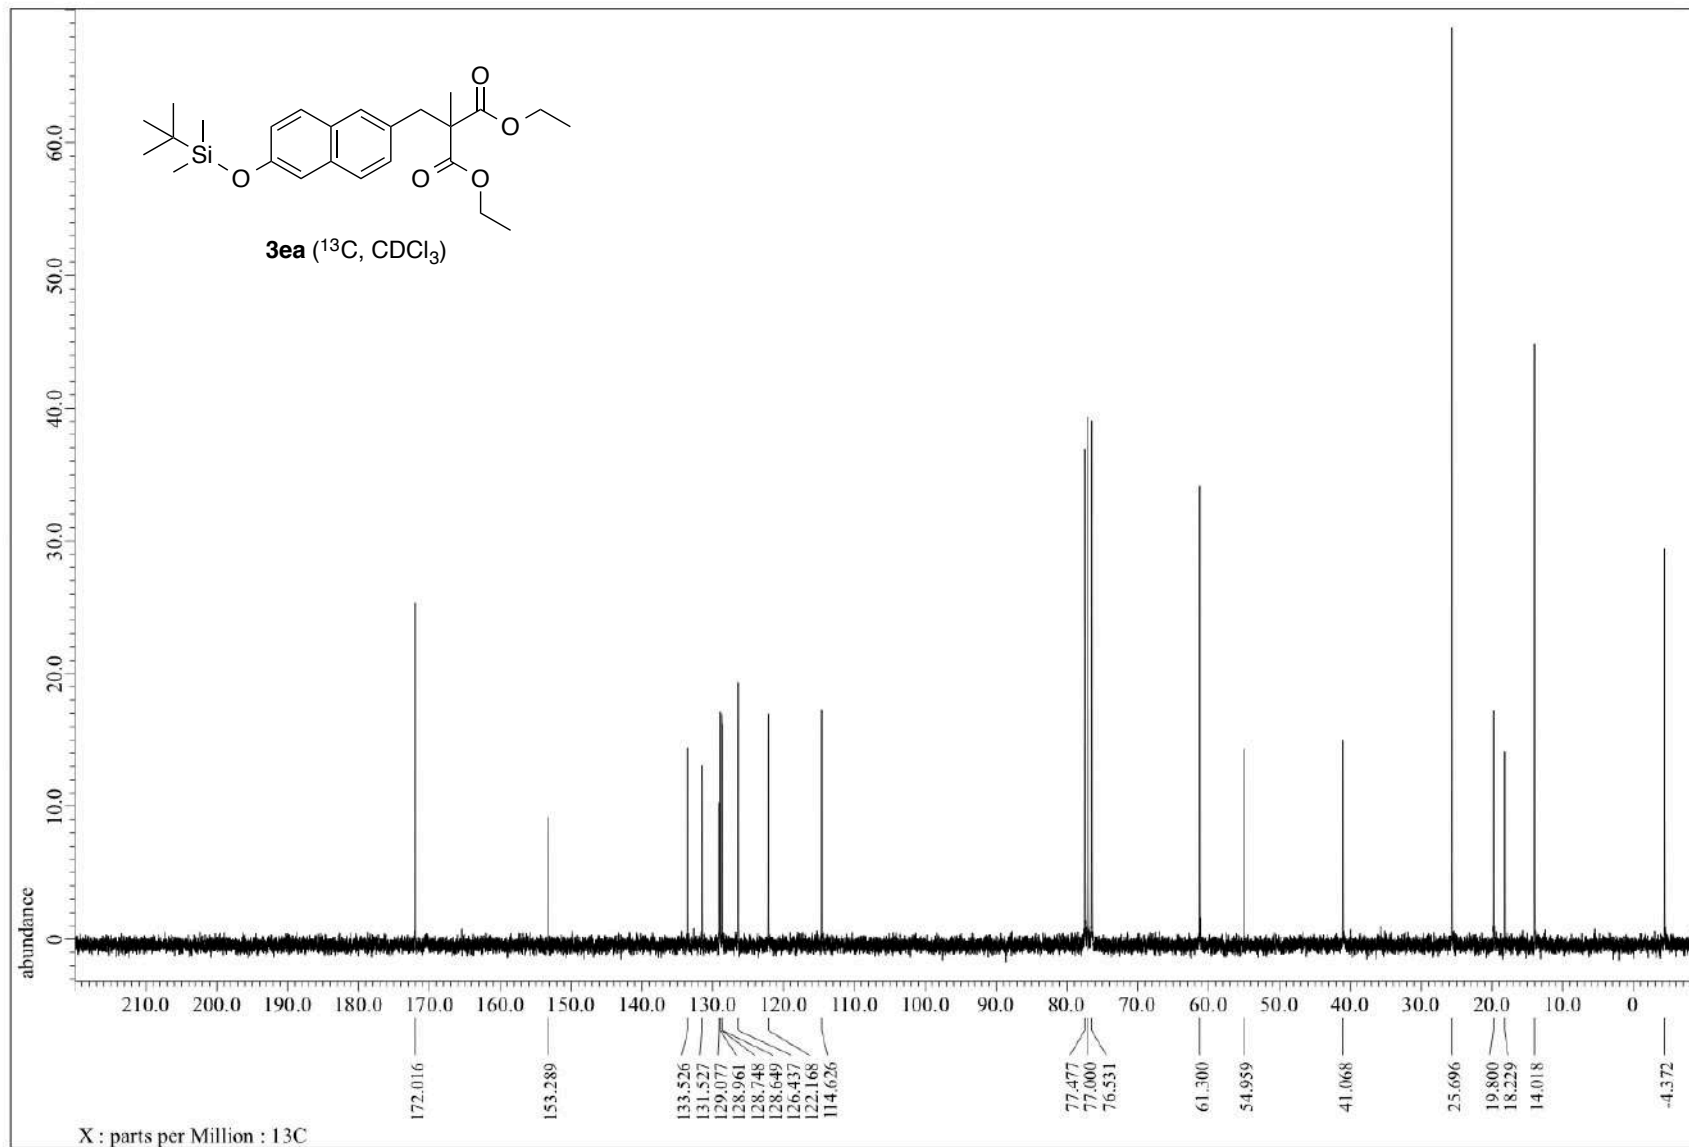

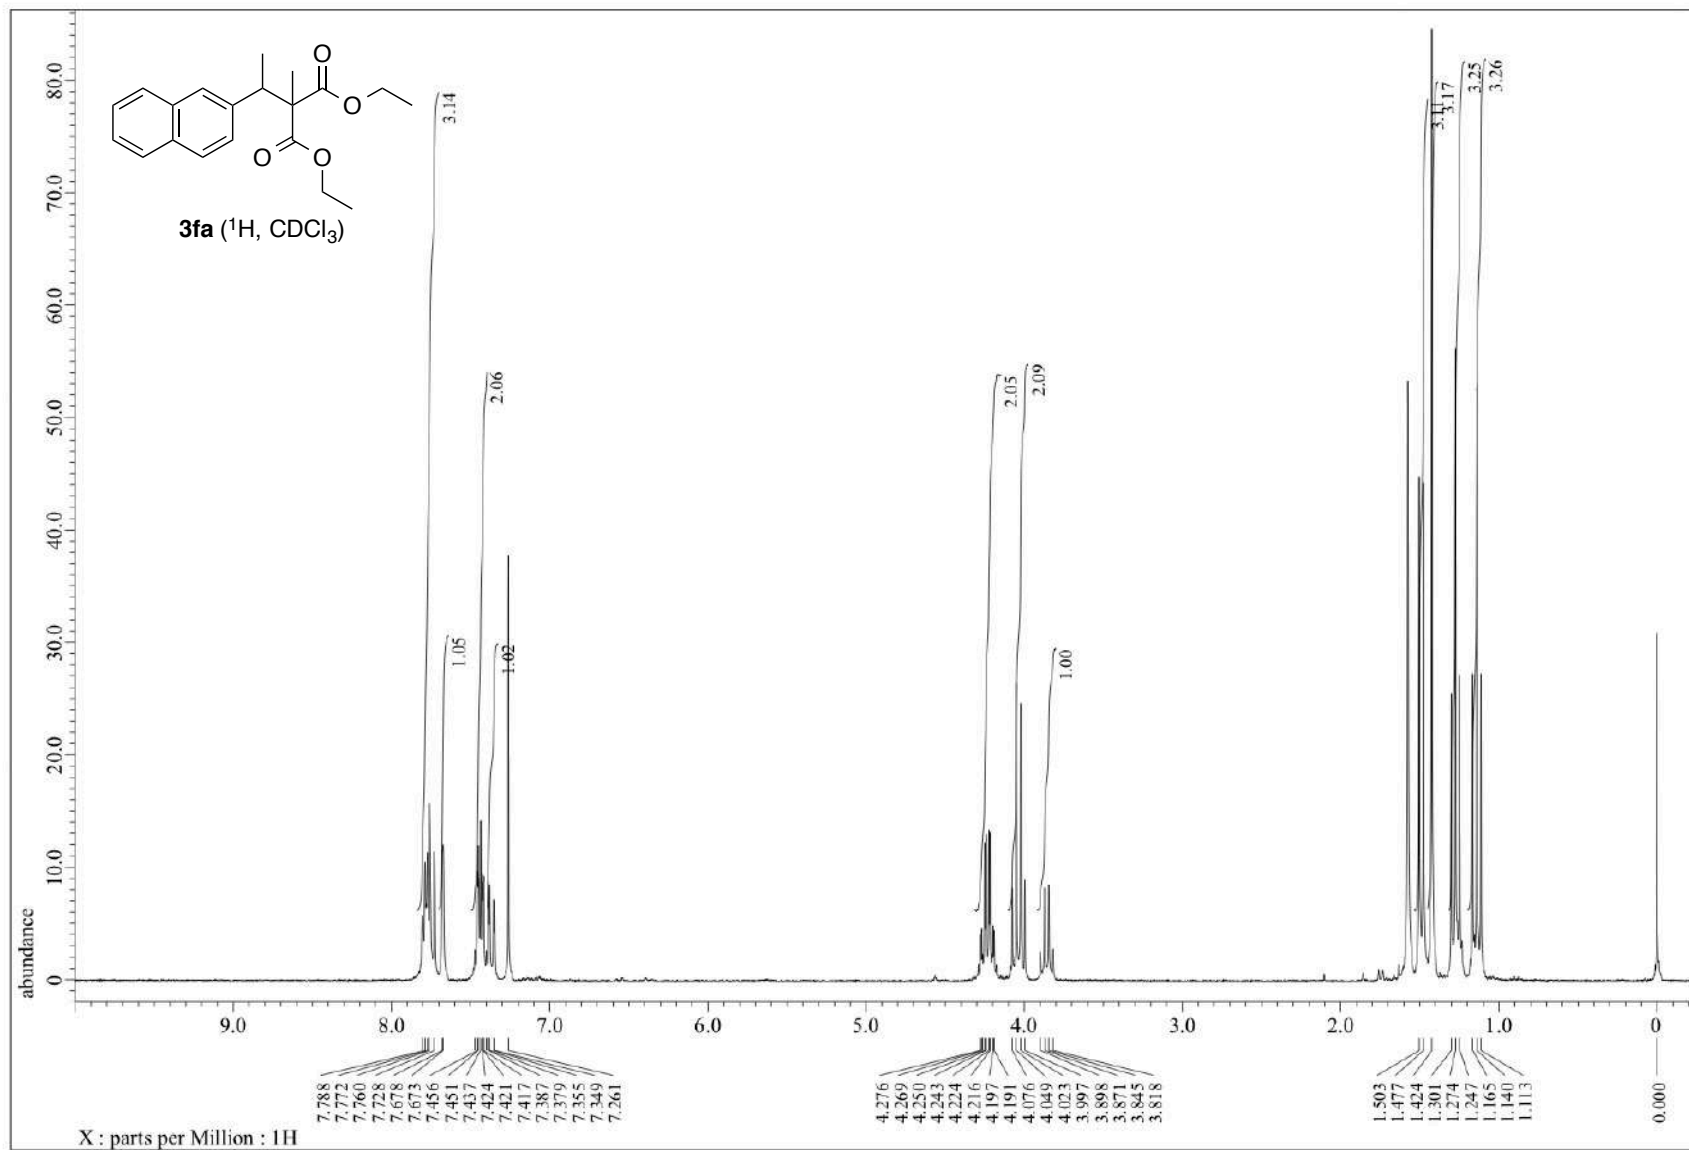

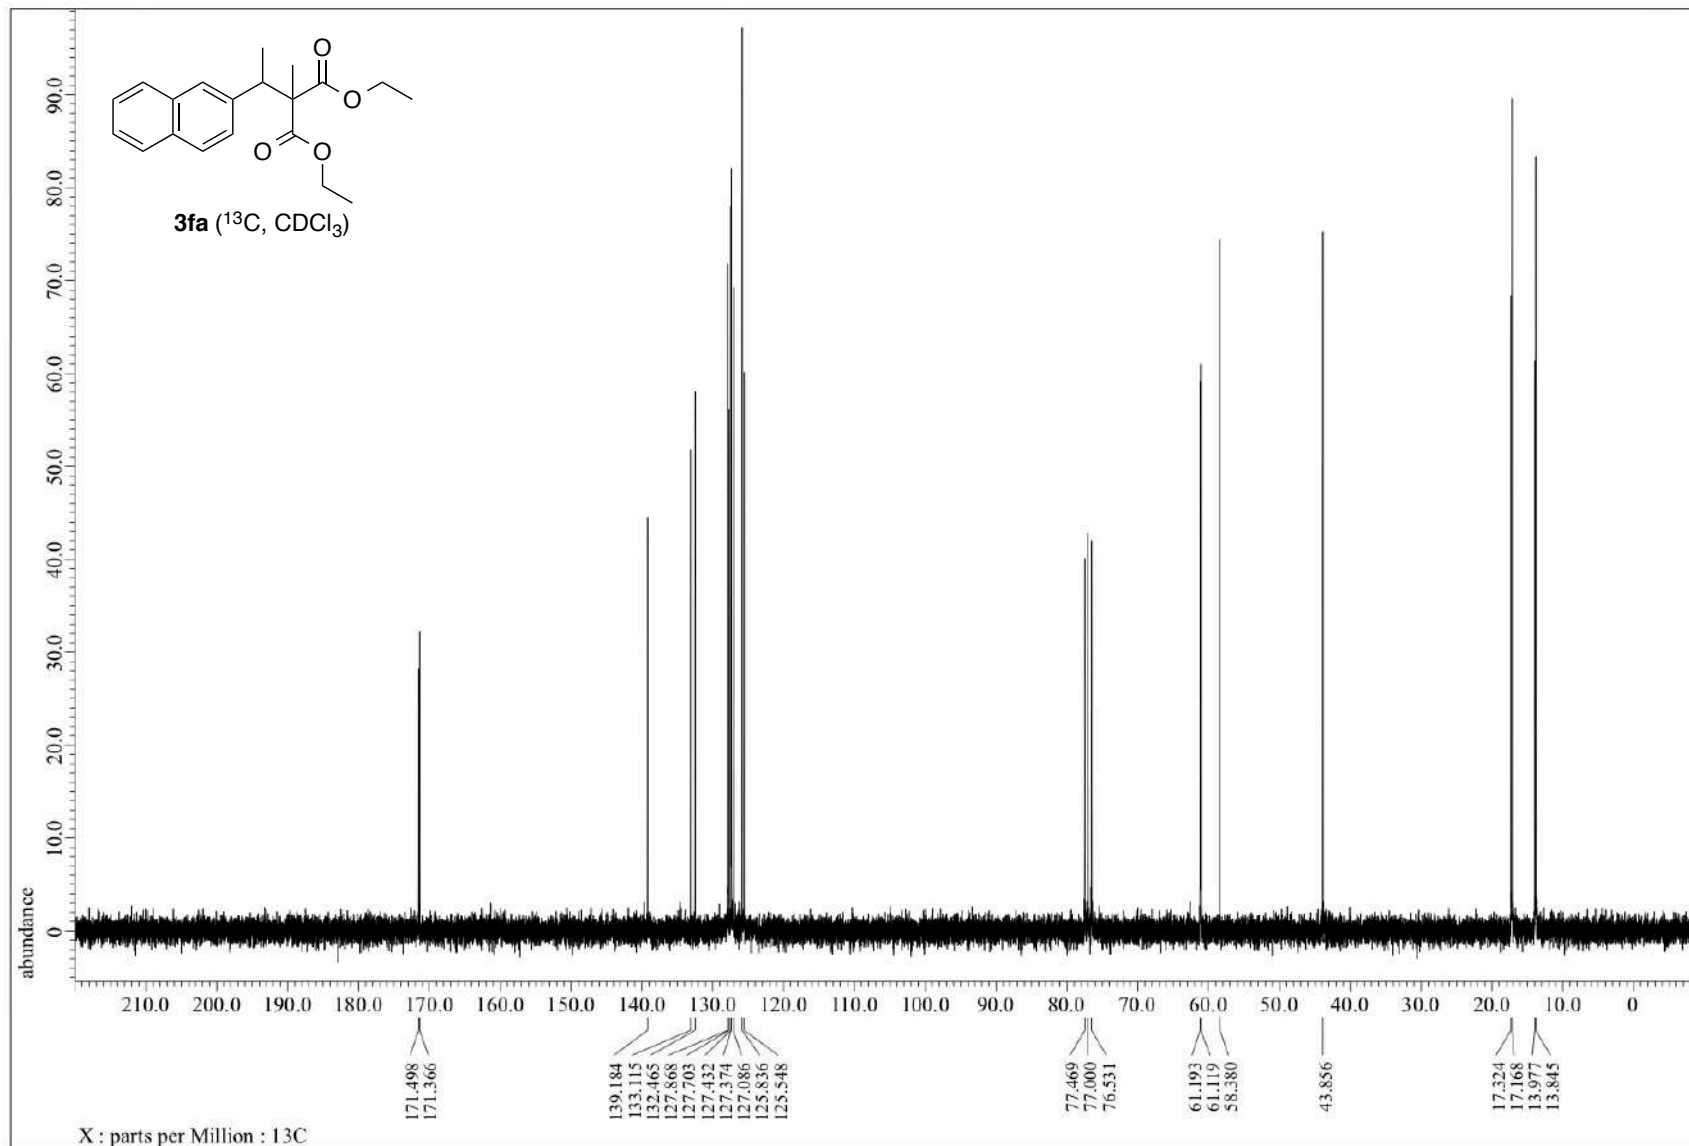

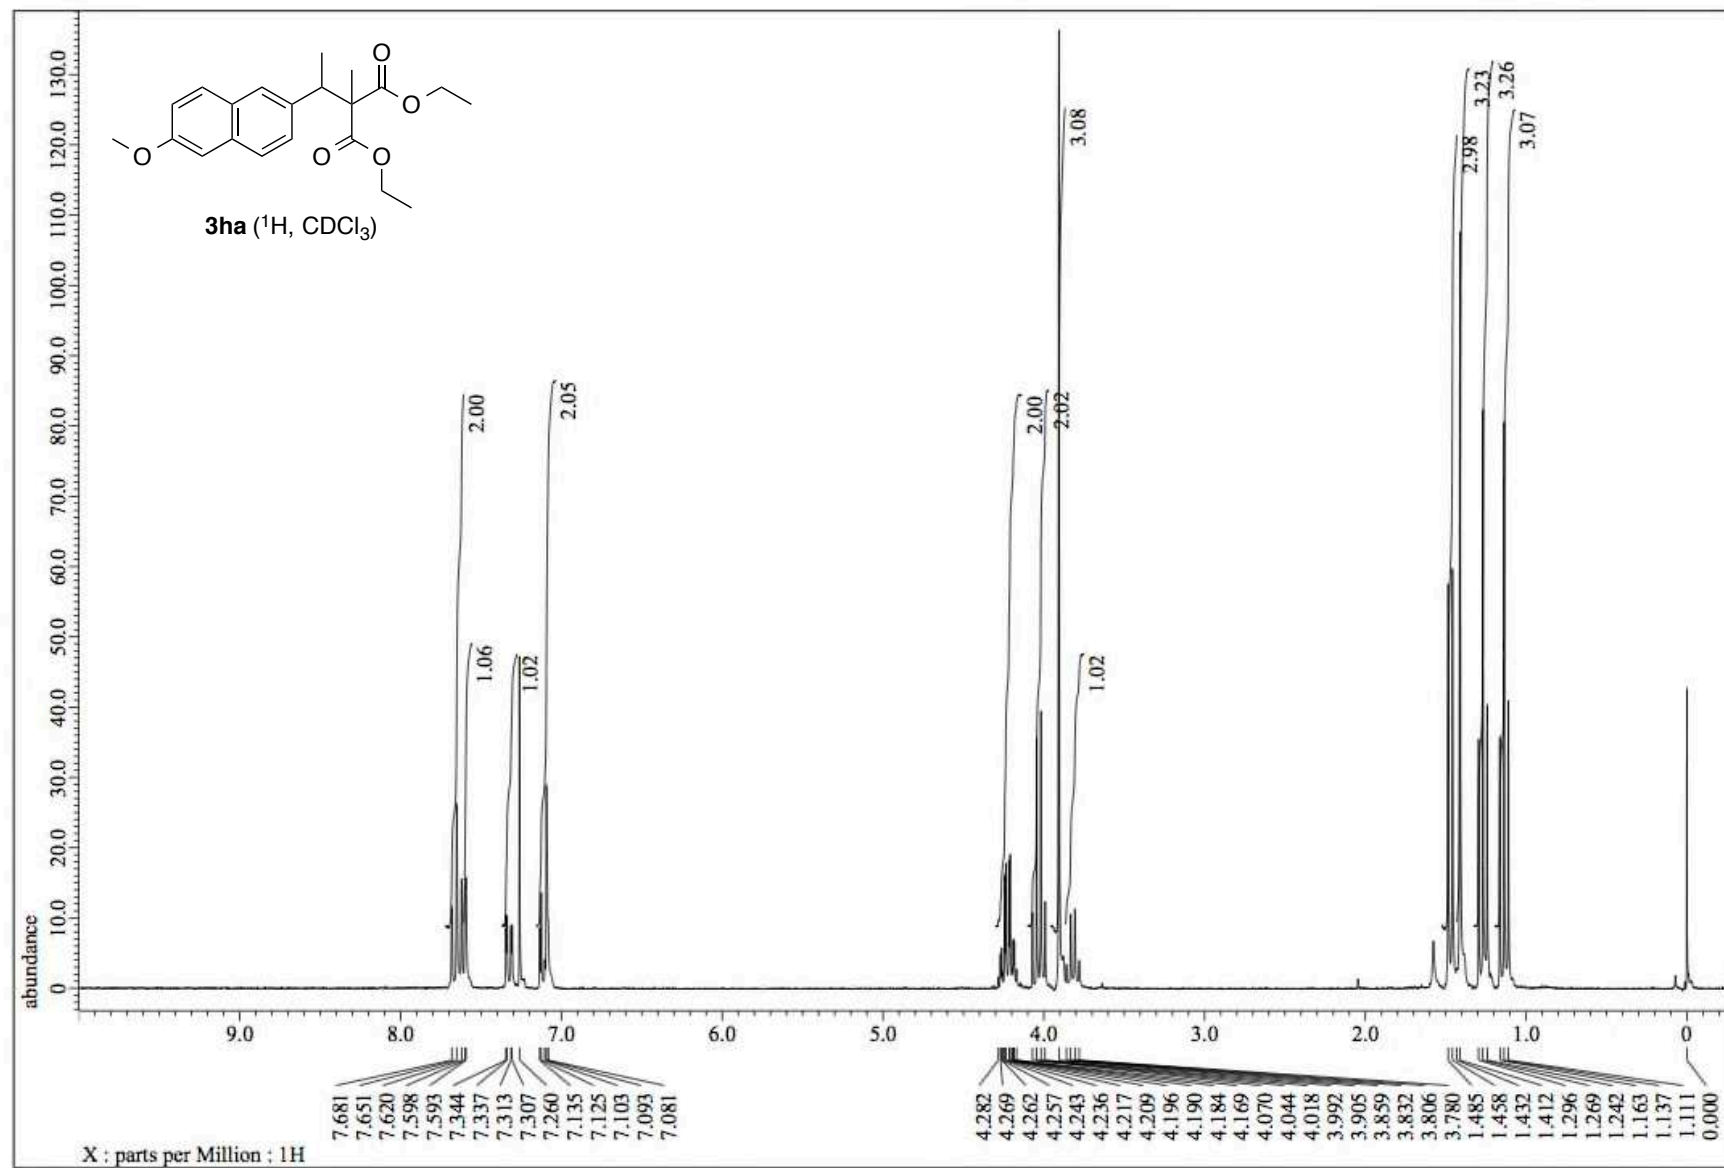

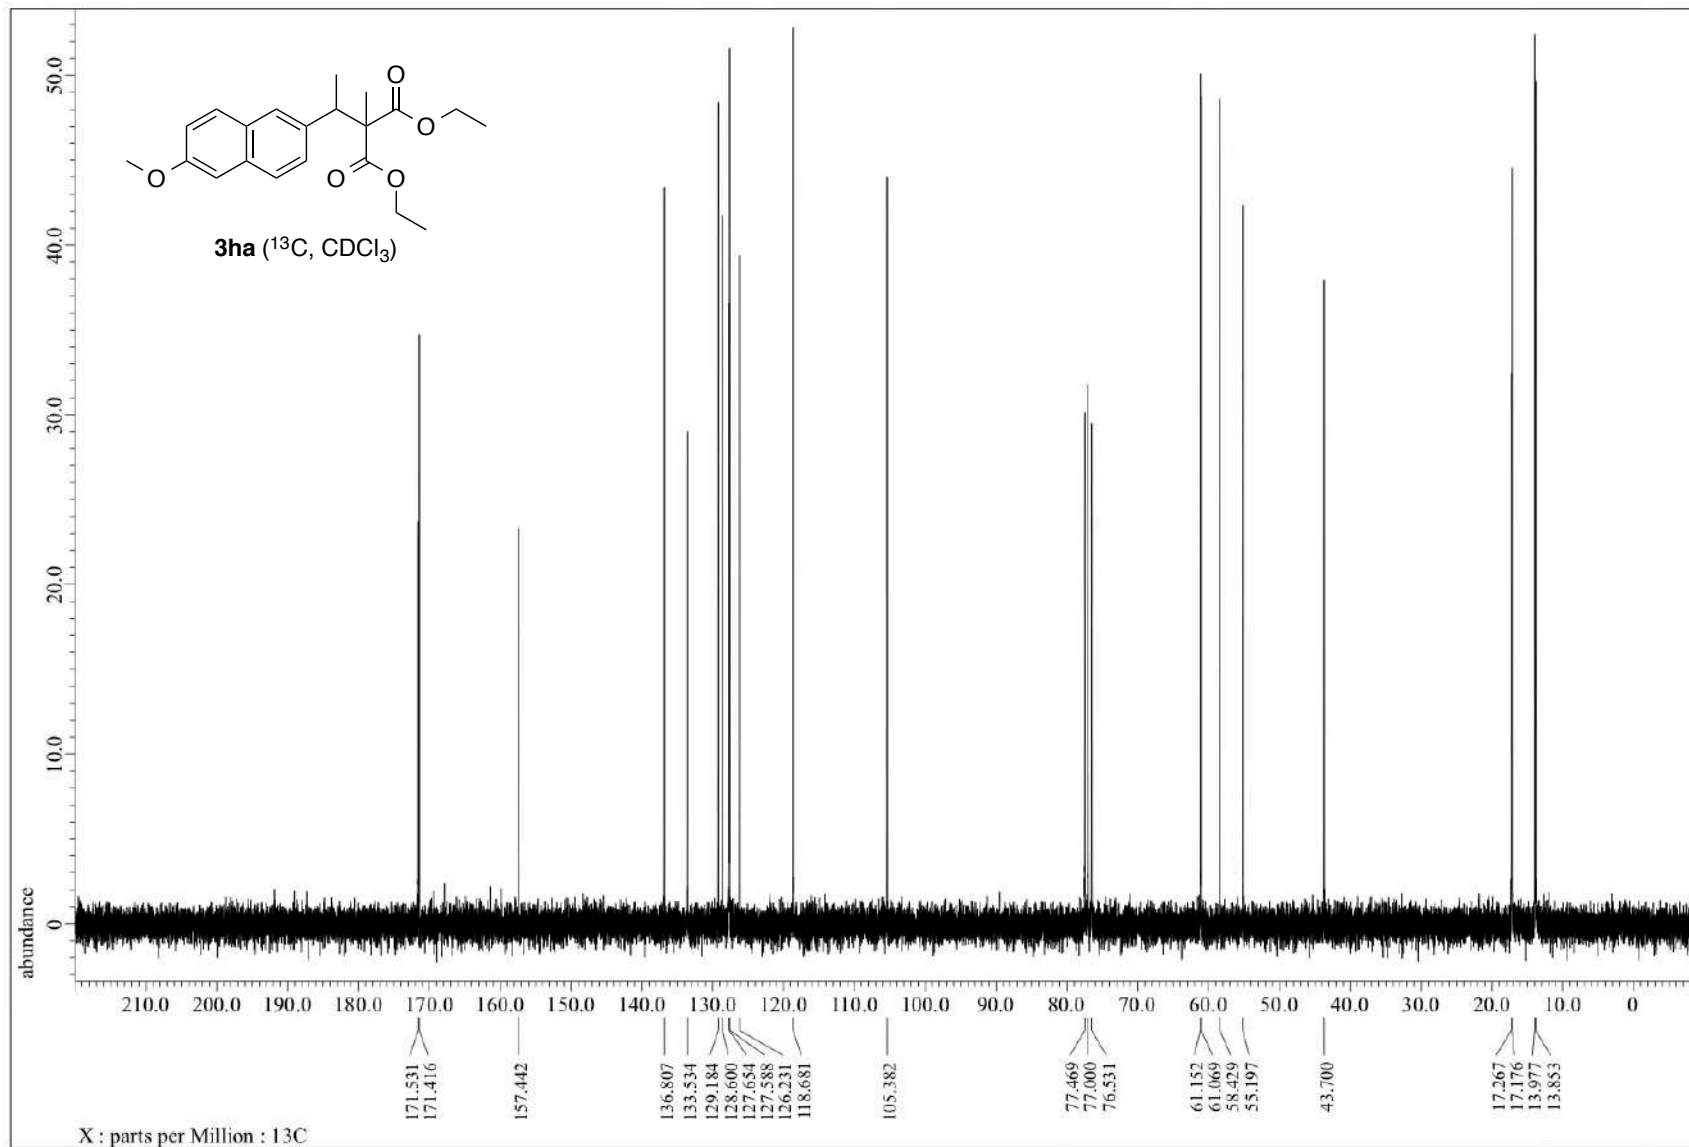

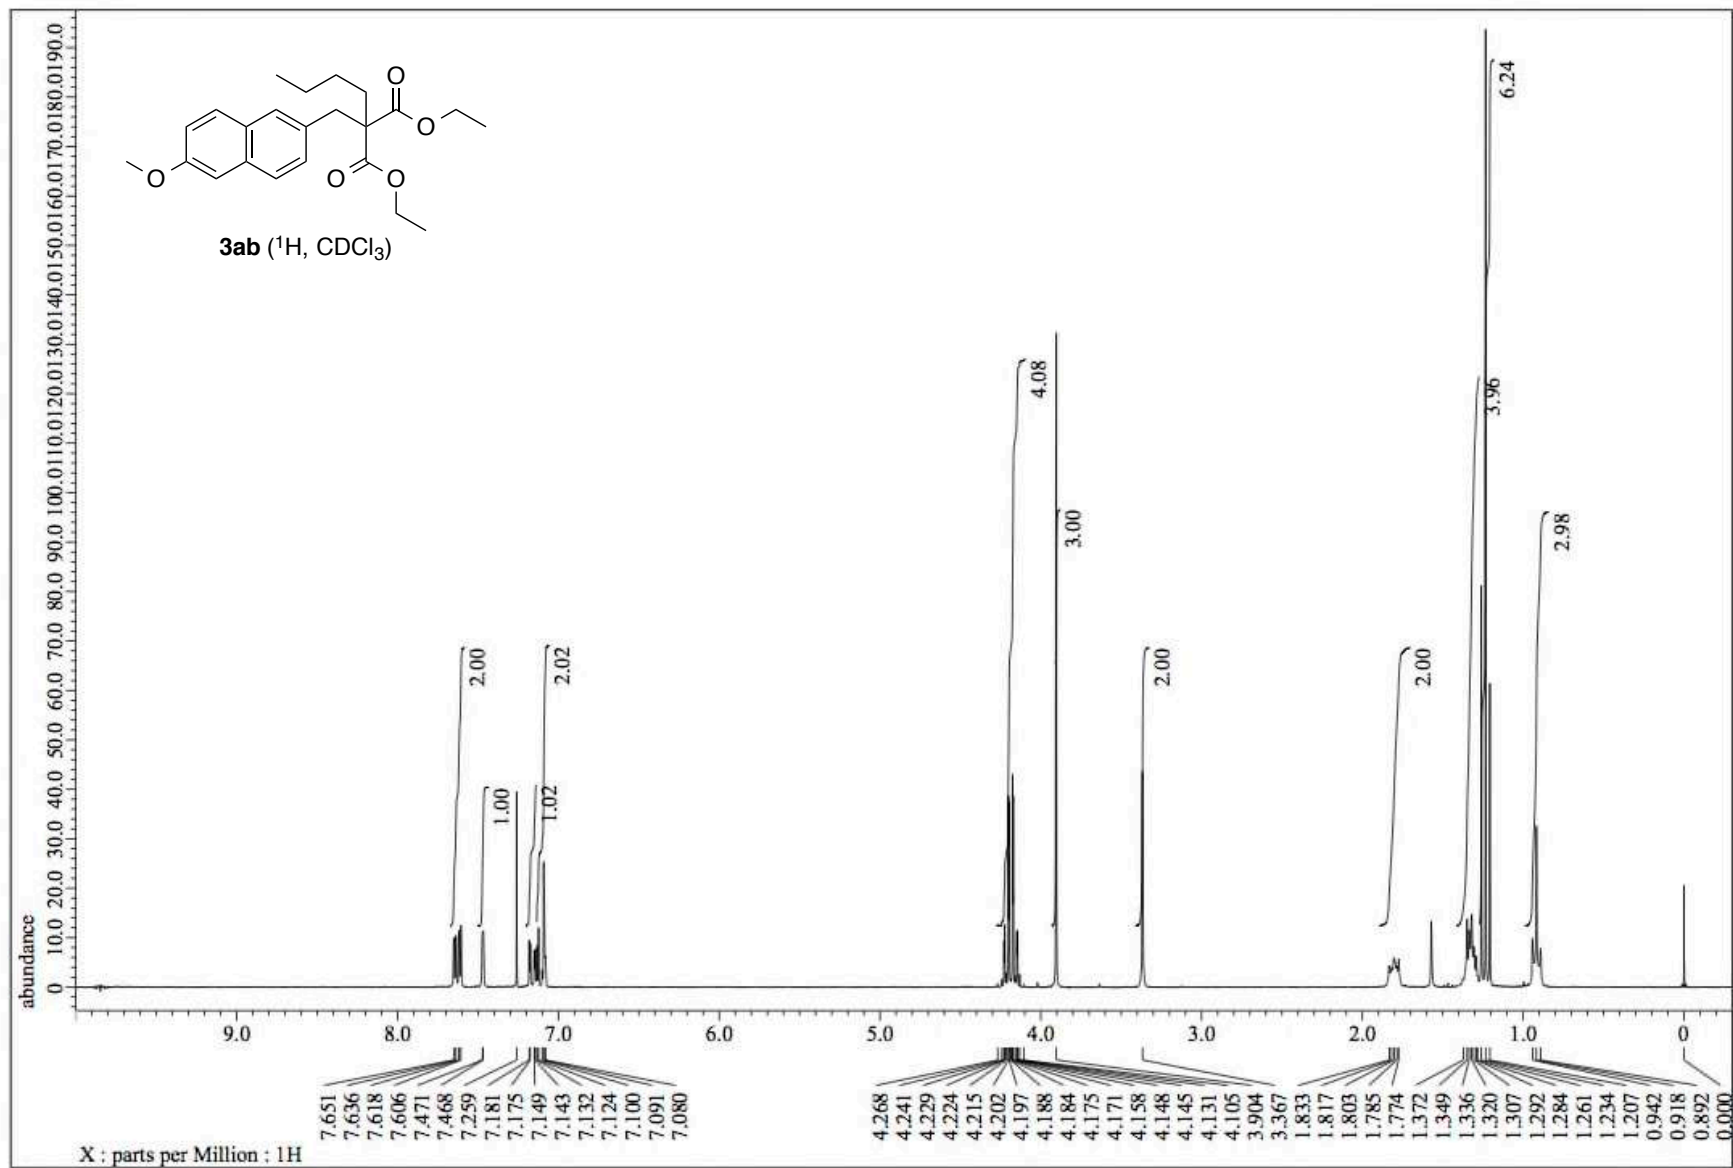



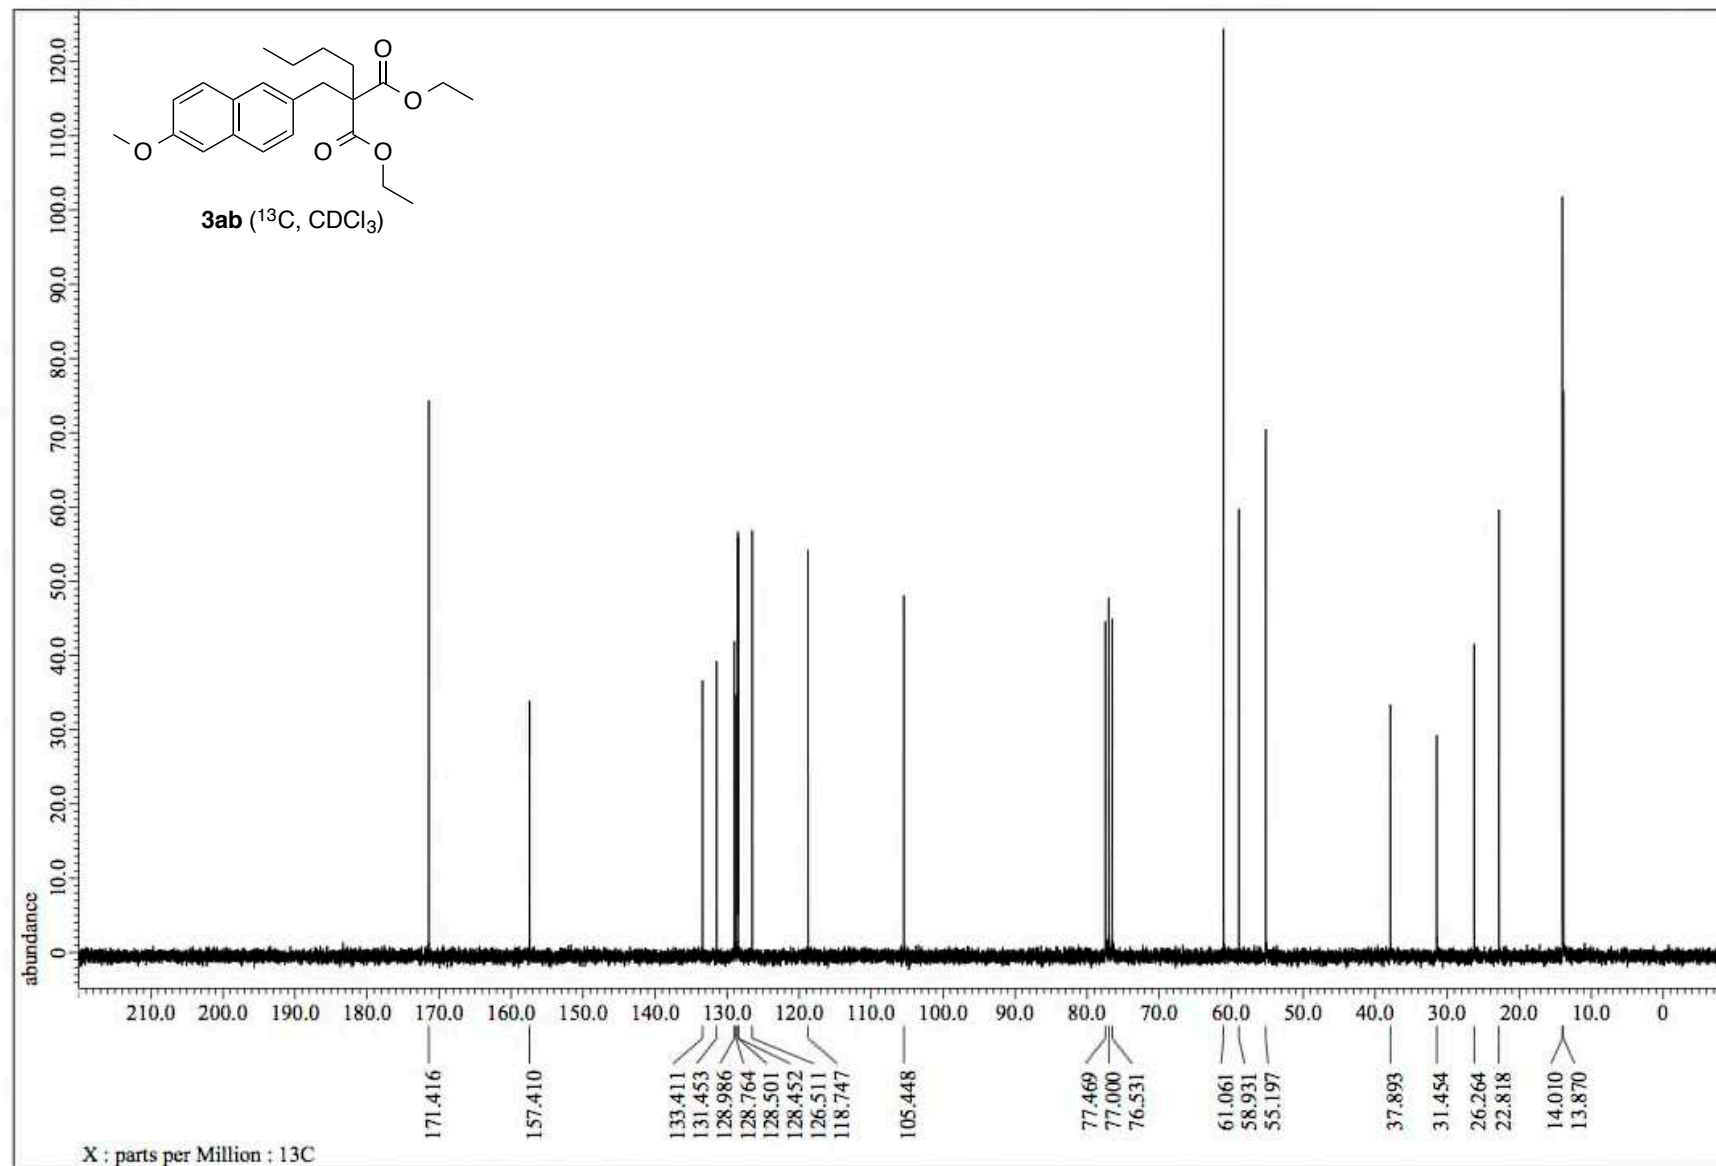

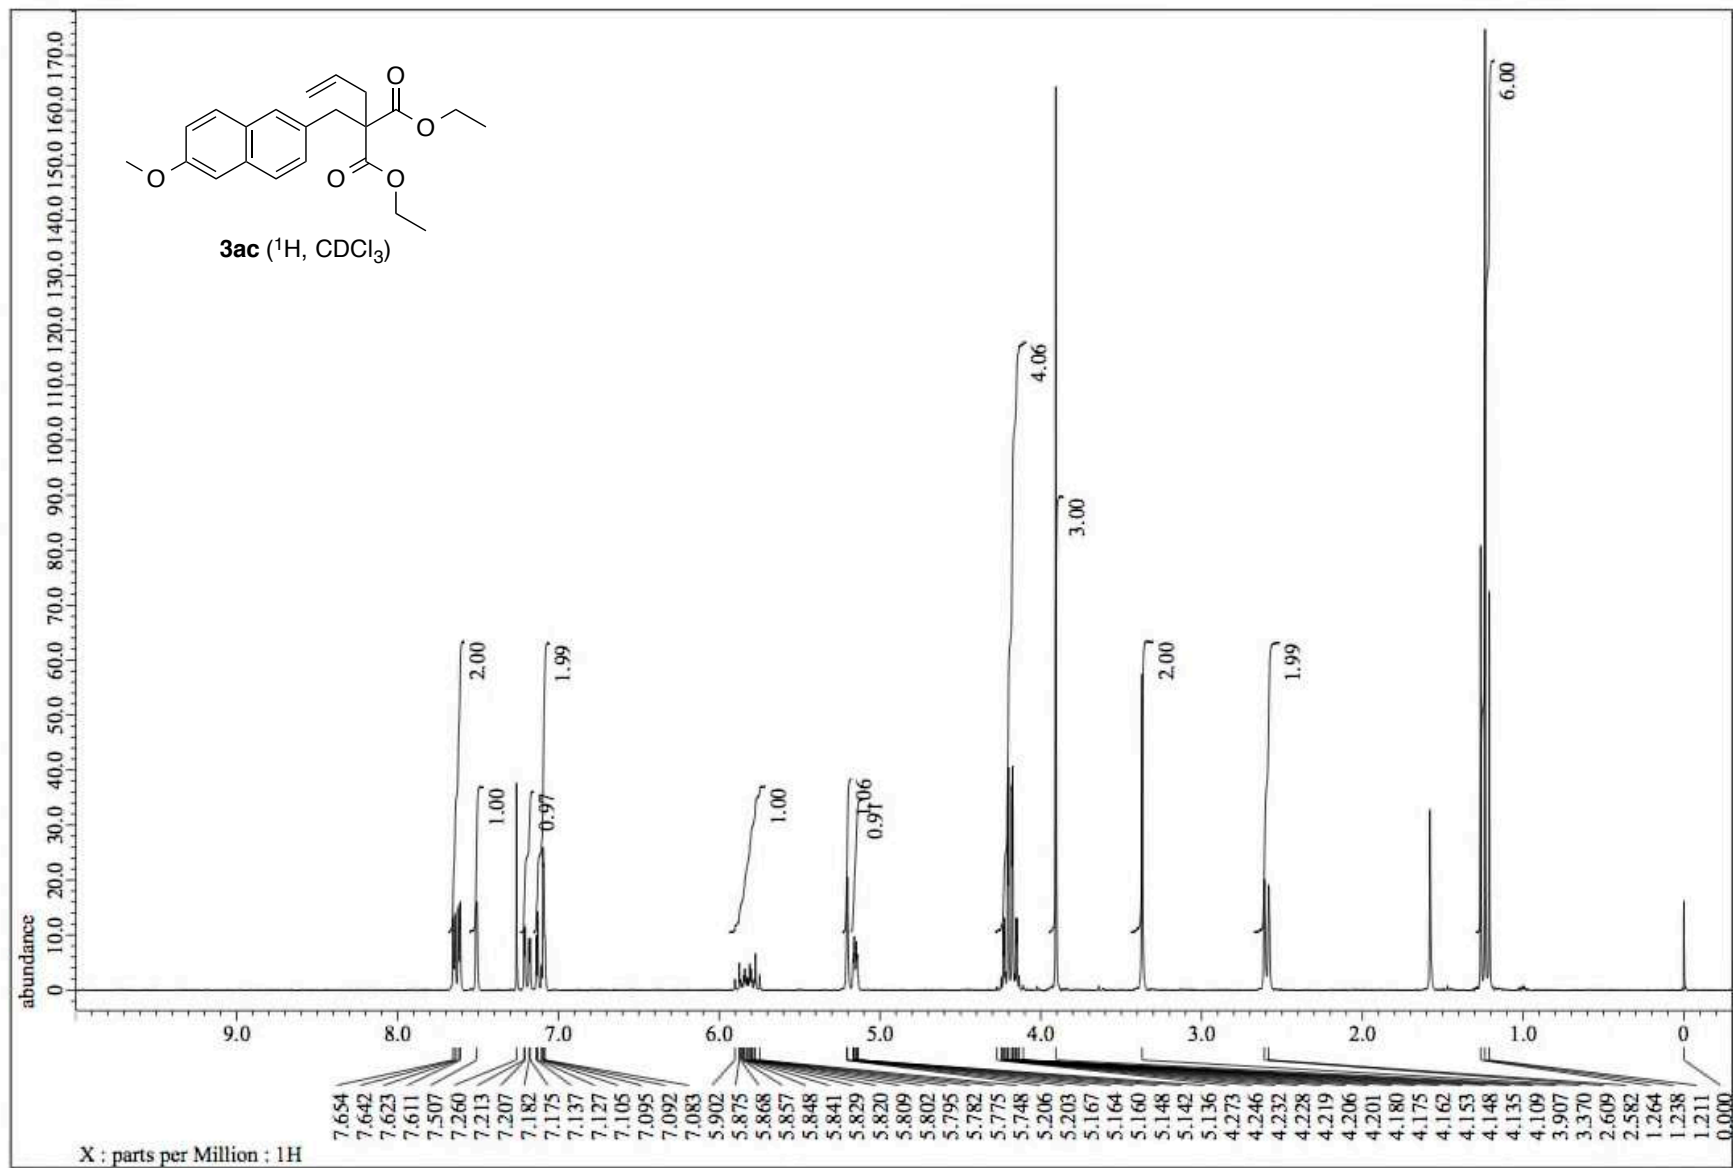

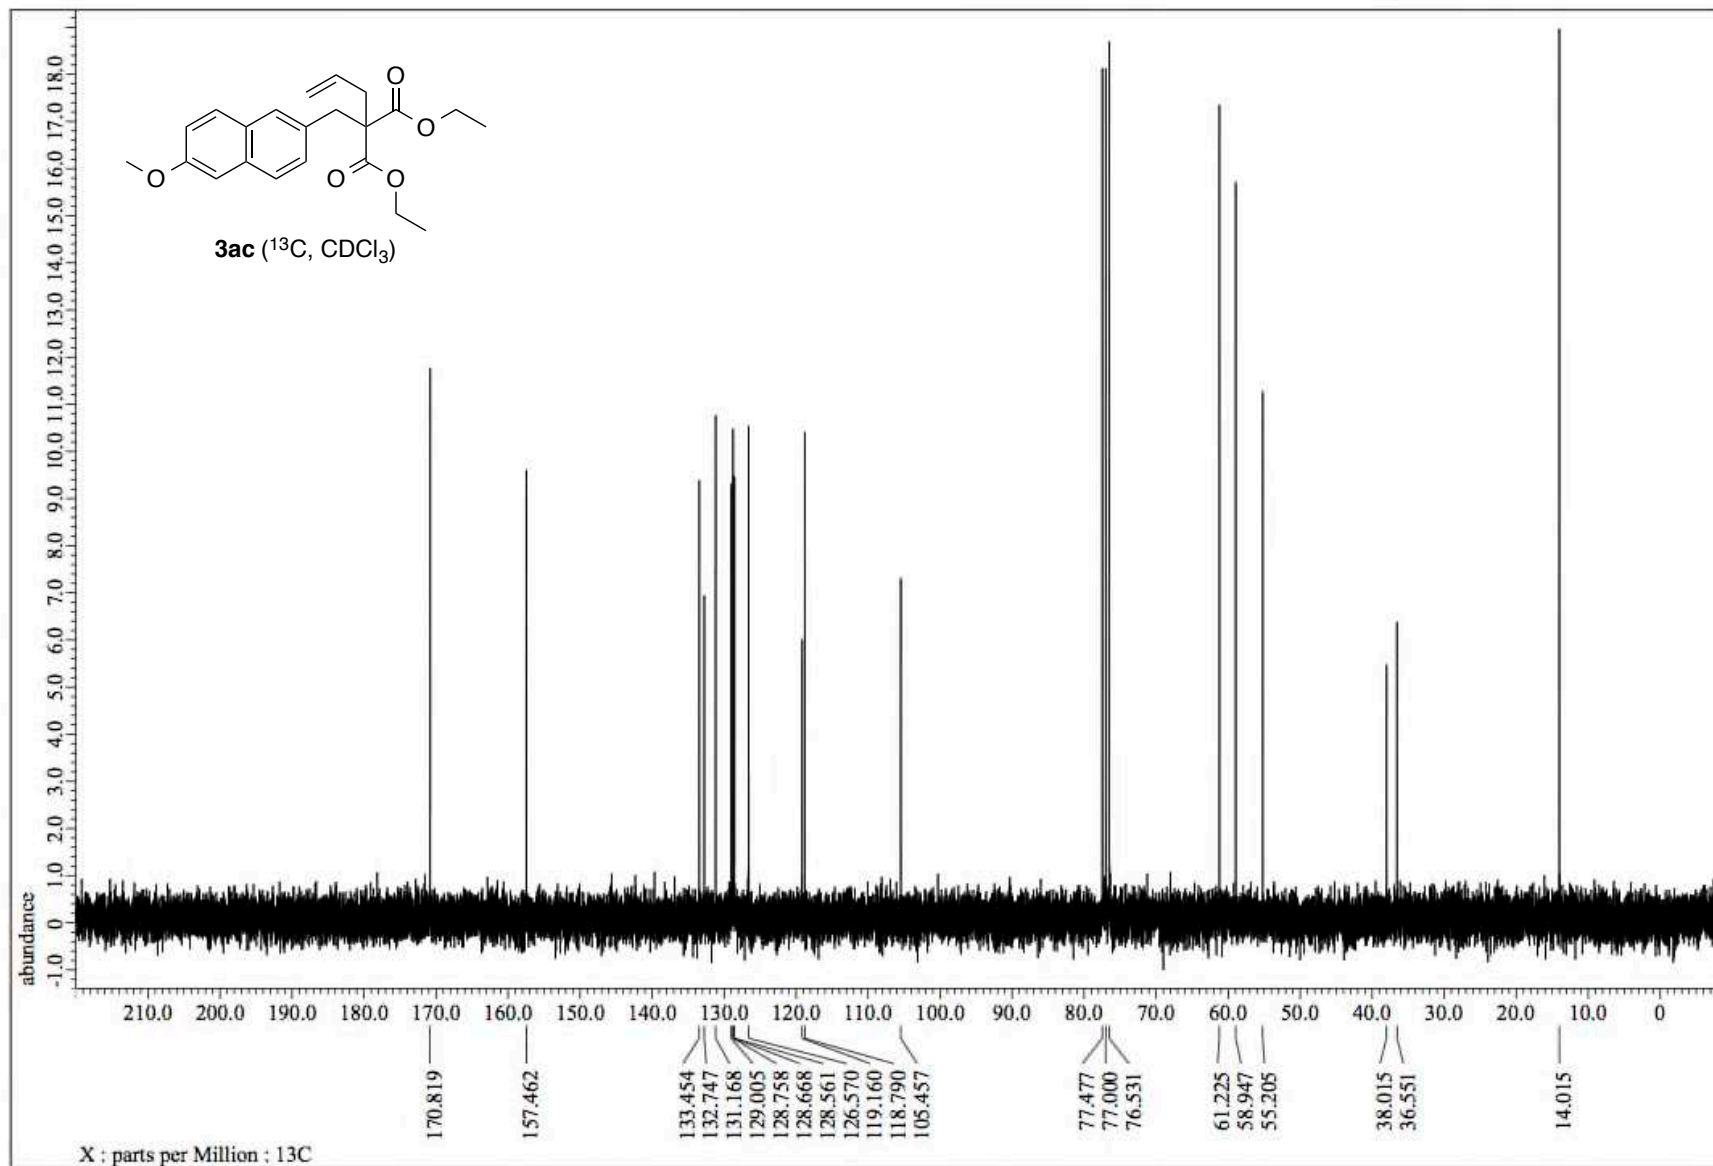

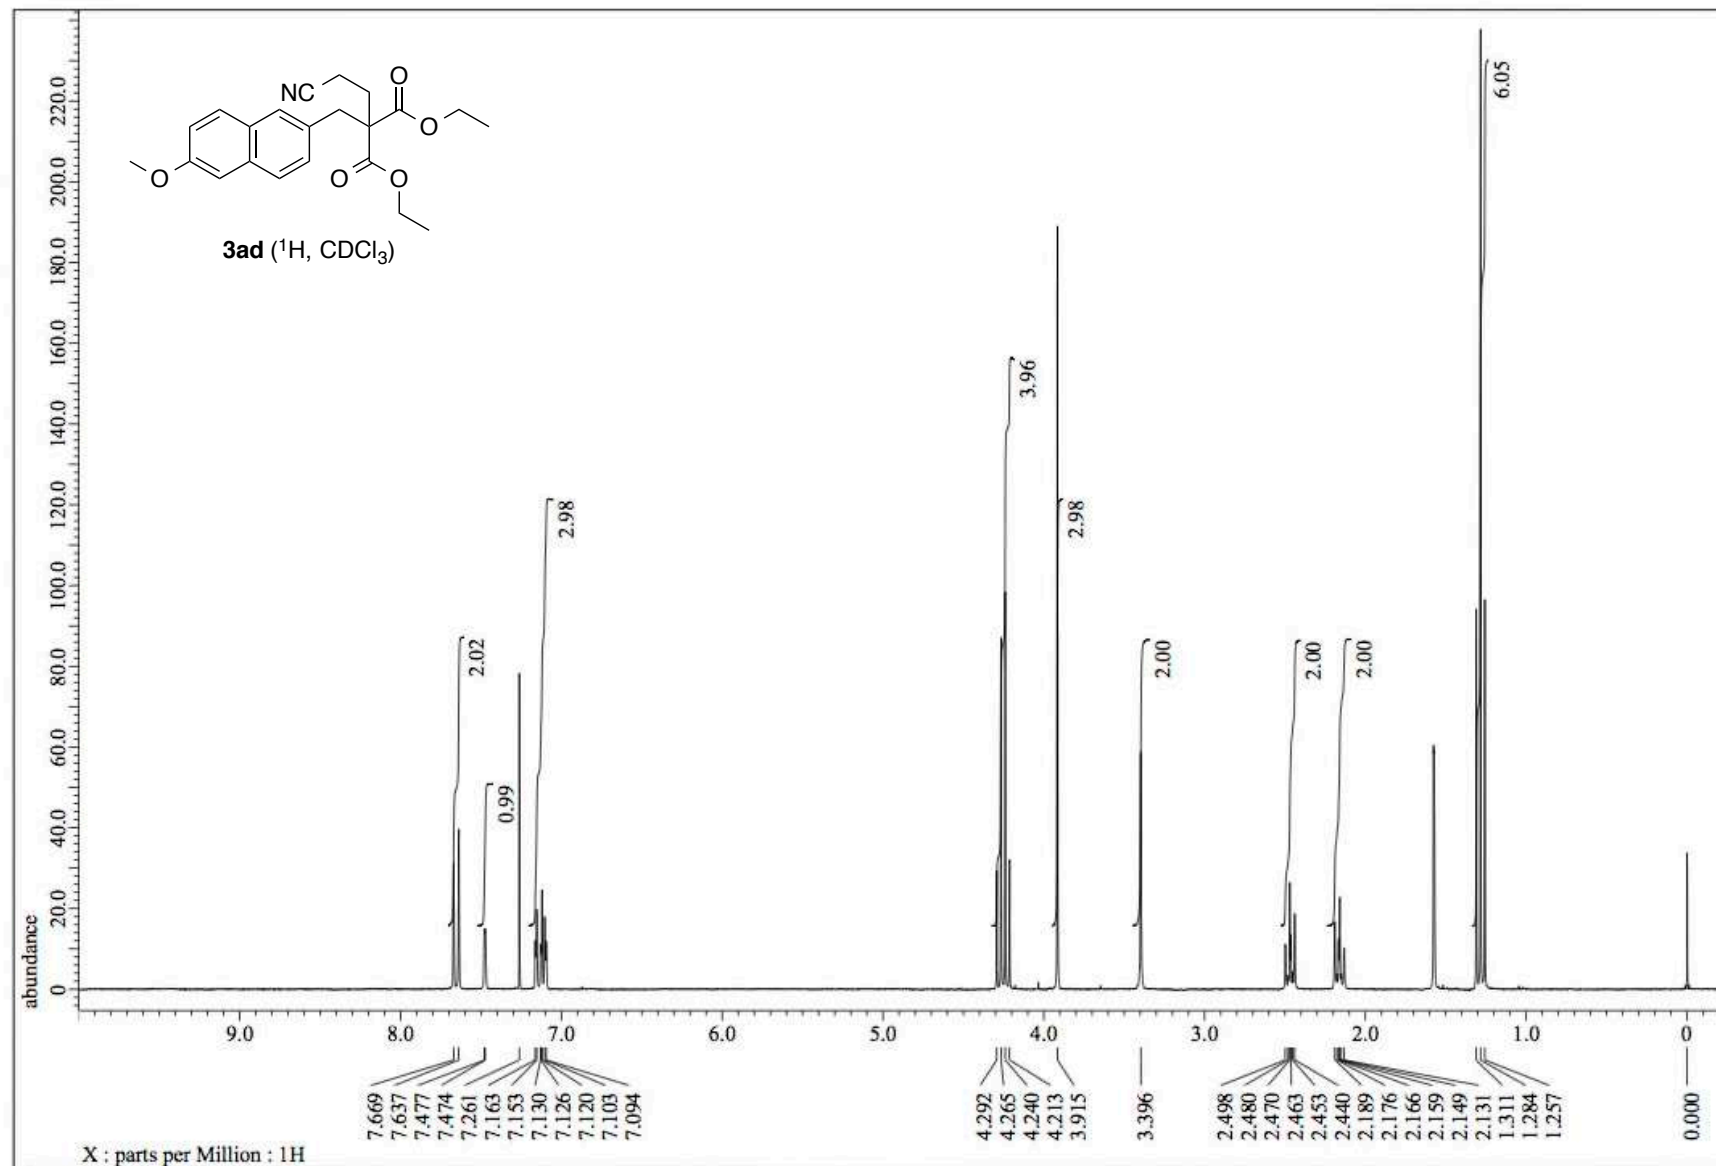

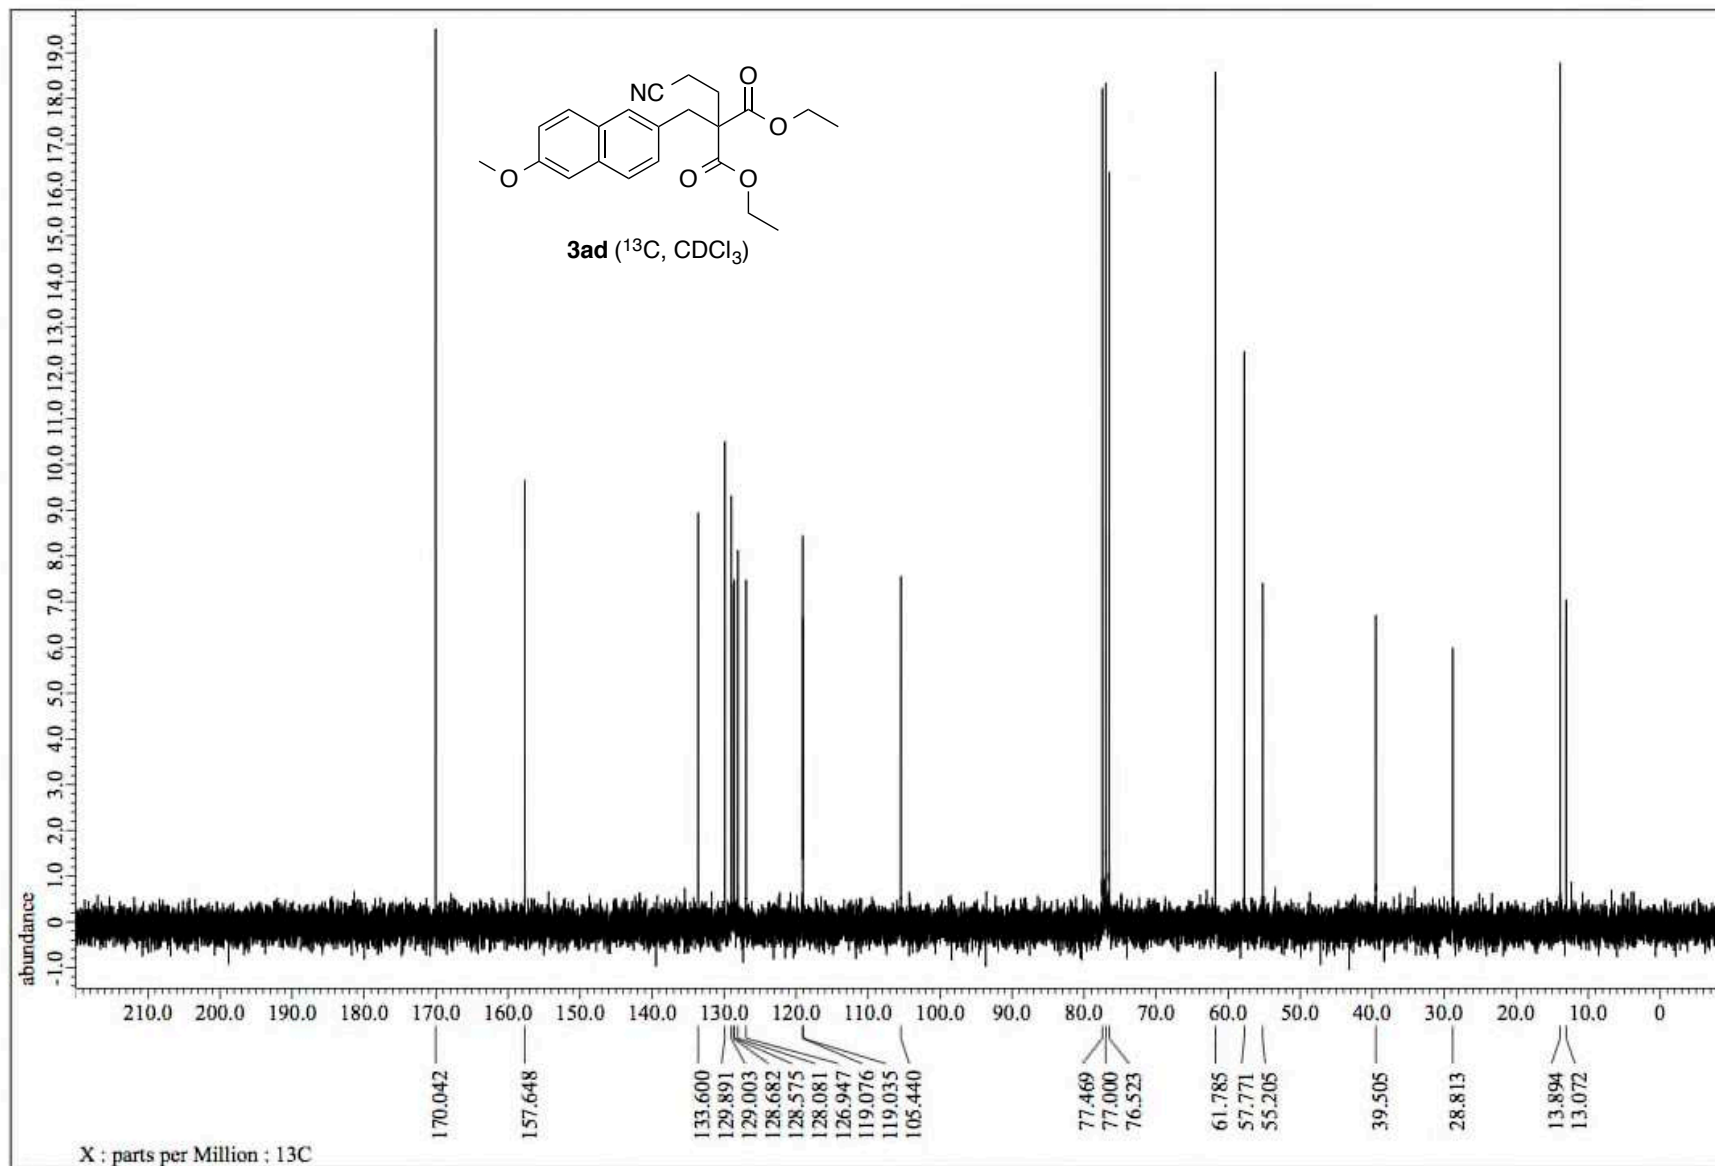

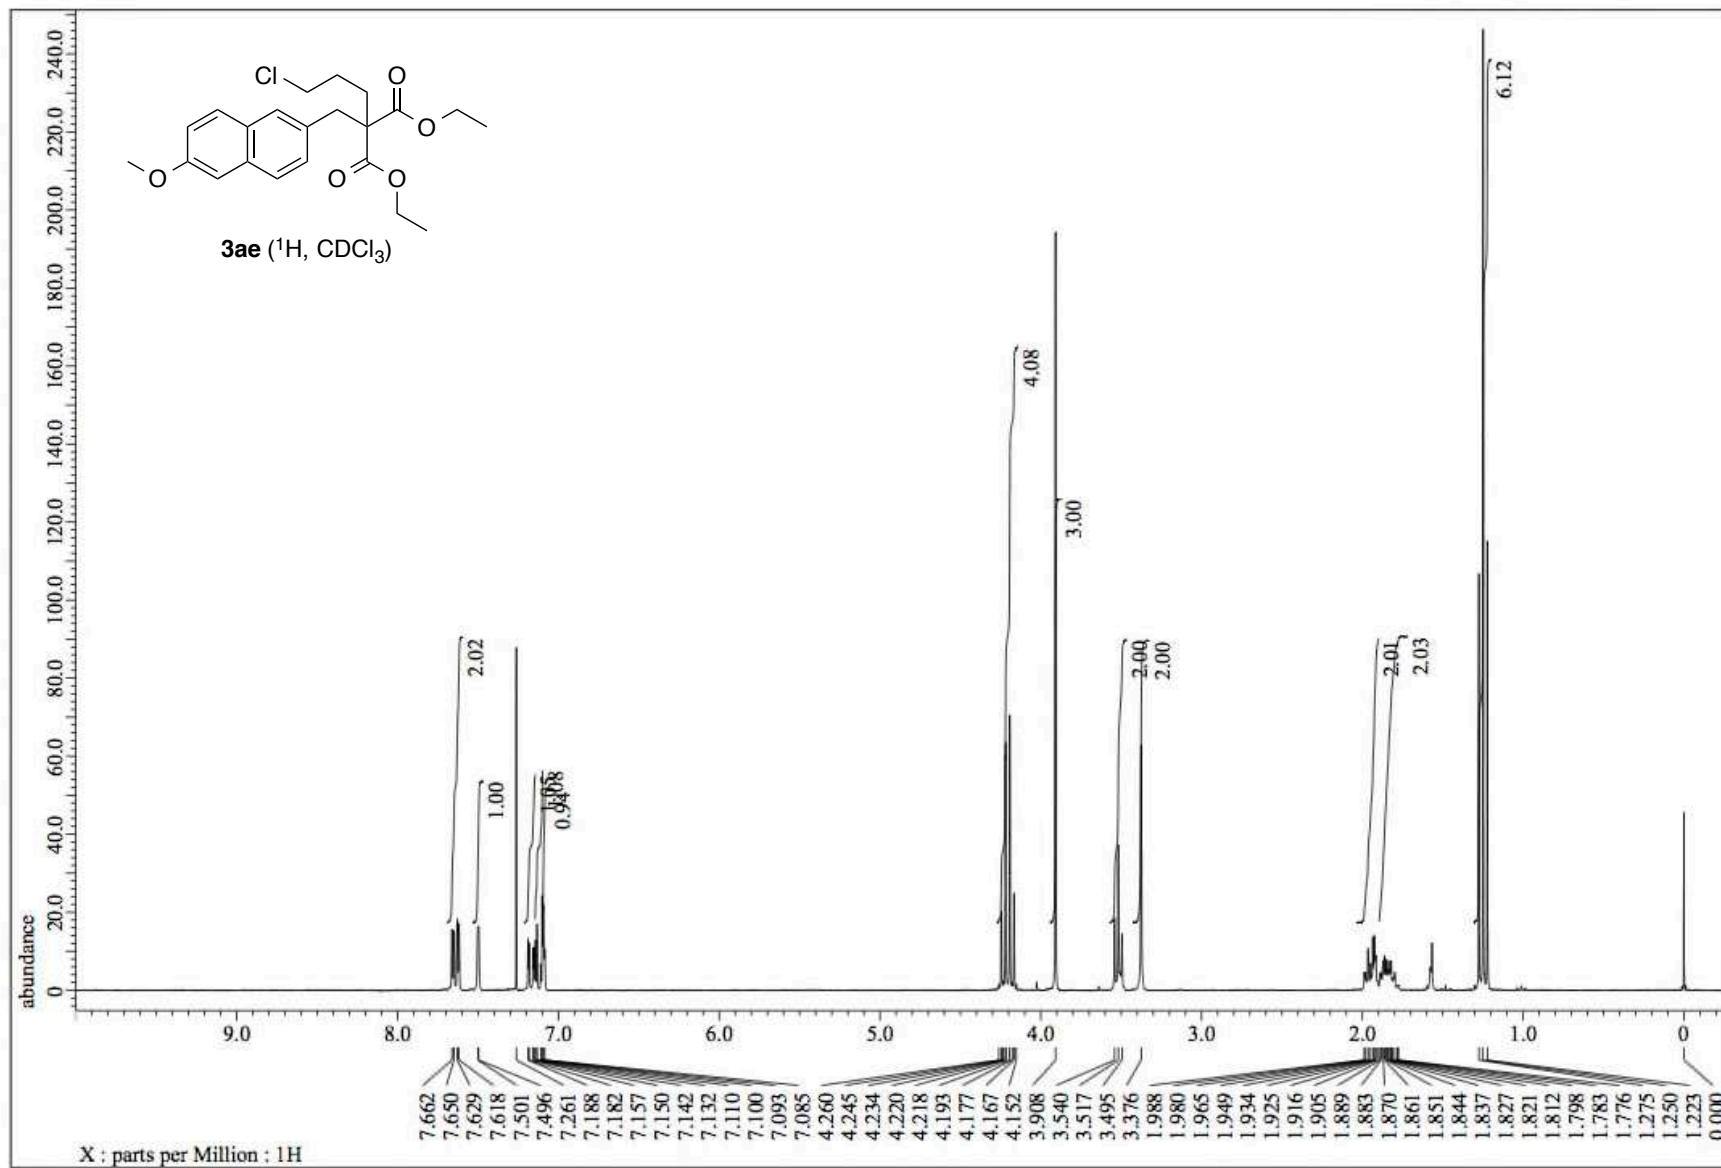

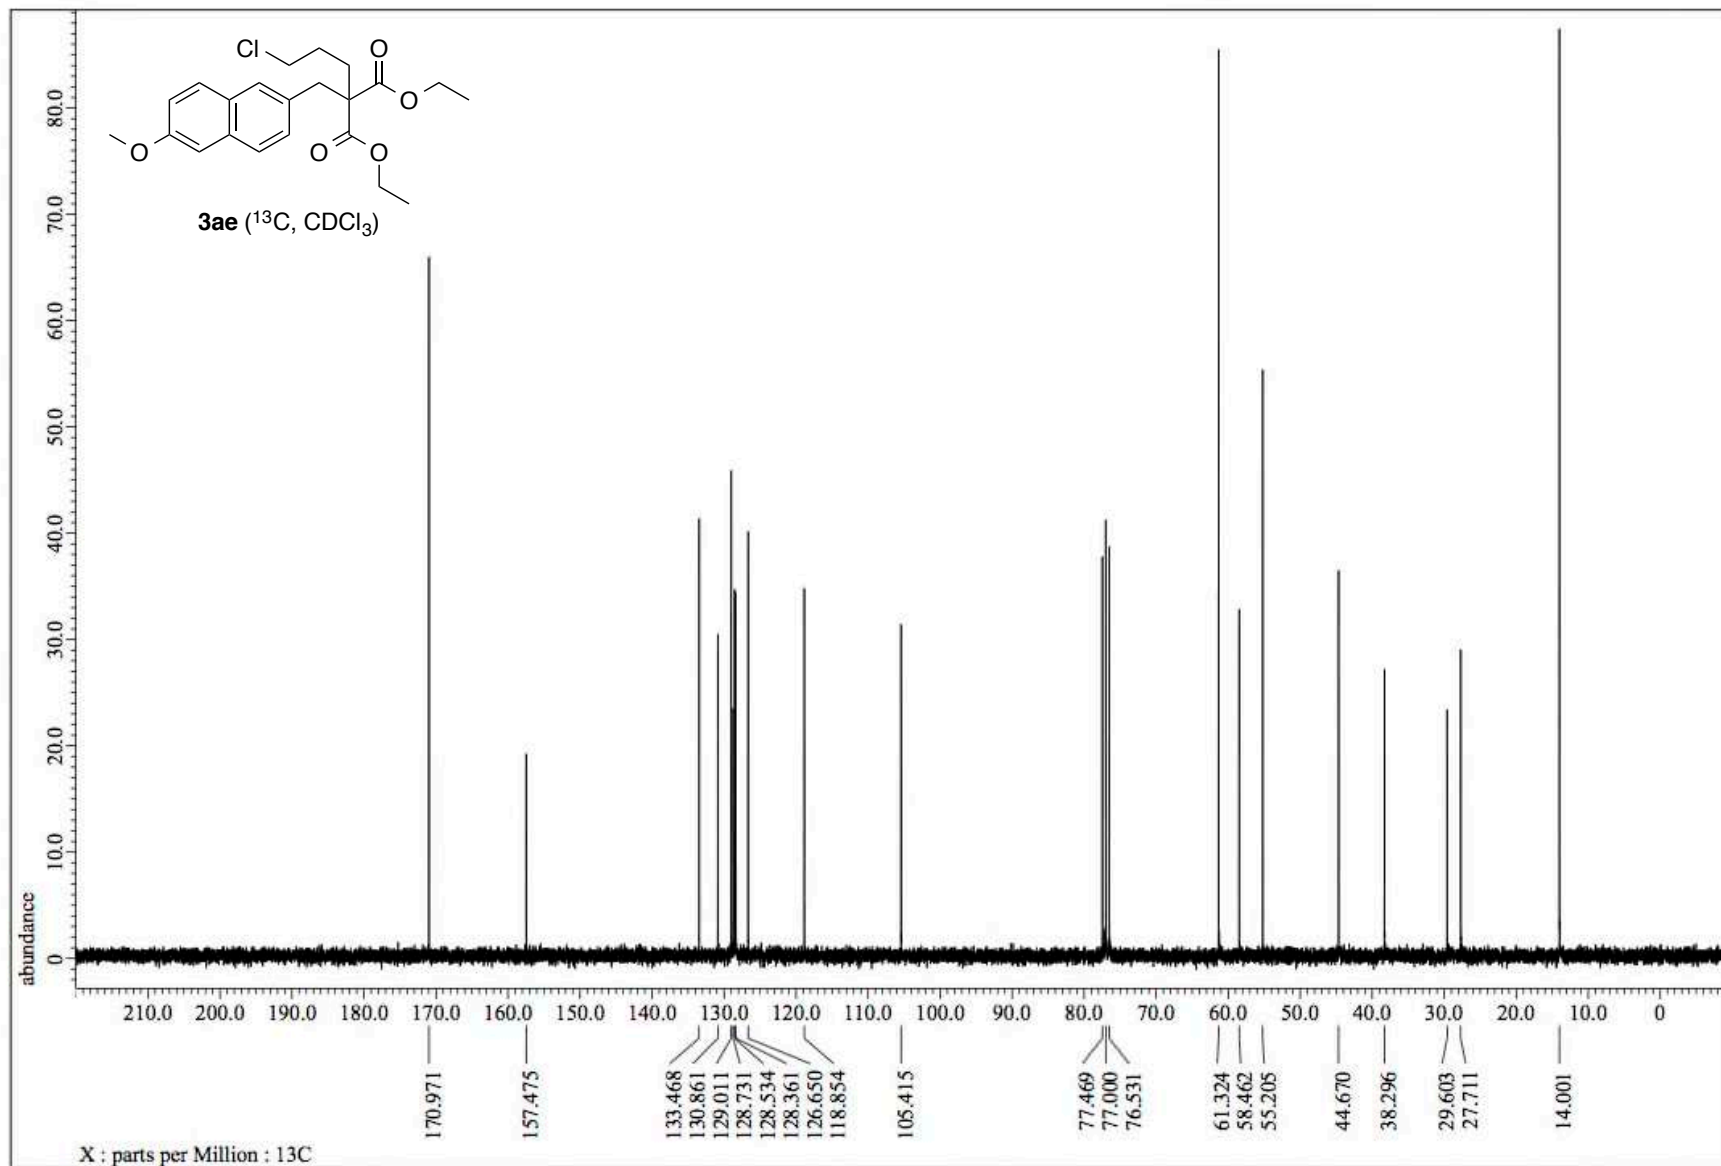

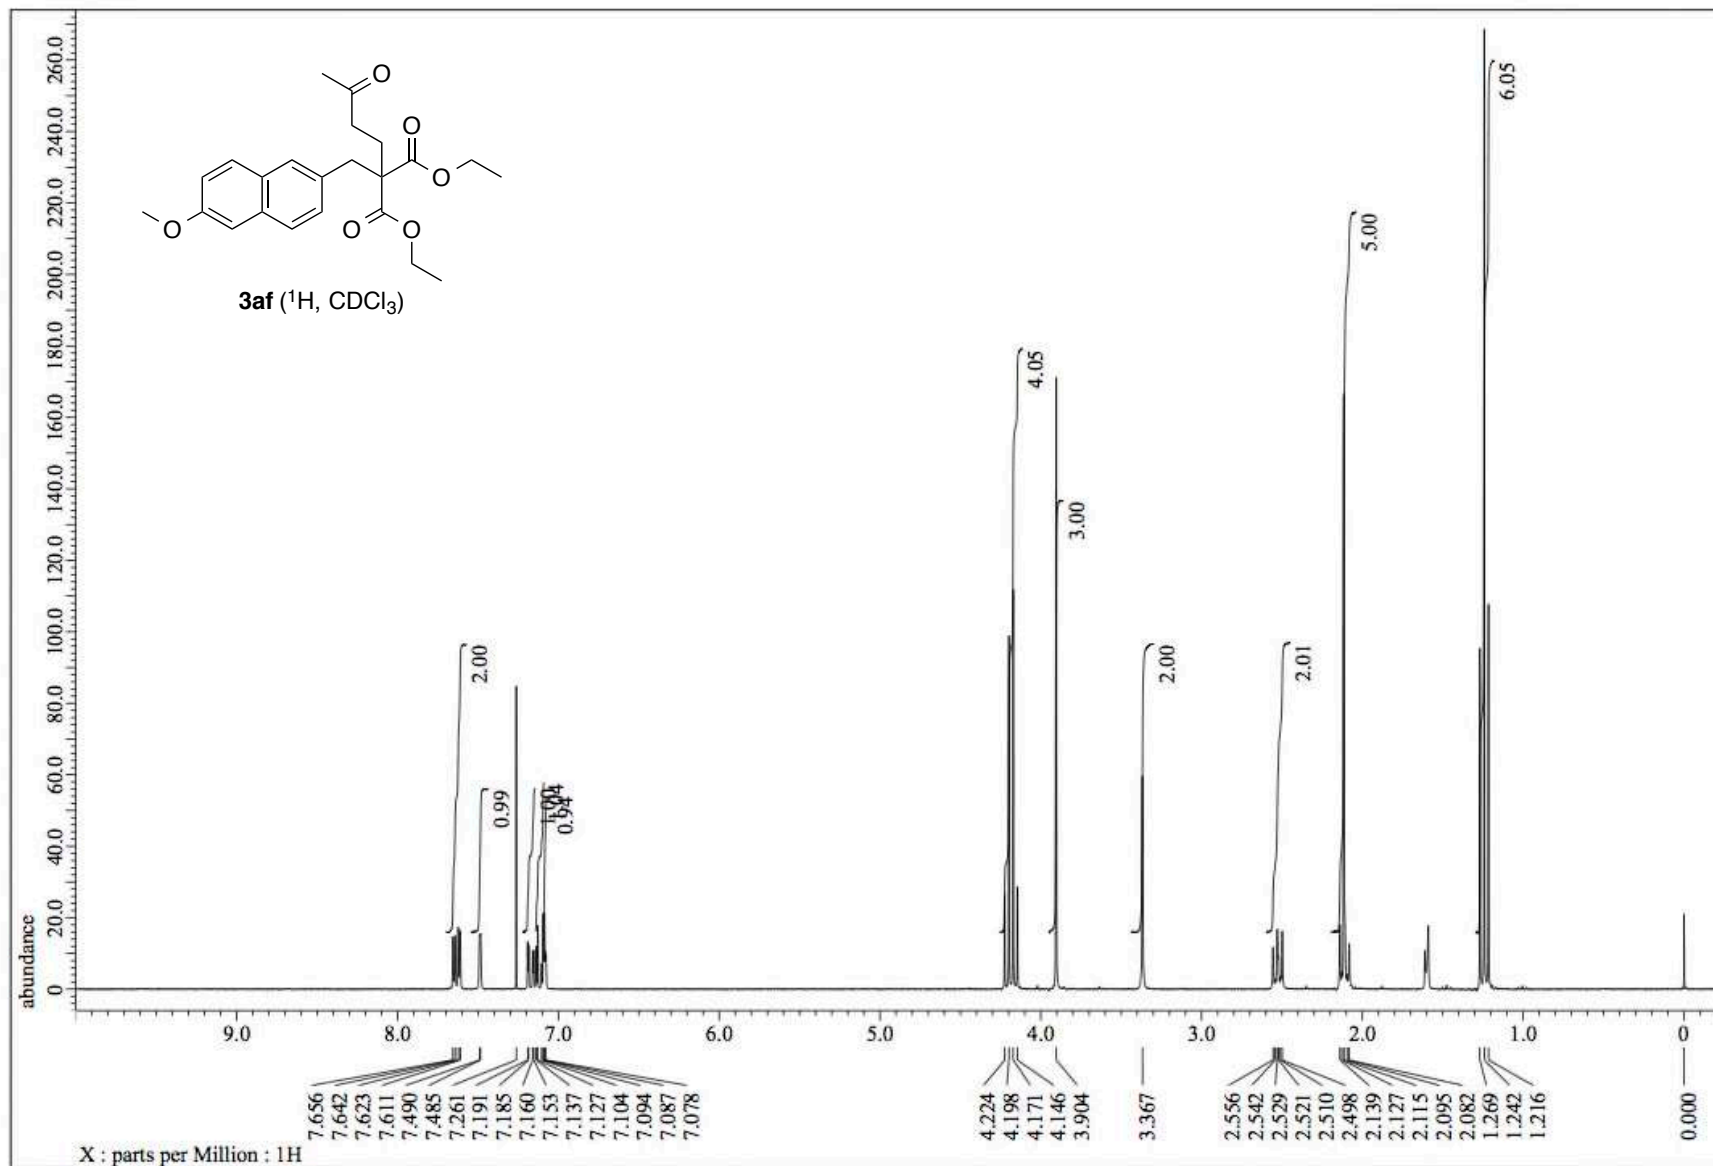



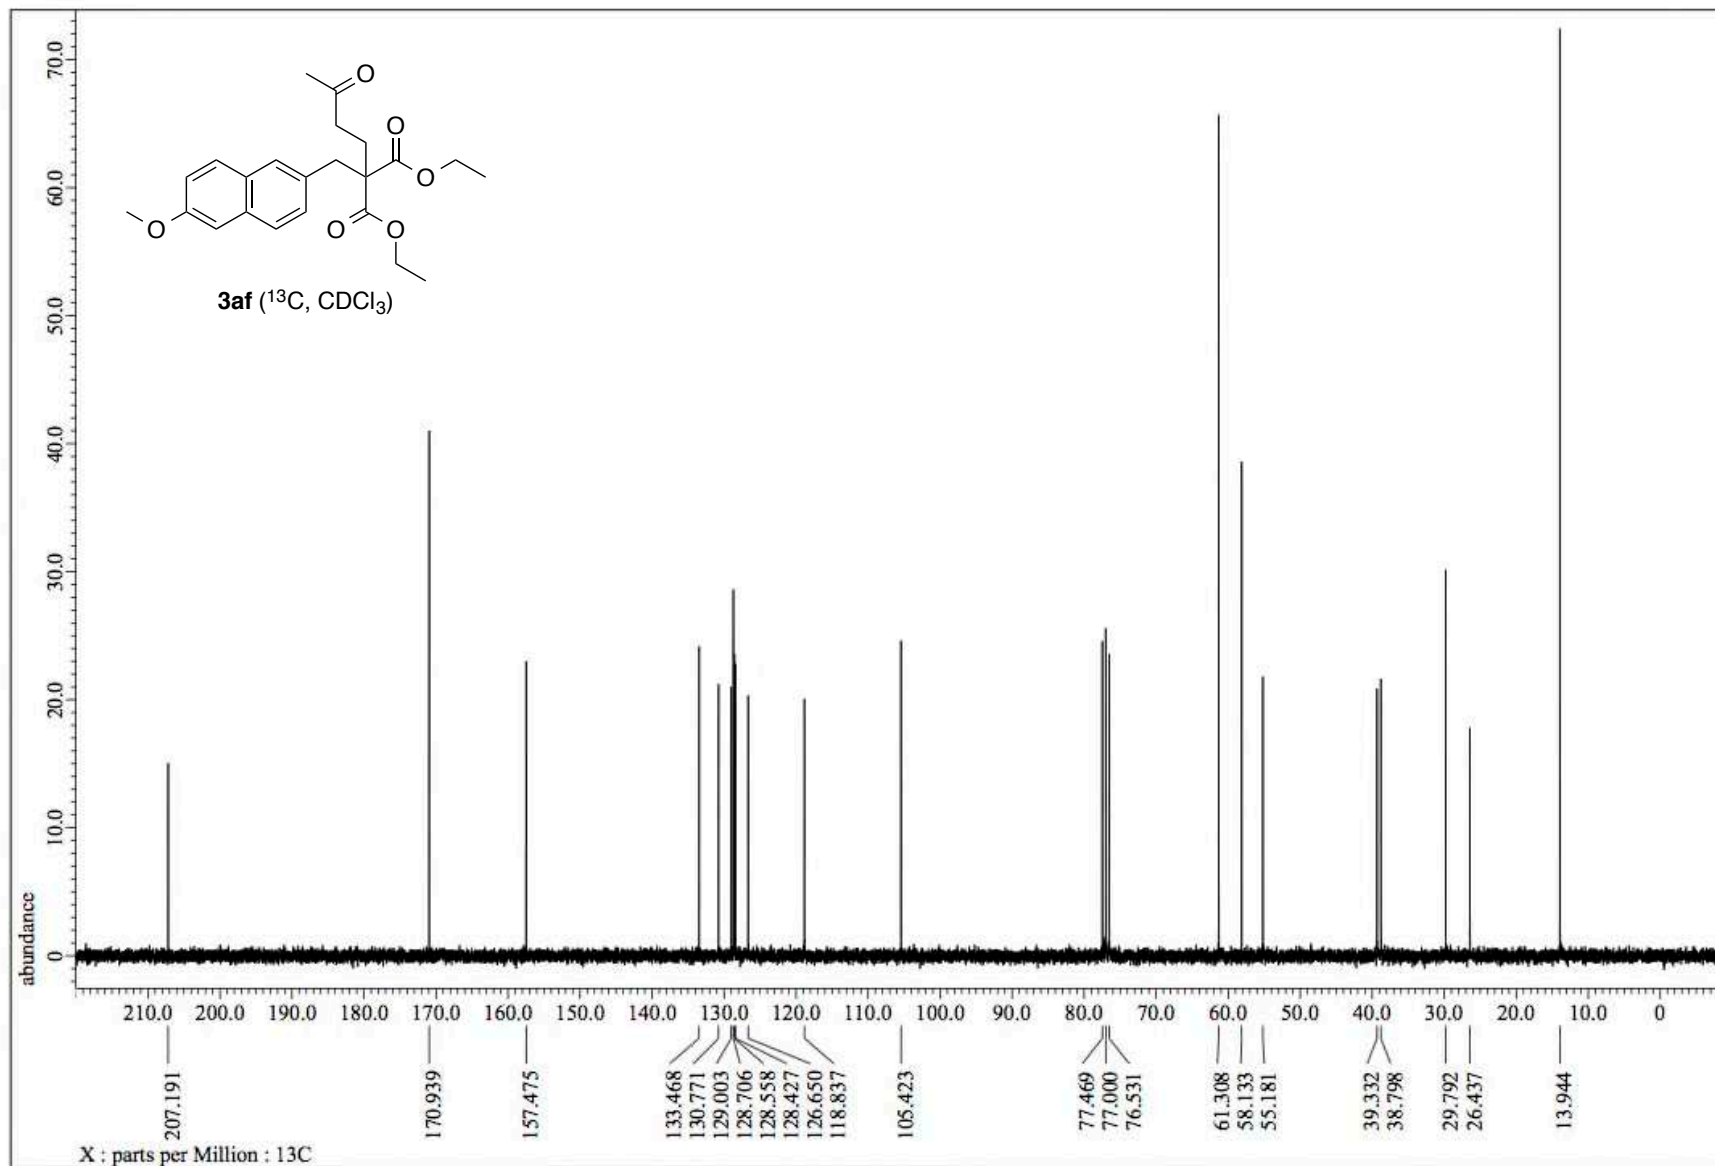

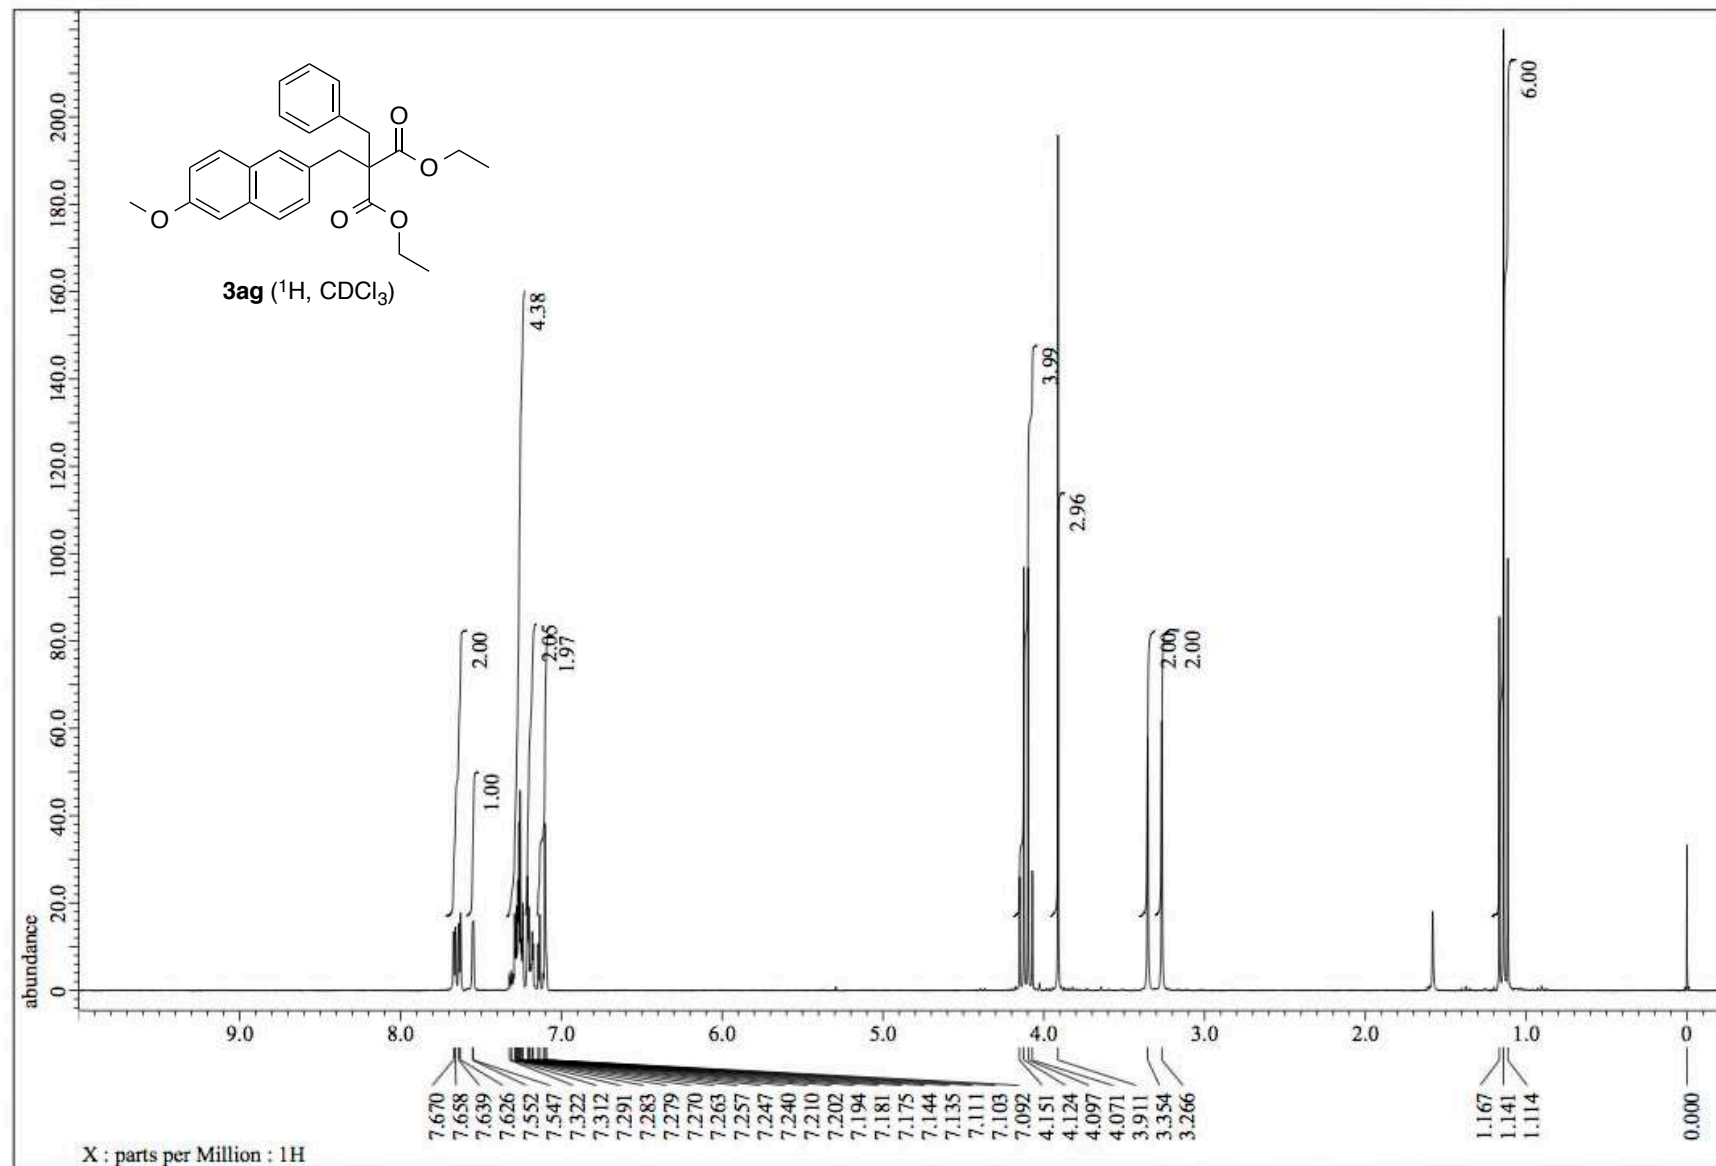

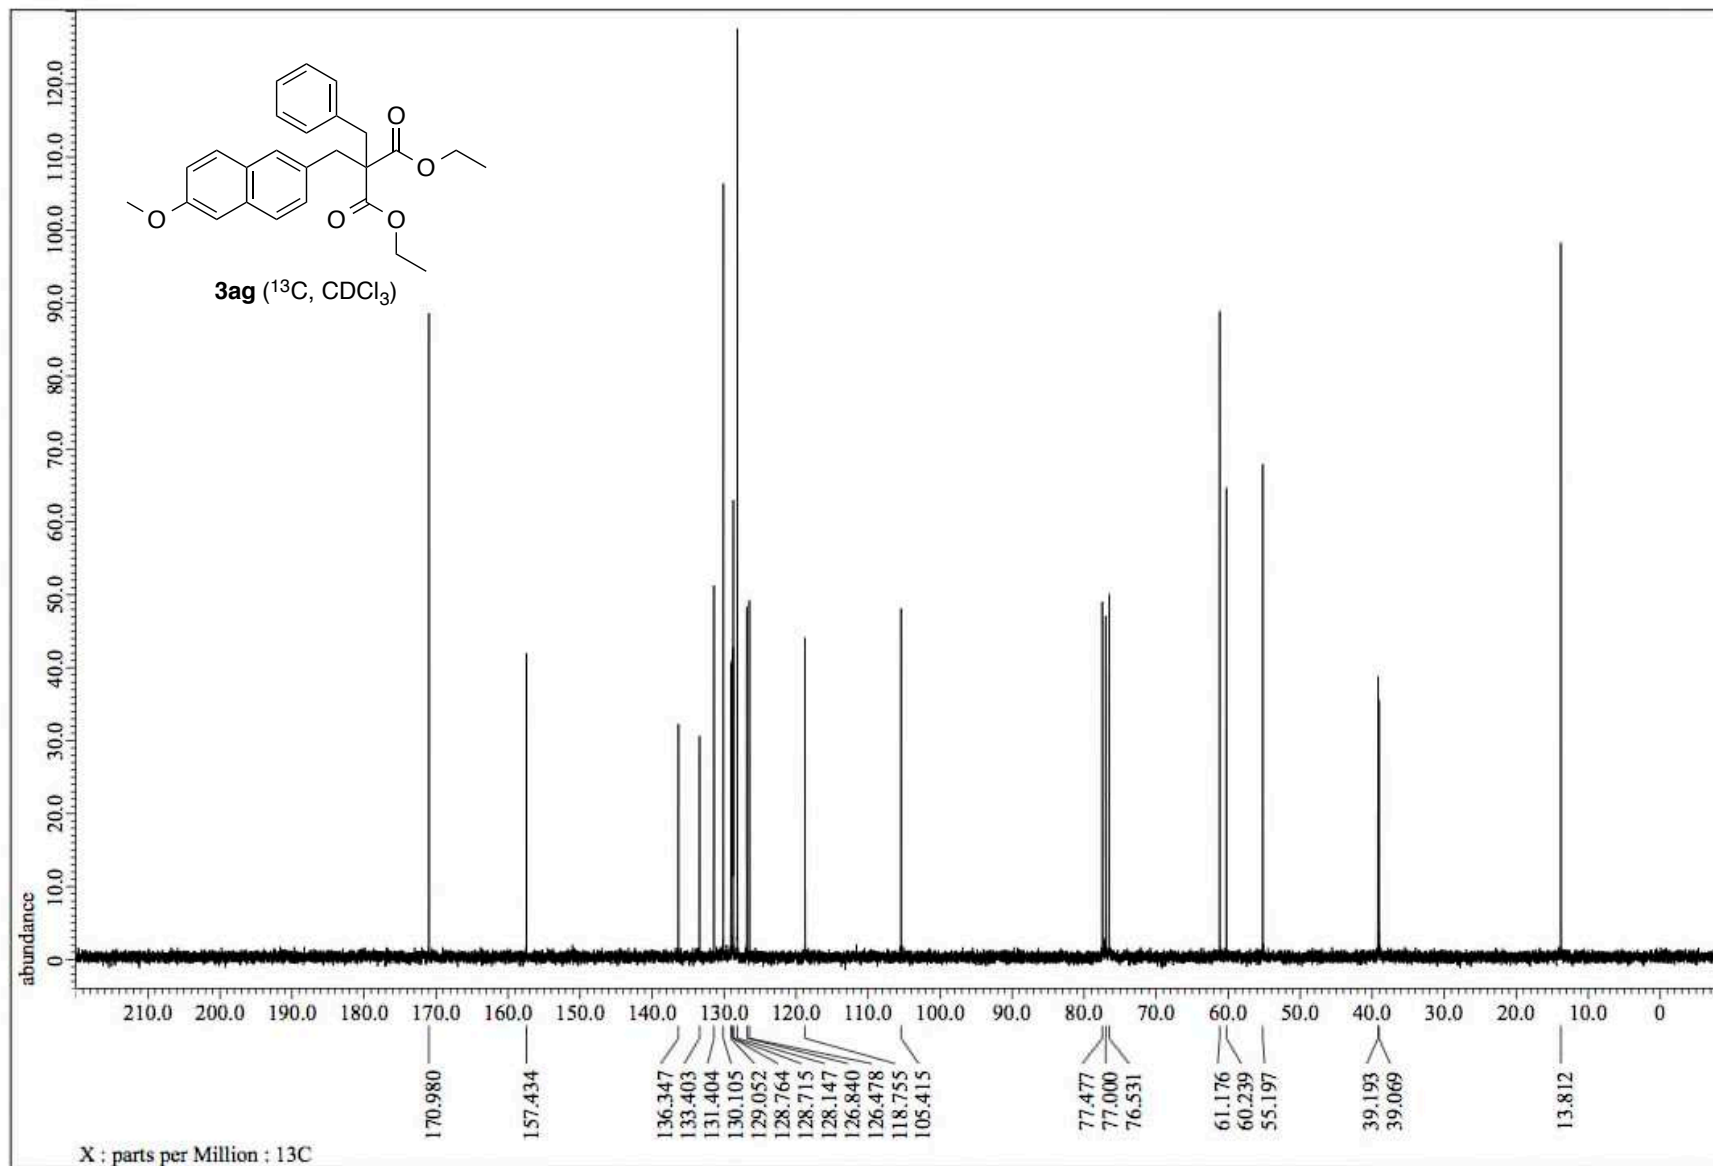

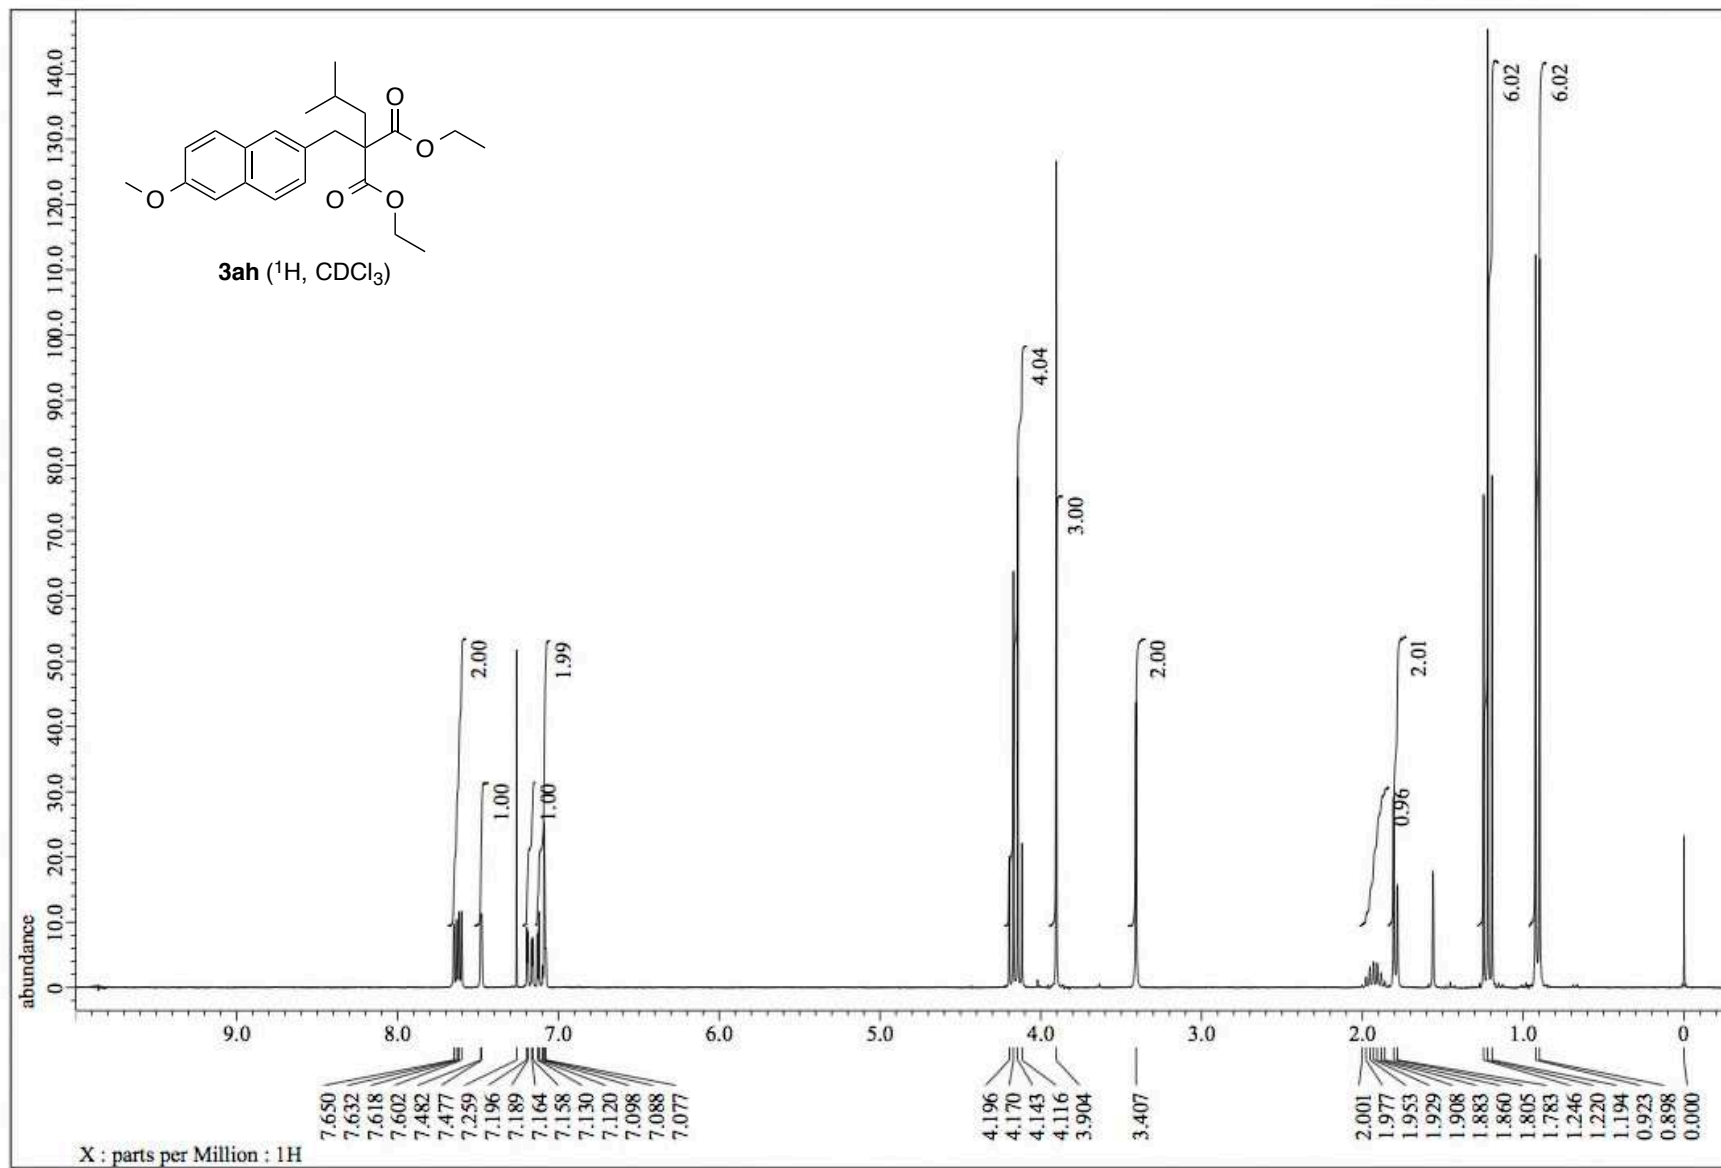

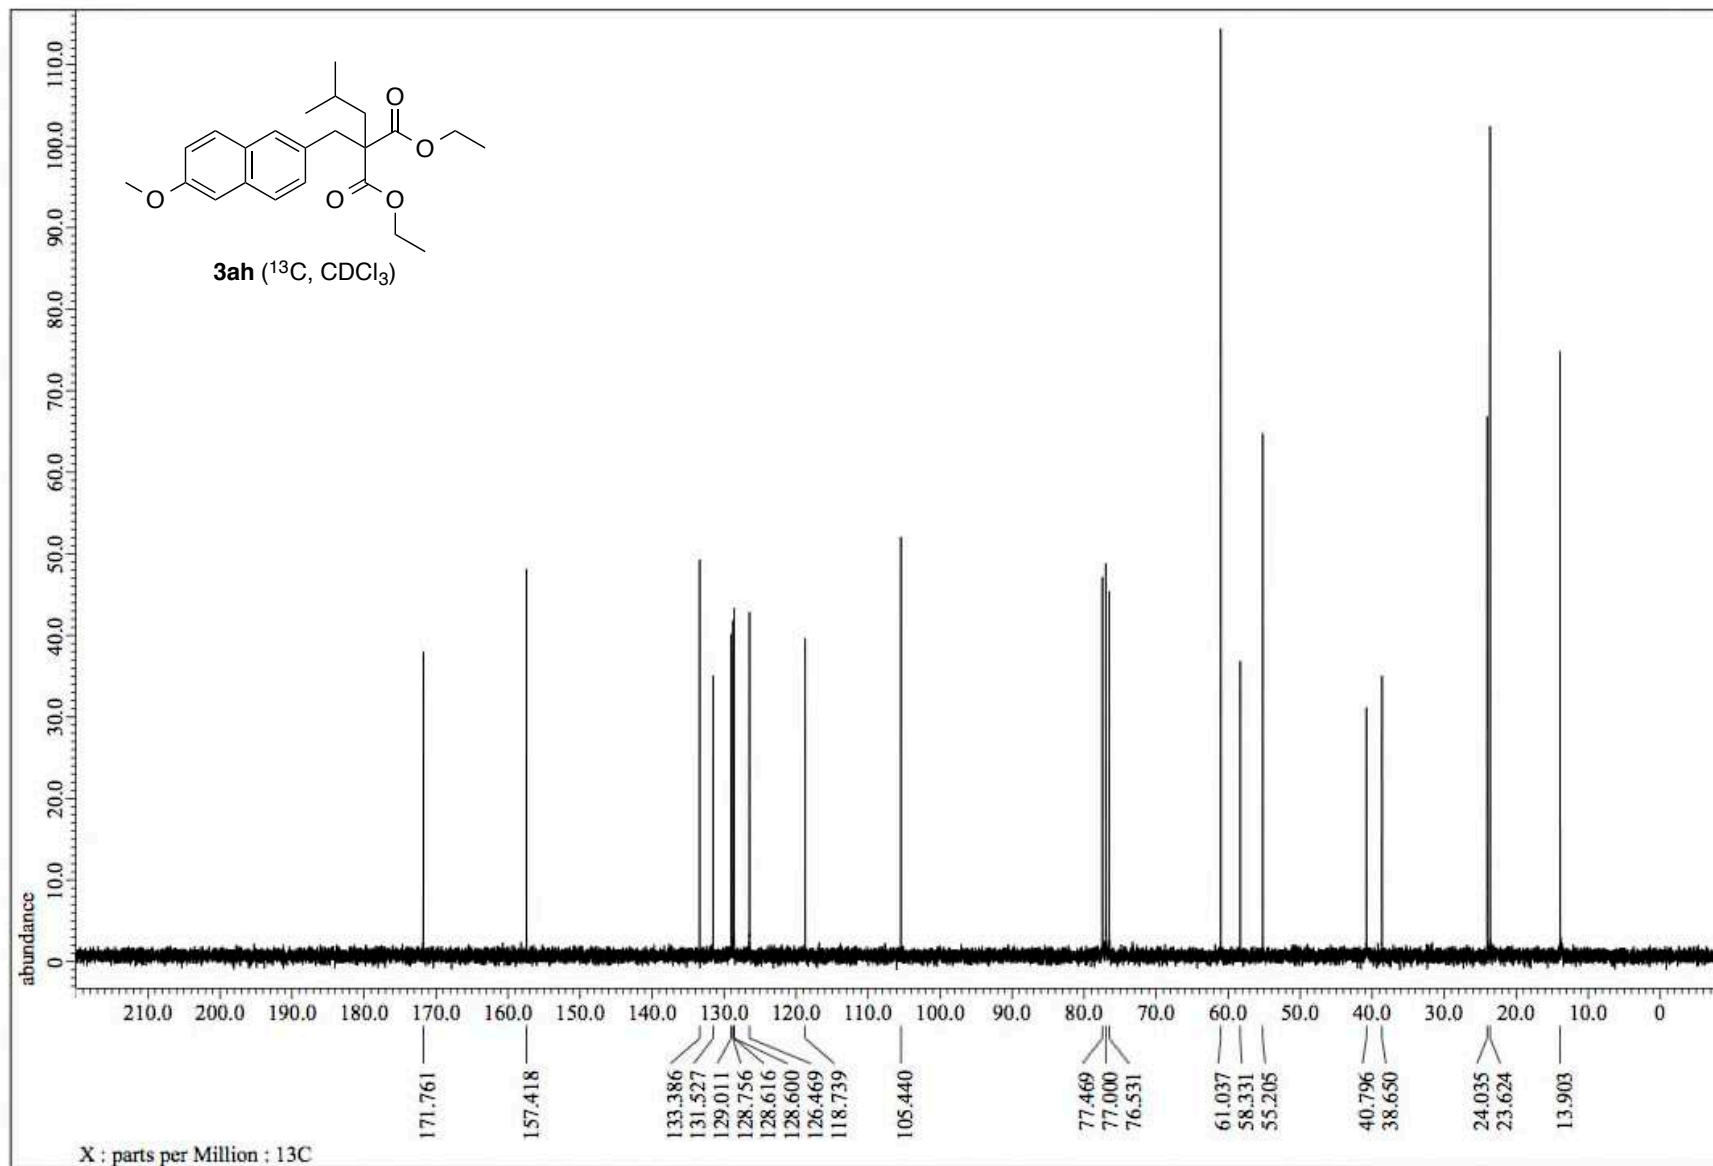

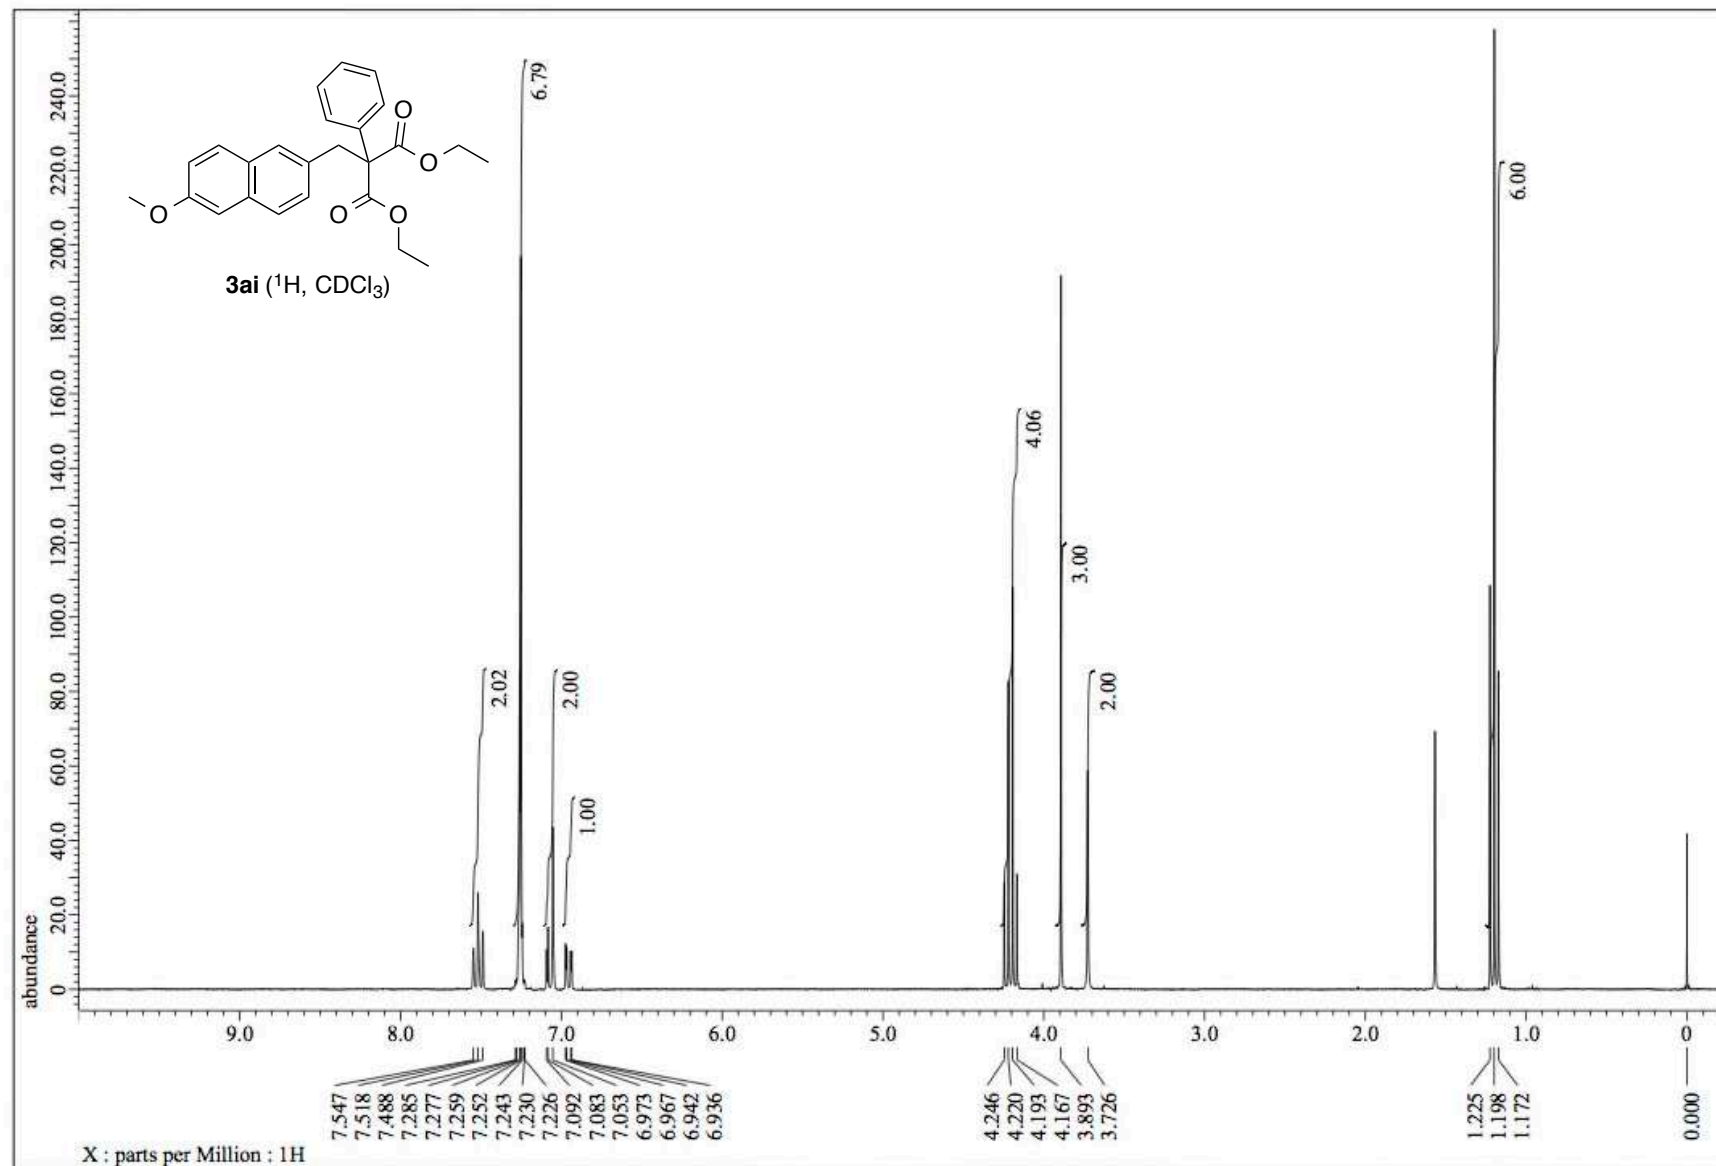

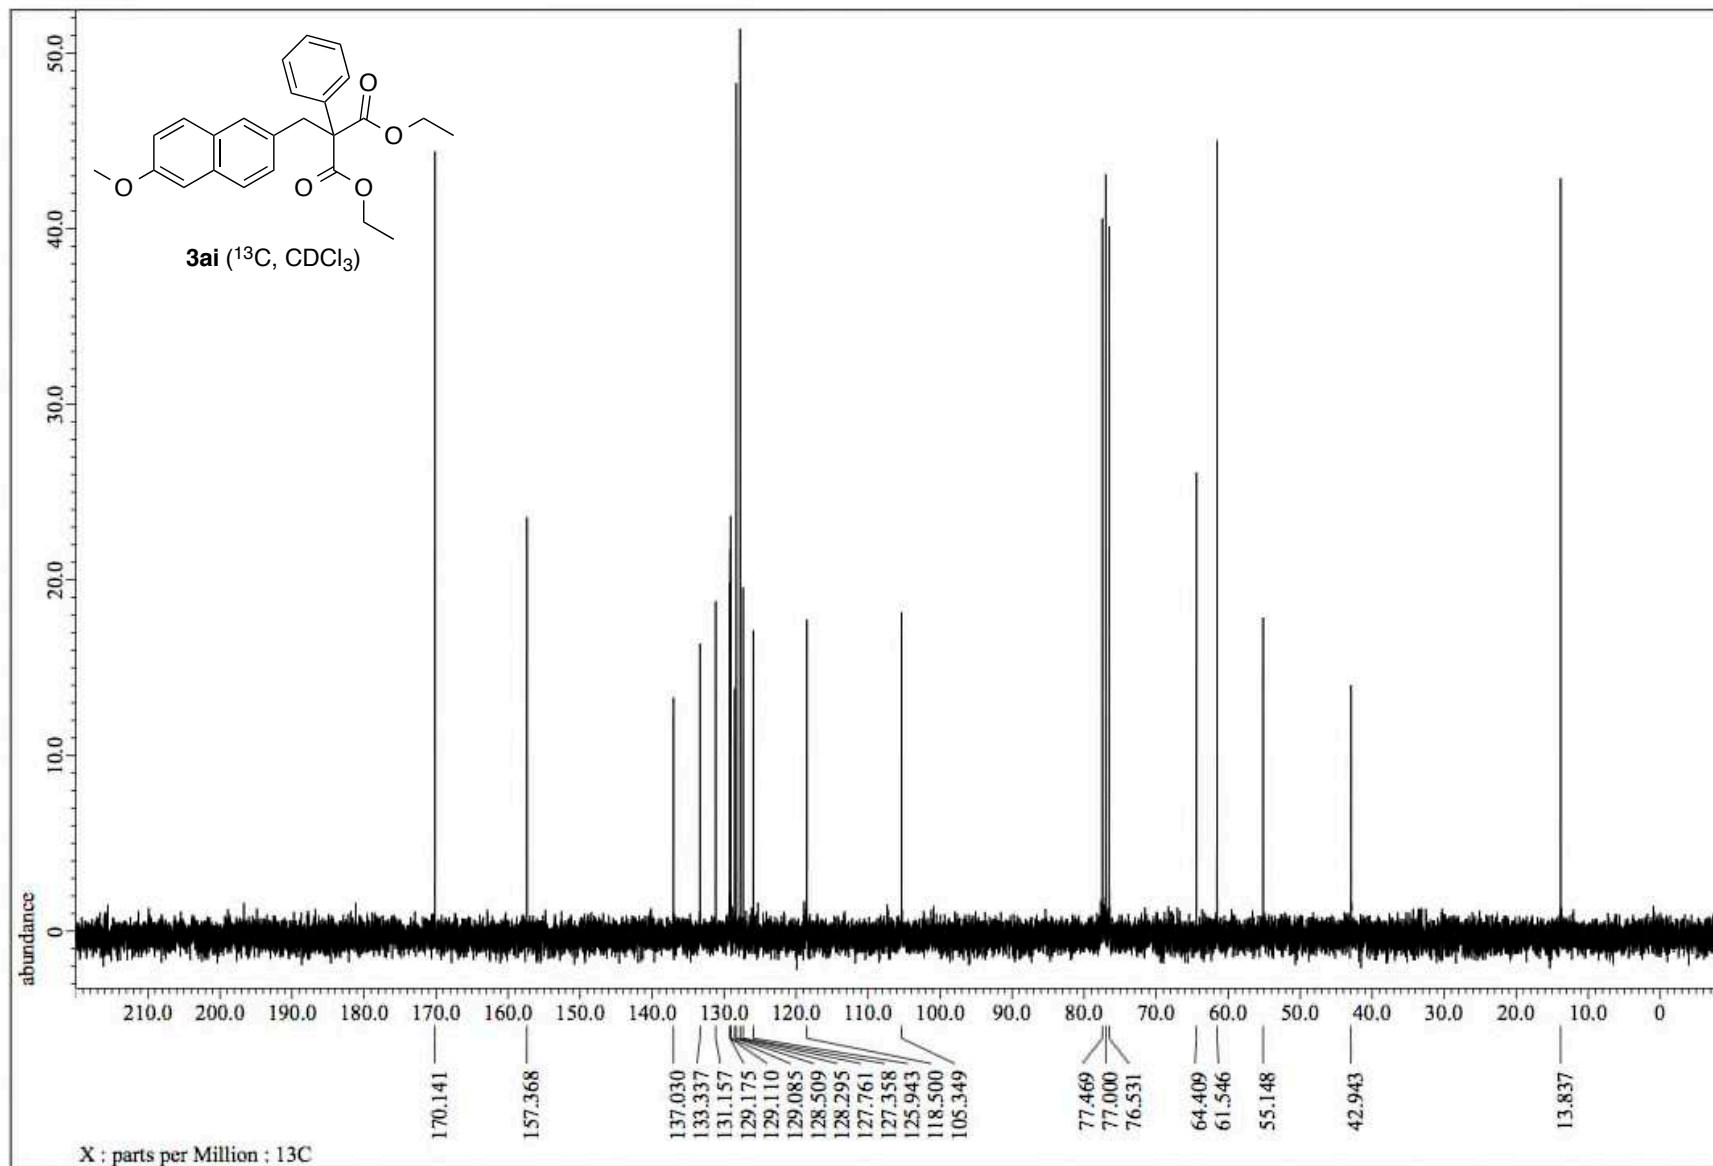

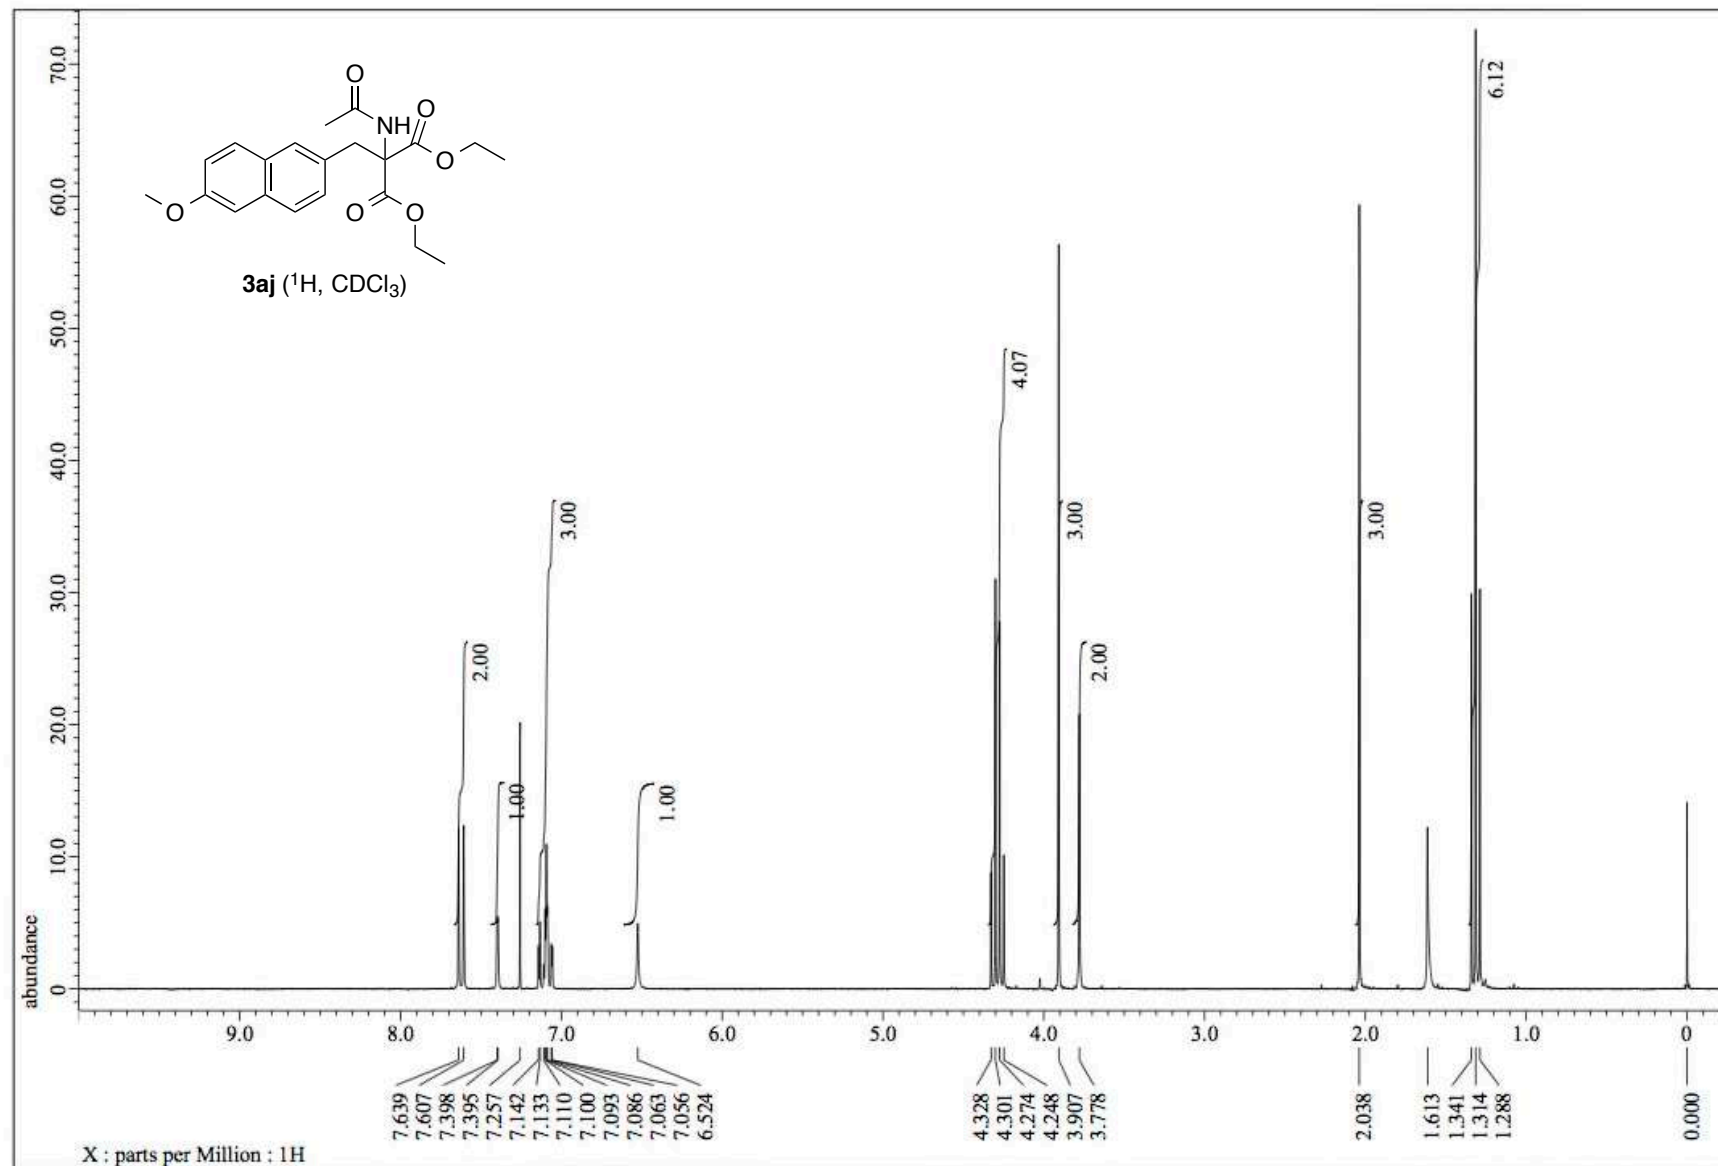



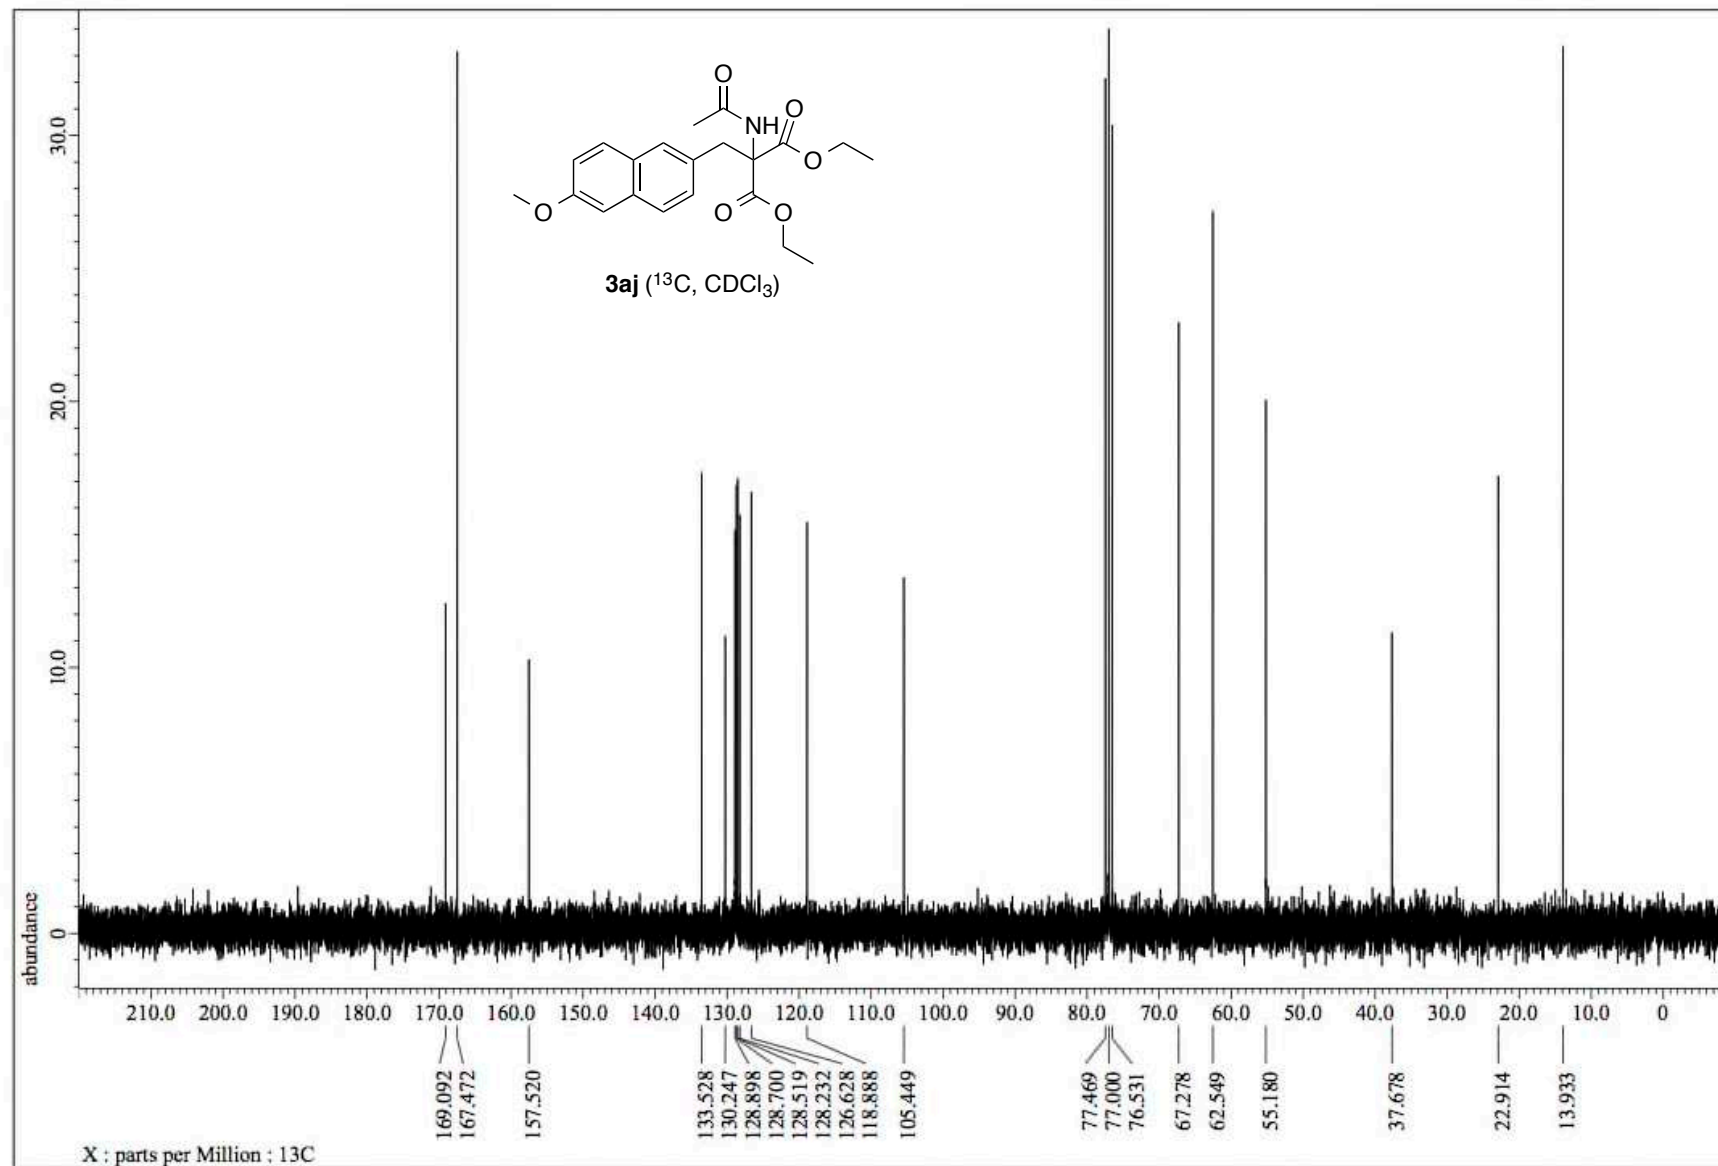

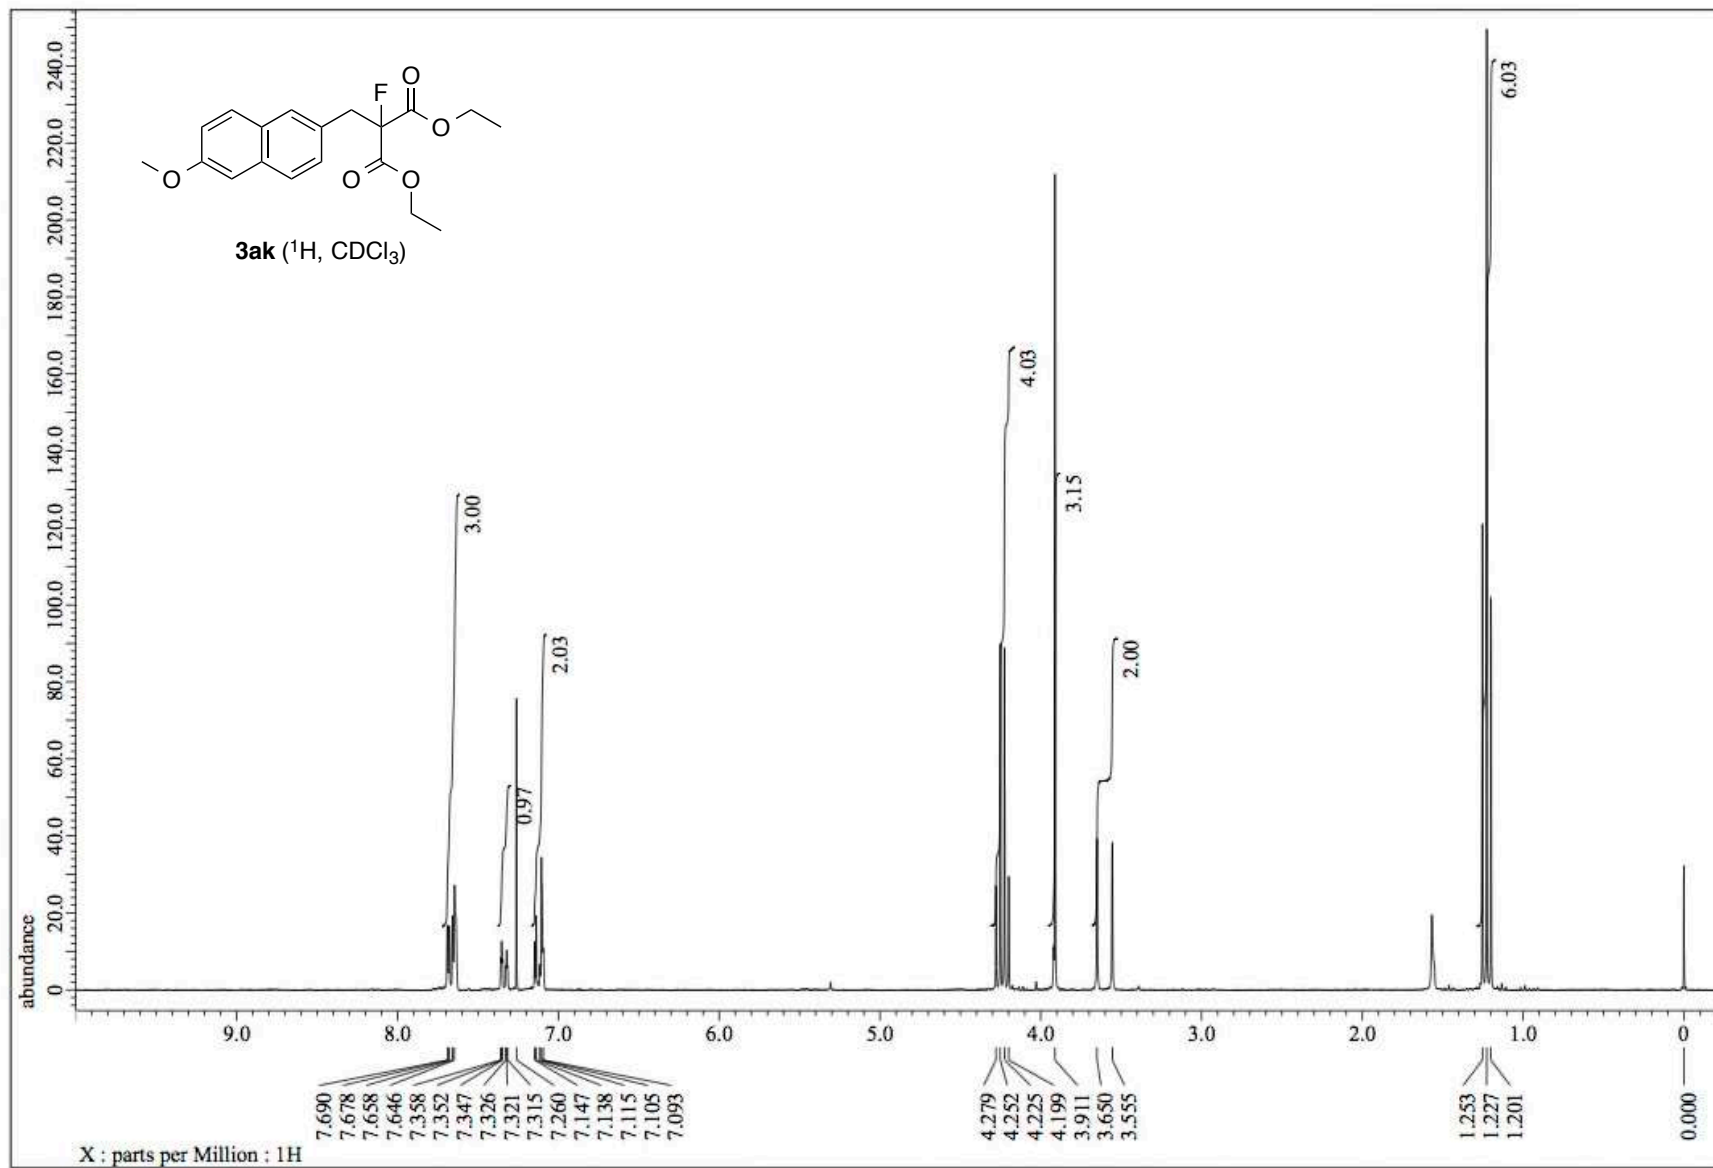

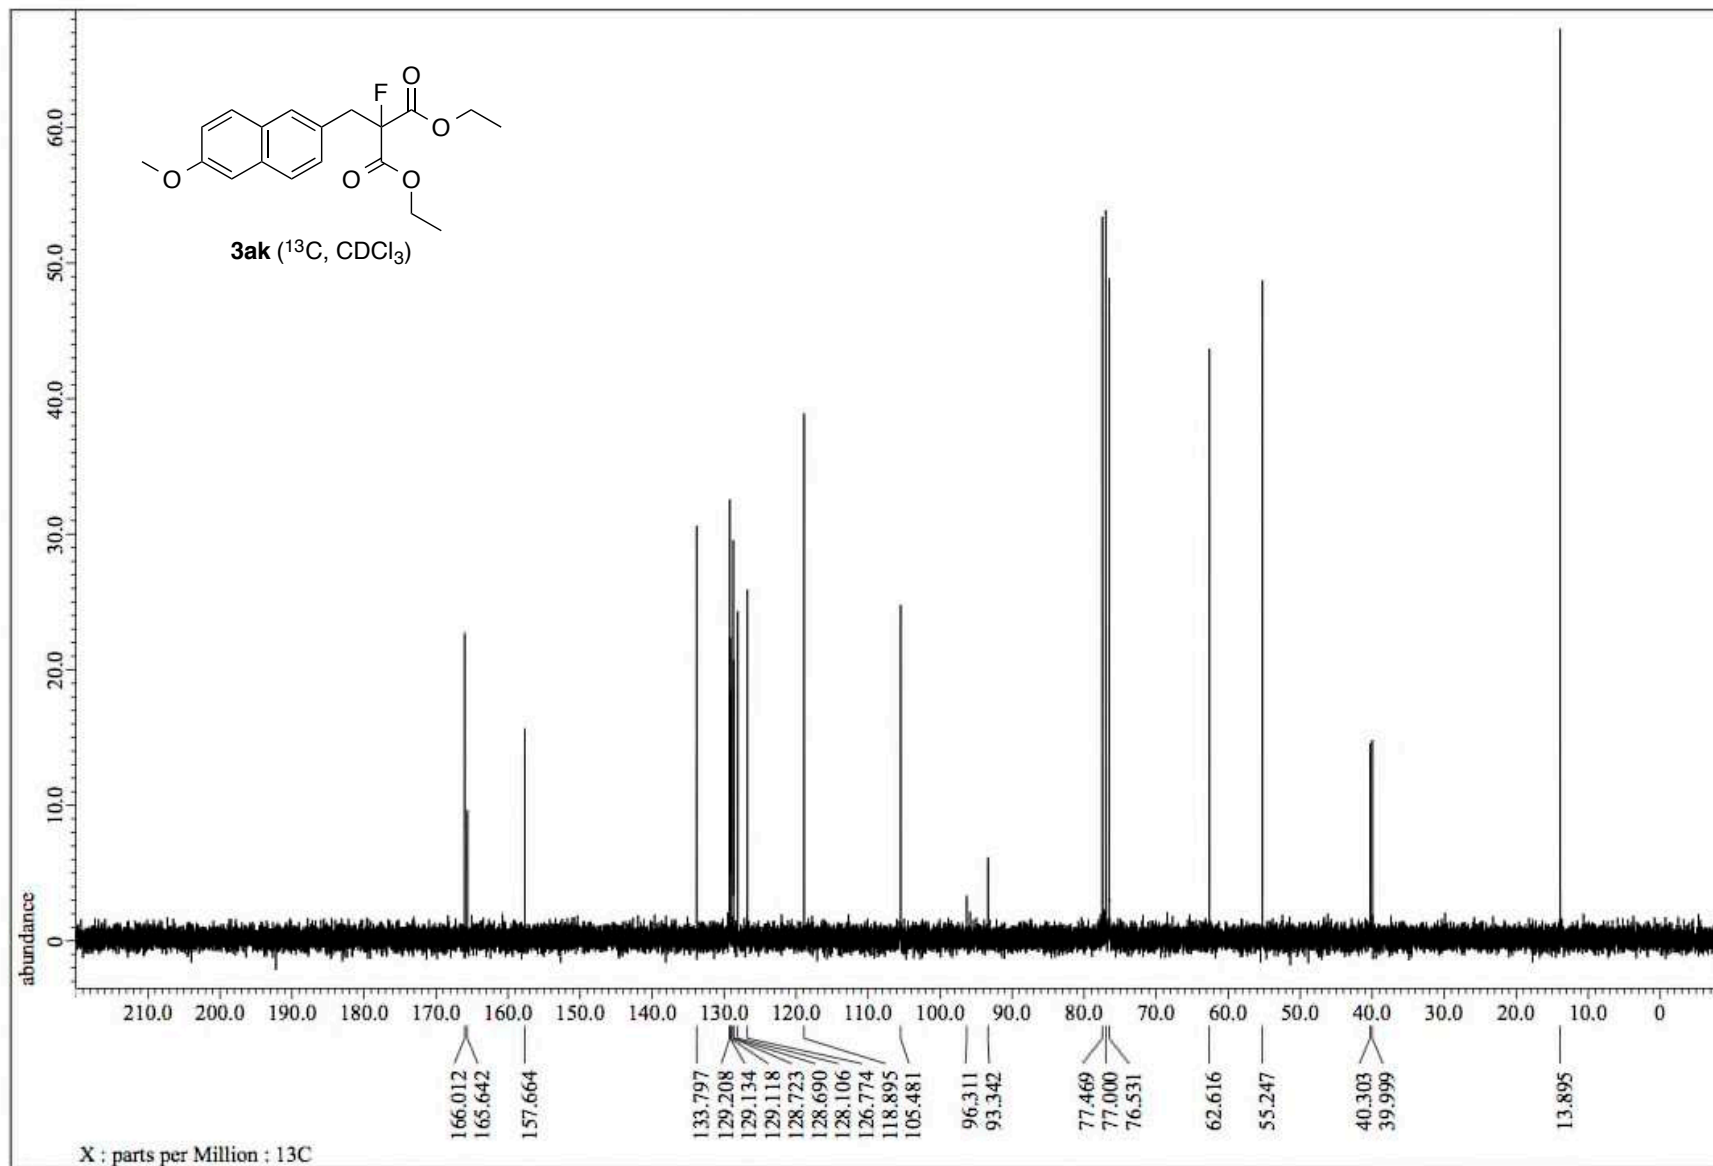

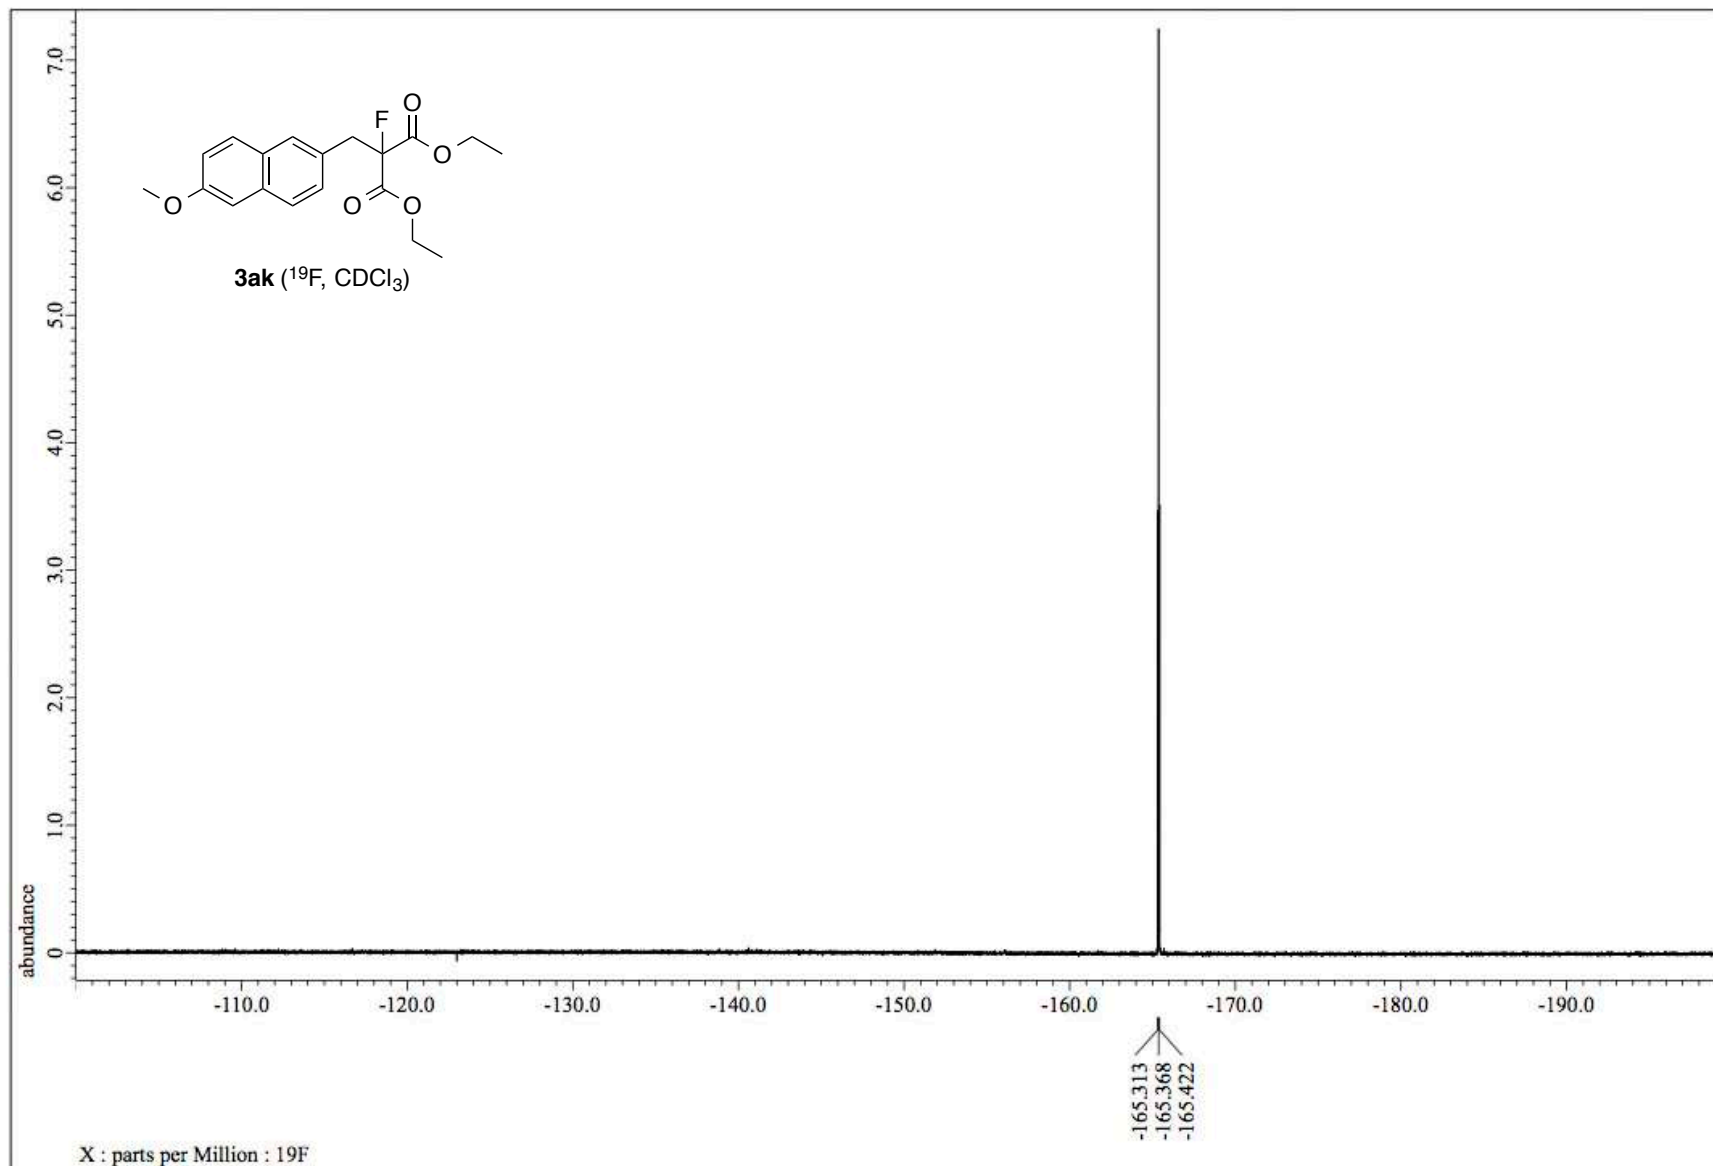

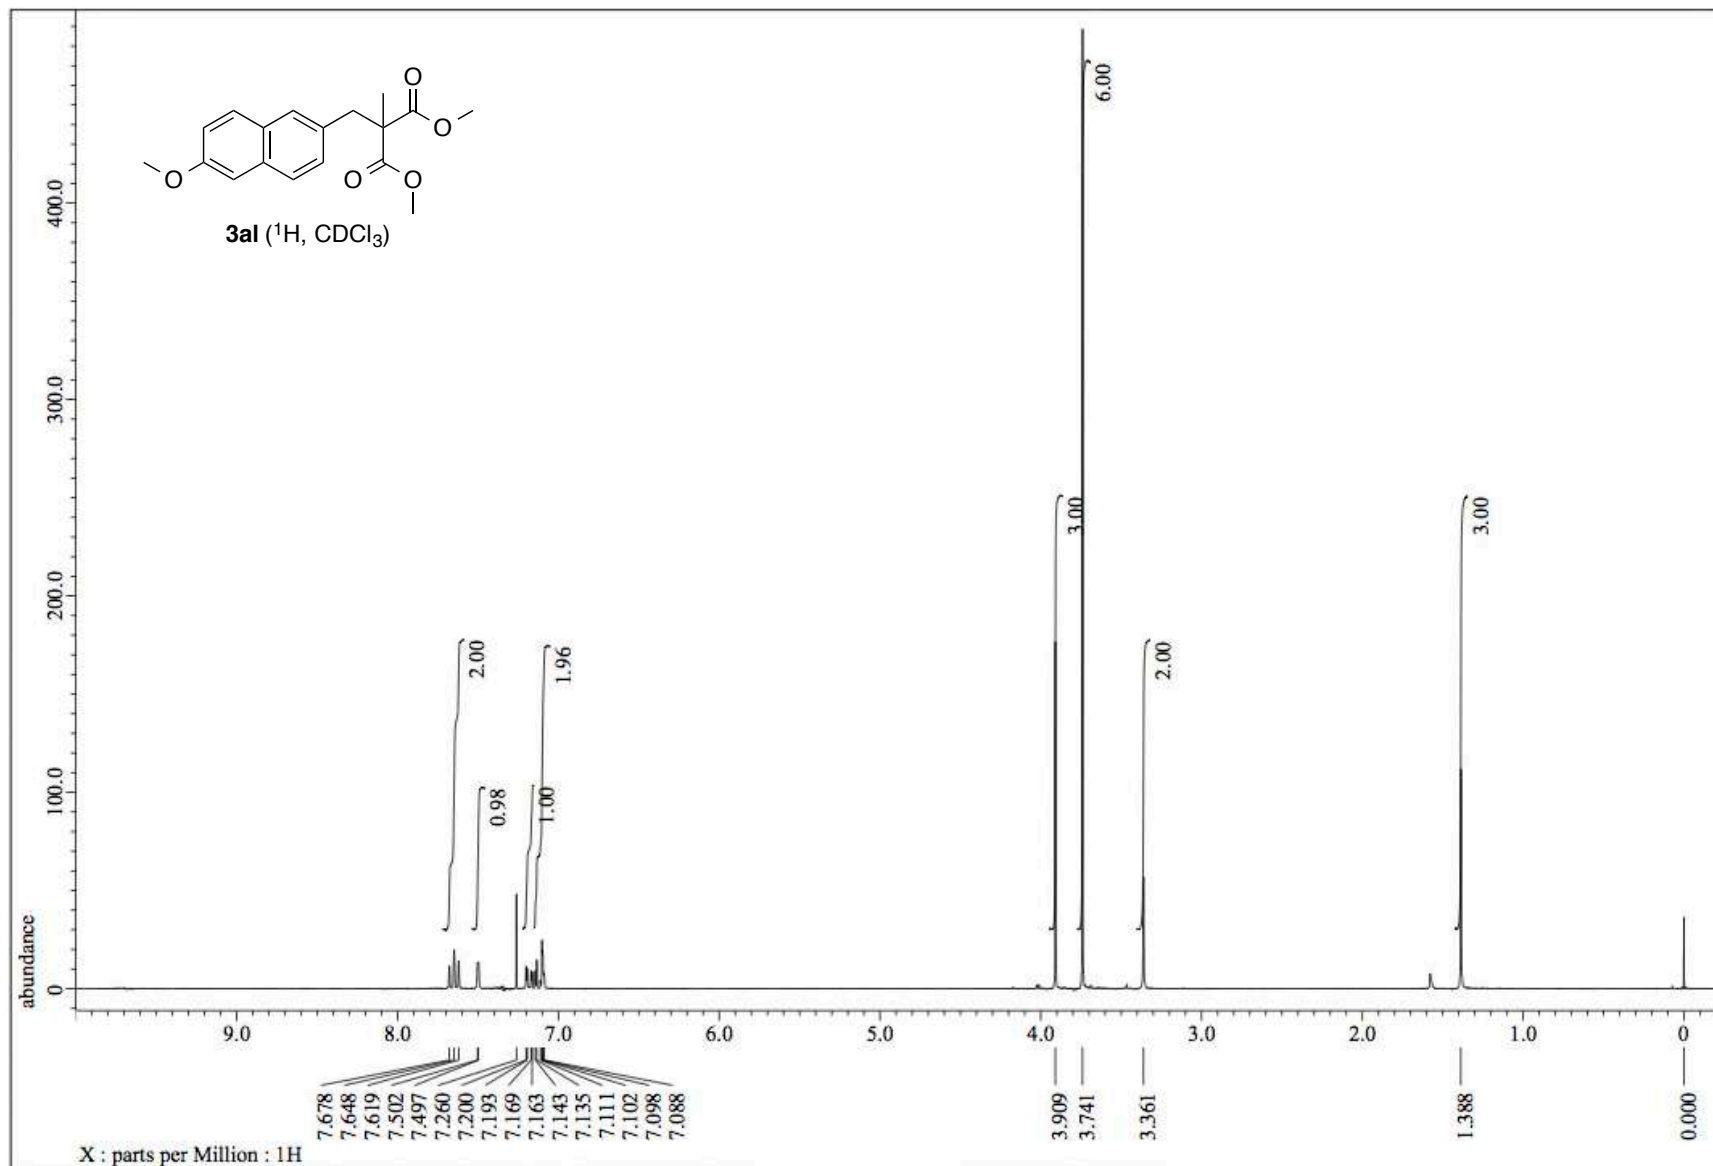

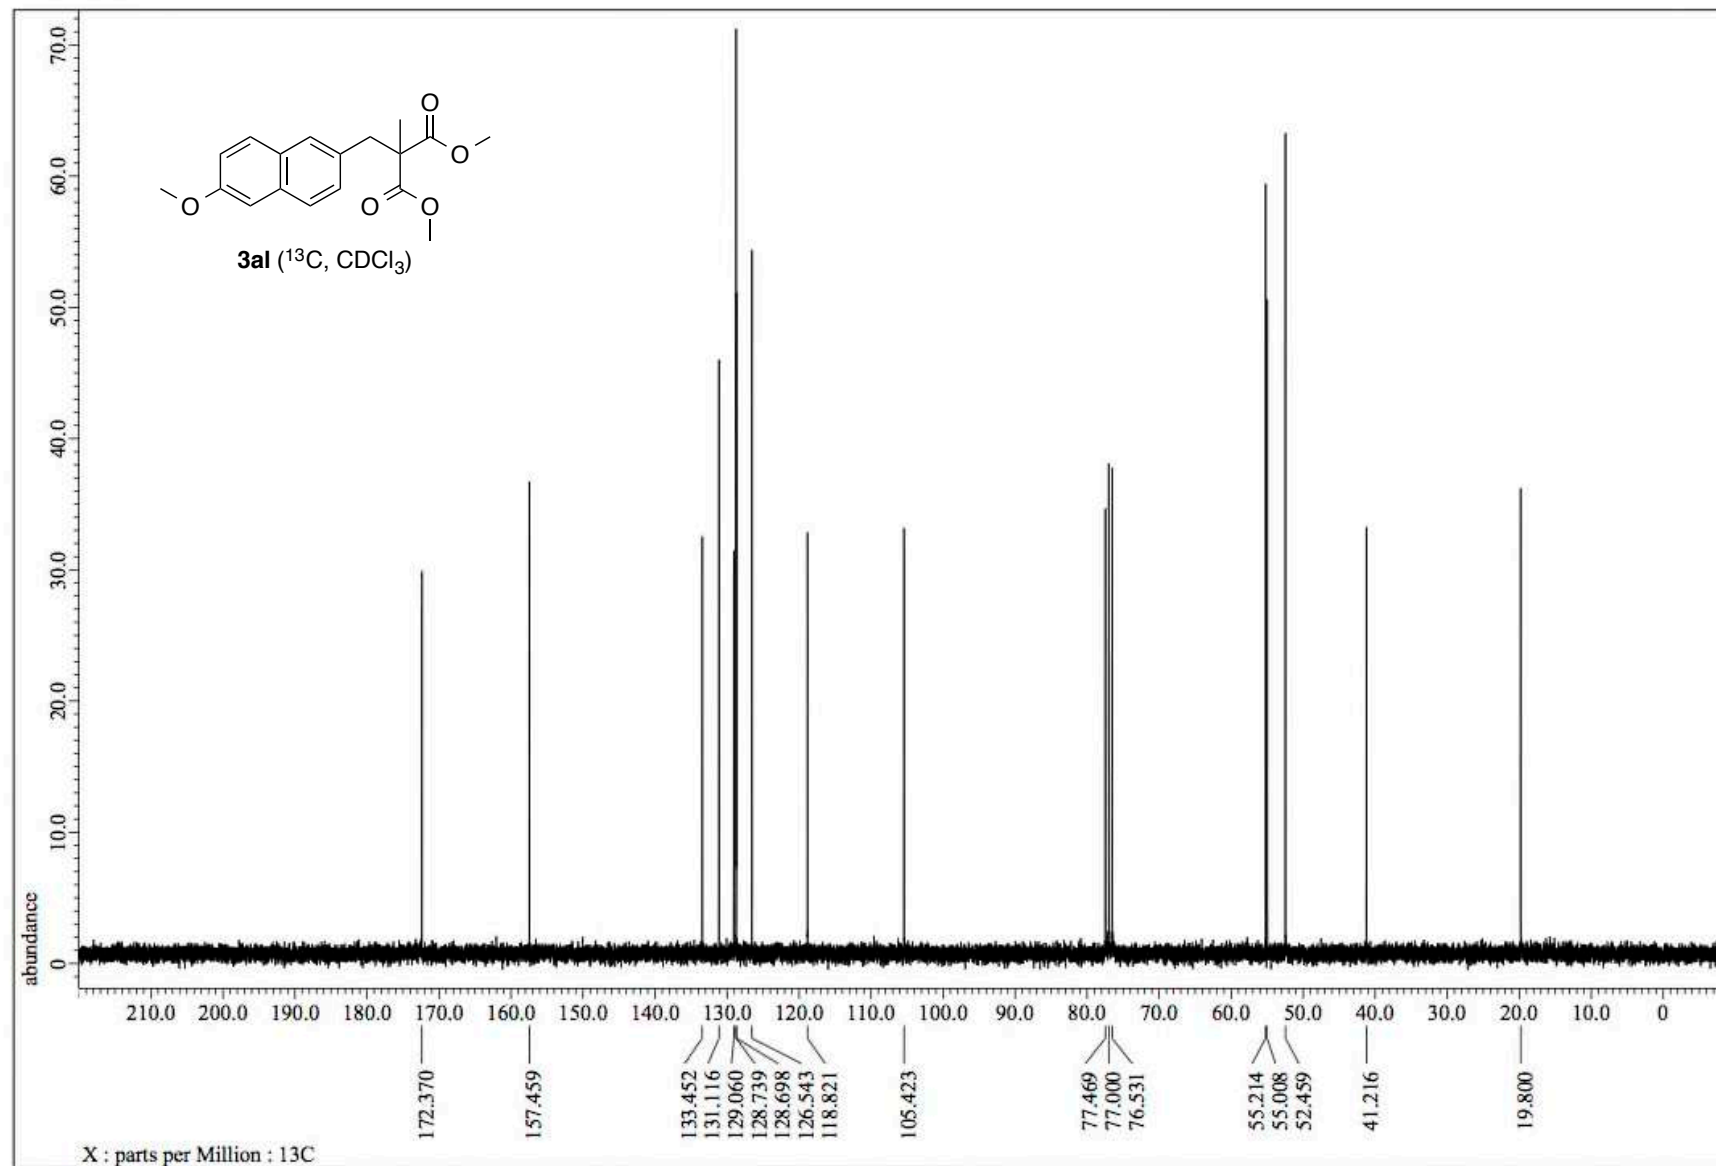

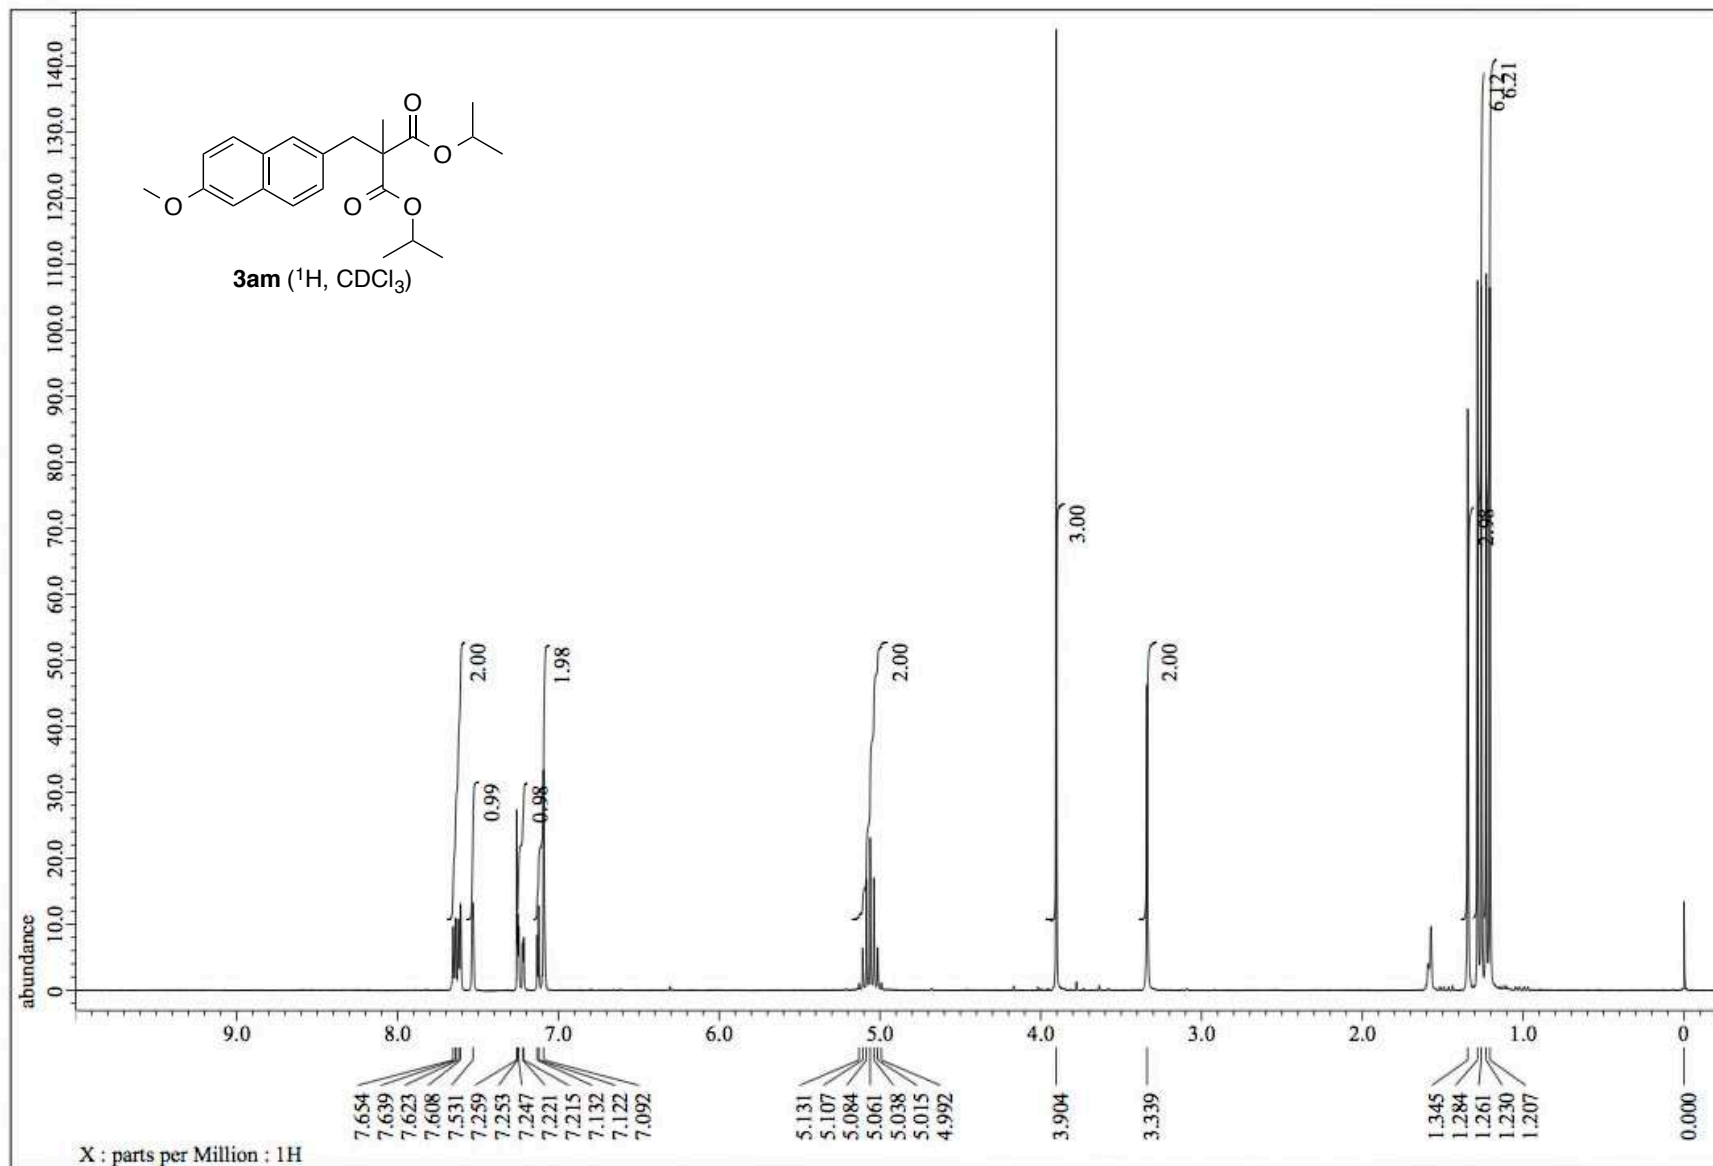

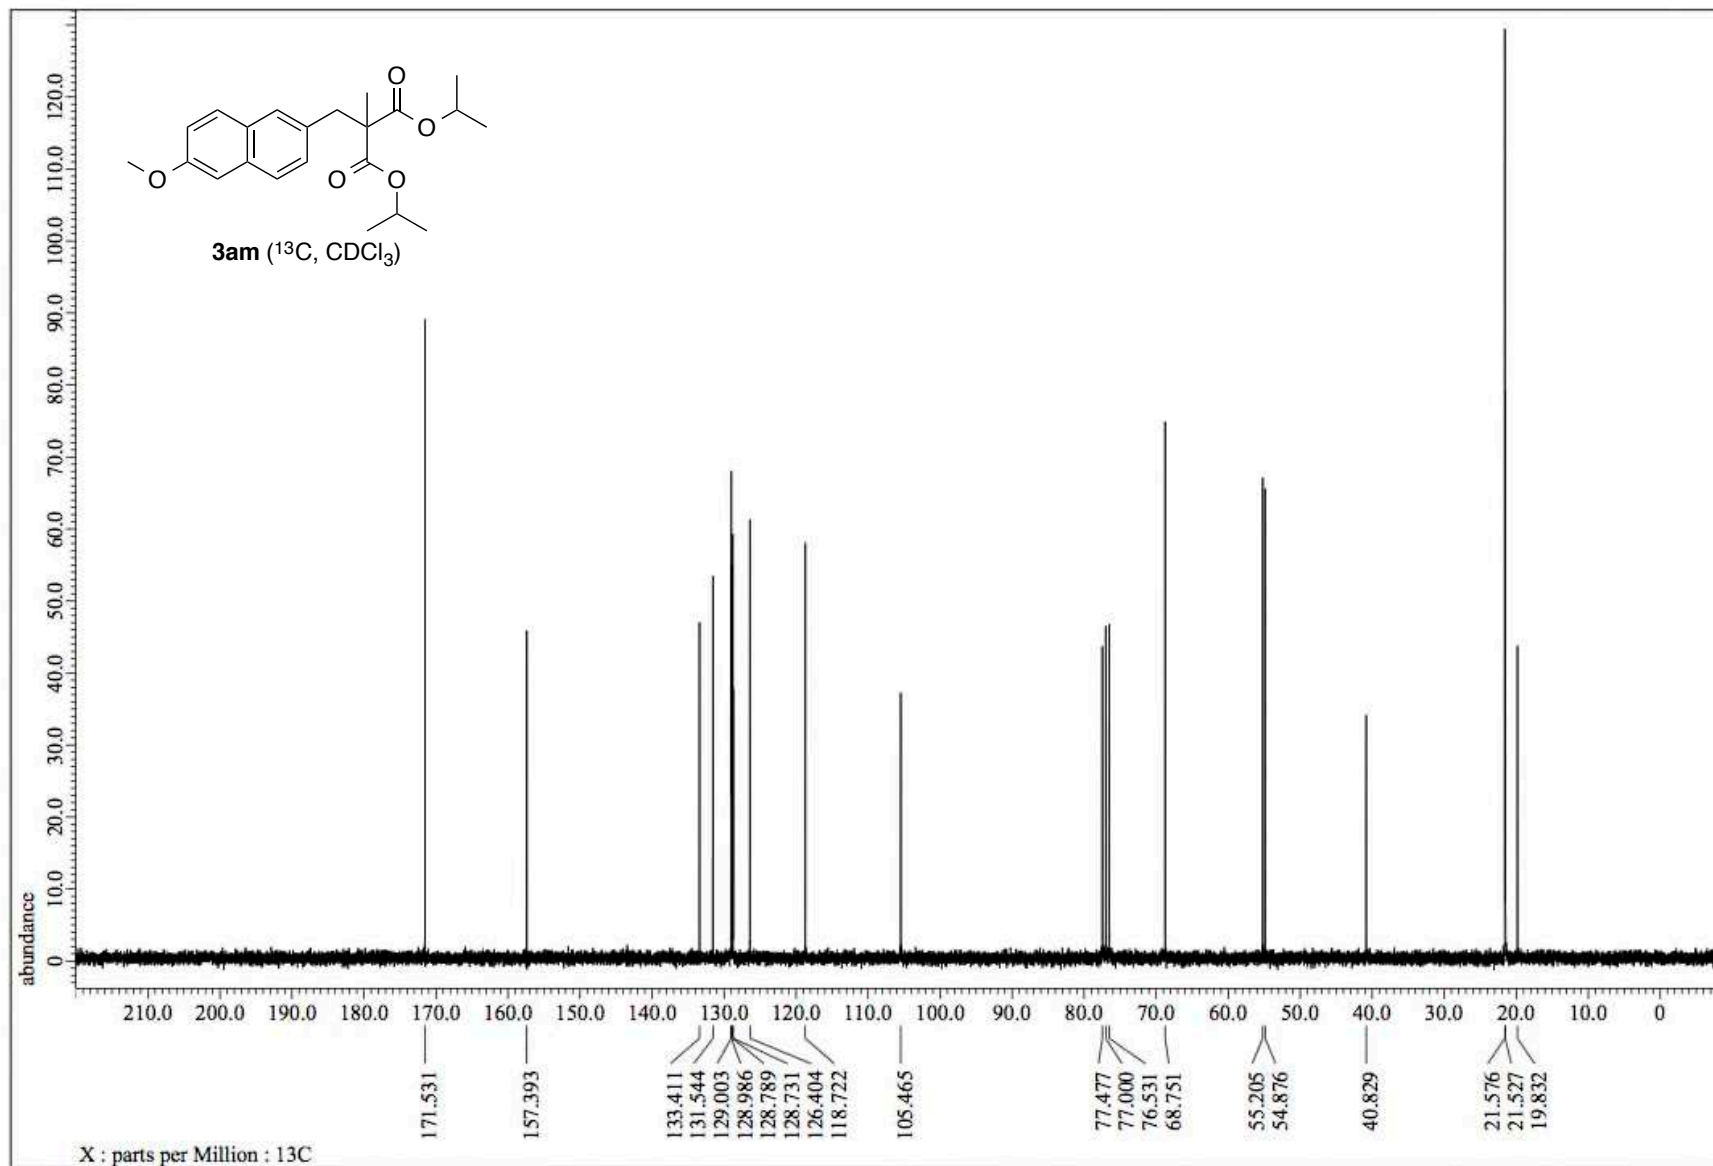



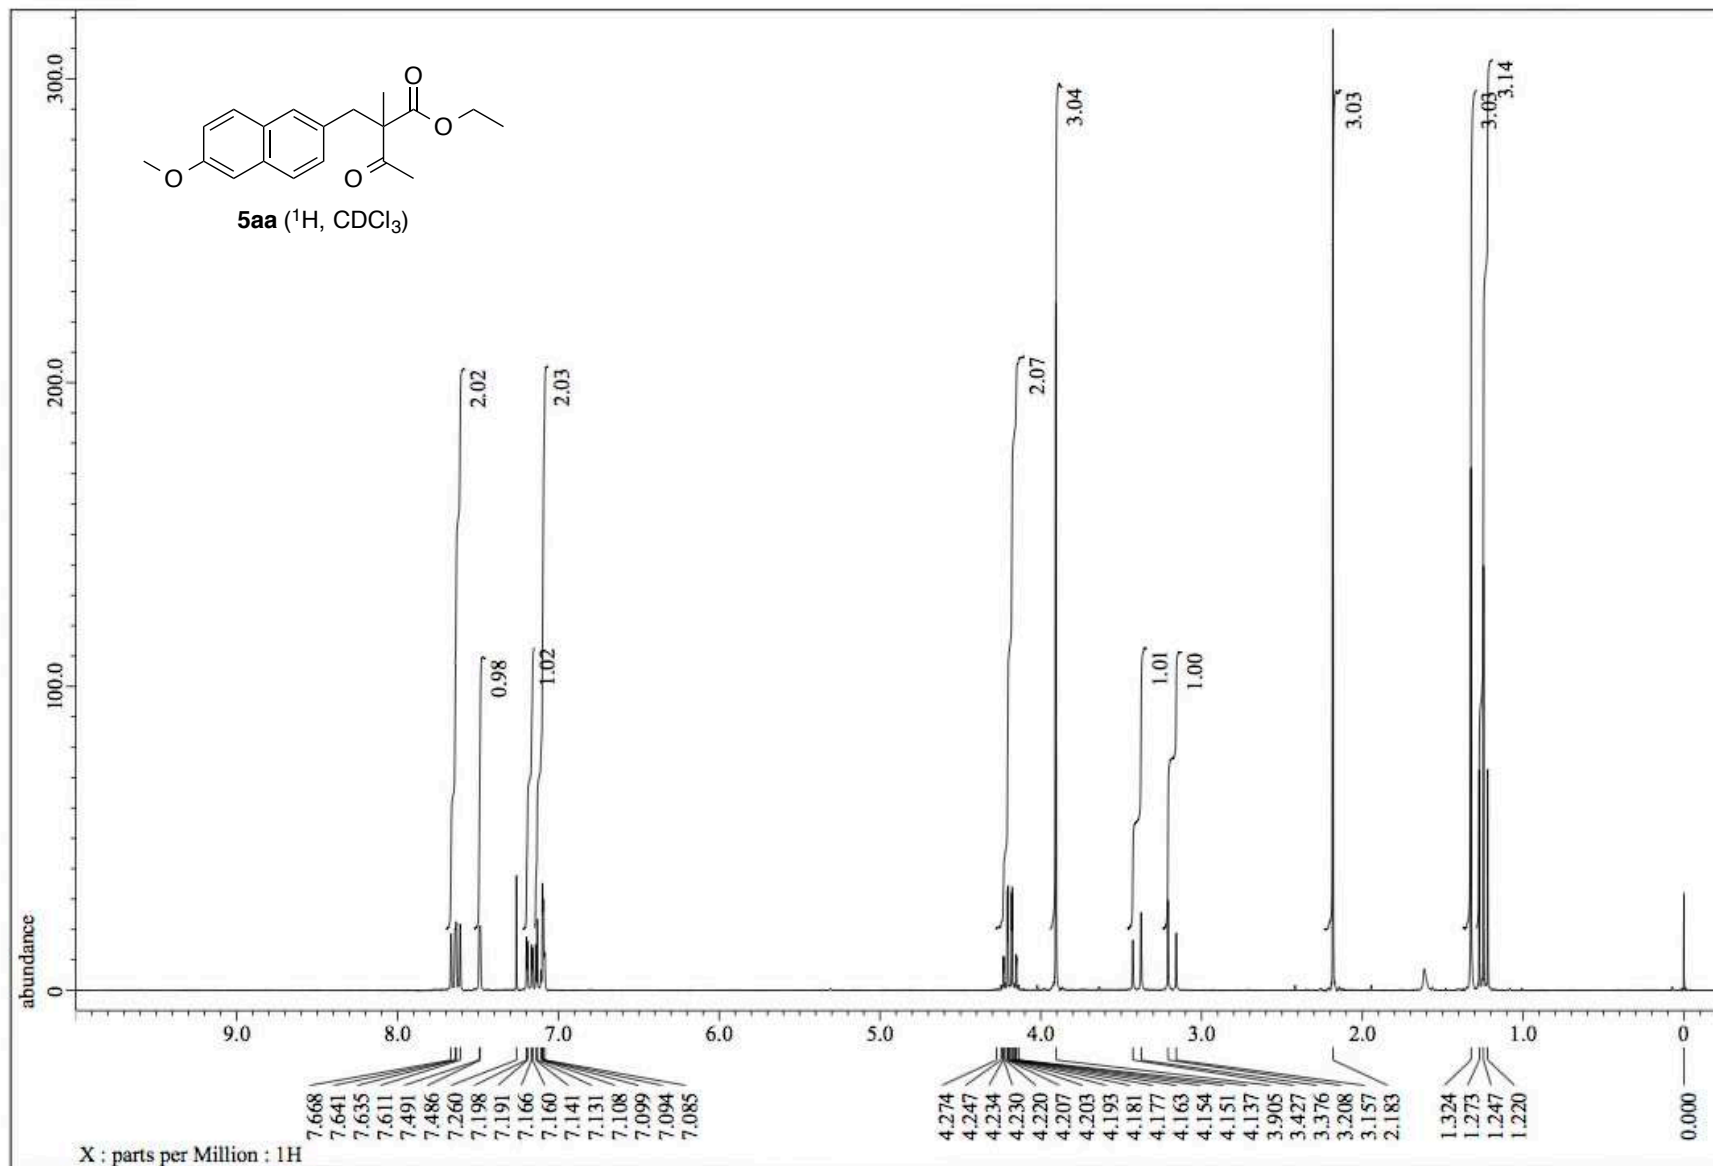

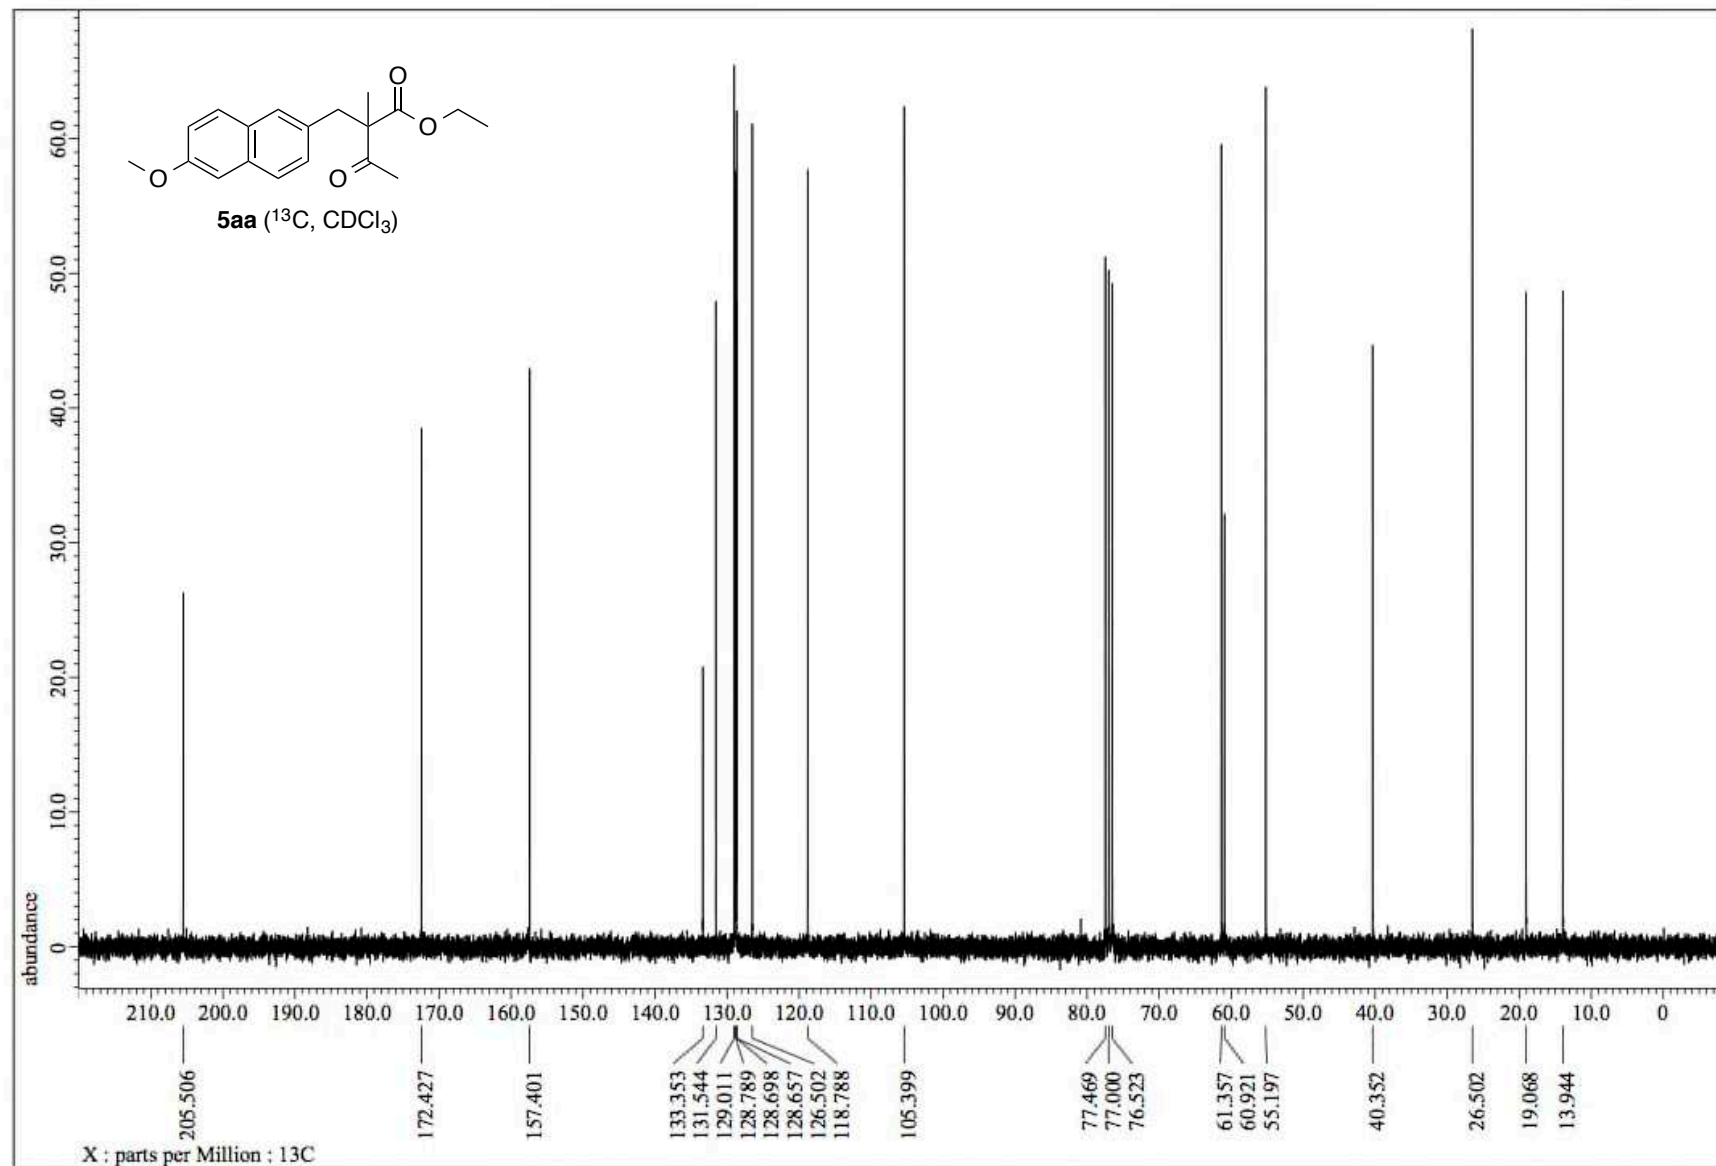

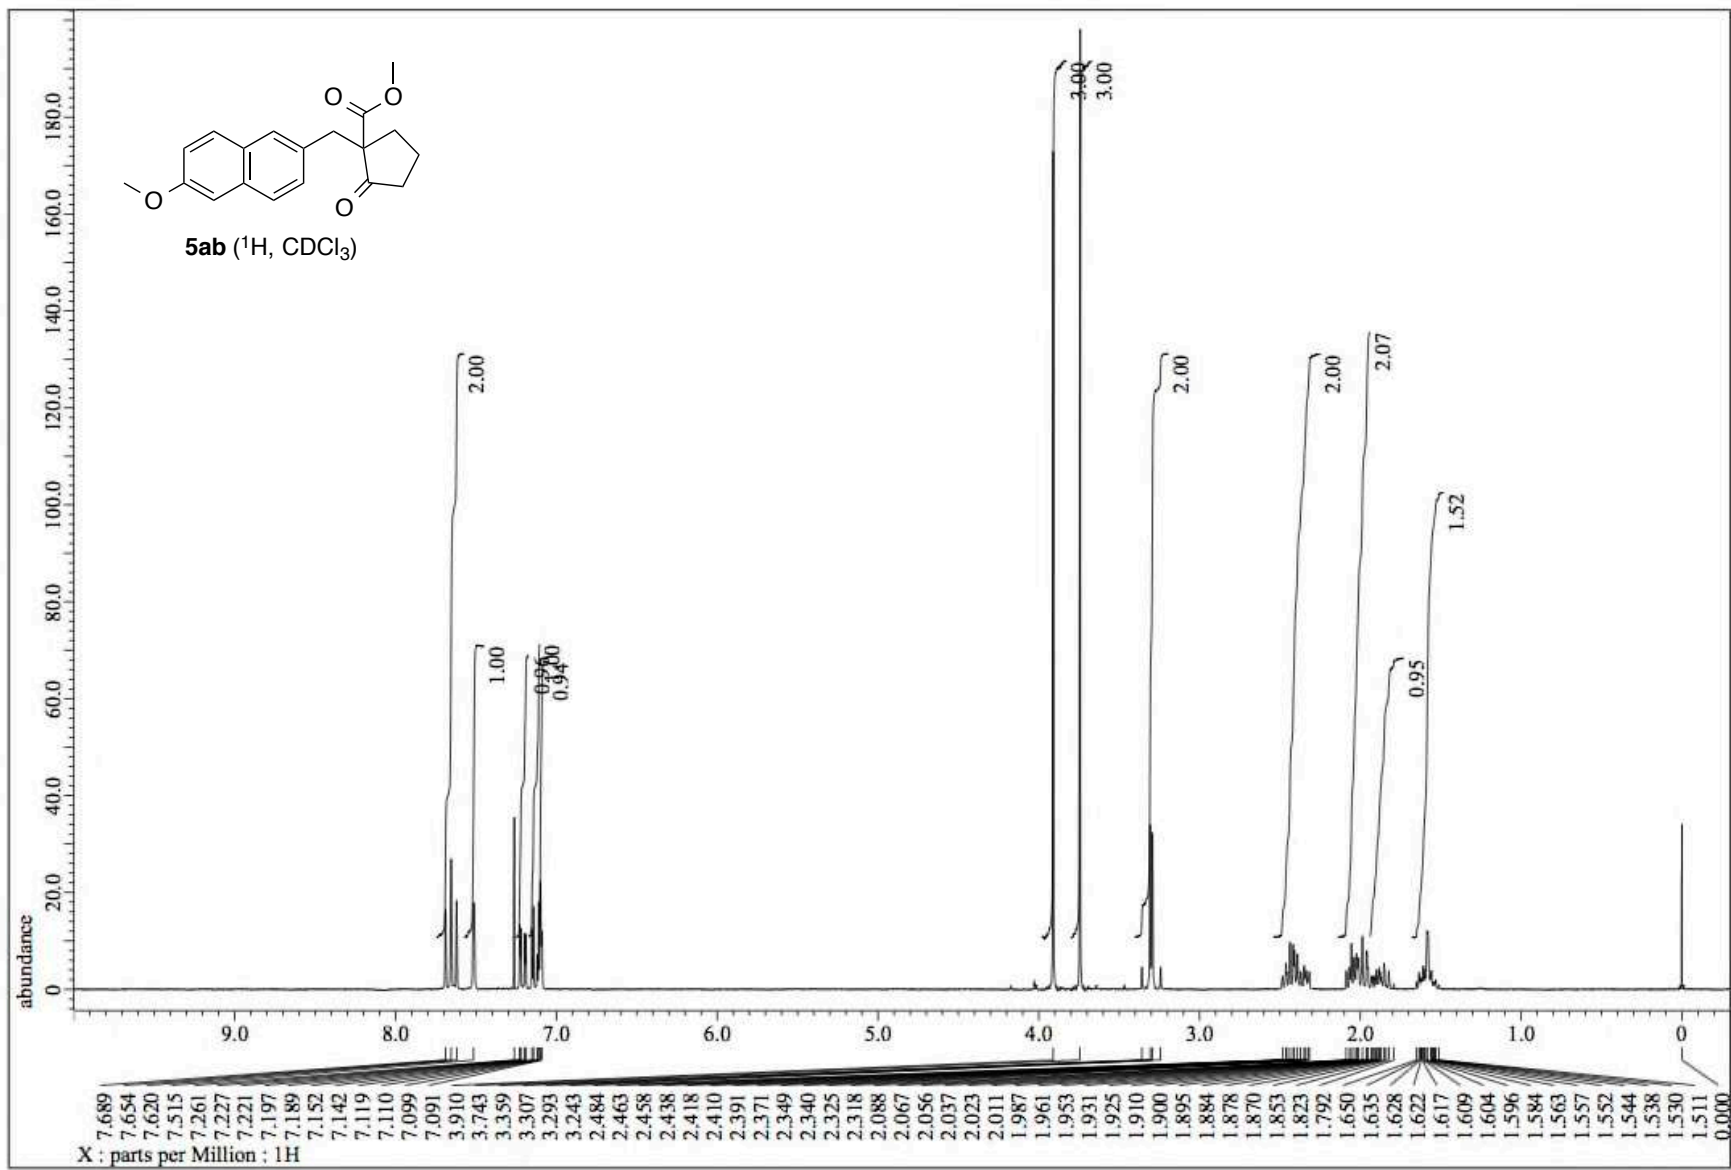

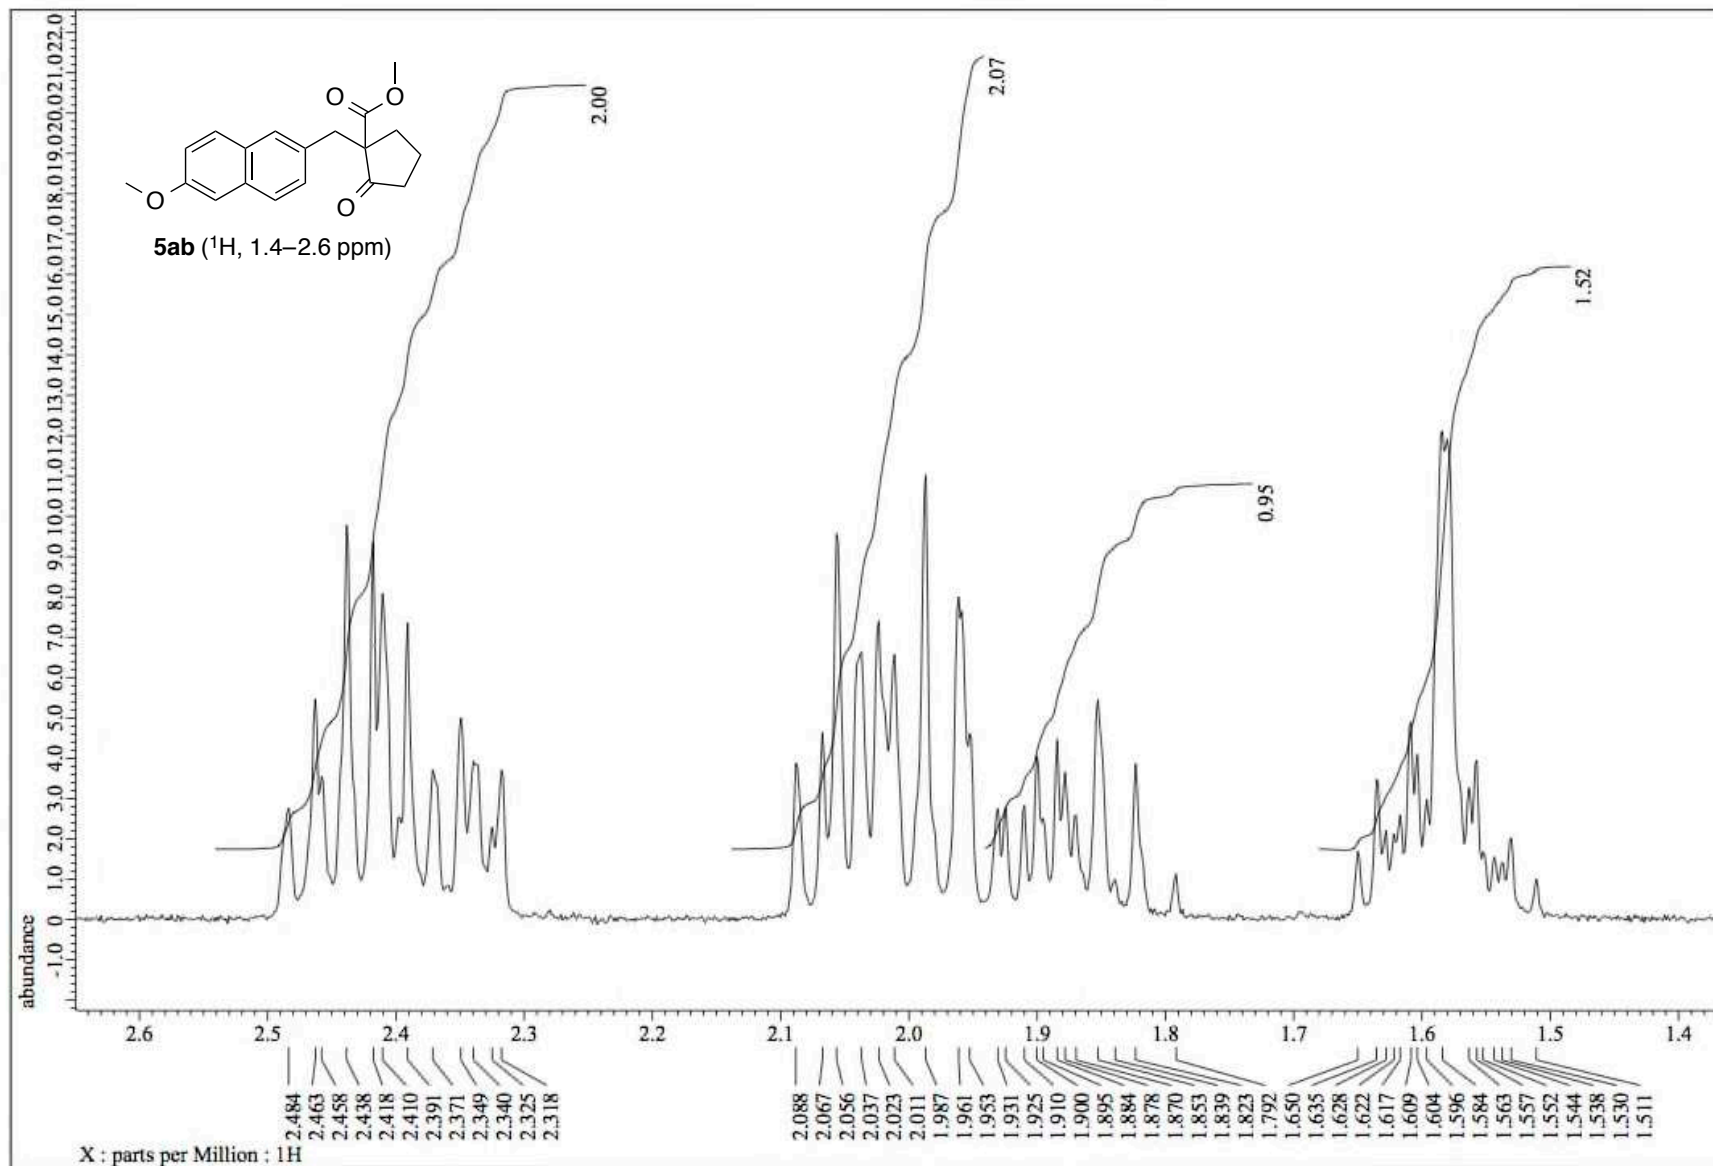

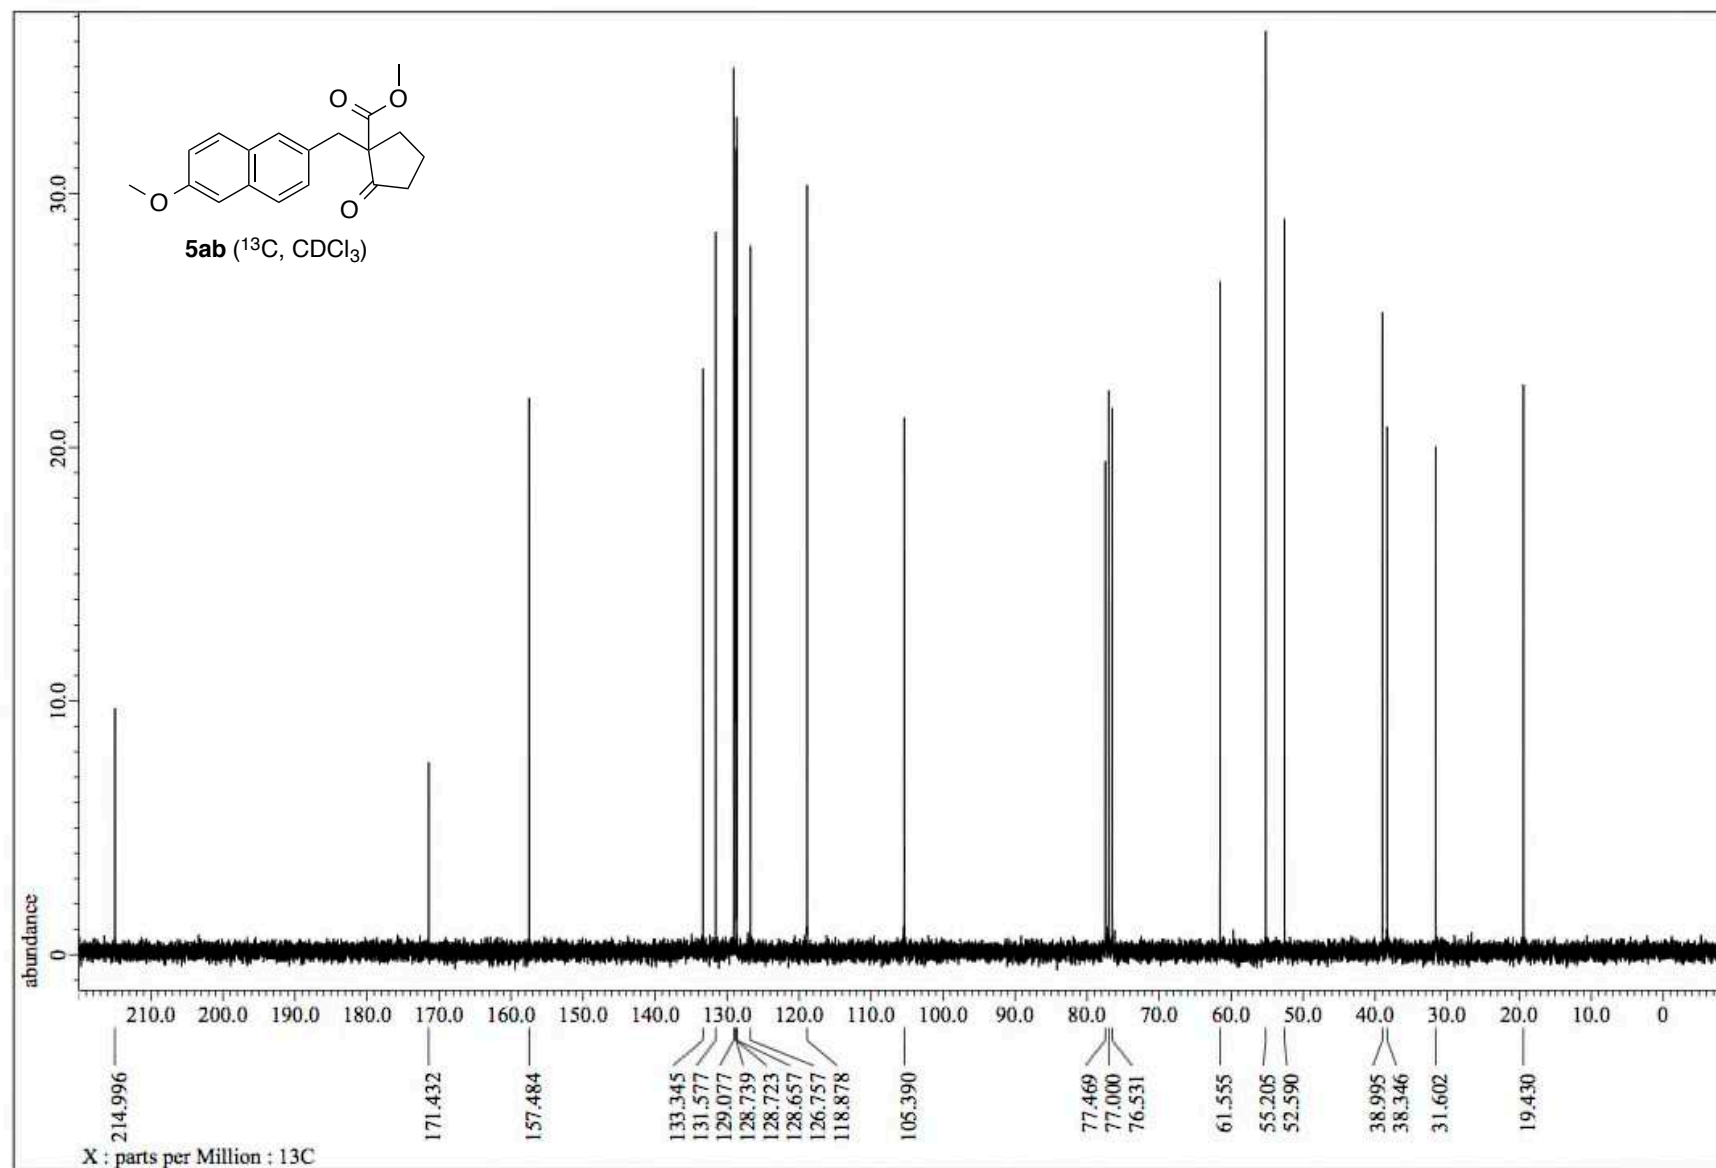

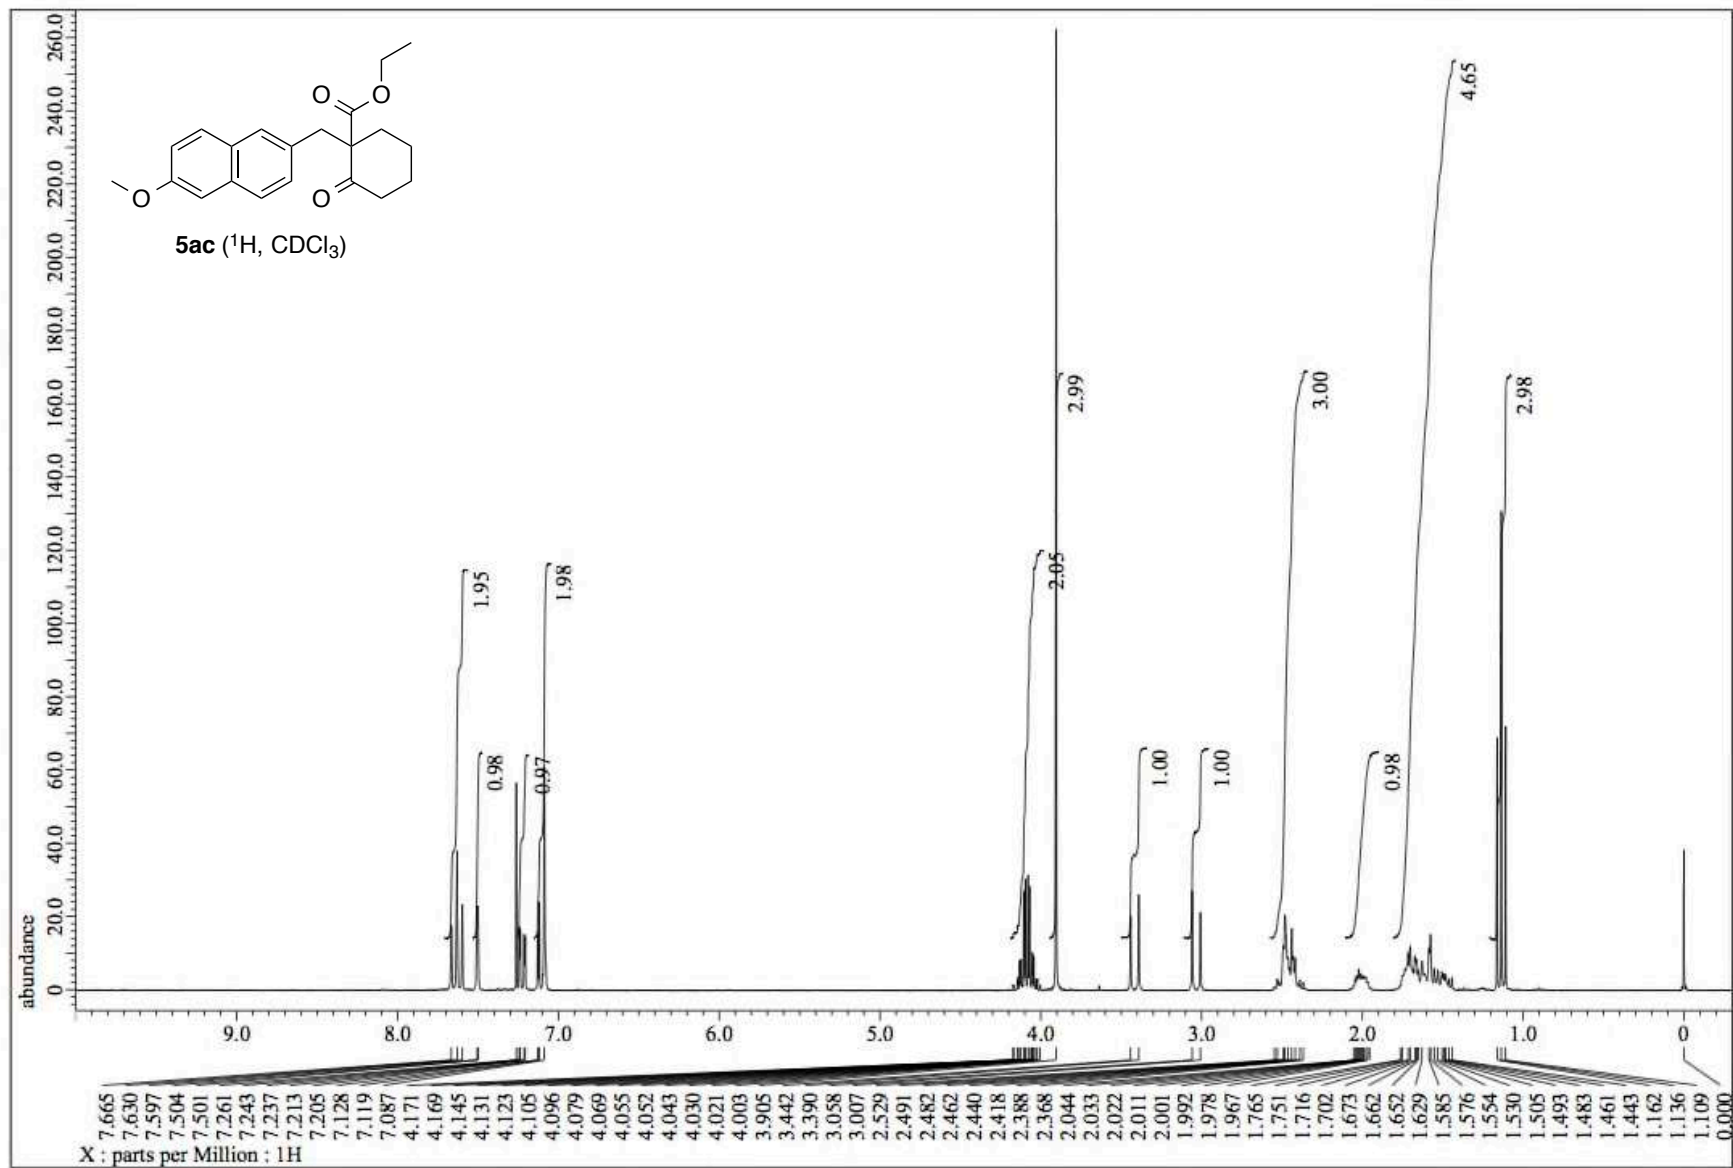

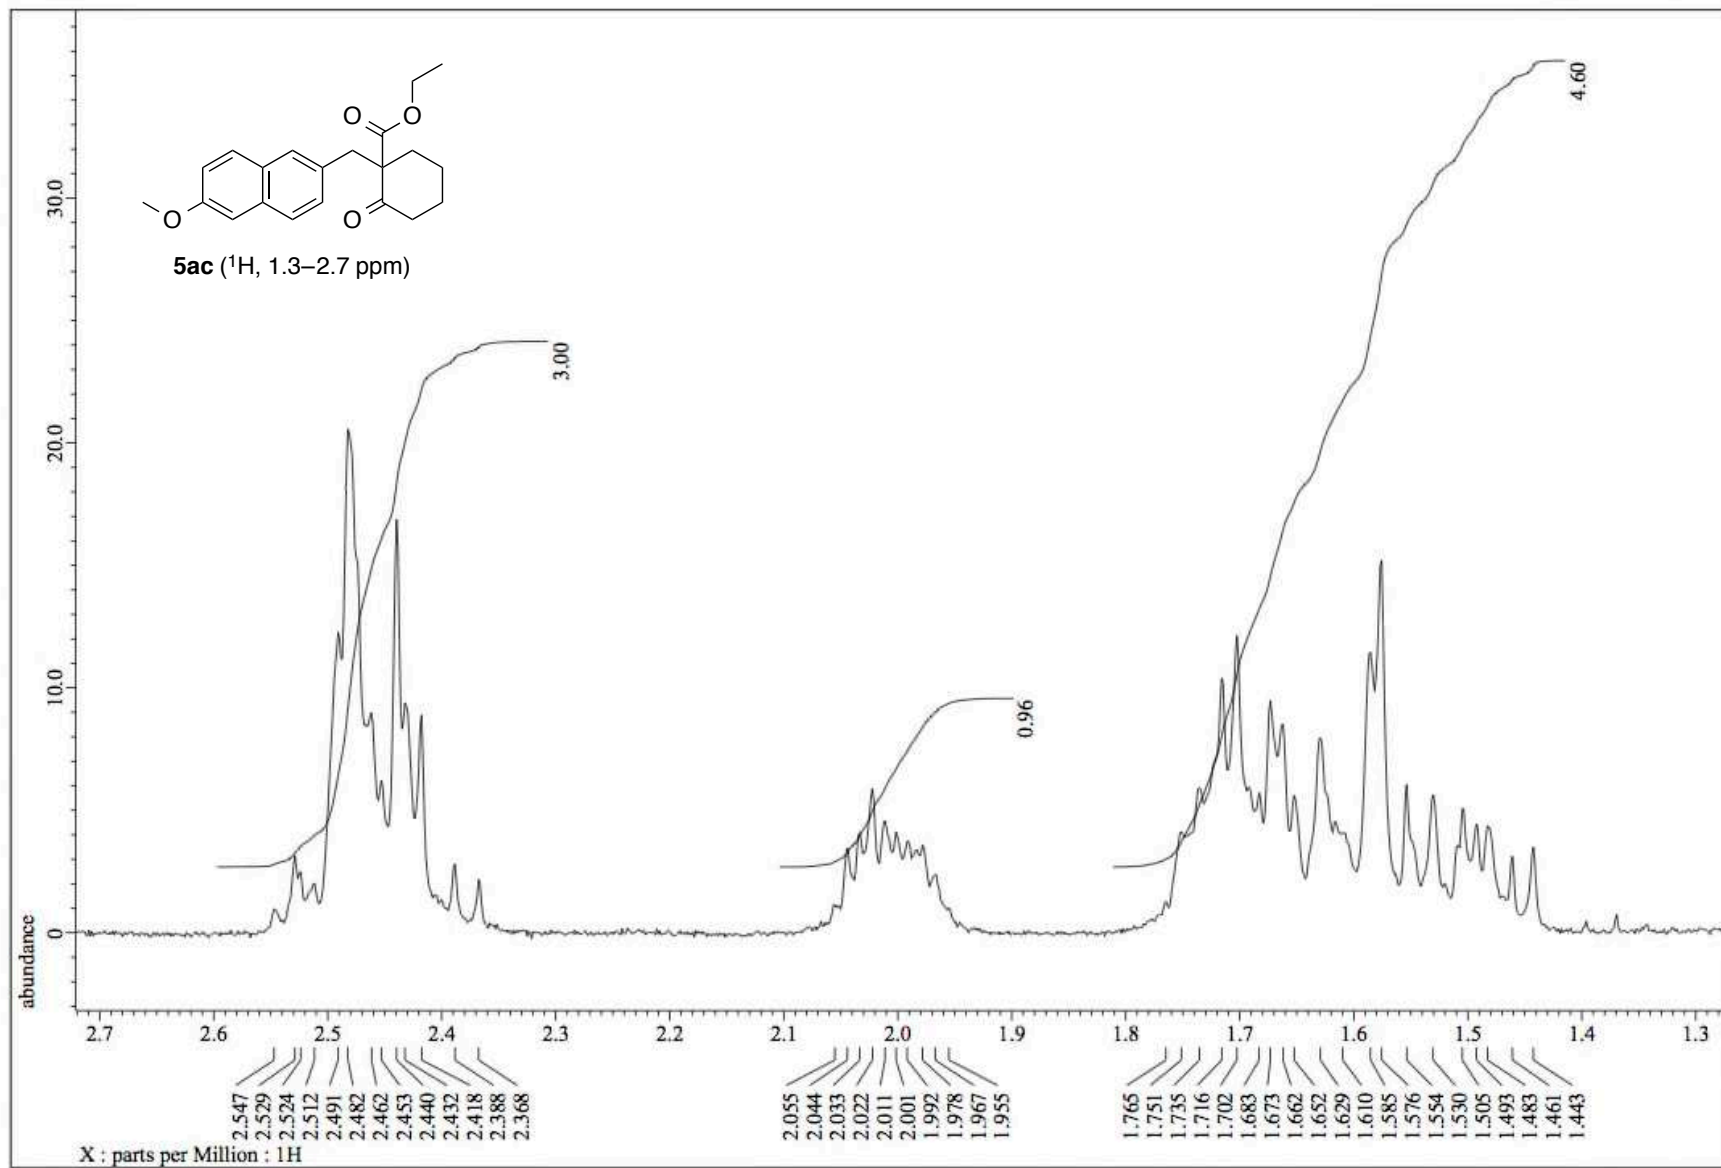

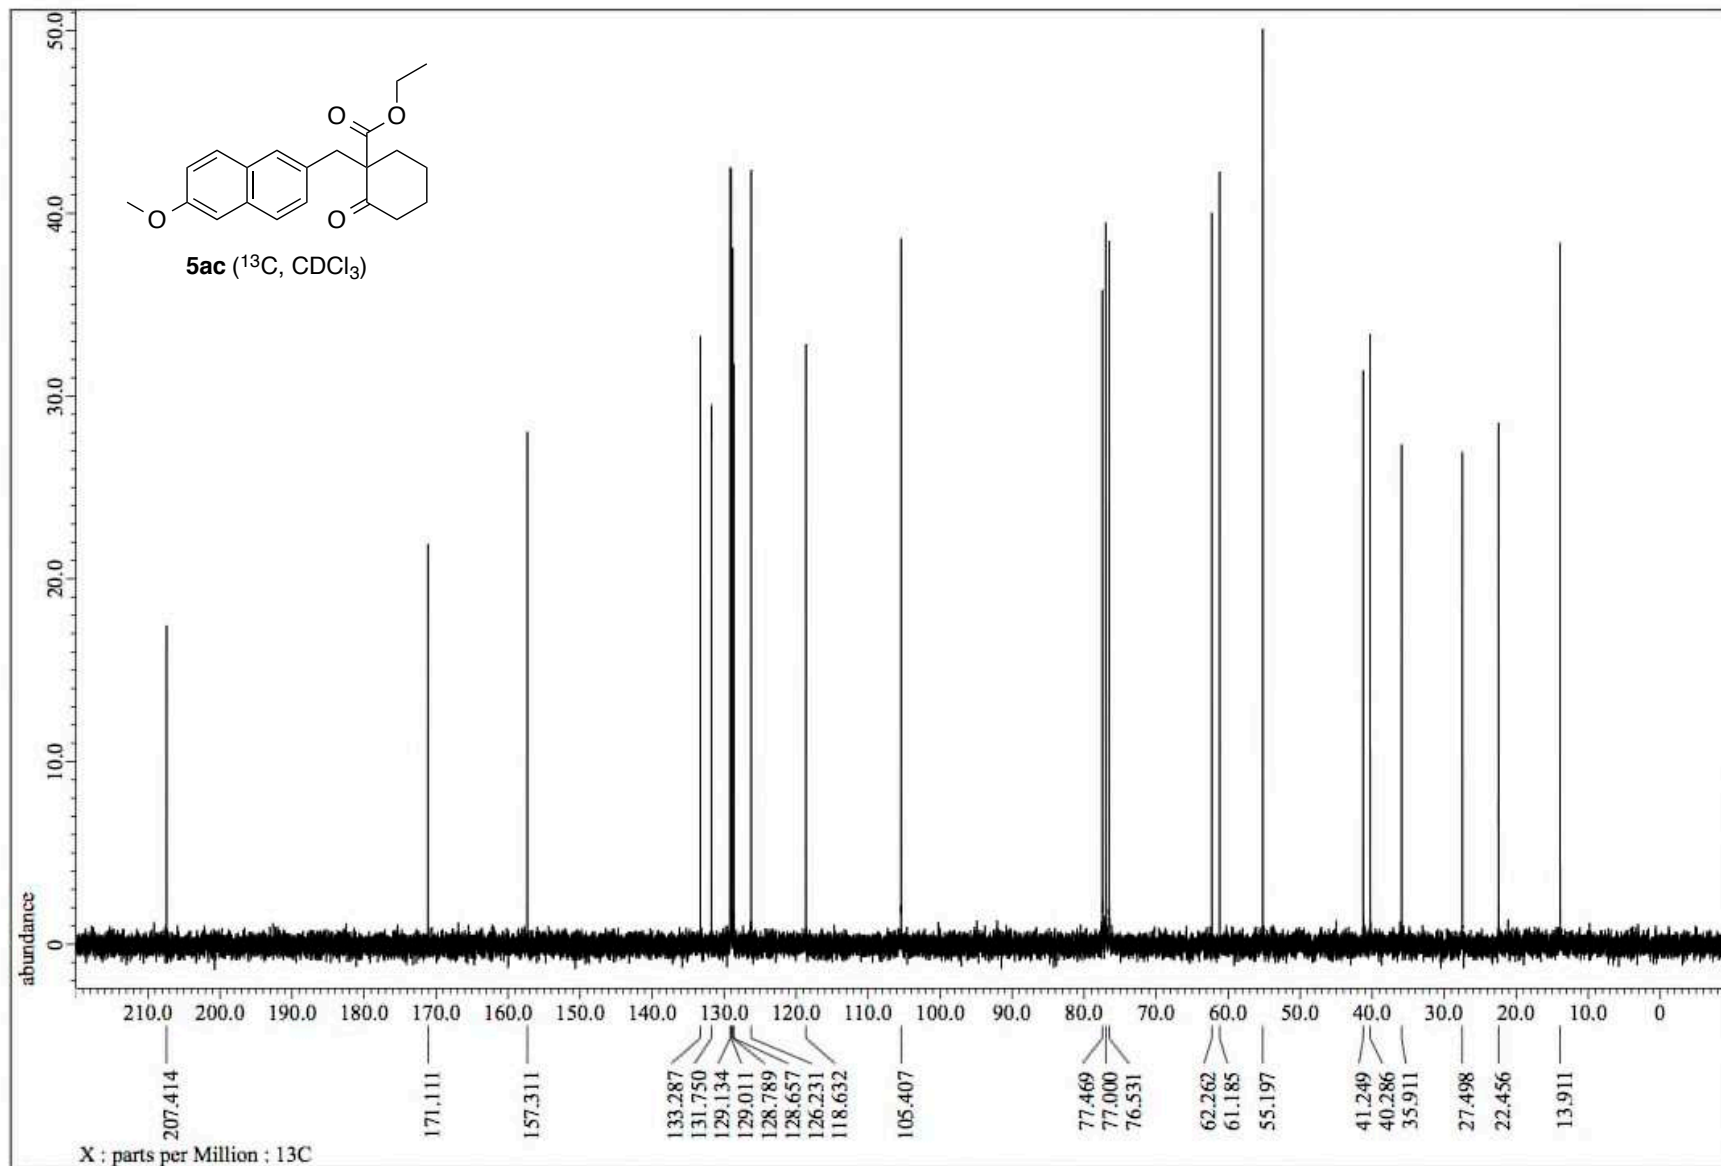



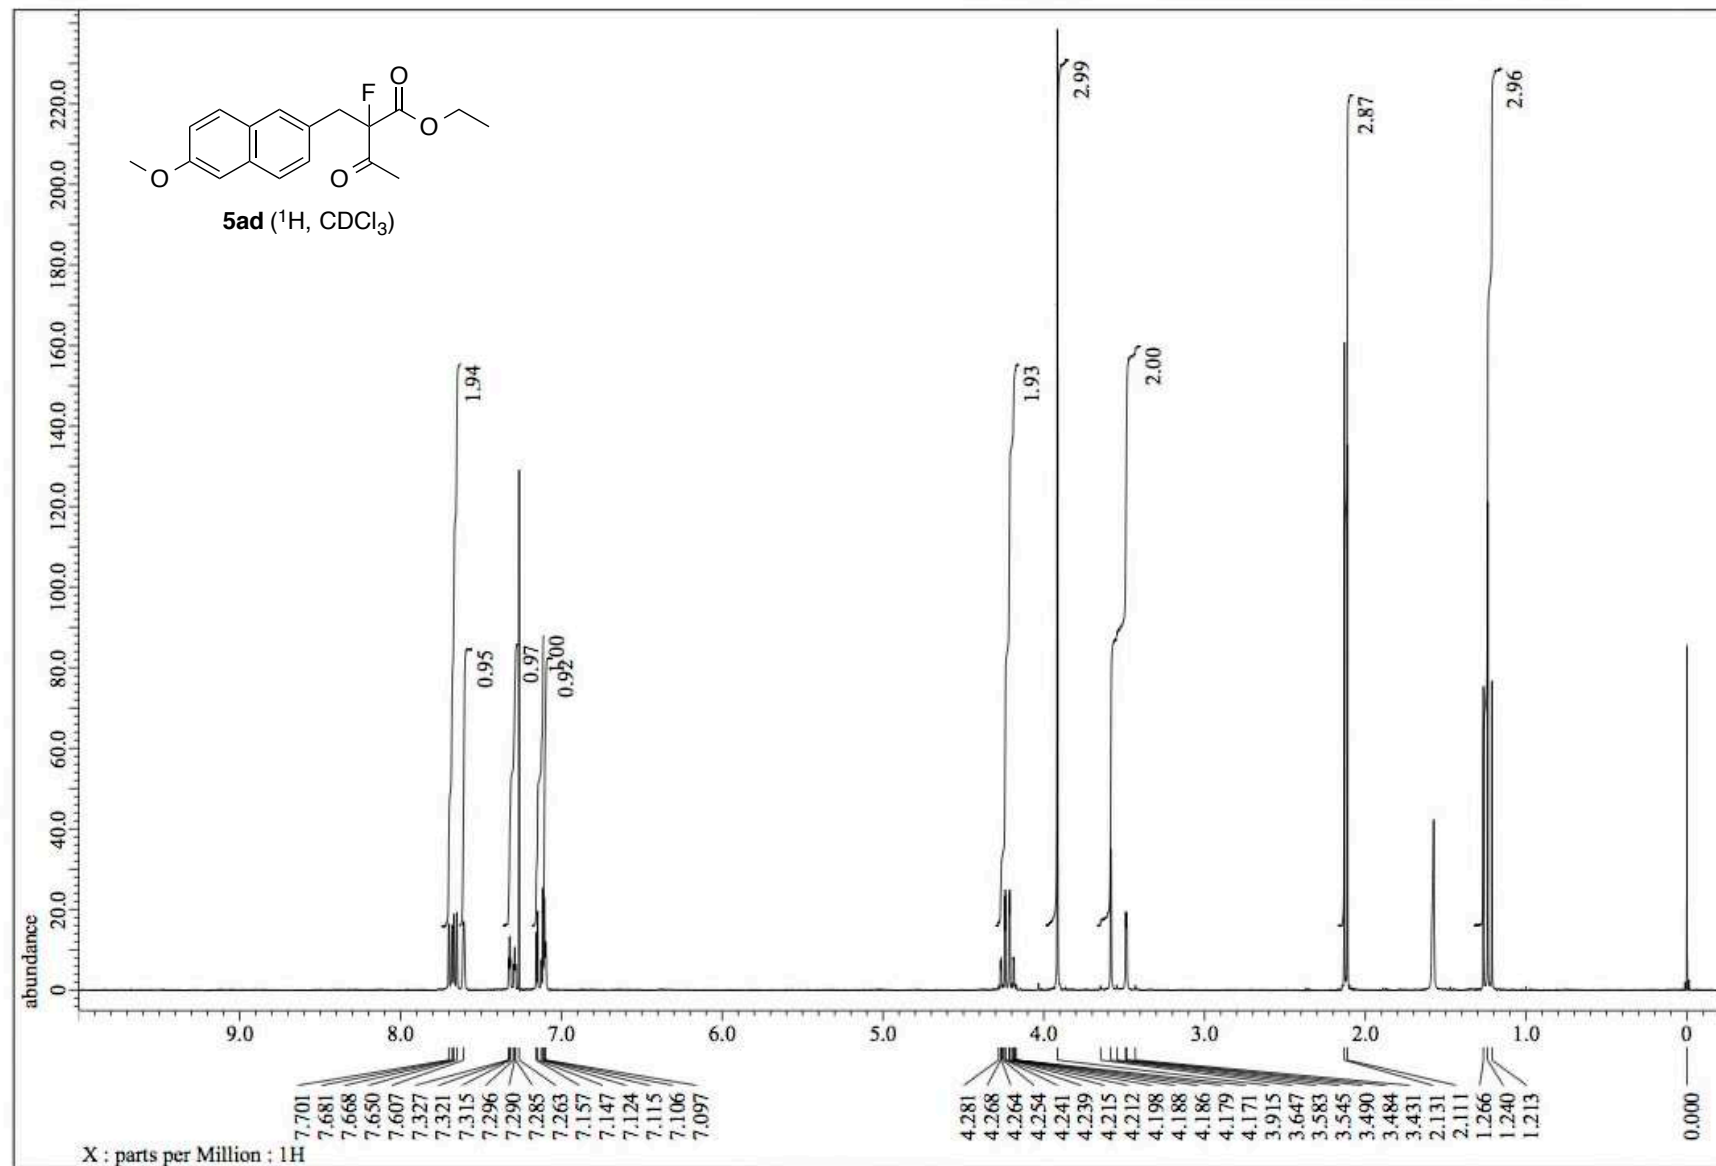

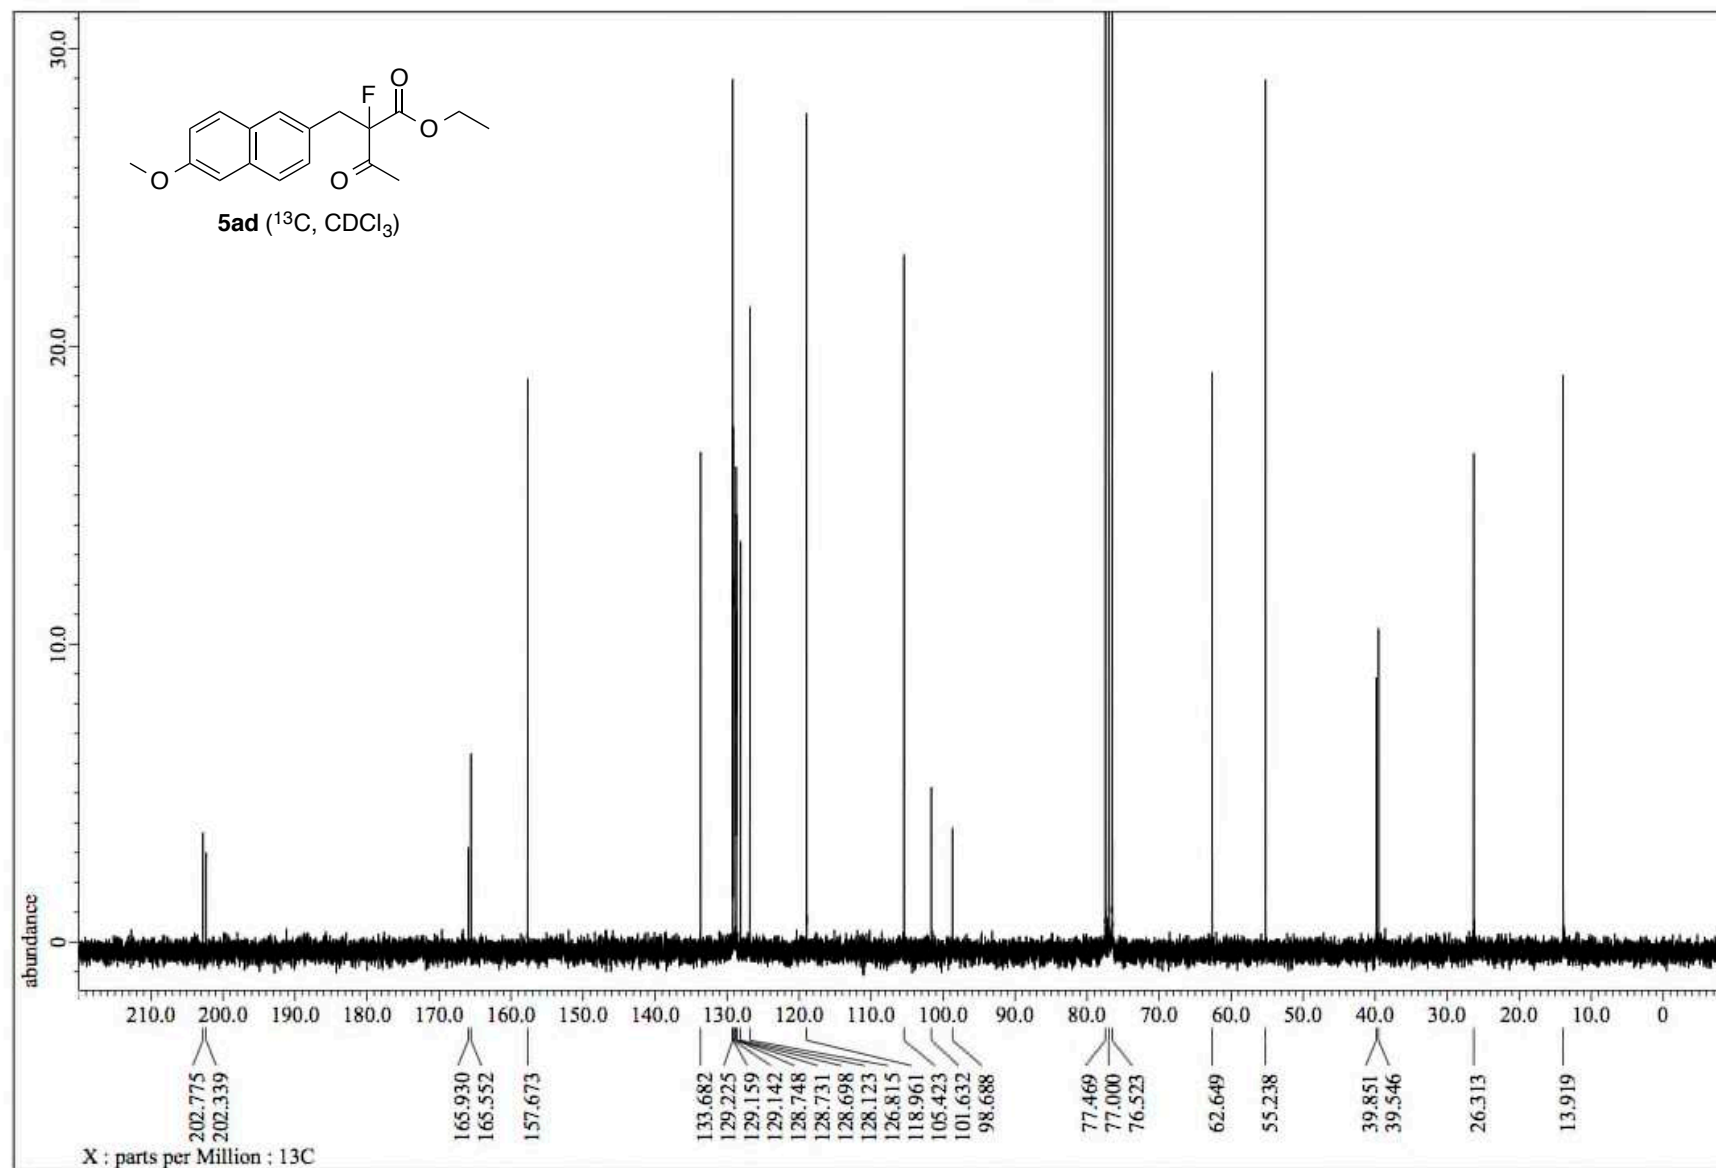

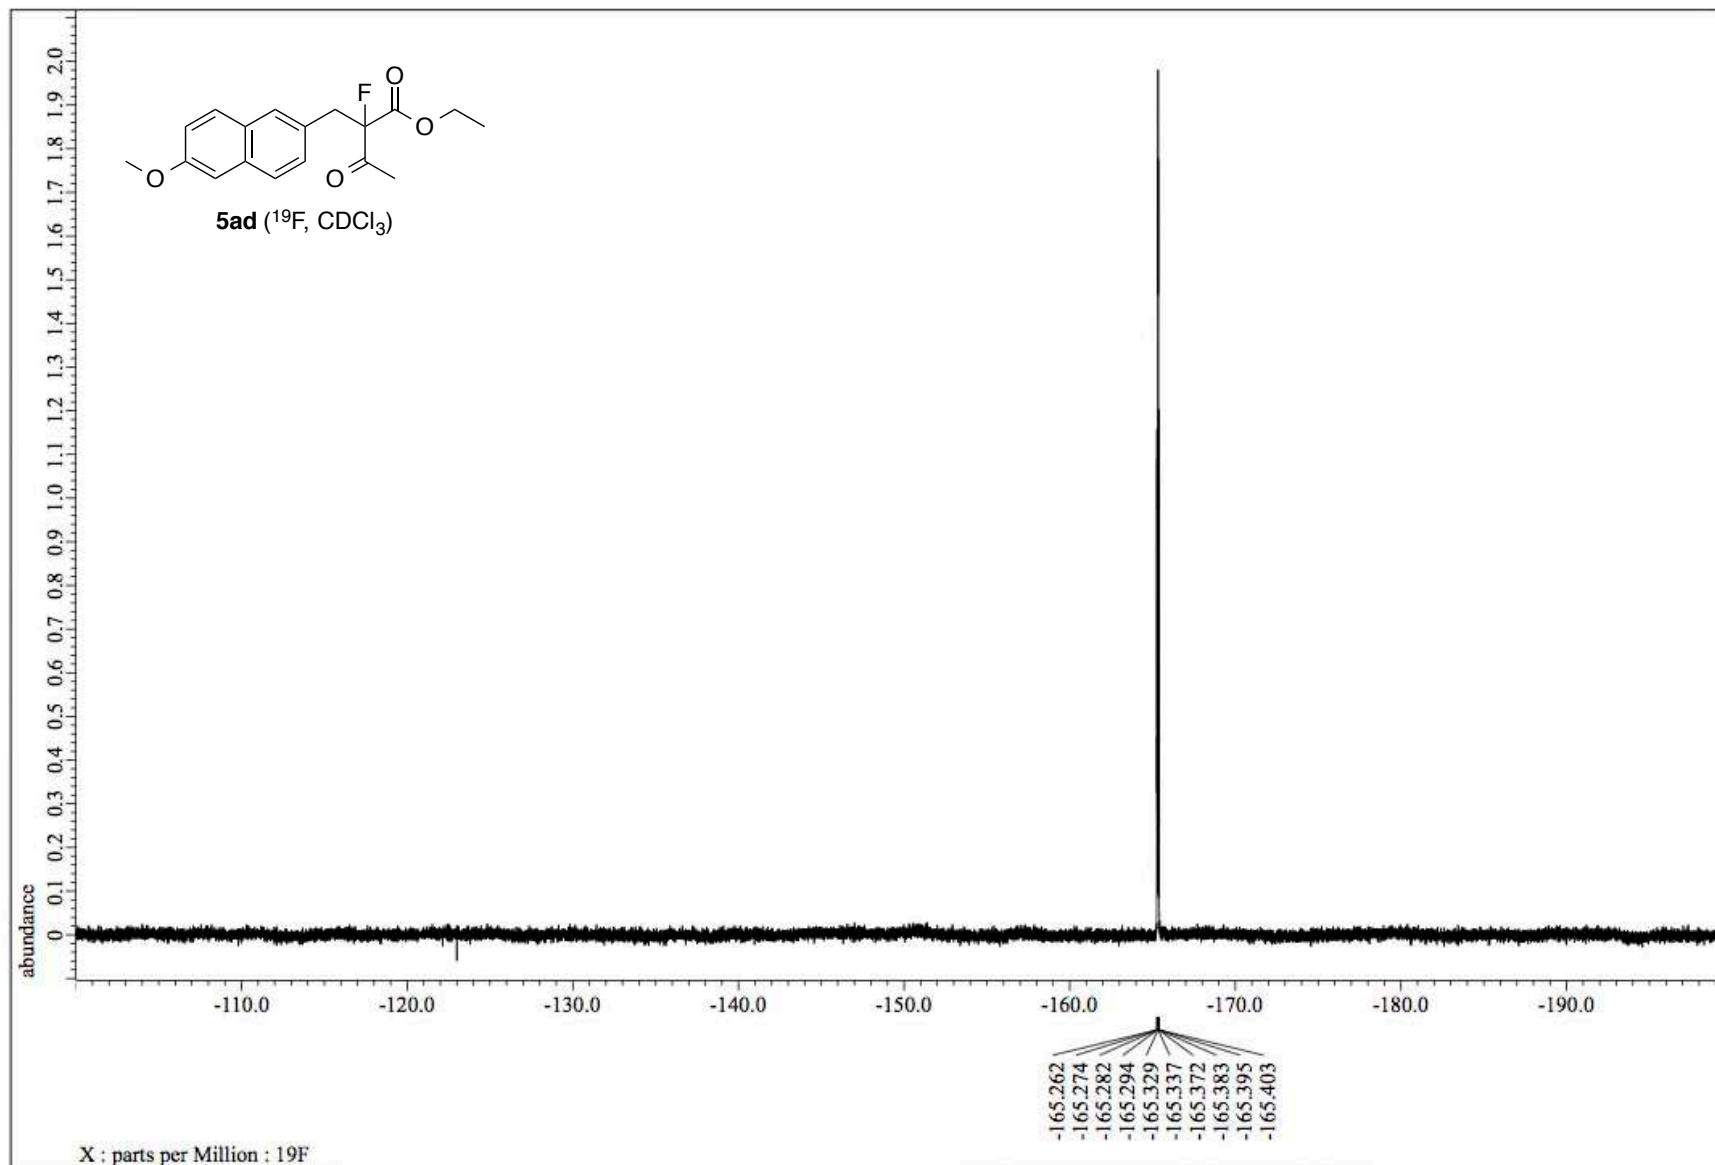

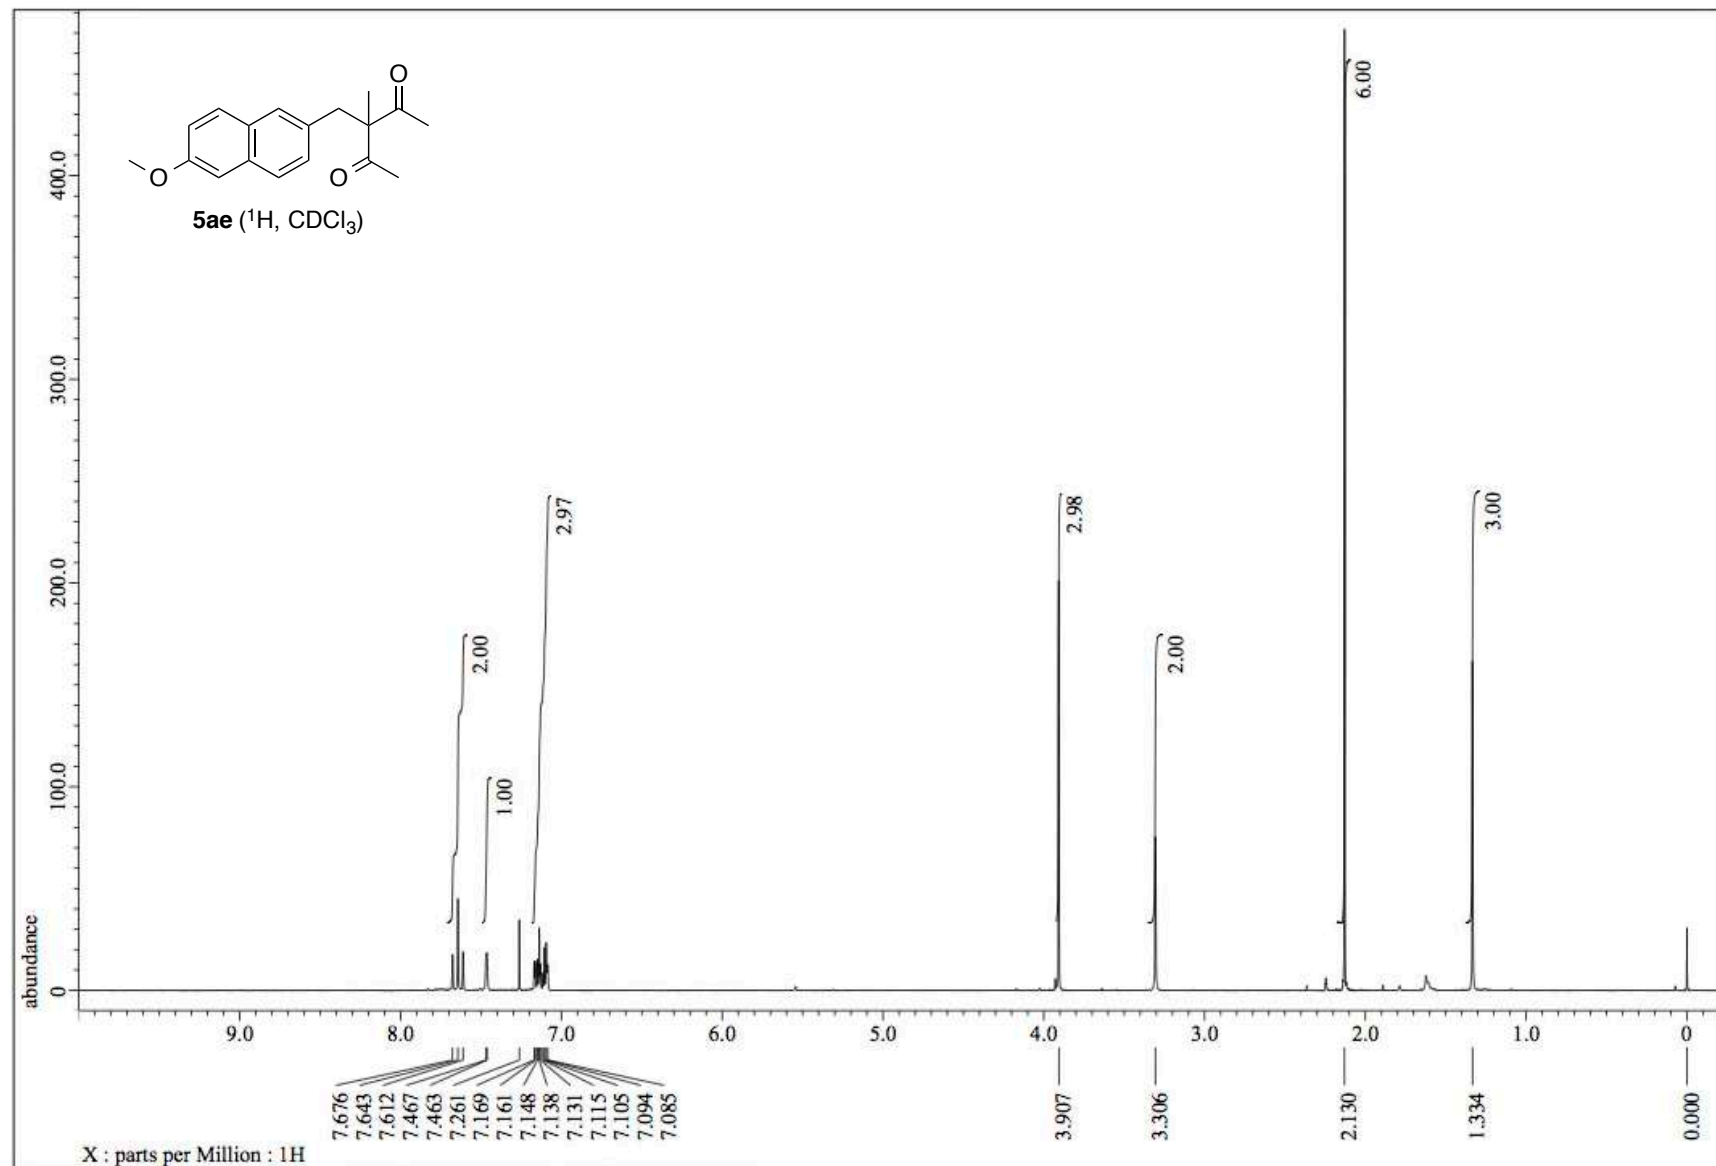

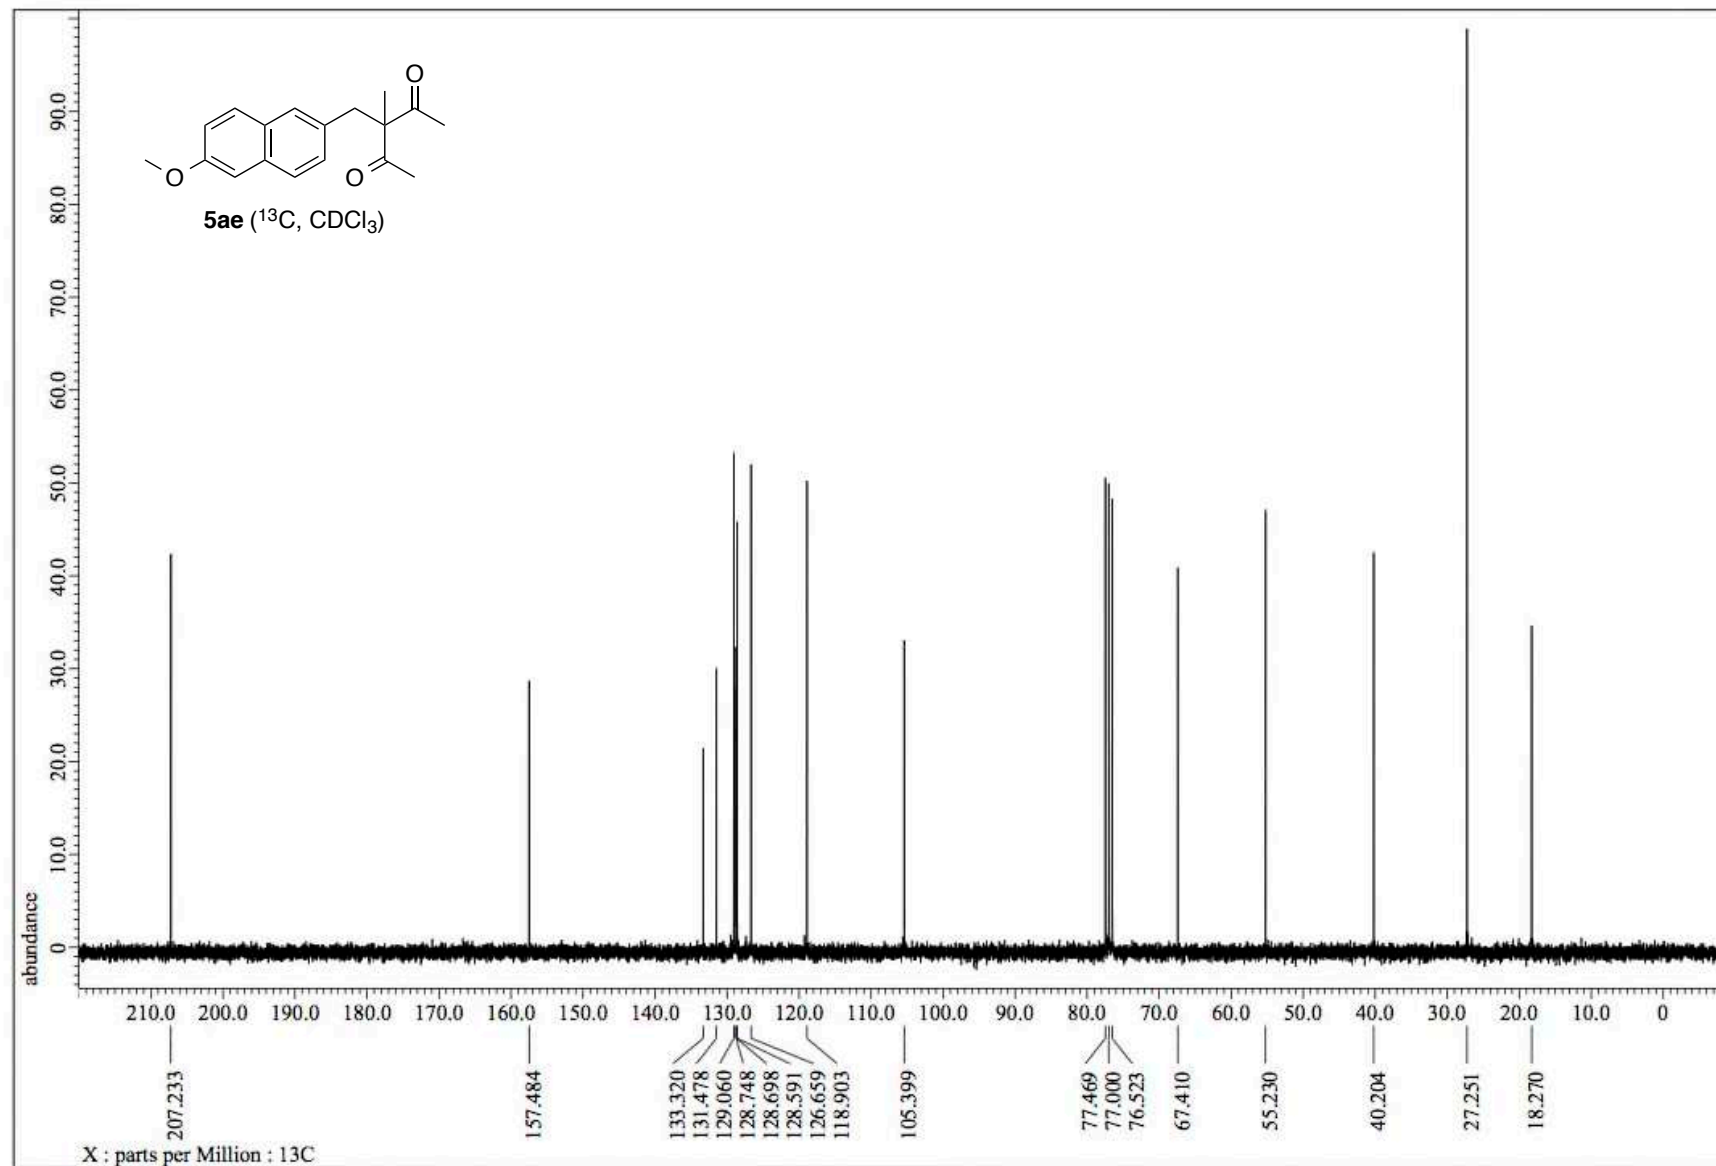

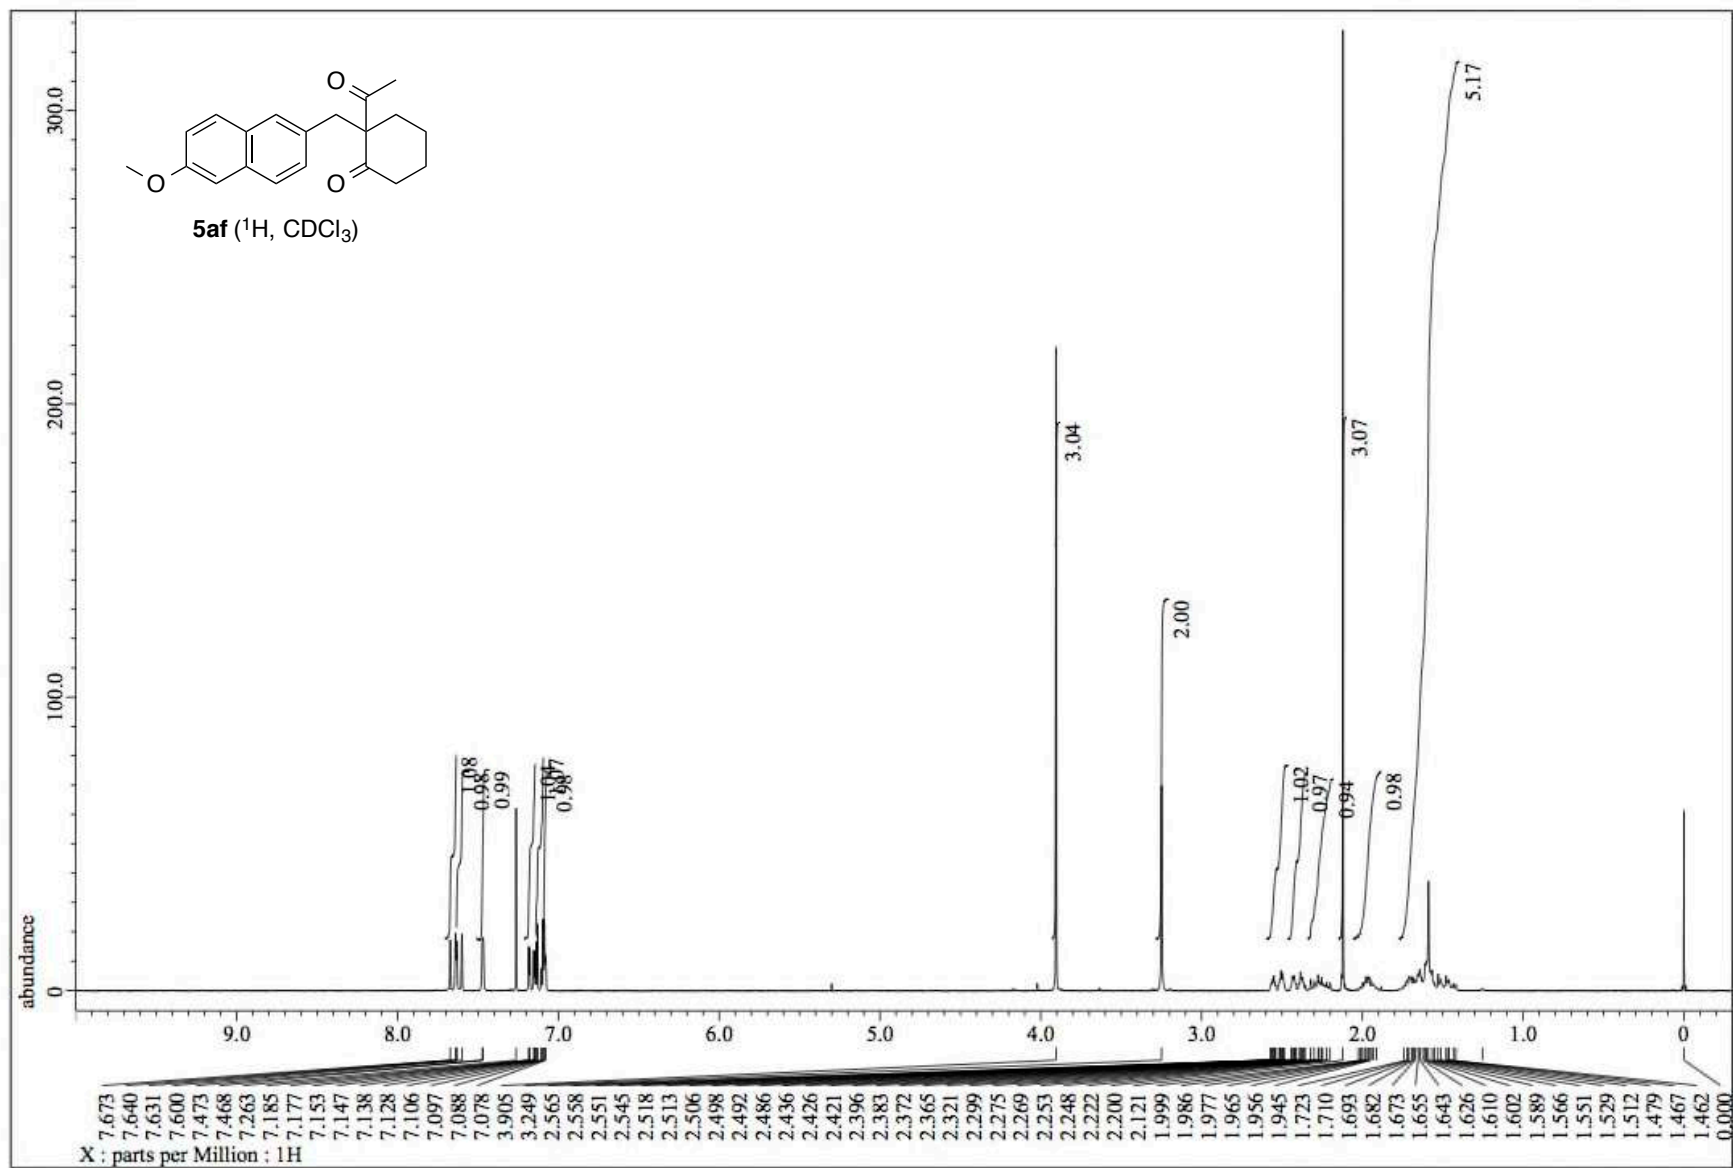

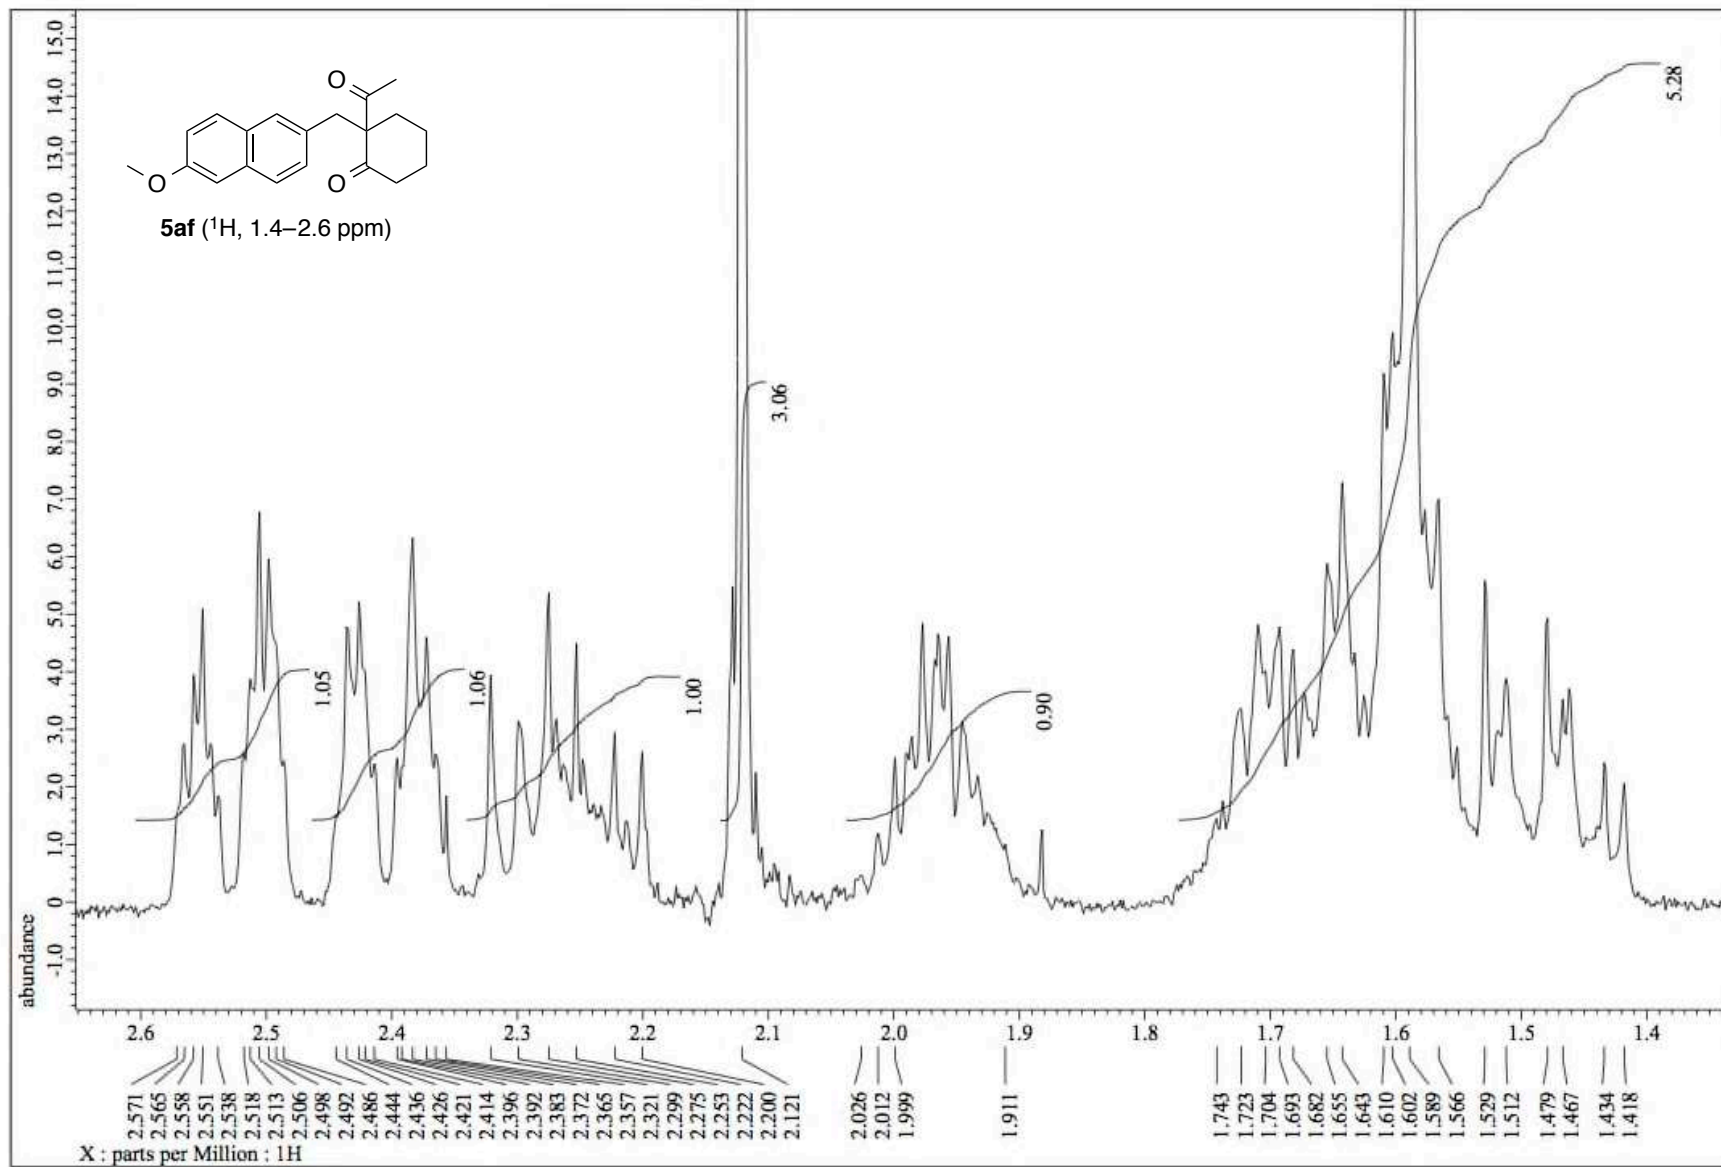

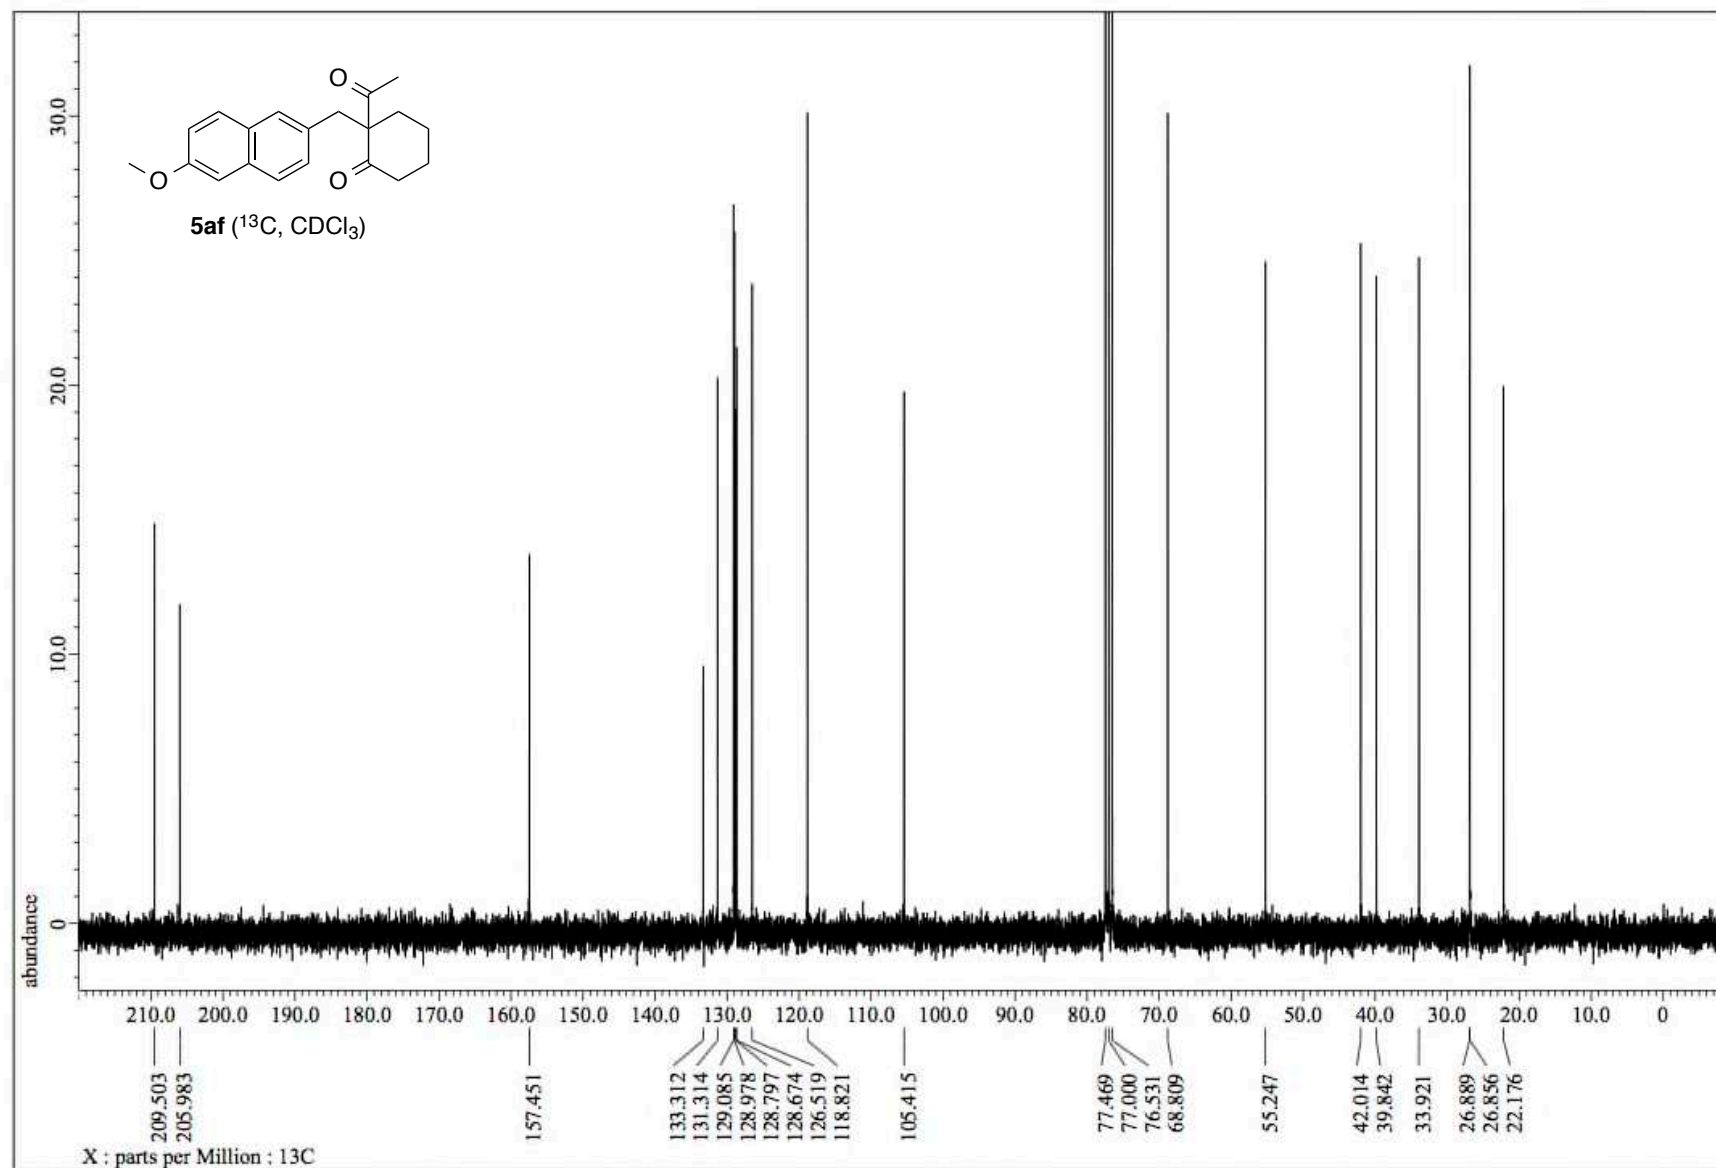



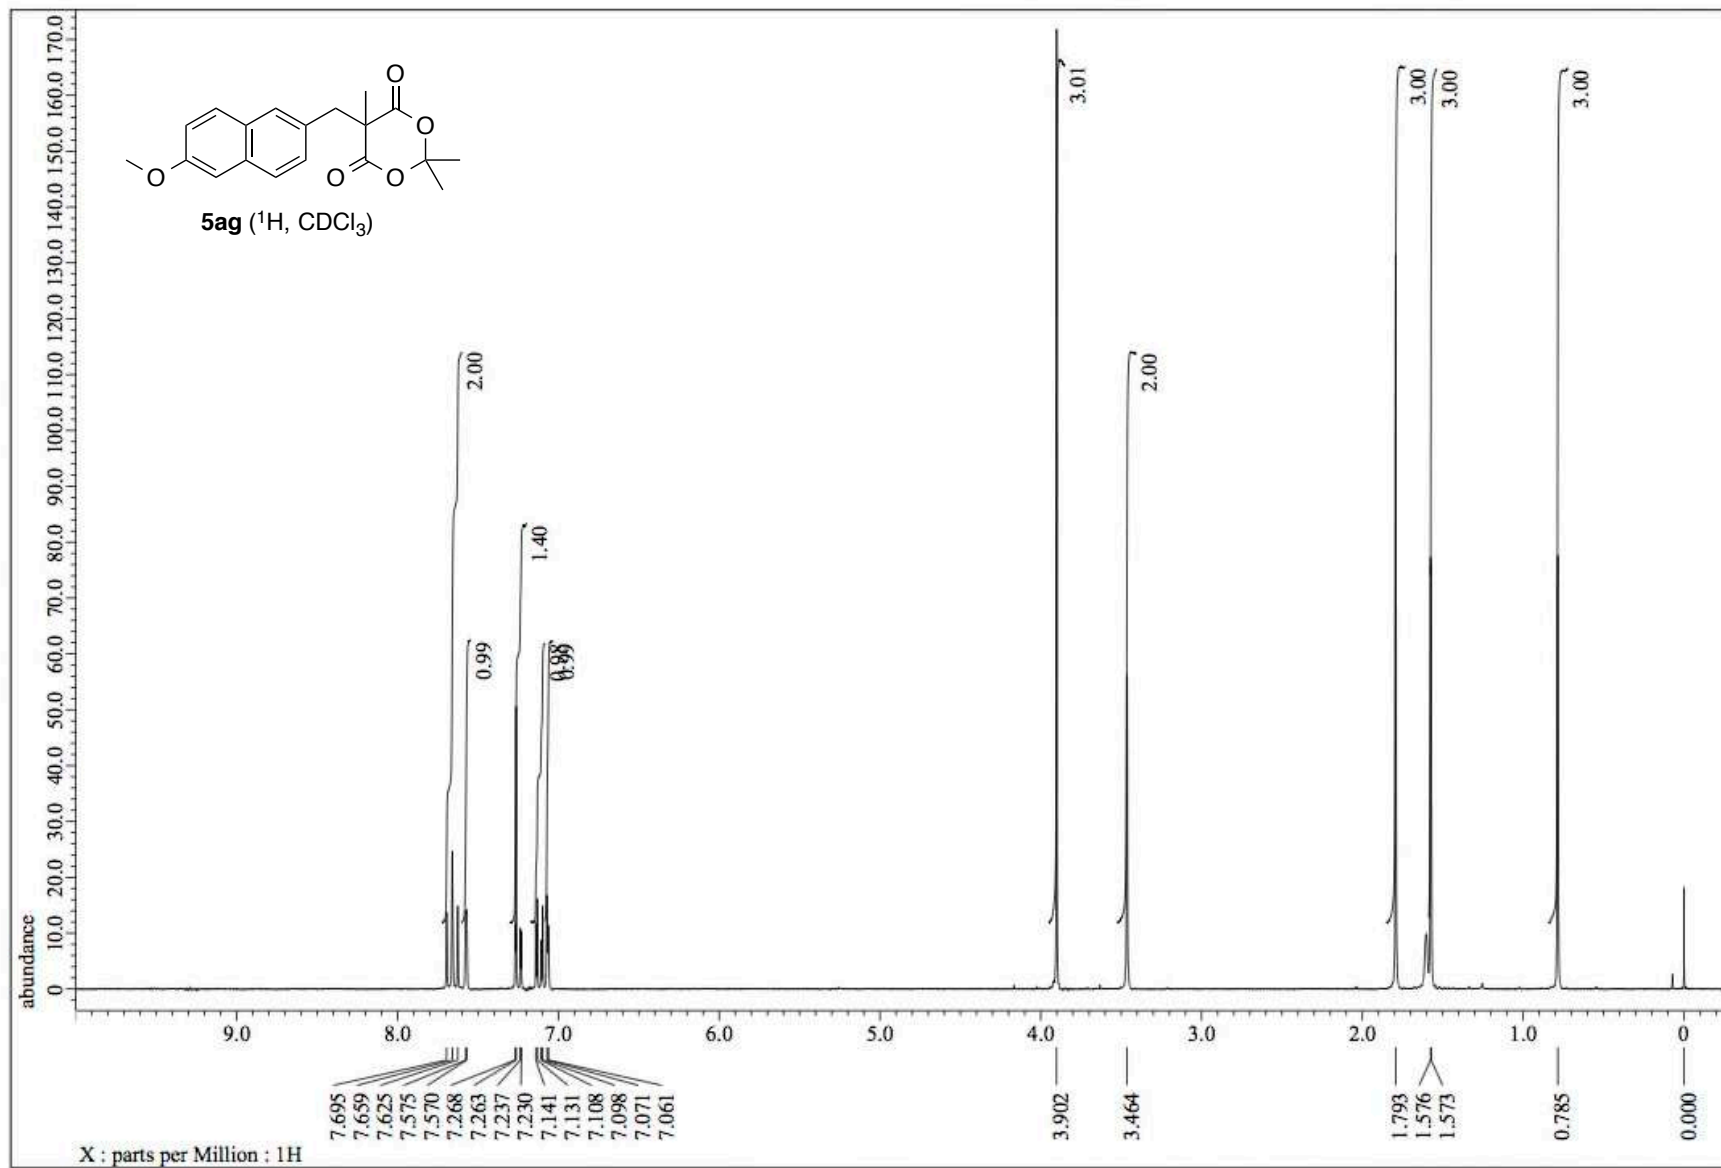

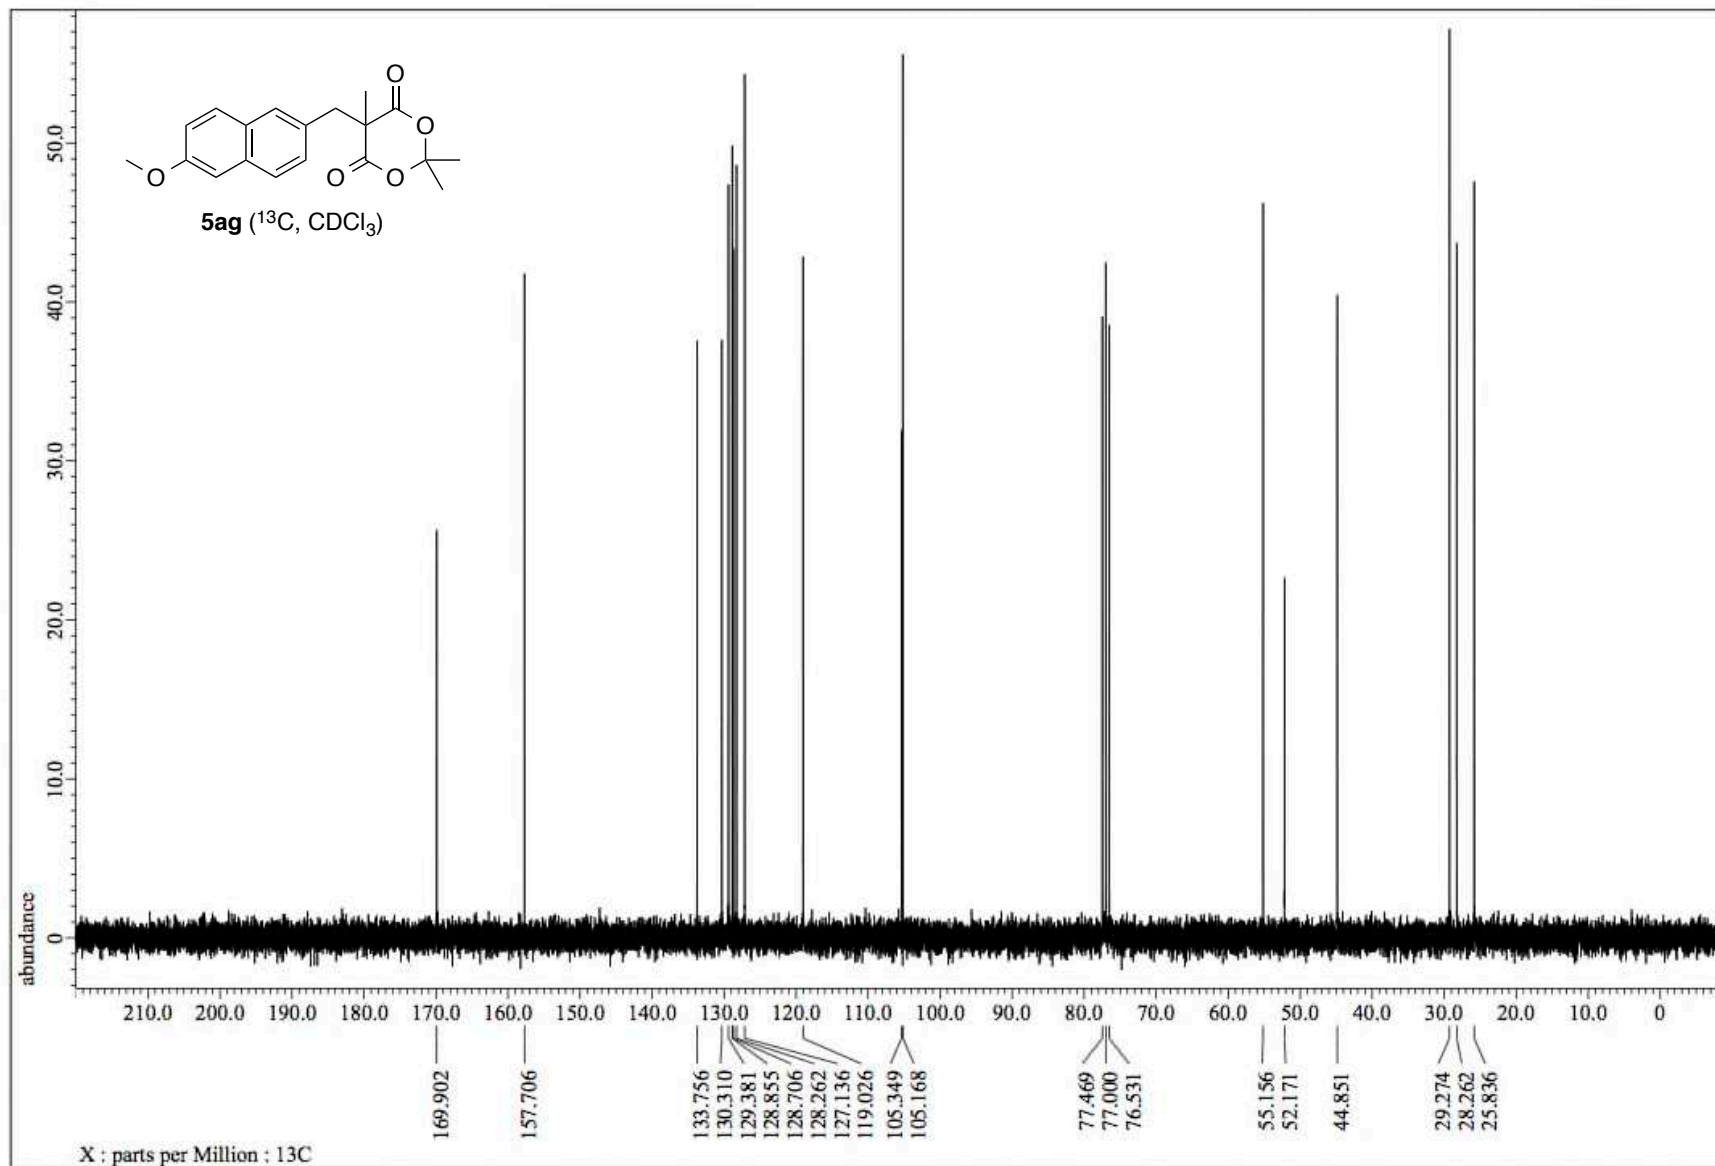

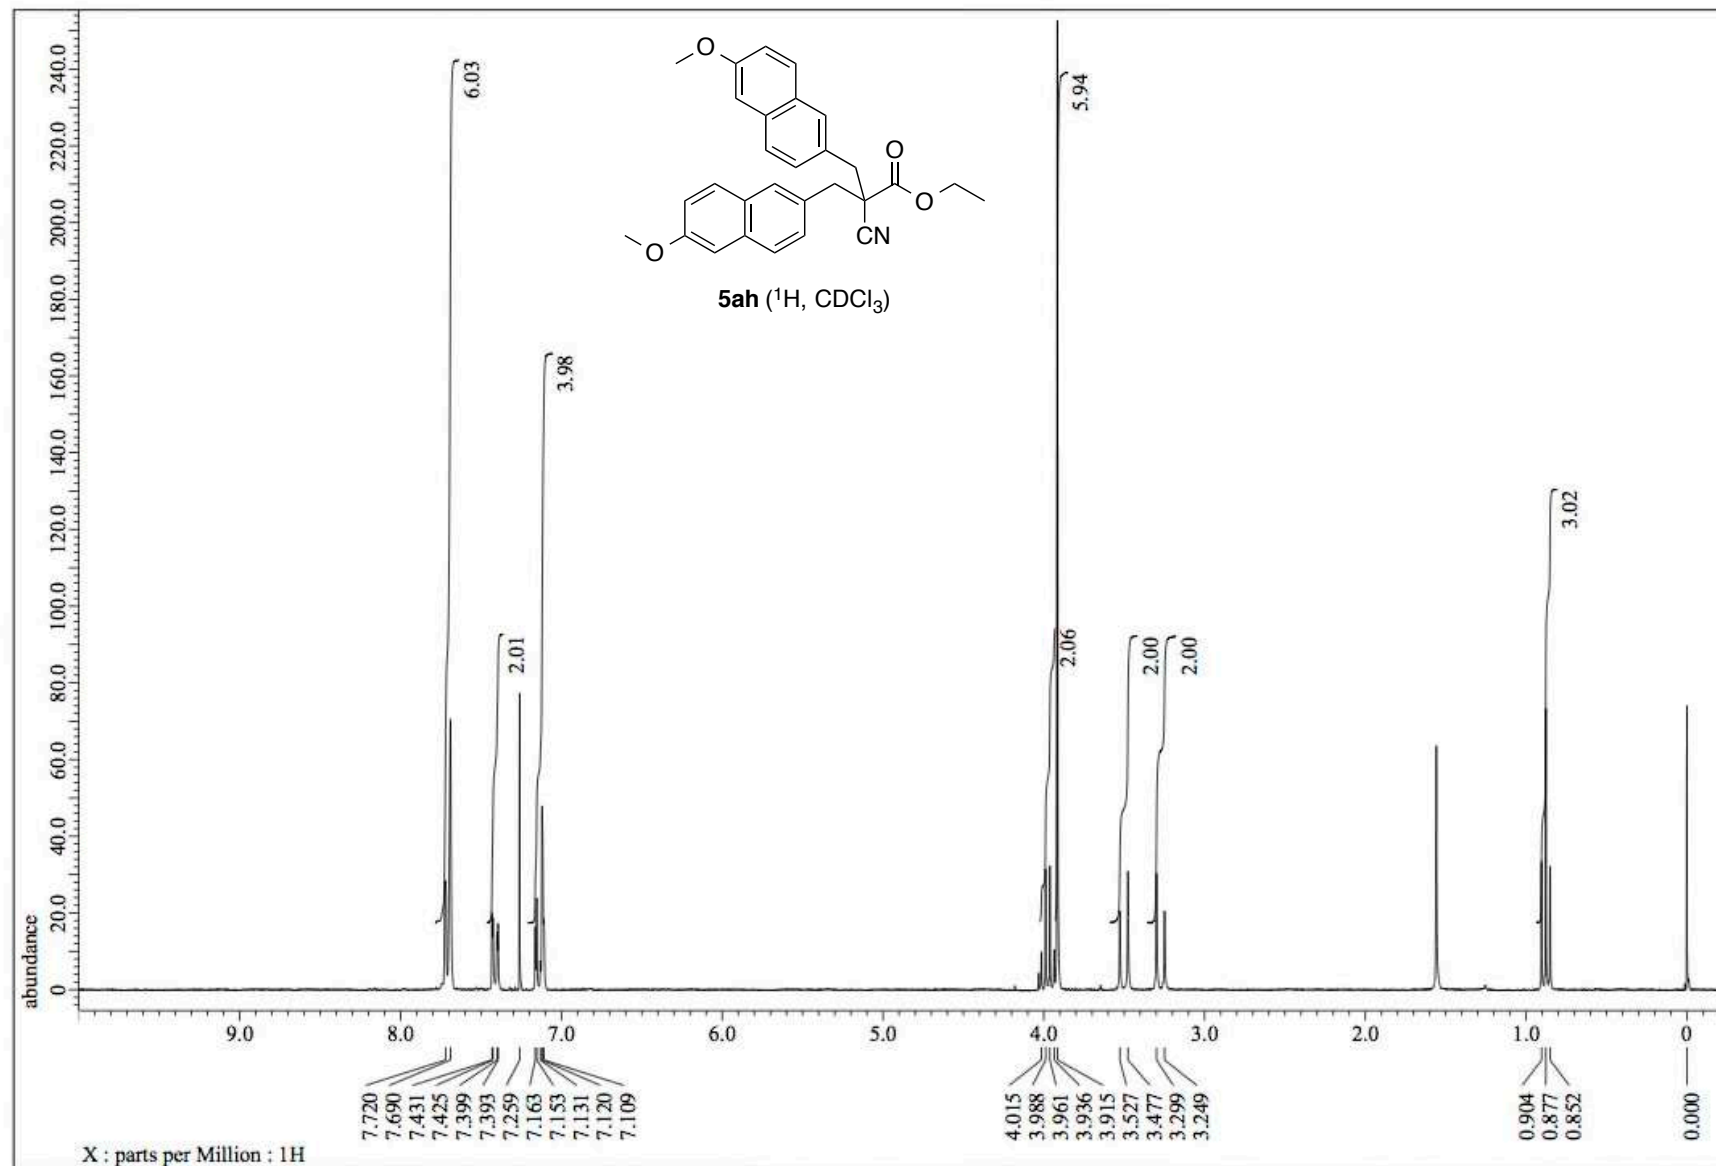

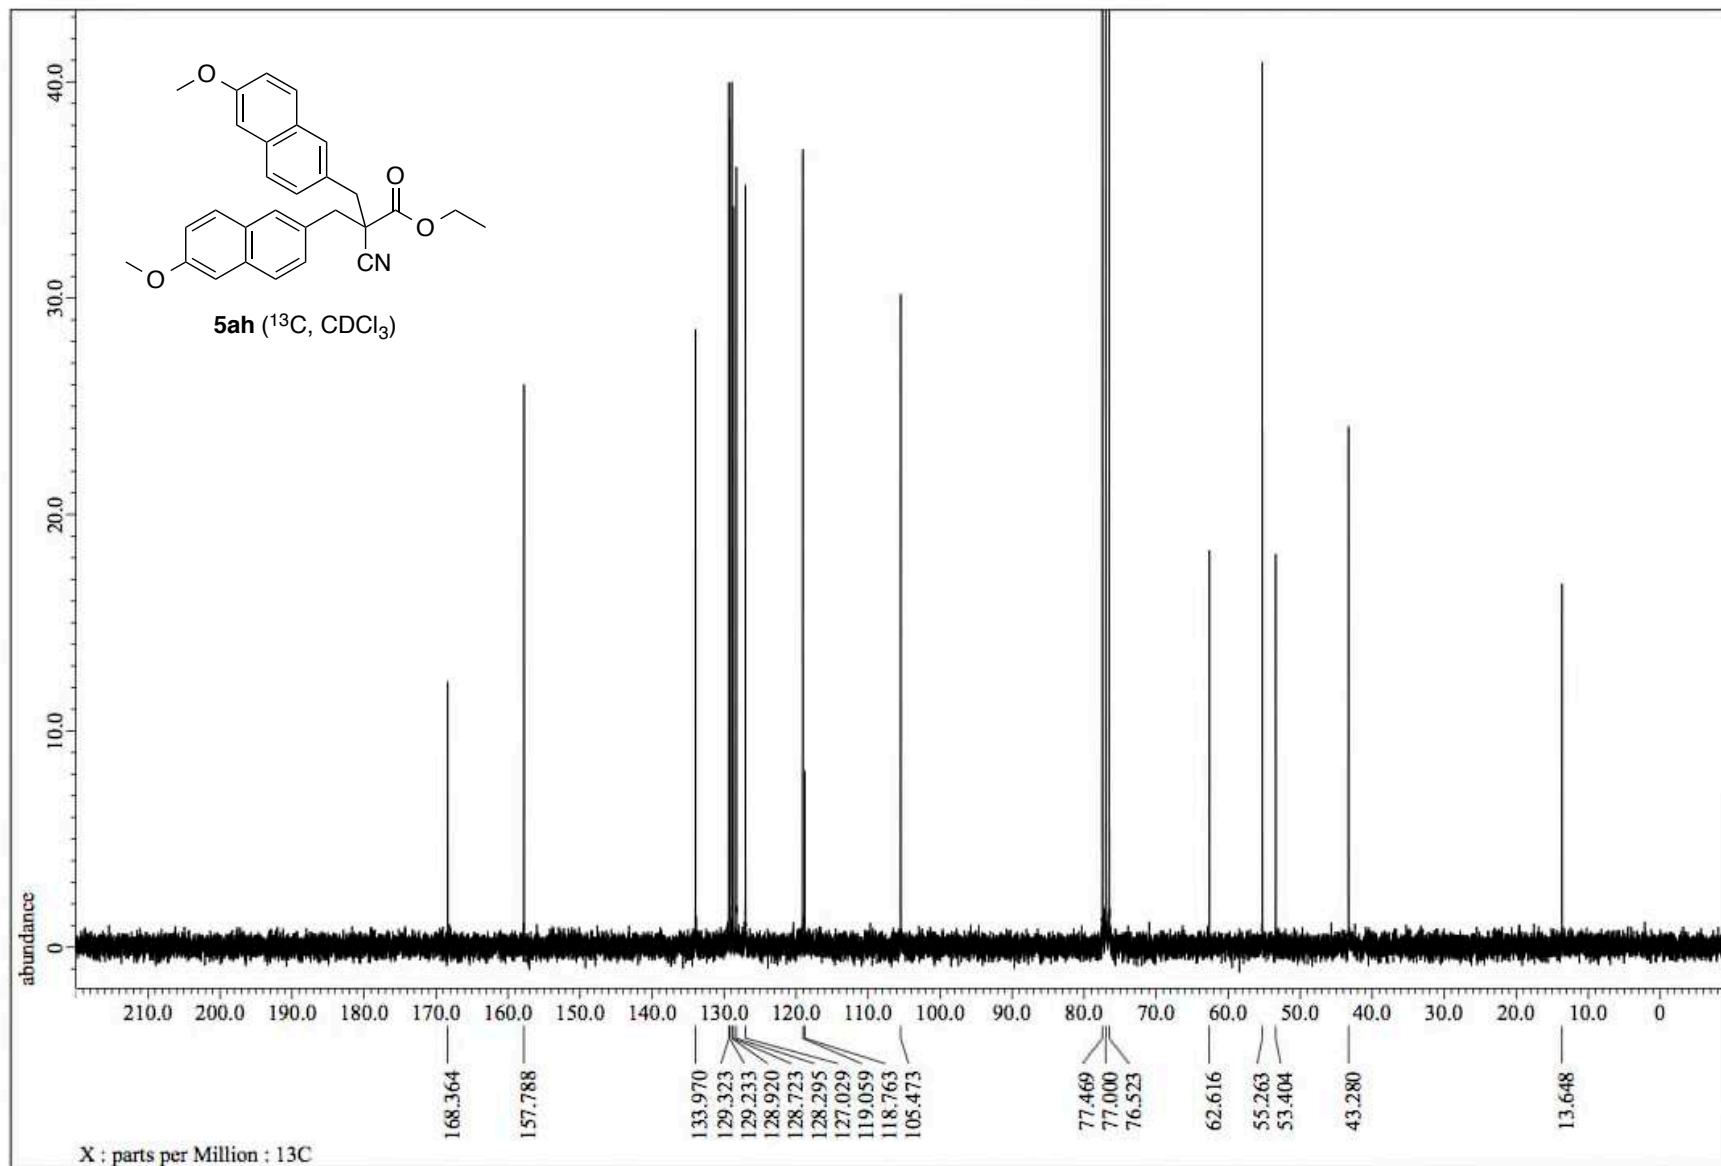

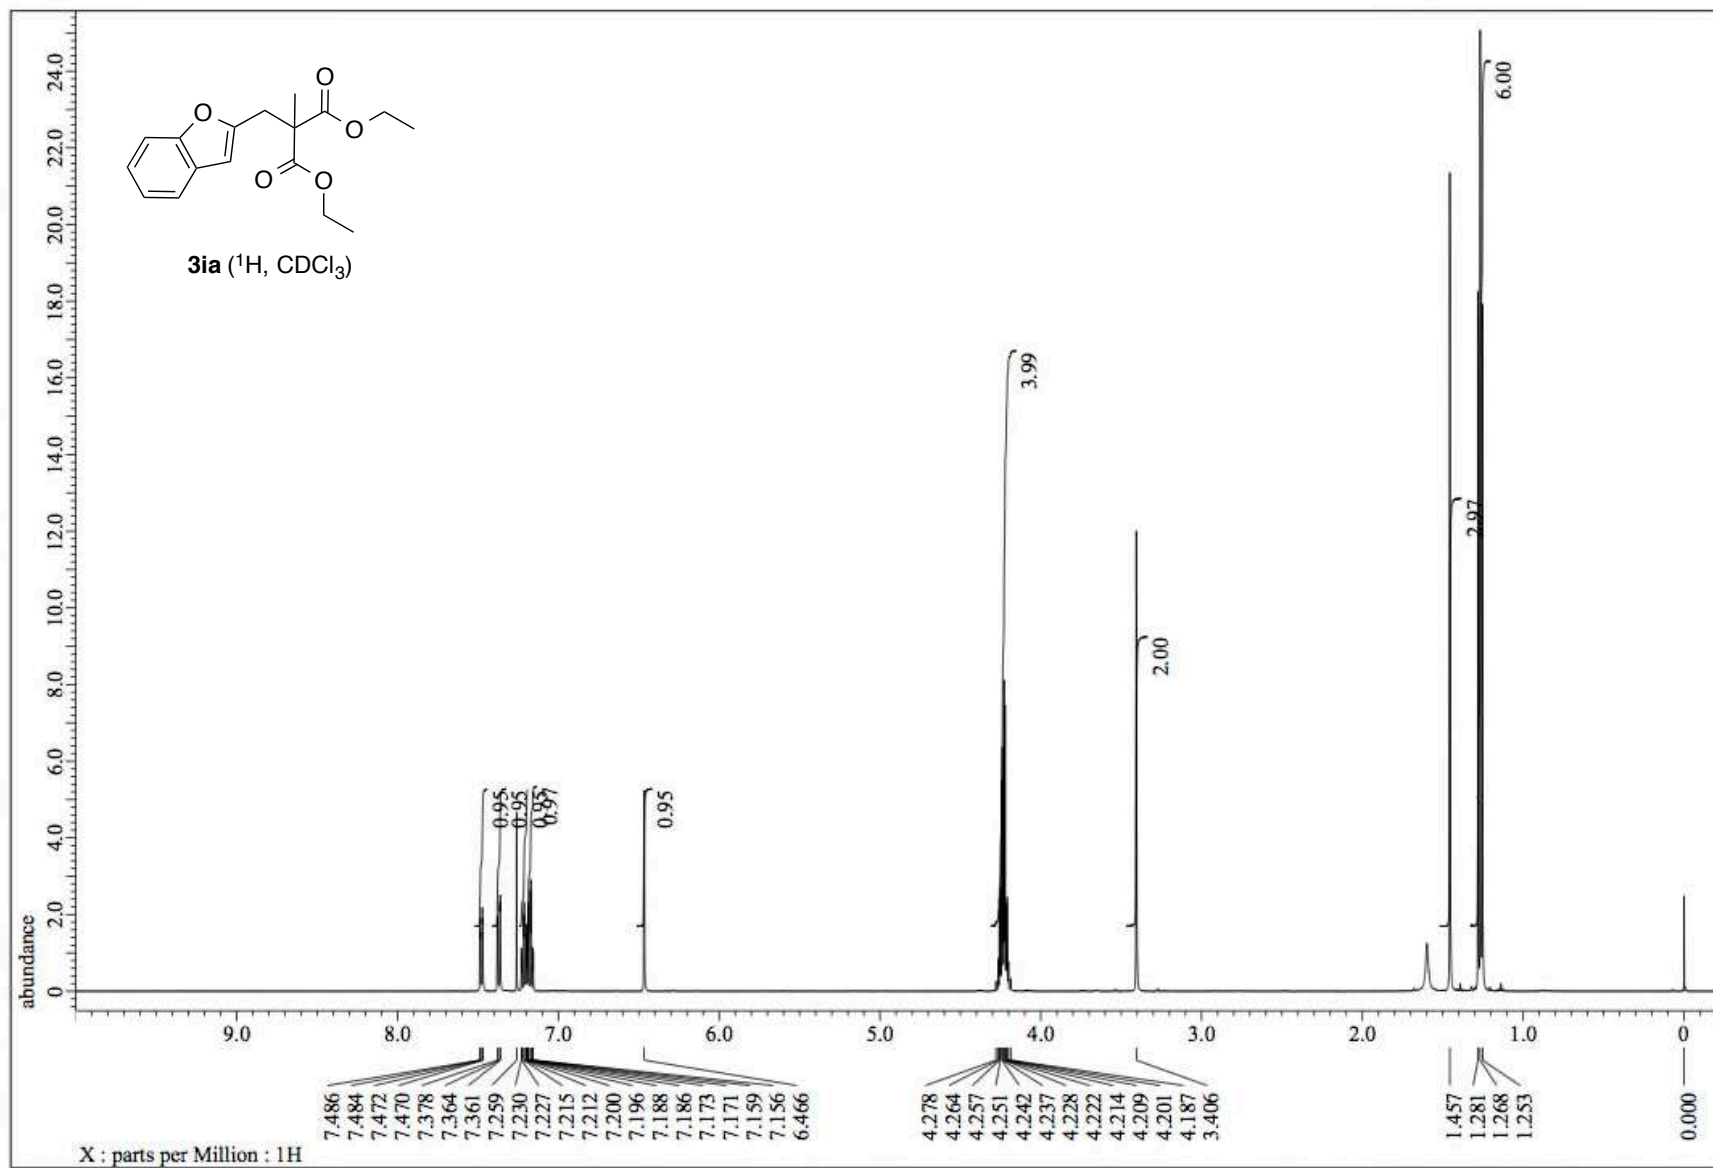

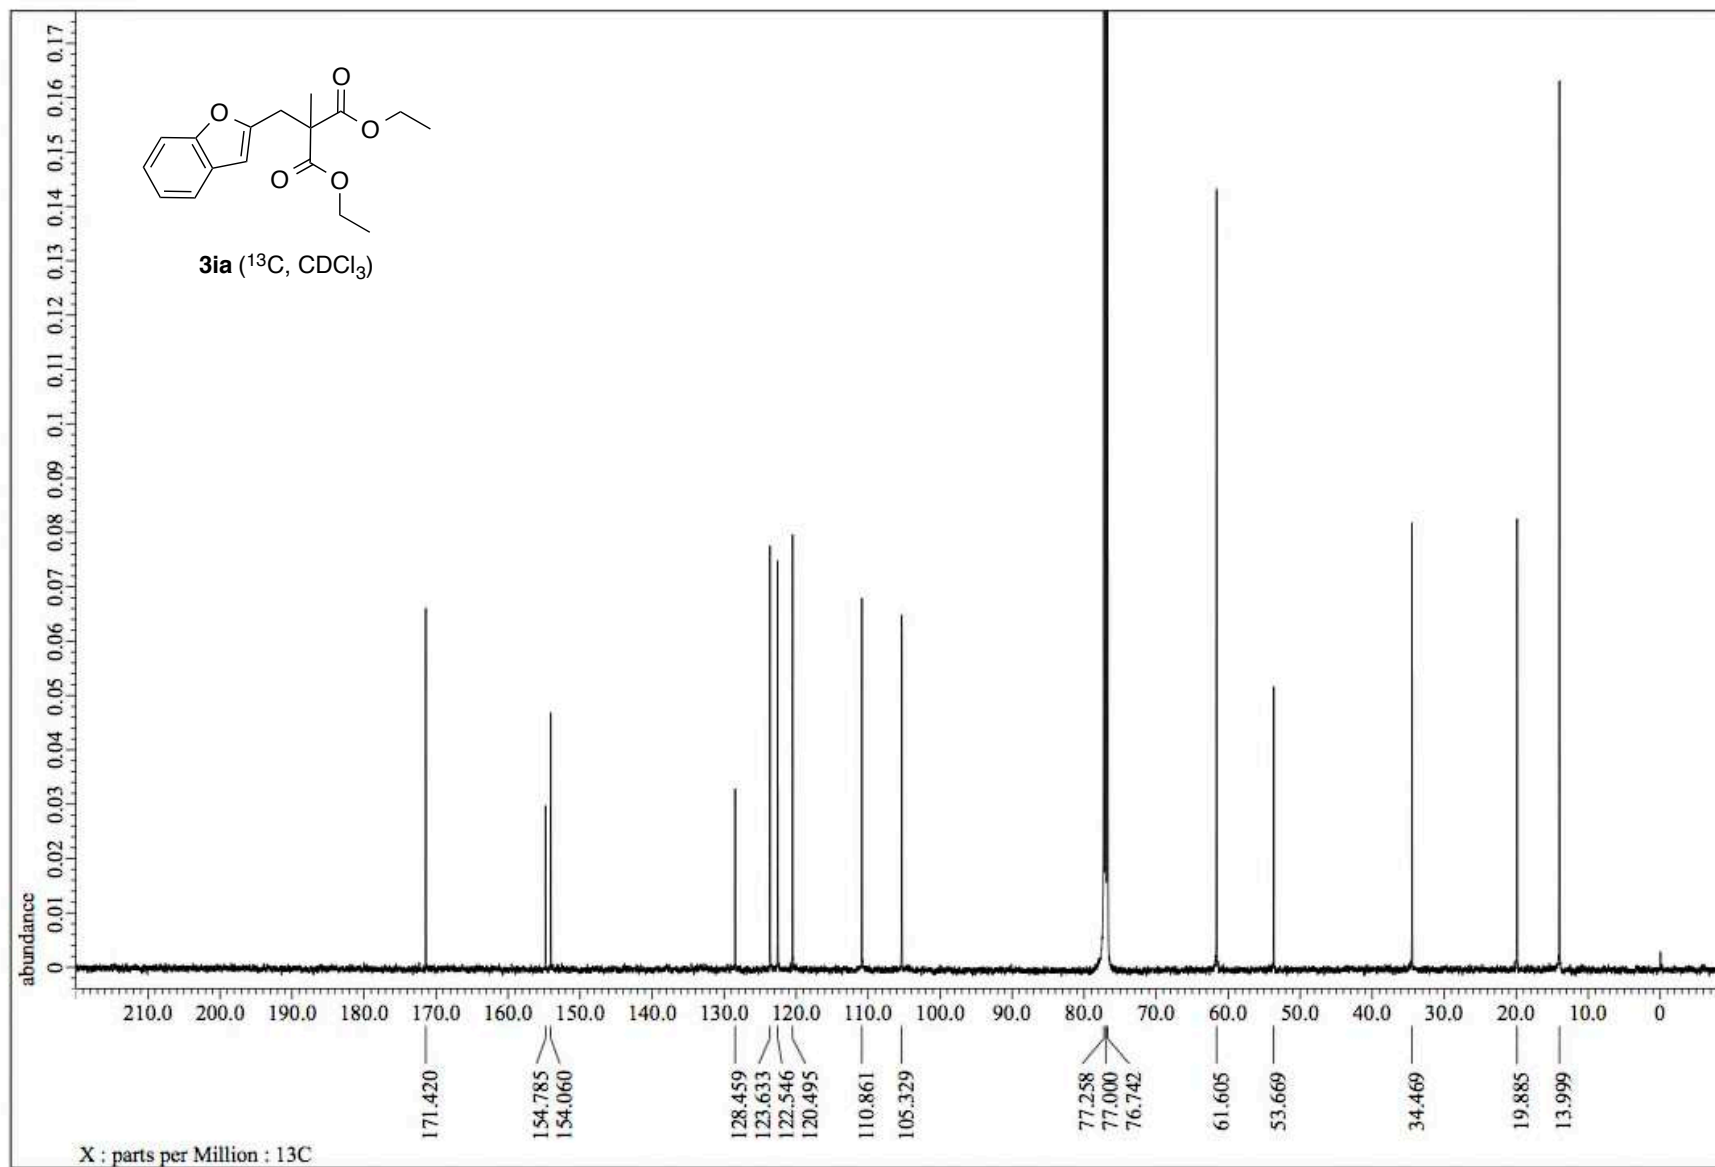

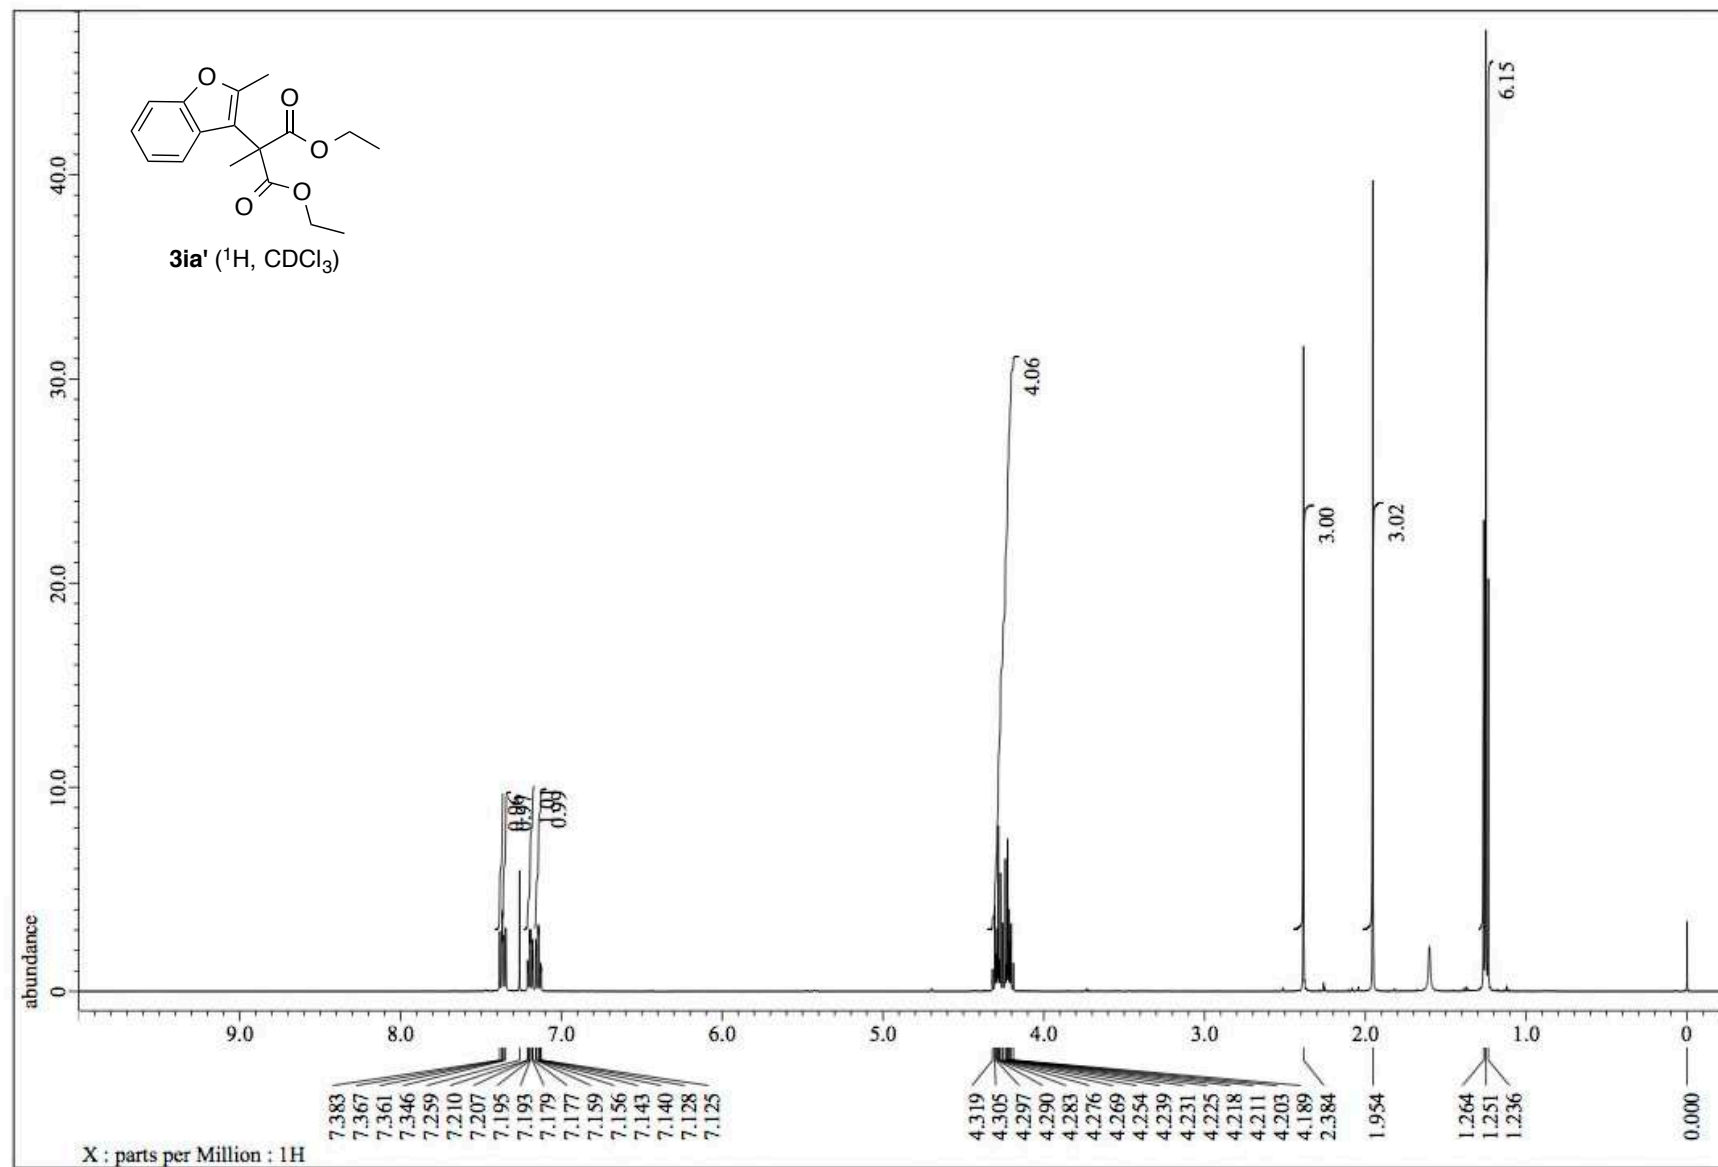

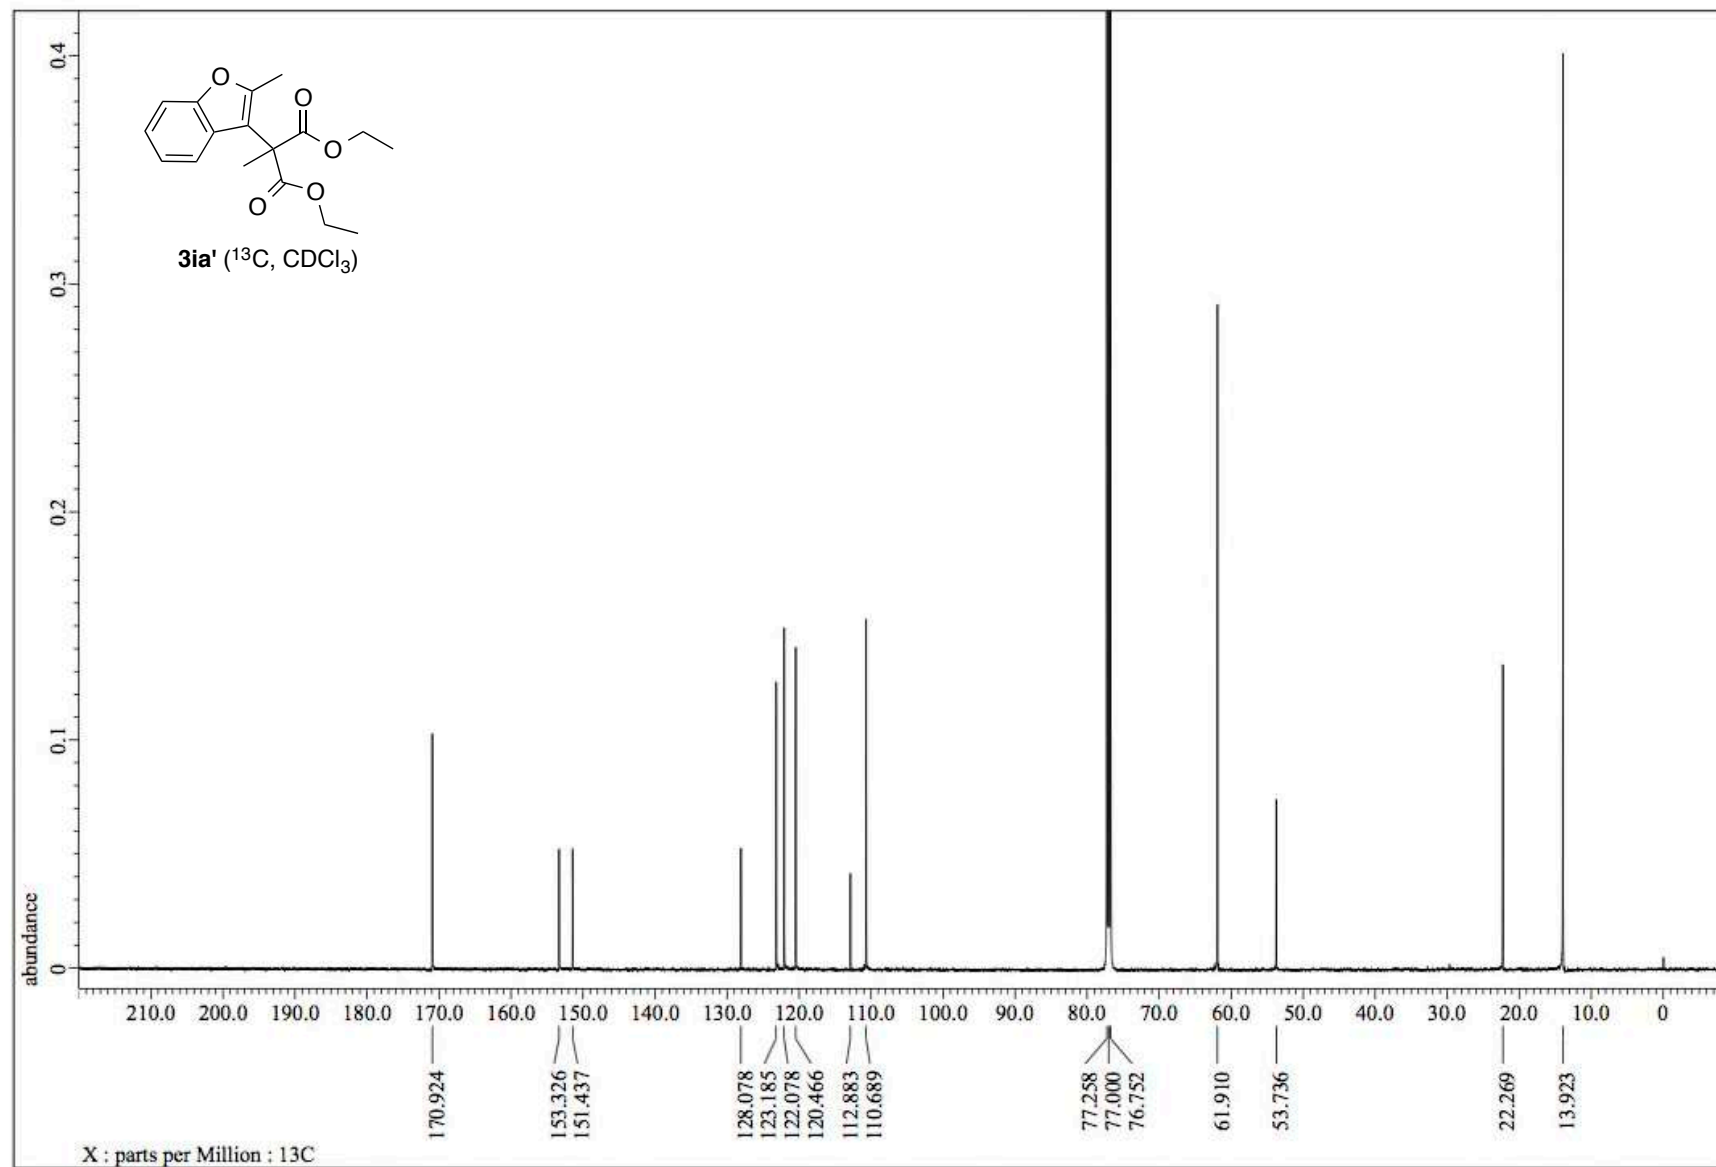



0114 7YT-433-Fr.004 2020/01/14 18:47:26

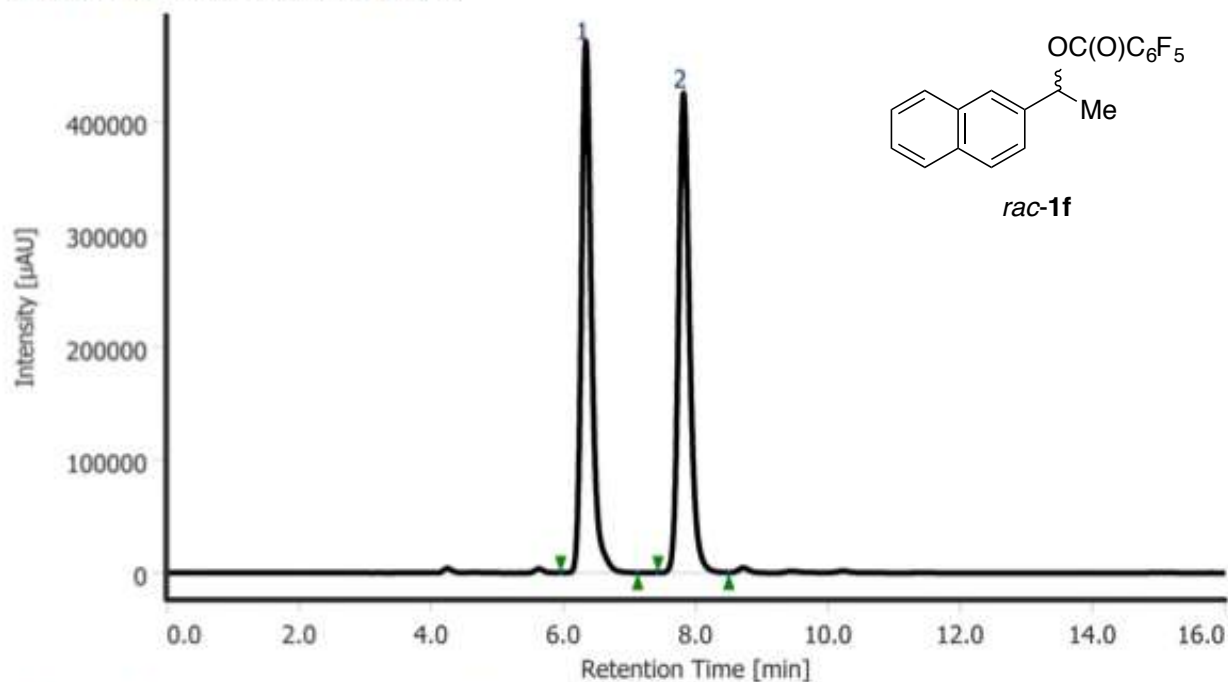

| Number | tR [min] | Area [μV·sec] | Height [μV] | Area%  | Height% |
|--------|----------|---------------|-------------|--------|---------|
| 1      | 6.337    | 5003425       | 470870      | 50.075 | 52.548  |
| 2      | 7.813    | 4988442       | 425239      | 49.925 | 47.454  |

0114 7YT-460-Fr.005 2020/01/14 18:46:41

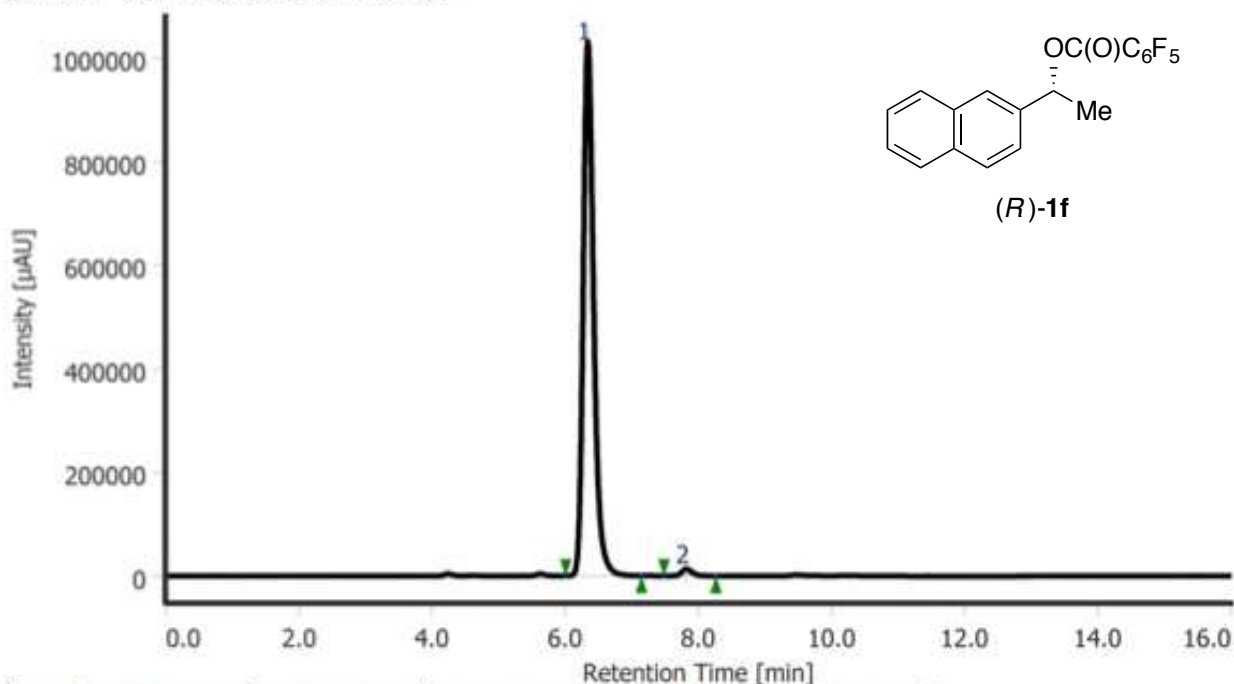

| Number | tR [min] | Area [μV·sec] | Height [μV] | Area%  | Height% |
|--------|----------|---------------|-------------|--------|---------|
| 1      | 6.337    | 11328426      | 1029996     | 98.621 | 98.707  |
| 2      | 7.817    | 158445        | 13488       | 1.379  | 1.293   |

0114 7KS-238-Fr\_001 2020/01/14 18:54:51

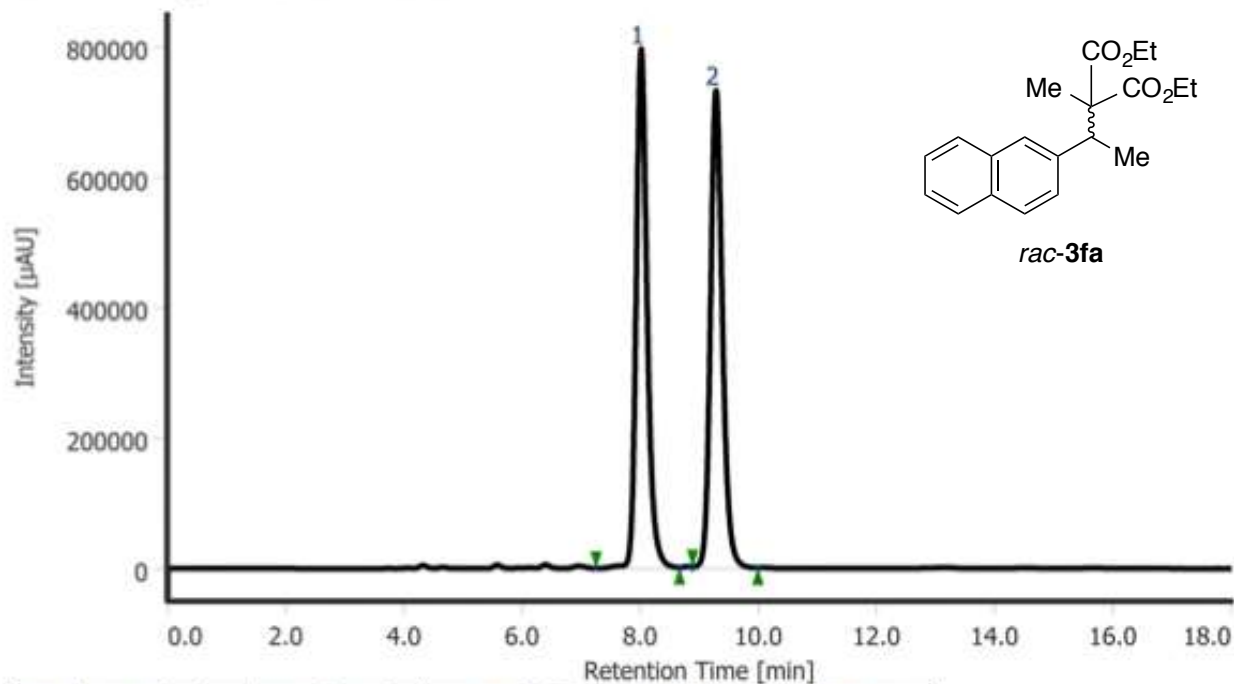

| Number | tR [min] | Area [ $\mu$ V $\cdot$ sec] | Height [ $\mu$ V] | Area%  | Height% |
|--------|----------|-----------------------------|-------------------|--------|---------|
| 1      | 8.010    | 10367853                    | 796055            | 50.041 | 52.078  |
| 2      | 9.280    | 10350841                    | 732586            | 49.959 | 47.924  |

0114 HT-1299-Fr-PTLC\_003 2020/01/16 12:30:18

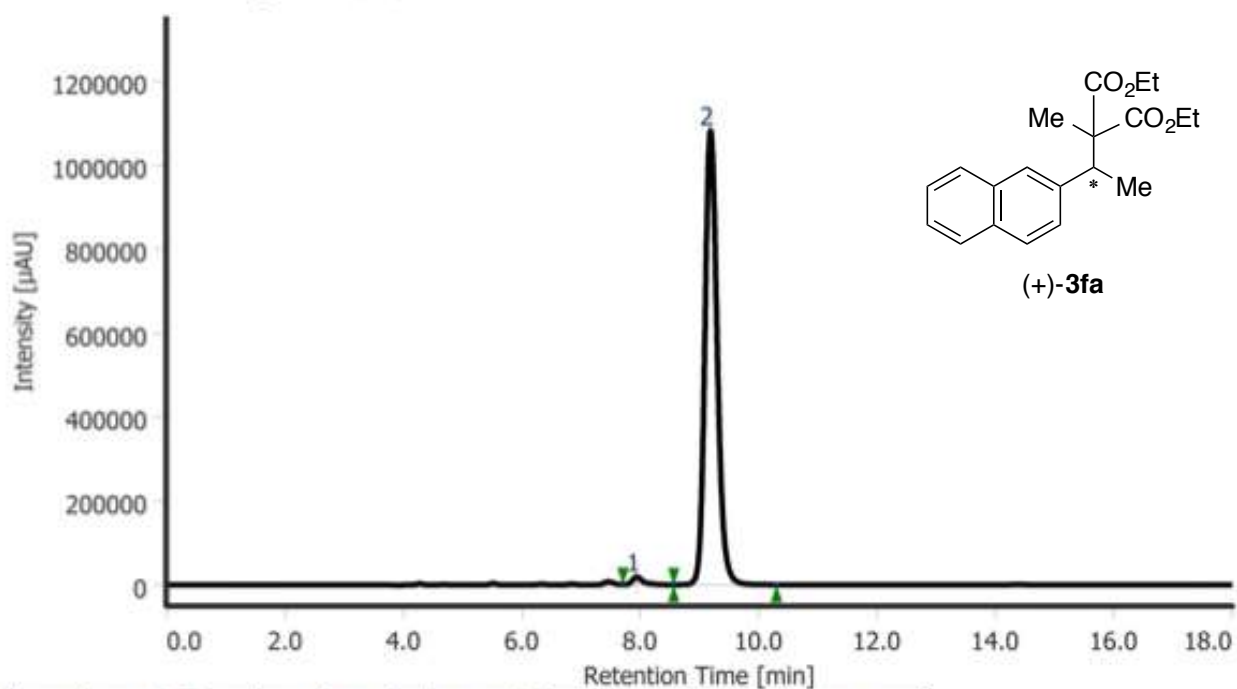

| Number | tR [min] | Area [ $\mu$ V $\cdot$ sec] | Height [ $\mu$ V] | Area%  | Height% |
|--------|----------|-----------------------------|-------------------|--------|---------|
| 1      | 7.940    | 265181                      | 19213             | 1.656  | 1.746   |
| 2      | 9.187    | 15743580                    | 1081455           | 98.344 | 98.254  |
